# Supplementary material for: Gas‐Phase Transformation of Fluorinated Benzoporphyrins to Porphyrin‐Embedded Conical Nanocarbons
Source: PubMed Central journal article supplement (PMC7540561; doi:10.1002/chem.202002638), 2020-09-02
Supplement: CHEM-26-12180-s001.pdf [file CHEM-26-12180-s001.pdf]

# Chemistry–A European Journal

Supporting Information

## Gas-Phase Transformation of Fluorinated Benzoporphyrins to Porphyrin-Embedded Conical Nanocarbons

Dominik Lungerich,<sup>\*,[a, b, c]</sup> Jakob Felix Hitzenberger,<sup>[d]</sup> Michael Ruppel,<sup>[a]</sup> Tibor Döpfer,<sup>[e]</sup> Matthias Witt,<sup>[f]</sup> Ivana Ivanović-Burmazović,<sup>[g]</sup> Andreas Görling,<sup>[e]</sup> Norbert Jux,<sup>\*,[a]</sup> and Thomas Drewello<sup>\*,[d]</sup>

## Author Contributions

D.L. Data curation: Lead; Formal analysis: Lead; Investigation: Equal; Methodology: Supporting; Project administration: Equal; Visualization: Lead; Writing - Original Draft: Lead; Writing - Review & Editing: Lead; Synthesis, Computations: Lead

J.H. Conceptualization: Supporting; Data curation: Equal; Formal analysis: Equal; Methodology: Equal; Visualization: Supporting; Writing - Original Draft: Supporting; Mass spectrometry: Lead

M.R. Conceptualization: Supporting; Data curation: Supporting; Formal analysis: Supporting; Investigation: Supporting; Visualization: Supporting; Writing - Original Draft: Supporting; Writing - Review & Editing: Supporting

T.D. Investigation: Supporting; Computation: Supporting

M.W. Writing - Review & Editing: Supporting; Mass Spectrometry: Supporting

I.I. Resources: Equal

A.G. Funding acquisition: Equal; Resources: Supporting

N.J. Conceptualization: Supporting; Funding acquisition: Equal; Resources: Equal; Supervision: Equal; Writing - Review & Editing: Supporting

T.D. Conceptualization: Equal; Formal analysis: Supporting; Funding acquisition: Lead; Project administration: Equal; Supervision: Equal; Writing - Review & Editing: Equal.

## TABLE OF CONTENT

|     |                                                                                |      |
|-----|--------------------------------------------------------------------------------|------|
| 1.  | SYNTHETIC SECTION                                                              | S2   |
| 1.1 | General information                                                            | S2   |
| 1.2 | Synthesis of molecules                                                         | S3   |
| 1.3 | Chapter S1 – wet-chemical approaches to graphyrin                              | S37  |
|     | Wet-chemical palladium-catalyzed C–H activation                                | S37  |
|     | Wet-chemical intramolecular oxidative cyclodehydrogenation                     | S41  |
| 2.  | MASS SPECTROMETRIC SECTION                                                     | S43  |
| 2.1 | General information                                                            | S43  |
| 2.2 | Chapter S2 – Dissociation Experiments of 8 and 8Pd                             | S44  |
|     | QTOF experiments with 8                                                        | S44  |
|     | FT-ICR experiments with 8                                                      | S45  |
|     | FT-ICR experiments with 8Pd                                                    | S50  |
| 2.3 | Chapter S3 – Dissociation Experiments of 1, 1Co, 1Cu, 1Zn, 2, 7, and Ref       | S51  |
|     | FT-ICR experiments with 2                                                      | S52  |
|     | QTOF experiments with 1                                                        | S54  |
|     | FT-ICR experiments with 1                                                      | S56  |
|     | QTOF experiments with 1Co                                                      | S58  |
|     | FT-ICR experiments with 1Co                                                    | S59  |
|     | QTOF and FT-ICR experiments with 1Cu and 1Zn                                   | S61  |
|     | QTOF Experiments with 7                                                        | S63  |
|     | FT-ICR experiments with Ref (5,10,15,20-tetrakis(pentafluorophenyl)-porphyrin) | S65  |
| 2.4 | Chapter S4 – Dissociation Experiments of 3, 4, 5, 6, and 6Pd                   | S66  |
|     | QTOF experiments with 3                                                        | S66  |
|     | FT-ICR experiments with 3                                                      | S66  |
|     | QTOF experiments with 4                                                        | S67  |
|     | FT-ICR experiments with 4                                                      | S67  |
|     | QTOF experiments with 5                                                        | S68  |
|     | QTOF experiments with 6                                                        | S68  |
|     | QTOF experiments with 6Pd                                                      | S69  |
| 3.  | COMPUTATIONAL ANALYSIS                                                         | S70  |
| 3.1 | General information                                                            | S70  |
| 3.2 | Energy data on cyclization of [1+H] <sup>+</sup> and [1Co] <sup>2+</sup>       | S71  |
| 3.3 | Energy data on cyclization of [1+H] <sup>+</sup> and [1Cu] <sup>2+</sup>       | S72  |
| 3.4 | Normal-coordinate structural decomposition analysis                            | S74  |
| 3.5 | XYZ Coordinates of geometry optimized structures                               | S83  |
| 4.  | REFERENCES                                                                     | S108 |

# 1. SYNTHETIC SECTION

## 1.1 General information

All chemicals were purchased from Sigma-Aldrich and used without any further purification. Solvents were distilled prior to usage. Dichloromethane and chloroform were neutralized with  $K_2CO_3$  before distillation. Microwave-assisted reactions were carried out in the respective vials of a Biotage initiator<sup>+</sup> monomode microwave reactor. Standard stir-rate was 600 rpm, fixed hold time (FHT) was on and no external cooling was applied. Thin layer chromatography (TLC) was performed on Merck silica gel 60 F524, detected by UV-light (254nm, 366nm). Column chromatography was performed on Macherey-Nagel silica gel 60 M (230-400 mesh, 0.04–0.063 mm). NMR spectroscopy was performed on a Bruker Avance Neo CryoProbe DCH ( $^1H$ : 600 MHz,  $^{13}C$ : 150 MHz), Bruker Avance 400 ( $^1H$ : 400 MHz,  $^{13}C$ : 100 MHz), Bruker Avance 300 ( $^1H$ : 300 MHz,  $^{13}C$ : 75 MHz) or Jeol EX400 ( $^1H$ : 400 MHz,  $^{13}C$ : 100 MHz). Deuterated solvents were purchased from Sigma Aldrich and used as received.  $^1H$  NMR and  $^{13}C$  NMR chemical shifts  $\delta$  are given in parts per million [ppm] and are referenced to residual protic impurities in the solvent ( $^1H$  NMR), or to the deuterated solvent itself ( $^{13}C$  NMR). The resonance multiplicities are indicated as “s” (singlet), “d” (doublet), “t” (triplet), “q” (quartet) and “m” (multiplet). Signals referred to as “bs” (broad singlet) are not clearly resolved or significantly broadened. LDI/MALDI-ToF (nitrogen UV-laser, 337 nm) mass spectra were obtained by using a Bruker ultrafleXreme spectrometer with 2,5-dihydroxybenzoic acid (DHB) or (*E*)-2-(3-(4-(*tert*-butyl)phenyl)-2-methylallylidene)malononitrile (dctb) as matrices. ESI/APPI-ToF mass spectrometry was carried out on a Bruker maXis 4G UHR TOF MS/MS-spectrometer or a Bruker micrOTOF II focus TOF MS-spectrometer. IR spectroscopy was performed on a Bruker FT-IR Tensor 27 and Pike MIRacle ATR unit. The ATR unit was equipped with a diamond crystal plate and high-pressure clamp. Spectra were recorded as solid samples directly from the diamond crystal. All absorptions  $\tilde{\nu}$  are given in wave numbers [ $cm^{-1}$ ]. UV/vis spectroscopy was carried out on a Varian Cary 5000 UV-Vis-NIR spectrometer. Spectra were recorded at room temperature using quartz cuvettes with a path length of 1 cm. Fluorescence spectra were recorded on a Shimadzu RF-5301PC spectrofluorophotometer.

## 1.2 Synthesis of molecules

### General Procedure to free-base derivatives

Herein discussed molecules are published and characterized structurally, spectroscopically and electrochemically in detail in our recent publication (M. Ruppel et al. *Chem. Eur. J.* **2020**, *26*, 3287–3296). They were synthesized according to the reported literature procedure and spectroscopic data were in agreement with reported values.<sup>[1]</sup>

### General information on metalated derivatives

Metalated derivatives were used for MS analysis without further spectroscopic characterization. Fluorinated benzoporphyrins show very poor solubility in common organic solvents, in particular if they are present as metalated species. However, whereas free-base species can be easily solubilized by addition of trifluoroacetic acid, this strategy does not apply for metalated derivatives.<sup>[1]</sup>

#### **meso-Tetrakis(2,3,4,5,6-pentafluorophenyl)tetrabenzoporphyrin 1**

Purified by filtration over silica gel (CH<sub>2</sub>Cl<sub>2</sub> + 1% TFA) and subsequent recrystallization from CH<sub>2</sub>Cl<sub>2</sub>/NEt<sub>3</sub> with MeOH, 706 mg, 57%. **<sup>1</sup>H NMR** (400 MHz, CDCl<sub>3</sub>/TFA-d<sub>1</sub>, rt)  $\delta$  [ppm] 7.76–7.74 (m, 16H). **HRMS** (APPI, toluene) *m/z* calcd for C<sub>60</sub>H<sub>18</sub>F<sub>20</sub>N<sub>4</sub> [M]<sup>+</sup> 1174.1207, found 1174.1218.

#### **meso-Tetrakis(2,3,4,5,6-pentafluorophenyl)tetrabenzoporphyrins-Co<sup>II/III</sup> 1Co**

A 100 mL Schlenk-RBF equipped with a magnetic stir bar and a condenser was charged with *meso*-tetrakis(2,3,4,5,6-pentafluorophenyl)tetrabenzoporphyrin **3** (20 mg, 17  $\mu$ mol), Co(OAc)<sub>2</sub>·4H<sub>2</sub>O (50 mg, 200  $\mu$ mol), and dissolved in 1:1 CH<sub>2</sub>Cl<sub>2</sub>/DMF (80 mL) under N<sub>2</sub> atmosphere. The mixture was heated at reflux for 4 h in darkness, until all starting material was consumed by TLC. After cooling to rt, the CH<sub>2</sub>Cl<sub>2</sub> was removed in vacuo and the remaining mixture diluted with H<sub>2</sub>O (50 mL). The remaining product was filtered and dried in vacuo, giving a crystalline dark blue solid (19 mg). *Further purification was carried out in-situ in the mass spectrometer by selective ion filtration in the quadrupole. NMR characterization was neglected because of the*

*paramagnetic character of Co<sup>III</sup>-porphyrinoids combined with its poor solubility. HRMS* (APPI, toluene) m/z calcd for C<sub>60</sub>H<sub>16</sub>CoF<sub>20</sub>N<sub>4</sub> [M]<sup>+</sup> 1231.03821, found 1231.03929.

***meso-Tetrakis(2,3,4,5,6-pentafluorophenyl)tetrabenzoporphyrins-Cu<sup>II</sup> 1Cu***

A 20 mL Schlenk-tube equipped with a magnetic stir bar was charged with the *meso*-tetrakis(2,3,4,5,6-pentafluorophenyl)tetrabenzoporphyrin **3** (20 mg, 17 μmol) and dissolved in CH<sub>2</sub>Cl<sub>2</sub> (15 mL) and NEt<sub>3</sub> (3 drops). Then, a saturated solution of Cu(OAc)<sub>2</sub> in MeOH (2.5 mL) was added and the mixture was stirred at rt for 18 h in darkness. The mixture was concentrated and the residue was purified by plug filtration (SiO<sub>2</sub>, 4x8 cm; CH<sub>2</sub>Cl<sub>2</sub>). The bright green fraction was concentrated and the product was reprecipitated from CH<sub>2</sub>Cl<sub>2</sub> and MeOH, giving a dark green/blue solid (17 mg). *Further purification was carried out in-situ in the mass spectrometer by selective ion filtration in the quadrupole. NMR characterization was neglected because of the paramagnetic character of Cu<sup>II</sup>-porphyrinoids combined with its poor solubility. HRMS* (APPI, toluene) m/z calcd for C<sub>60</sub>H<sub>16</sub>CuF<sub>20</sub>N<sub>4</sub> [M]<sup>+</sup> 1235.03461, found 1231.03587.

***meso-Tetrakis(2,3,4,5,6-pentafluorophenyl)tetrabenzoporphyrins-Zn<sup>II</sup> 1Zn***

A 100 mL Schlenk-RBF equipped with a magnetic stir bar and a condenser was charged with the *meso*-tetrakis(2,3,4,5,6-pentafluorophenyl)tetrabenzoporphyrin **3** (20 mg, 17 μmol), Zn(OAc)<sub>2</sub>·2H<sub>2</sub>O (50 mg, 228 μmol) and dissolved in THF (50 mL) under N<sub>2</sub> atmosphere. The mixture was heated at reflux for 18 h in darkness. After cooling to rt, the mixture was diluted with H<sub>2</sub>O (50 mL), extracted with CH<sub>2</sub>Cl<sub>2</sub> and dried over MgSO<sub>4</sub>. The bright green organic layer was concentrated and the product was reprecipitated from CH<sub>2</sub>Cl<sub>2</sub> and MeOH, giving a dark green solid (20 mg). *Further purification was dispensed, because Zn-TATBPs are prone to demetallation in even 1% HCl. Therefore, purification was carried out in-situ in the mass spectrometer by selective ion filtration in the quadrupole. NMR characterization was neglected because of the poor solubility and instant demetallation upon addition of solubilizing TFA. HRMS* (APPI, toluene) m/z calcd for C<sub>60</sub>H<sub>16</sub>F<sub>20</sub>N<sub>4</sub>Zn [M]<sup>+</sup> 1236.03416, found 1236.03640.

### **meso-Tetrakis(2,6-difluorophenyl)tetrabenzoporphyrins 2**

Purified by filtration over silica gel (CH<sub>2</sub>Cl<sub>2</sub> + 1% TFA) and subsequent recrystallization from CH<sub>2</sub>Cl<sub>2</sub>/NEt<sub>3</sub> with MeOH, 588 mg, 58%. **<sup>1</sup>H NMR** (600 MHz, CDCl<sub>3</sub>/TFA-d<sub>1</sub>, rt) δ [ppm] 8.01–7.97 (m, 4H), 7.71–7.69 (AA'BB', 8H), 7.61–7.60 (AA'BB', 8H), 7.51–7.49 (m, 8H). **HRMS** (APPI, THF) m/z calcd for C<sub>60</sub>H<sub>31</sub>F<sub>8</sub>N<sub>4</sub> [M+H]<sup>+</sup> 959.2415, found 959.2412.

### **meso-Tetrakis(3,5-difluorophenyl)tetrabenzoporphyrins 3**

Purified by filtration over silica gel (CH<sub>2</sub>Cl<sub>2</sub> + 1% TFA) and subsequent recrystallization from CH<sub>2</sub>Cl<sub>2</sub>/NEt<sub>3</sub> with MeOH, 708 mg, 70%. **<sup>1</sup>H NMR** (600 MHz, CDCl<sub>3</sub>/TFA-d<sub>1</sub>, rt) δ [ppm] 8.09–8.08 (m, 8H), 7.60–7.58 (AA'BB', 8H), 7.56–7.54 (AA'BB', 8H), 7.50 (tt, <sup>3</sup>J<sub>HF</sub>= 8.4 Hz, <sup>4</sup>J<sub>HH</sub>= 2.2 Hz, 4H). **HRMS** (APPI, toluene) m/z calcd for C<sub>60</sub>H<sub>30</sub>F<sub>8</sub>N<sub>4</sub> [M]<sup>+</sup> 958.2337, found 958.2325.

### **meso-Tetrakis(3,4,5-trifluorophenyl)tetrabenzoporphyrin 4**

Purified by filtration over silica gel (CH<sub>2</sub>Cl<sub>2</sub> + 1% TFA) and subsequent recrystallization from CH<sub>2</sub>Cl<sub>2</sub>/NEt<sub>3</sub> with MeOH, 642 mg, 59%. **<sup>1</sup>H NMR** (600 MHz, CDCl<sub>3</sub>/TFA-d<sub>1</sub>, rt) δ [ppm] 8.19 (t, <sup>3</sup>J<sub>HF</sub>= 6.2 Hz, 8 H), 7.65–7.63 (AA'BB', 8H), 7.55–7.53 (AA'BB', 8H). **HRMS** (APPI, toluene) m/z calcd for C<sub>60</sub>H<sub>26</sub>F<sub>12</sub>N<sub>4</sub> [M]<sup>+</sup> 1030.1960, found 1030.1951

### **meso-Tetrakis(4-fluorophenyl)tetrabenzoporphyrins 5**

Purified by filtration over silica gel (CH<sub>2</sub>Cl<sub>2</sub> + 1% TFA) and subsequent recrystallization from CH<sub>2</sub>Cl<sub>2</sub>/NEt<sub>3</sub> with MeOH, 805 mg, 86%. **<sup>1</sup>H NMR** (600 MHz, CDCl<sub>3</sub>/TFA-d<sub>1</sub>, rt) δ [ppm] 8.50–8.48 (m, 8H), 7.66–7.63 (m, 8H), 7.52–7.49 (AA'BB', 8H), 7.48–7.46 (AA'BB', 8H). **HRMS** (APPI, MeCN/toluene) m/z calcd for C<sub>60</sub>H<sub>34</sub>F<sub>4</sub>N<sub>4</sub> [M]<sup>+</sup> 886.2714, found 886.2703.

### **meso-Tetrakis(2-fluorophenyl)tetrabenzoporphyrins 6**

Purified by filtration over silica gel (CH<sub>2</sub>Cl<sub>2</sub> + 1% TFA) and subsequent recrystallization from CH<sub>2</sub>Cl<sub>2</sub>/NEt<sub>3</sub> with MeOH, 749 mg, 80% (*mixture of atropisomers*). **<sup>1</sup>H NMR** (400

MHz, CD<sub>2</sub>Cl<sub>2</sub>/TFA-d<sub>1</sub>, rt)  $\delta$  [ppm] 8.59–8.45 (m, 4H), 8.10–8.04 (m, 4H), 7.82–7.76 (m, 4H), 7.72–7.66 (m, 4H), 7.62–7.55 (m, 16H). **HRMS** (ESI, MeCN/toluene) m/z calcd for C<sub>60</sub>H<sub>35</sub>F<sub>4</sub>N<sub>4</sub> [M+H]<sup>+</sup> 887.2792, found 887.2776.

#### **meso-Tetrakis(2-fluorophenyl)tetrabenzoporphyrin-Pd<sup>II</sup> 6Pd**

A 50 mL Schlenk-RBF equipped with a magnetic stir bar and a condenser was charged with 15 equiv. PdCl<sub>2</sub> (9 mg, 507  $\mu$ mol) in PhCN (10 mL) and heated to 180 °C under N<sub>2</sub> atmosphere. After all inorganics were dissolved, meso-tetrakis(2-fluorophenyl)-tetrabenzoporphyrin **8** (30 mg, 34  $\mu$ mol) was added and the mixture was stirred at 180 °C for 1 h. The solvent was removed in vacuo and the residue was purified by plug filtration (SiO<sub>2</sub>, 3x8 cm; CH<sub>2</sub>Cl<sub>2</sub>). The bright green fraction was concentrated and the product was re-precipitated from CH<sub>2</sub>Cl<sub>2</sub> and MeOH. *NMR characterization was neglected because of the poor solubility in common solvents.* **HRMS** (ESI, CH<sub>2</sub>Cl<sub>2</sub>/MeCN) m/z calcd for C<sub>60</sub>H<sub>28</sub>Cl<sub>8</sub>N<sub>4</sub>Pd [M]<sup>+</sup> 990.16122, found 990.15871.

#### **meso-Tetrakis(4-bromo-2,6-difluorophenyl)tetrabenzoporphyrin 7**

Purified by filtration over silica gel (CH<sub>2</sub>Cl<sub>2</sub> + 1% TFA) and subsequent recrystallization from CH<sub>2</sub>Cl<sub>2</sub>/NEt<sub>3</sub> with MeOH, 578 mg, 43%. **<sup>1</sup>H NMR** (600 MHz, CD<sub>2</sub>Cl<sub>2</sub>/TFA-d<sub>1</sub>, rt)  $\delta$  [ppm] 7.81–7.80 (AA'BB', 8H), 7.78 (d, <sup>3</sup>J<sub>HF</sub> = 6.7 Hz, 8H), 7.73–7.71 (AA'BB', 8H). **<sup>13</sup>C{<sup>1</sup>H} NMR** (150 MHz, CD<sub>2</sub>Cl<sub>2</sub>/TFA-d<sub>1</sub>, rt)  $\delta$  [ppm] 162.11 (dd, <sup>1</sup>J<sub>CF</sub> = 257.2 Hz, <sup>3</sup>J<sub>CF</sub> = 5.8 Hz), 141.5, 141.3, 131.7, 130.7, 127.5 (t, <sup>3</sup>J<sub>CF</sub> = 12.1 Hz), 123.4, 117.9 (dd, <sup>2</sup>J<sub>CF</sub> = 24.2 Hz, <sup>4</sup>J<sub>CF</sub> = 3.2 Hz), 115.4 (t, <sup>2</sup>J<sub>CF</sub> = 17.8 Hz), 99.1, 99.0. **<sup>19</sup>F{<sup>1</sup>H} NMR** (470 MHz, CD<sub>2</sub>Cl<sub>2</sub>/TFA-d<sub>1</sub>, rt)  $\delta$  [ppm] -109.6. **HRMS** (ESI, CH<sub>2</sub>Cl<sub>2</sub>/MeCN) m/z calcd for C<sub>60</sub>H<sub>27</sub>Br<sub>4</sub>F<sub>8</sub>N<sub>4</sub> [M+H]<sup>+</sup> 1270.8836, found 1270.8831.

#### **meso-Tetrakis(2,6-dichlorophenyl)tetrabenzoporphyrin 8**

Purified by filtration over silica gel (CH<sub>2</sub>Cl<sub>2</sub> + 1% TFA) and subsequent recrystallization from CH<sub>2</sub>Cl<sub>2</sub>/NEt<sub>3</sub> with MeOH, 654 mg, 57%. **<sup>1</sup>H NMR** (400 MHz, CDCl<sub>3</sub>/TFA-d<sub>1</sub>, rt)  $\delta$  [ppm] 7.94–7.86 (m, 12H), 7.62–7.59 (AA'BB', 8H), 7.54–7.50 (AA'BB', 8H). **HRMS** (APPI, toluene) m/z calcd for C<sub>60</sub>H<sub>30</sub>Cl<sub>8</sub>N<sub>4</sub> [M]<sup>+</sup> 1085.9973, found 1085.9972



### **meso-Tetrakis(2,6-dichlorophenyl)tetrabenzoporphyrin-Pd<sup>II</sup> 8Pd**

A 50 mL Schlenk-RBF equipped with a magnetic stir bar and a condenser was charged with 15 equiv. PdCl<sub>2</sub> (12 mg, 690 μmol) in PhCN (10 mL) and heated to 180 °C under N<sub>2</sub> atmosphere. After all inorganics were dissolved, *meso*-tetrakis(2,6-dichlorophenyl)-tetrabenzoporphyrin **1** (50 mg, 46 μmol) was added and the mixture was stirred at 180 °C for 1.5 h. The solvent was removed in vacuo and the residue was purified by plug filtration (SiO<sub>2</sub>, 3x8 cm; CH<sub>2</sub>Cl<sub>2</sub>). The bright green fraction was concentrated and the product was re-precipitated from CH<sub>2</sub>Cl<sub>2</sub> and MeOH. *NMR characterization was neglected because of the poor solubility in common solvents.* **HRMS** (ESI, CH<sub>2</sub>Cl<sub>2</sub>/MeCN) *m/z* calcd for C<sub>60</sub>H<sub>28</sub>Cl<sub>8</sub>N<sub>4</sub>Pd [M]<sup>+</sup> 1189.88570, found 1089.99149.

### **meso-Tetrakis(2,6-dibromophenyl)tetrabenzoporphyrin S1**

Purified by filtration over silica gel (CH<sub>2</sub>Cl<sub>2</sub> + 1% TFA) and subsequent recrystallization from CH<sub>2</sub>Cl<sub>2</sub>/NEt<sub>3</sub> with MeOH, 664 mg, 44%. **<sup>1</sup>H NMR** (600 MHz, CD<sub>2</sub>Cl<sub>2</sub>/TFA-d<sub>1</sub>, rt) *δ* [ppm] 8.20 (d, <sup>3</sup>J<sub>HH</sub> = 8.1 Hz, 8H), 7.76 (t, <sup>3</sup>J<sub>HH</sub> = 8.1 Hz, 4H), 7.69–7.67 (AA'BB', 8H), 7.60–7.58 (AA'BB', 8H). **HRMS** (ESI) *m/z* calcd for C<sub>60</sub>H<sub>31</sub>Br<sub>8</sub>N<sub>4</sub> [M+H]<sup>+</sup> 1438.6010, found 1438.6022.

### **meso-Tetrakis(3,4,5-trimethoxyphenyl)tetrabenzoporphyrin S2**

Purified by filtration over silica gel (CH<sub>2</sub>Cl<sub>2</sub>/THF, 1:2, v:v) and subsequent recrystallization from CH<sub>2</sub>Cl<sub>2</sub>/NEt<sub>3</sub> with MeOH, 702 mg, 56%. **<sup>1</sup>H NMR** (400 MHz, acetone-d<sub>6</sub>/TFA-d<sub>1</sub>, rt) *δ* [ppm] 8.11 (s, 8H), 7.71–7.66 (AA'BB', 8H), 7.57–7.54 (AA'BB', 8H), 4.11 (s, 12H), 3.94 (s, 24H). **HRMS** (APPI, toluene/CH<sub>2</sub>Cl<sub>2</sub>) *m/z* calcd for C<sub>72</sub>H<sub>62</sub>N<sub>4</sub>O<sub>12</sub> [M]<sup>+</sup> 1174.4359, found 1174.4363.

### **meso-Tetraphenyltetrabenzoporphyrin S3**

Purified by filtration over silica gel (CH<sub>2</sub>Cl<sub>2</sub>) and subsequent recrystallization from CH<sub>2</sub>Cl<sub>2</sub>/NEt<sub>3</sub> with MeOH, 645 mg, 75%. **<sup>1</sup>H NMR** (400 MHz, CD<sub>2</sub>Cl<sub>2</sub>, rt) *δ* [ppm] 8.36–8.33 (m, 8H), 7.99–7.88 (m, 12H), 7.26 (br, 16H), -1.21 (br, 2H). **HRMS** (APPI, toluene) *m/z* calcd for C<sub>60</sub>H<sub>39</sub>N<sub>4</sub> [M+H]<sup>+</sup> 815.3169, found 815.3184.

DL10 (D. Lungerich) in C2/c

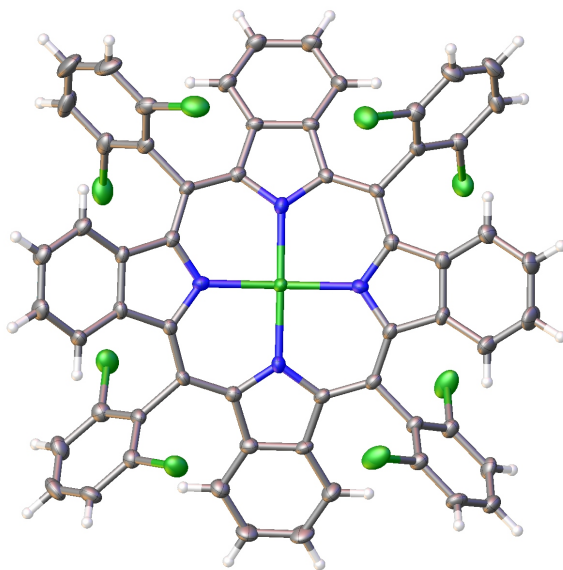

**Figure S1.** Single crystal X-ray structure of **8Pd**. Thermal ellipsoids are drawn at 50% probability level; CCDC: 1950258. For more information, refer to: Ruppel et al. *Chem. Eur. J.* **2020**, *26*, 3287–3296.

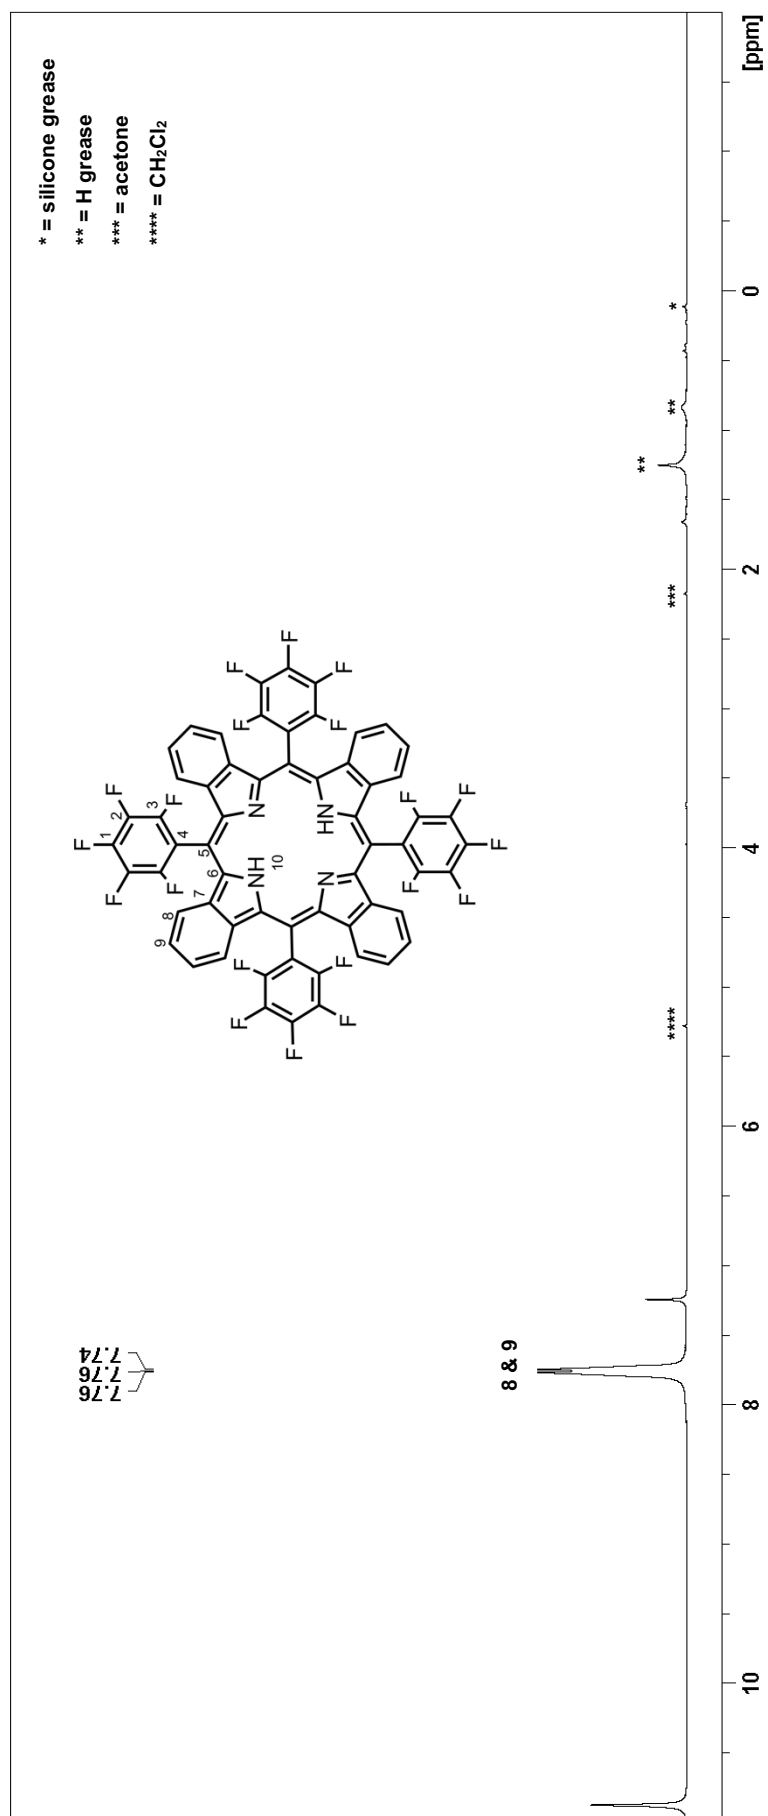

Figure S2.  $^1\text{H}$  NMR (400 MHz,  $\text{CDCl}_3/\text{TFA-d}_1$ , rt) of **1**.

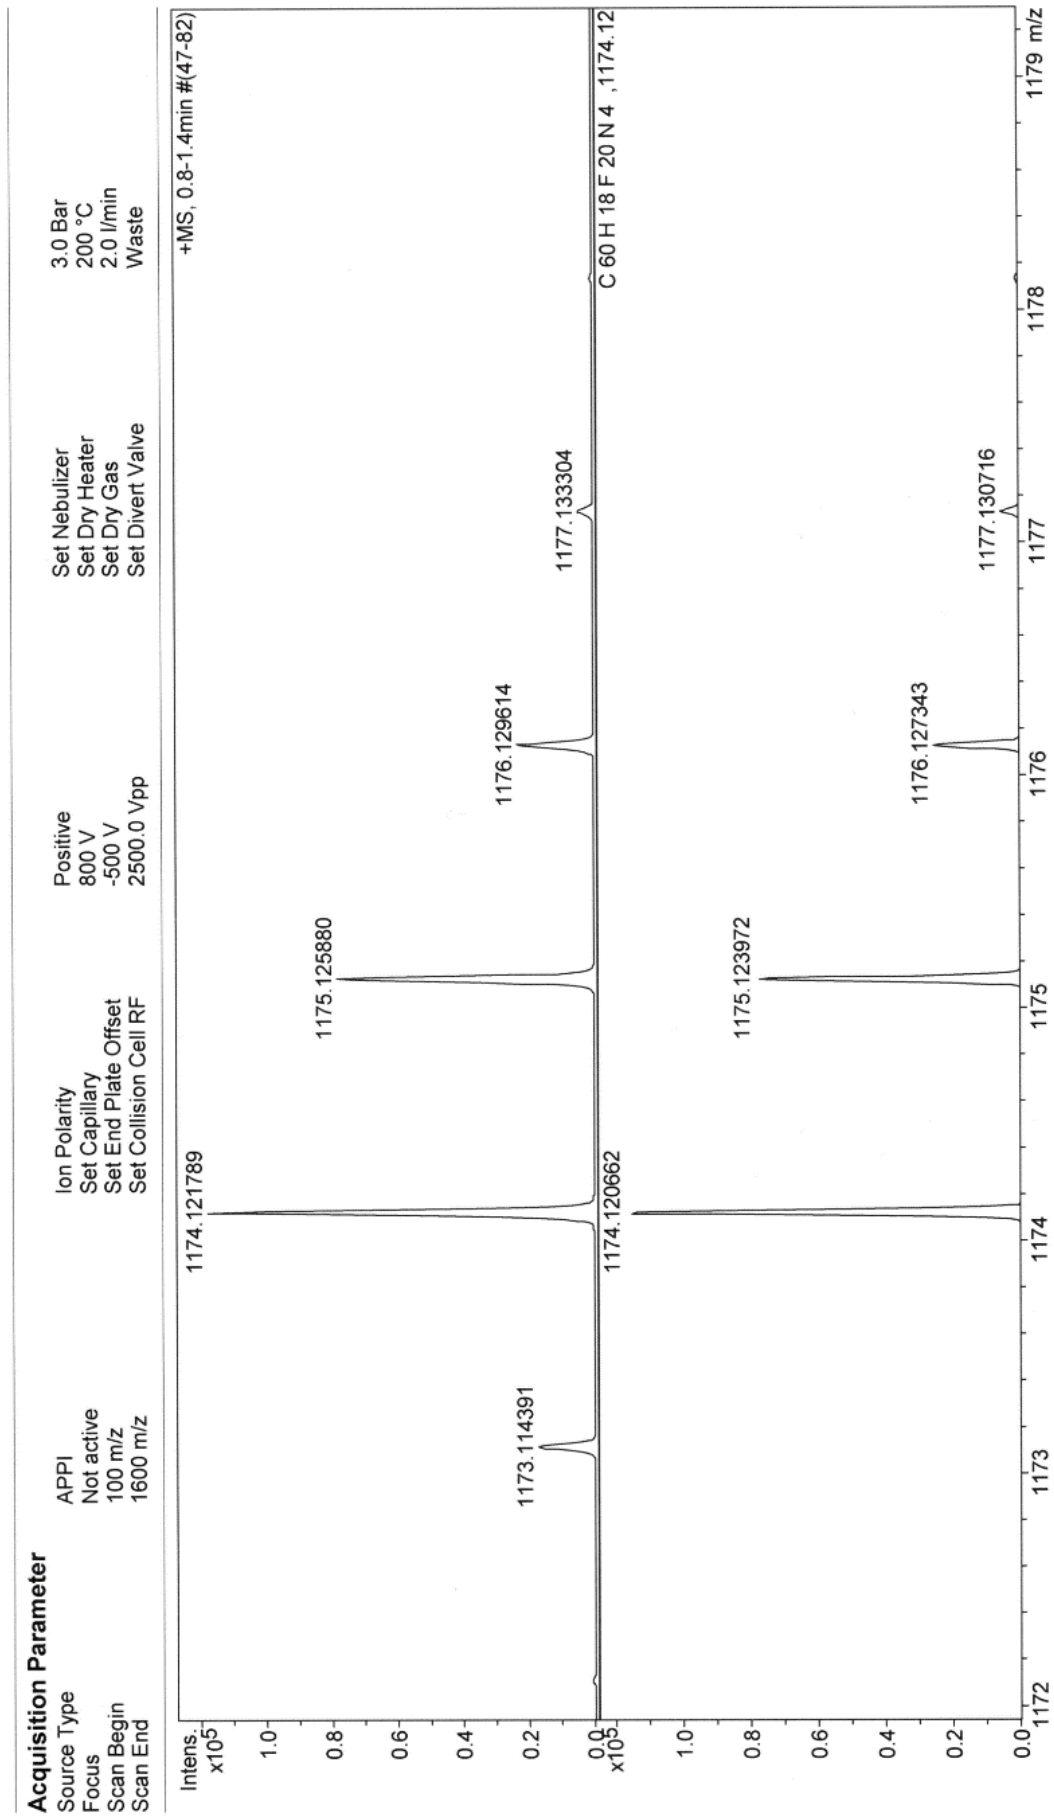

Figure S3. HRMS (APPI, toluene) of 1.

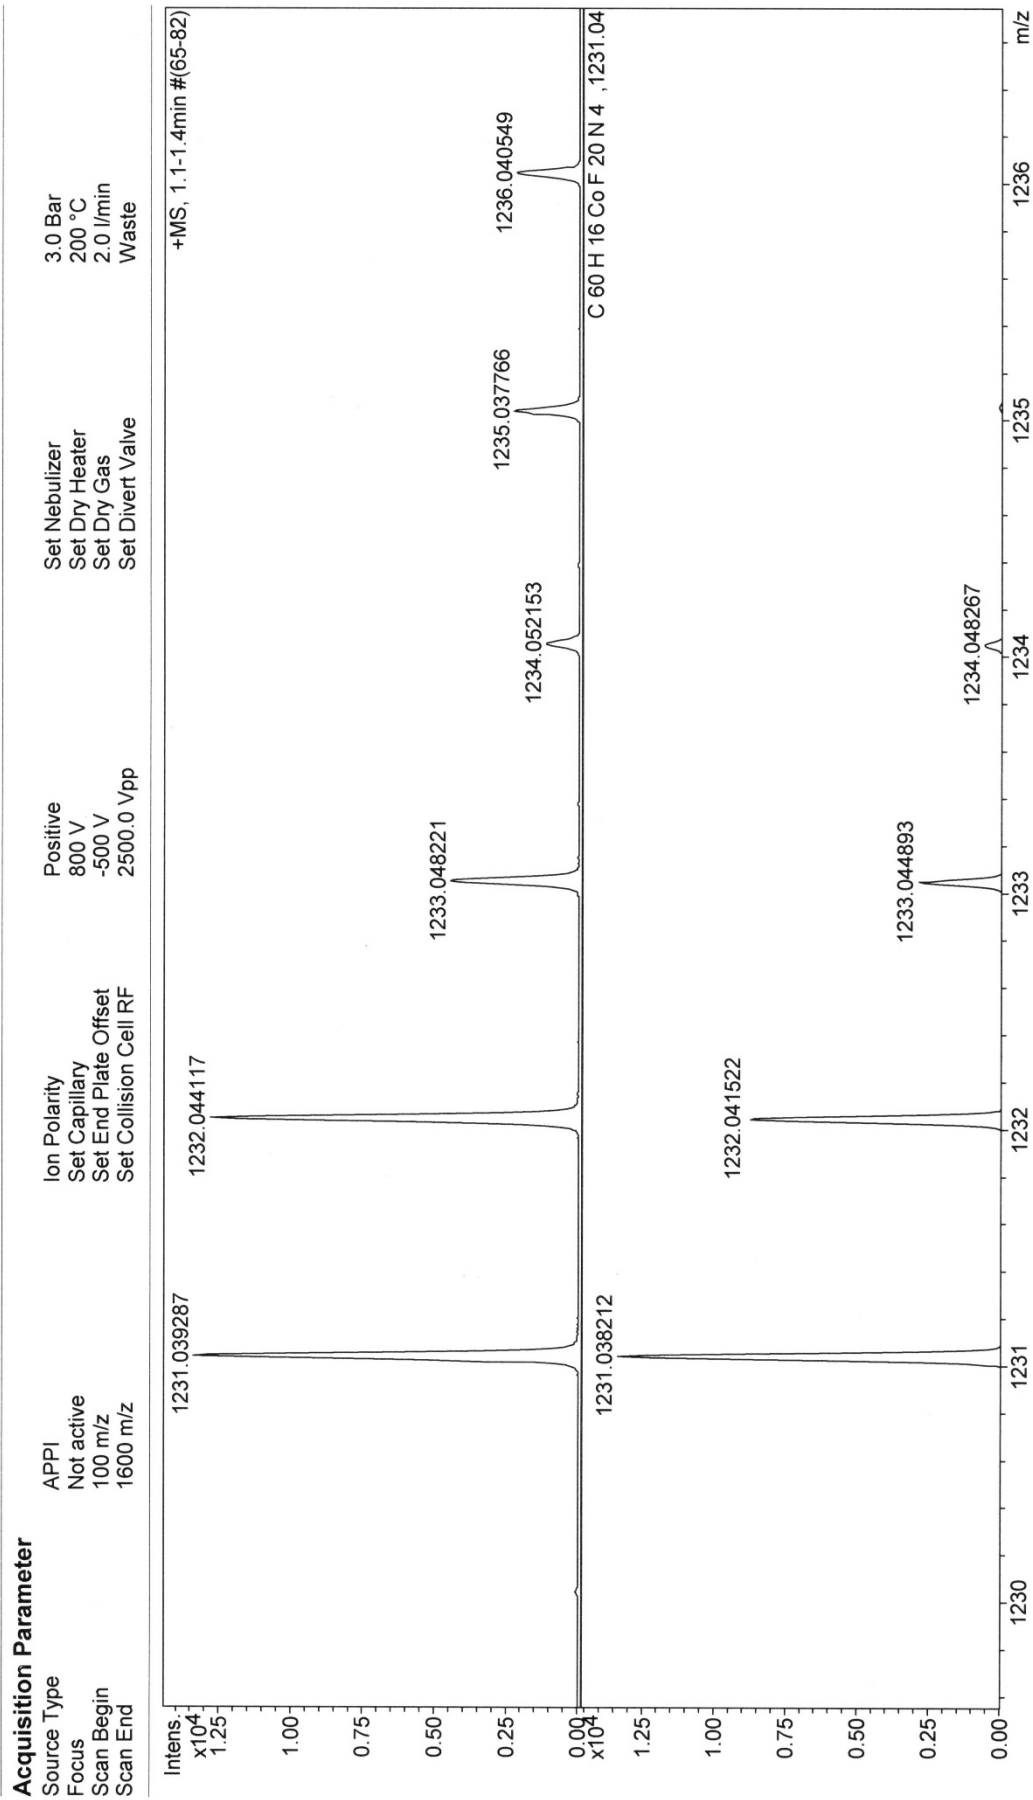

Figure S4. HRMS (APPI, toluene) of 1Co.

### Acquisition Parameter

Source Type APPI  
Focus Not active  
Scan Begin 100 m/z  
Scan End 1600 m/z  
Ion Polarity Positive  
Set Capillary 800 V  
Set End Plate Offset -500 V  
Set Collision Cell RF 2500.0 Vpp  
Set Nebulizer 3.0 Bar  
Set Dry Heater 200 °C  
Set Dry Gas 2.0 l/min  
Set Divert Valve Waste

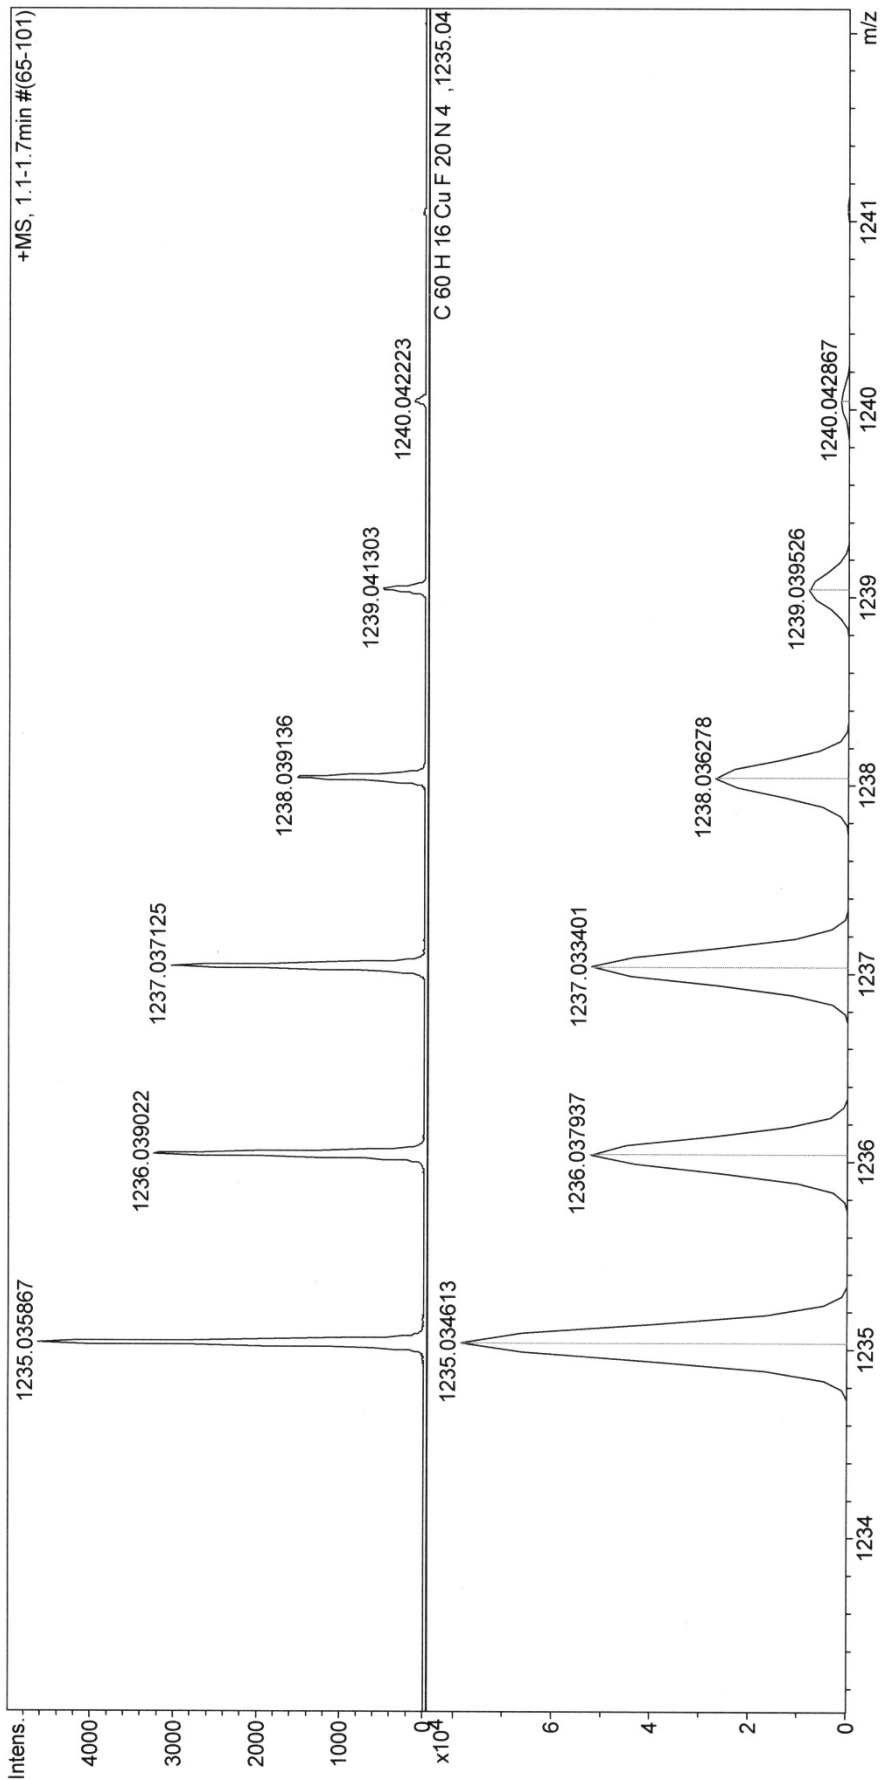

Figure S5. HRMS (APPI, toluene) of 1Cu.

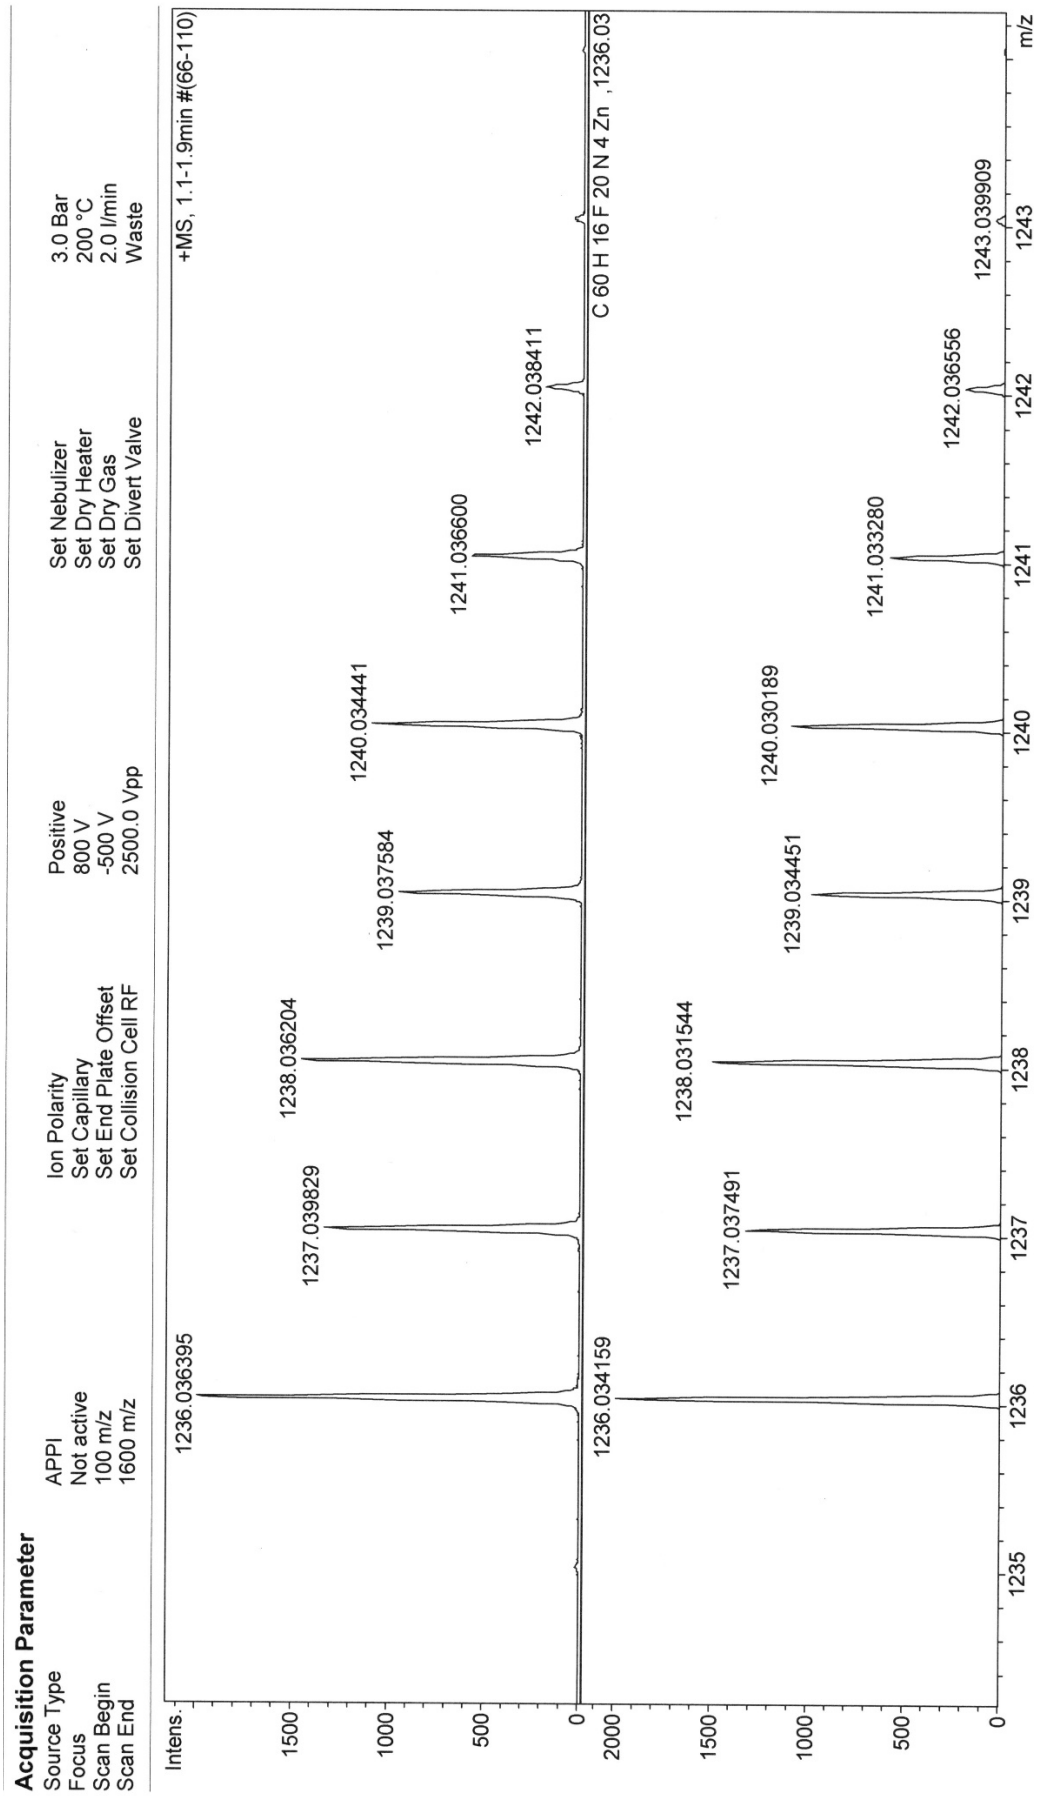

Figure S6. HRMS (APPI, toluene) of 12Zn.

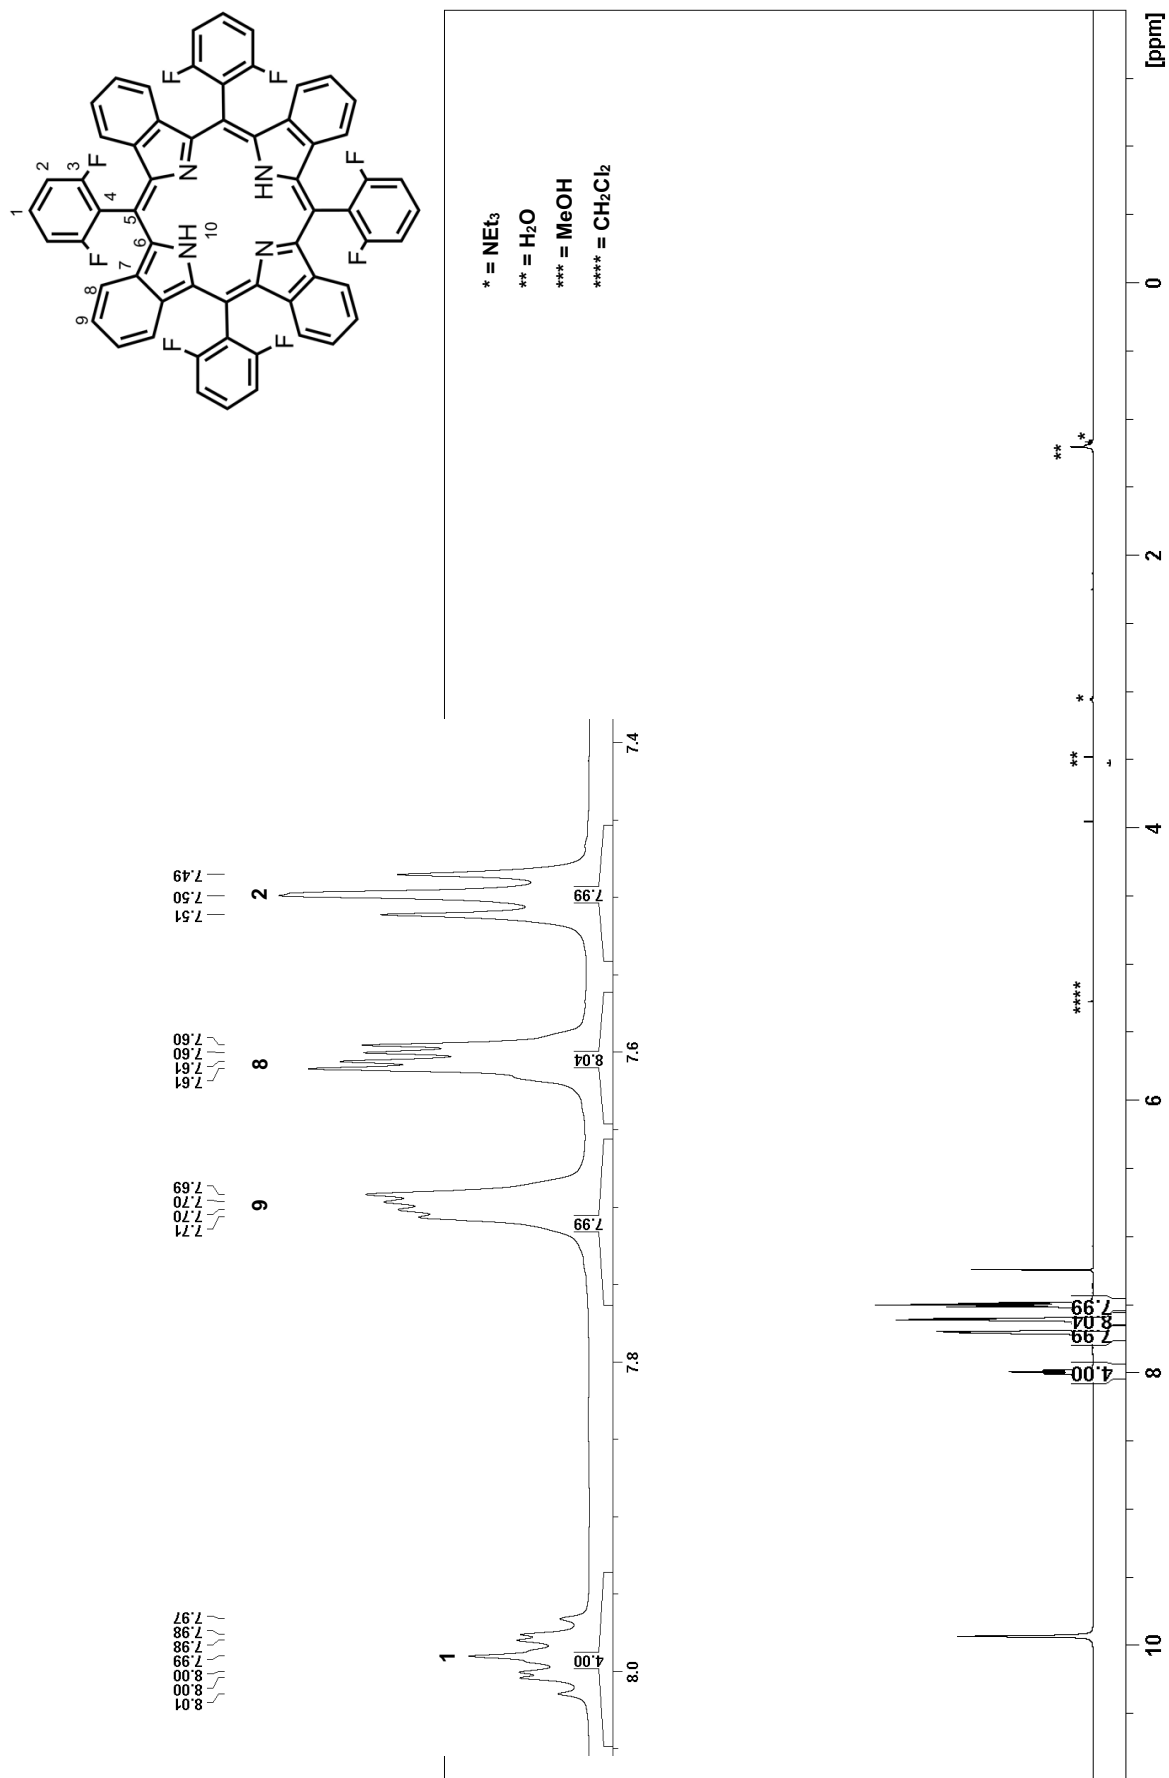

Figure S7.  $^1\text{H}$  NMR (600 MHz,  $\text{CDCl}_3/\text{TFA-d}_1$ , rt) of **2**.



**Acquisition Parameter**

Source Type APPI  
Focus Not active  
Scan Begin 100 m/z  
Scan End 1600 m/z  
Ion Polarity Positive  
Set Capillary 800 V  
Set End Plate Offset -500 V  
Set Collision Cell RF 2500.0 Vpp  
Set Nebulizer 3.0 Bar  
Set Dry Heater 200 °C  
Set Dry Gas 2.0 l/min  
Set Divert Valve Waste

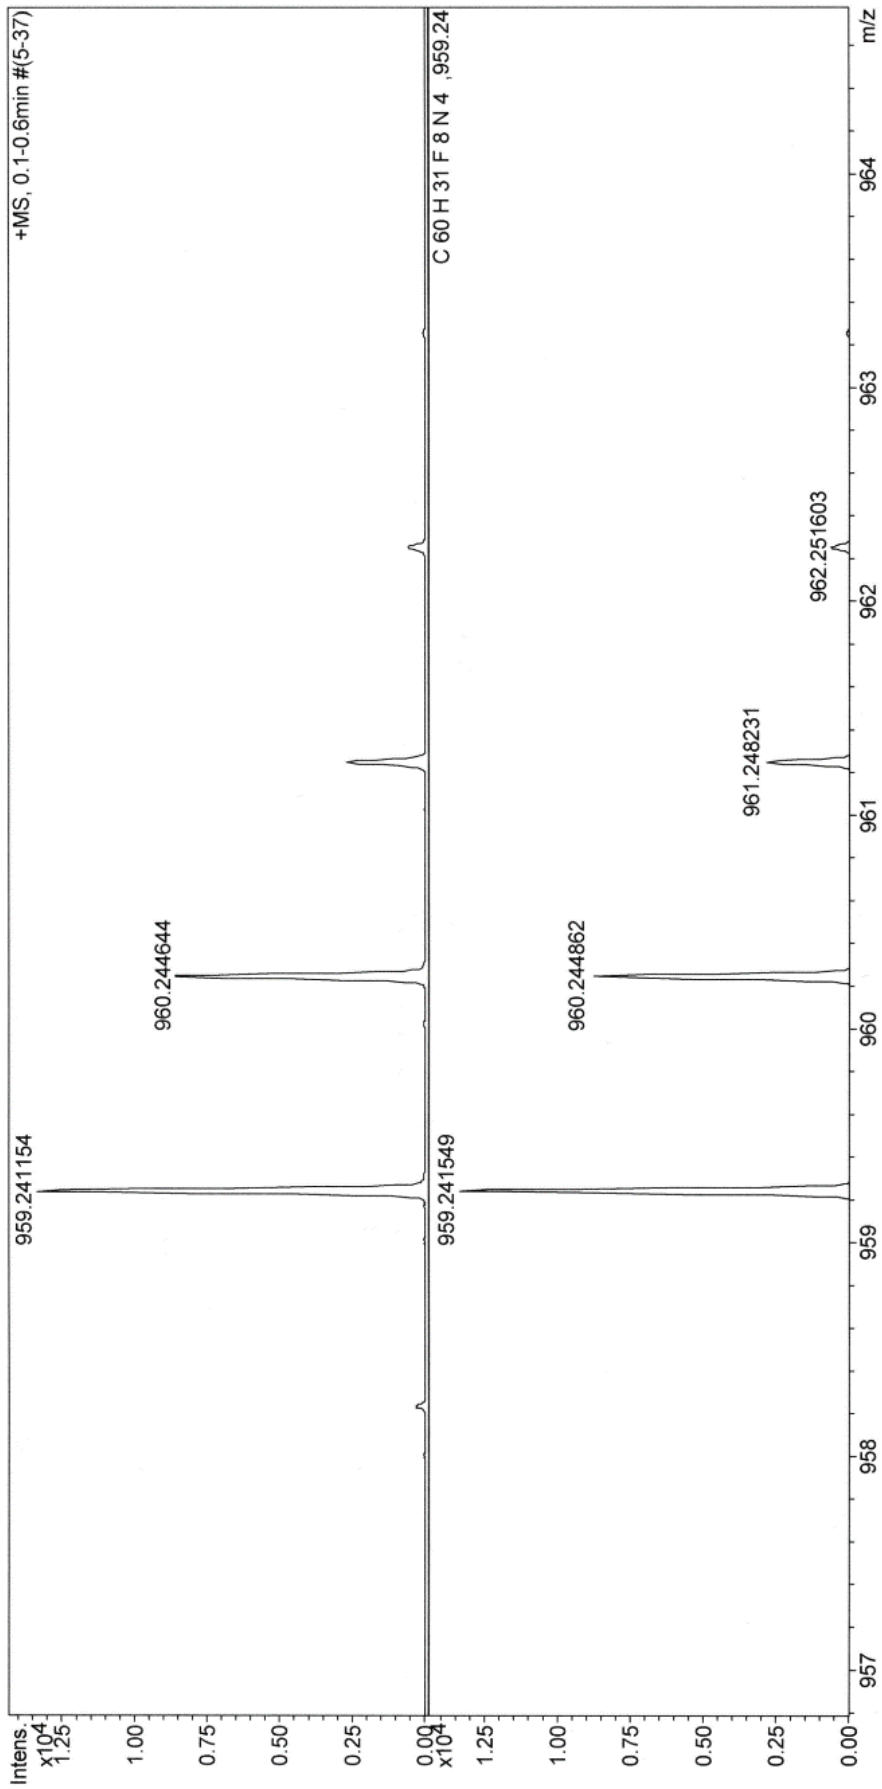

Figure S8. HRMS (APPI, THF) of 2.

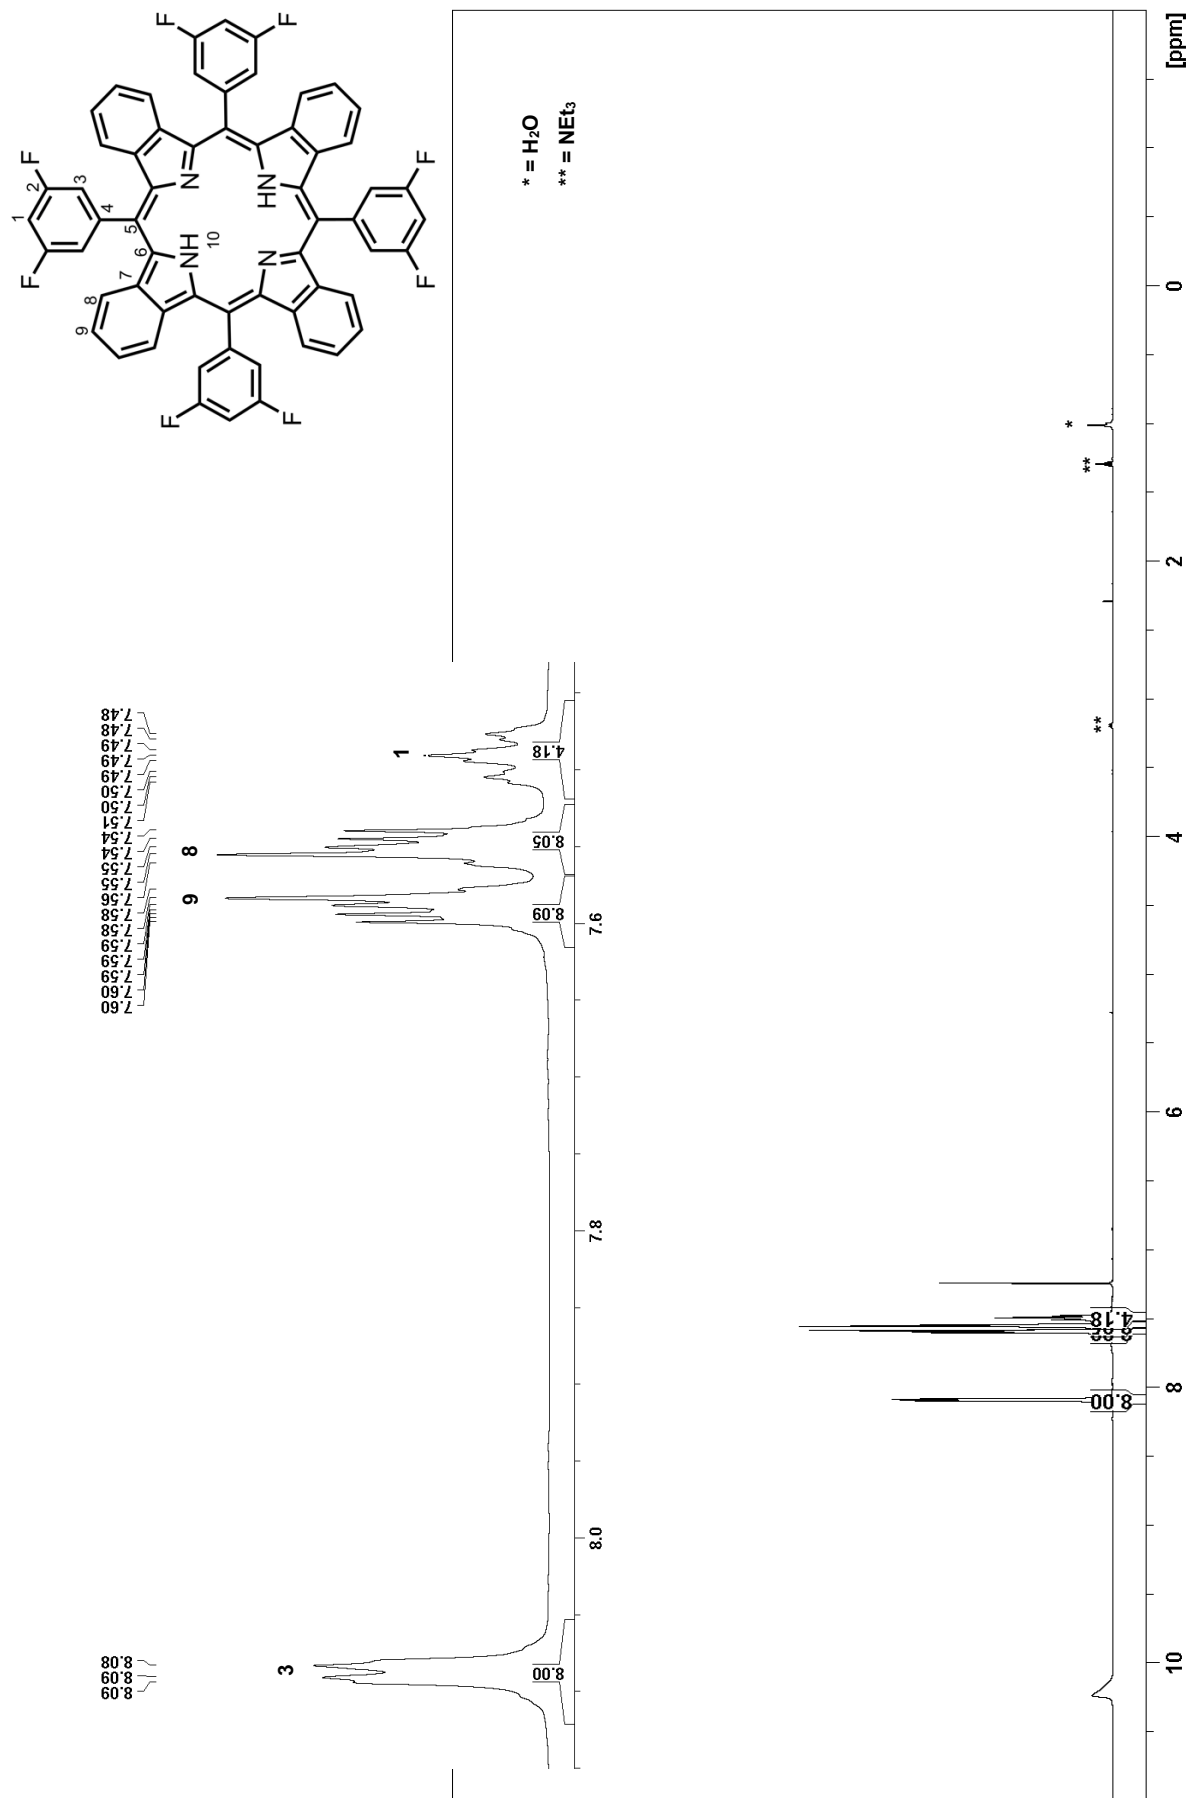

Figure S9.  $^1\text{H}$  NMR (600 MHz,  $\text{CDCl}_3/\text{TFA-d}_1$ , rt) of **3**.

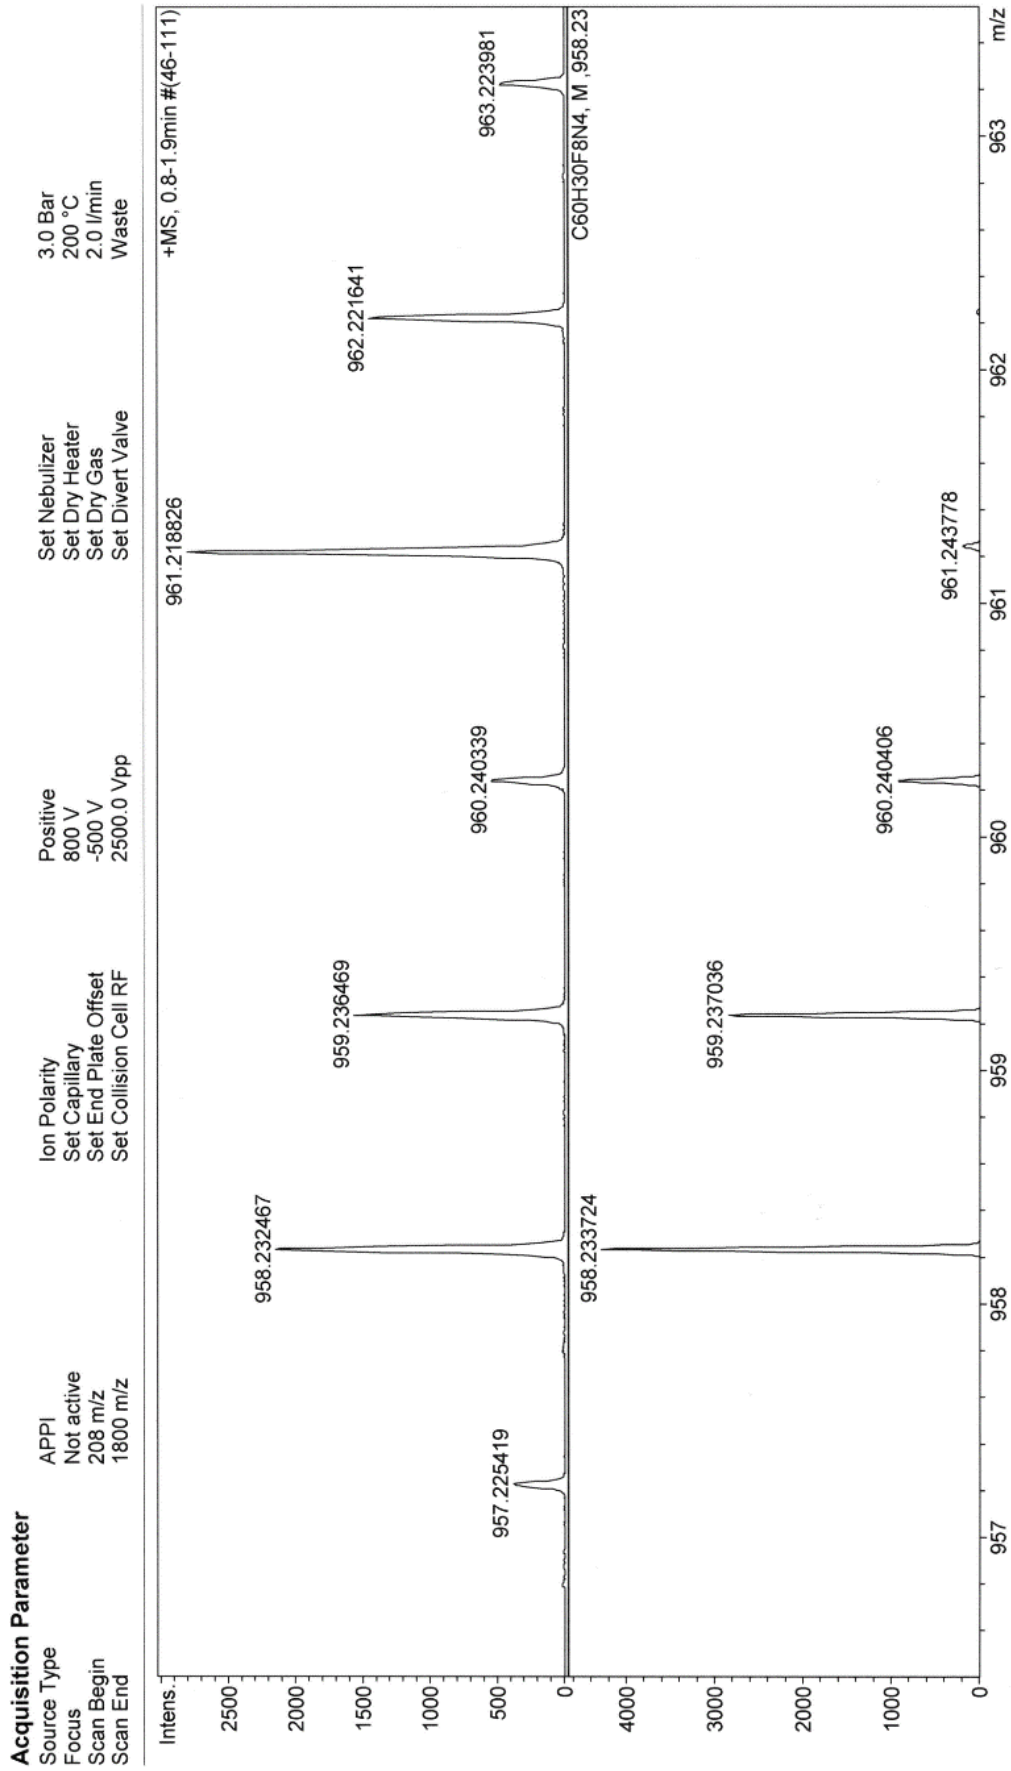

Figure S10. HRMS (APPI, toluene) of **3**.

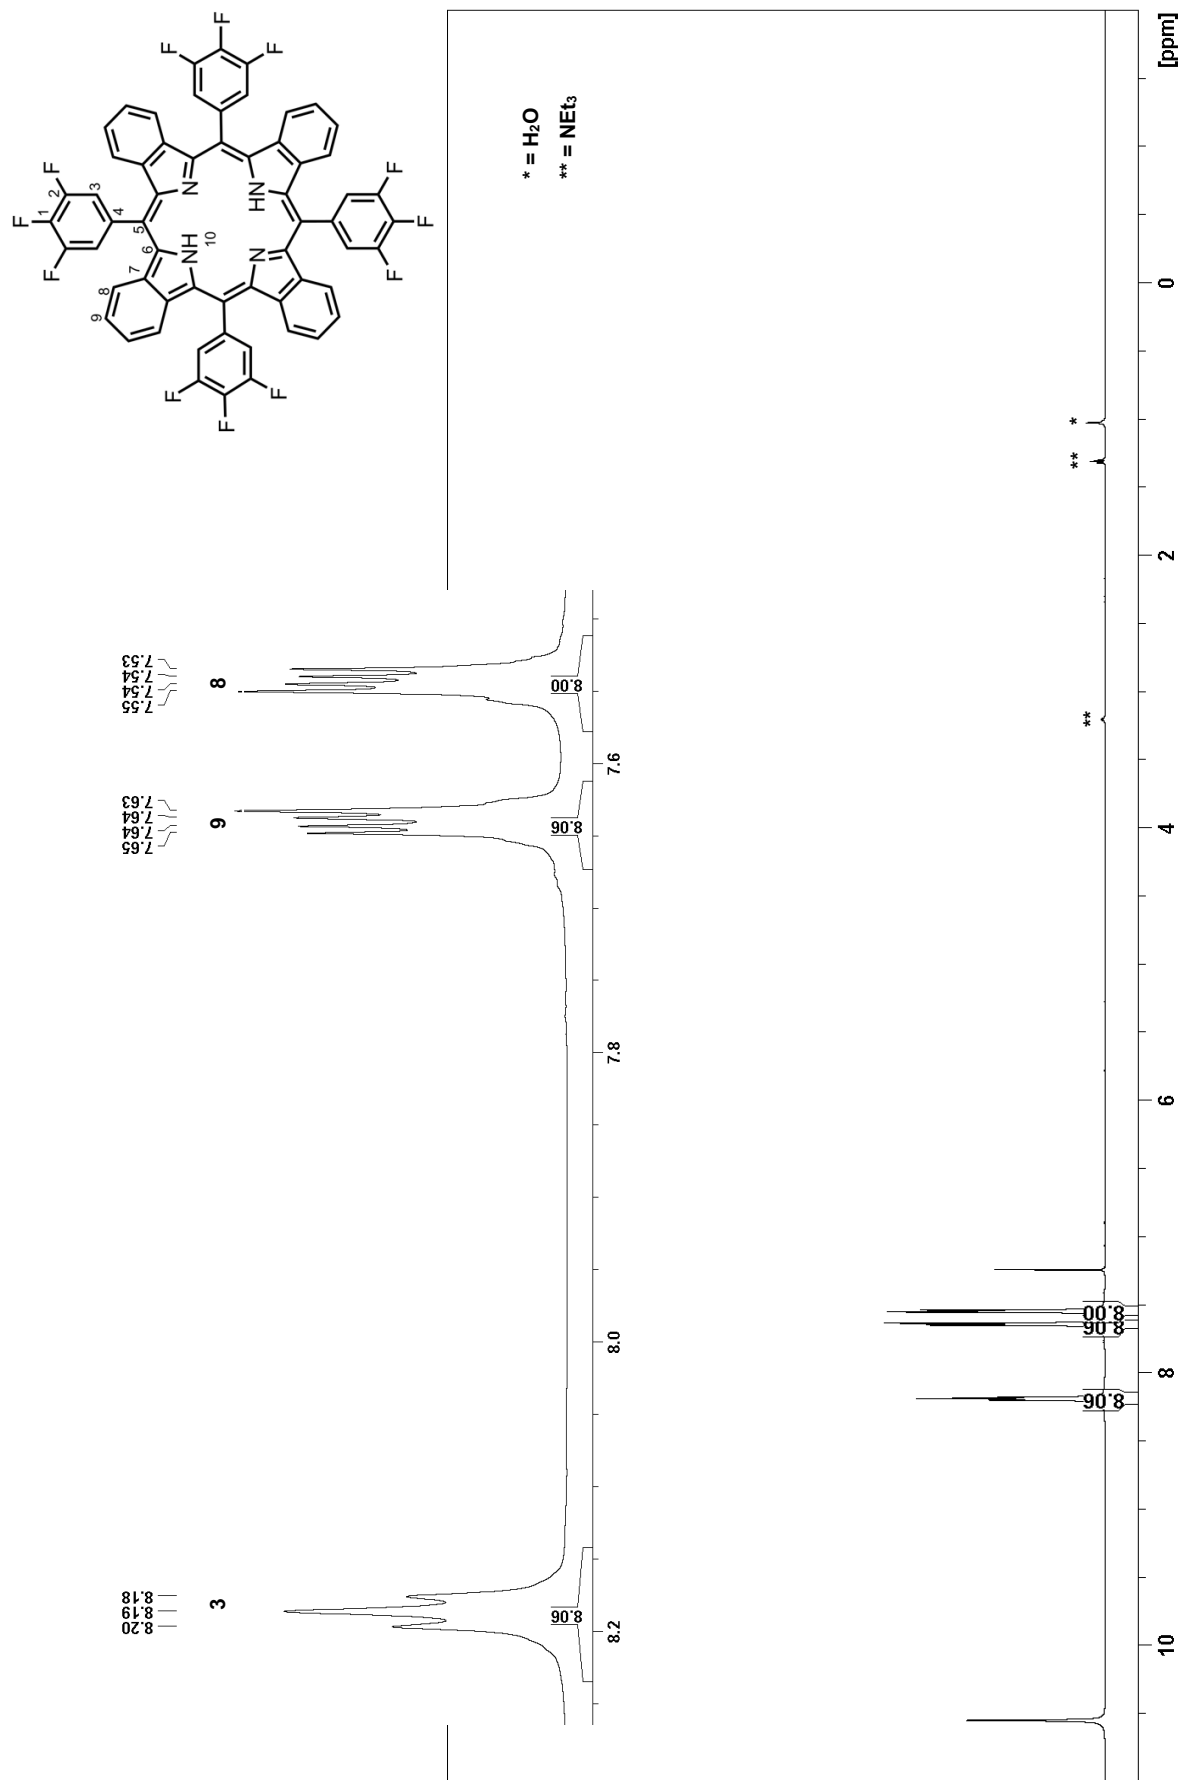

Figure S11. <sup>1</sup>H NMR (600 MHz, CDCl<sub>3</sub>/TFA-d<sub>1</sub>, rt) of 4.

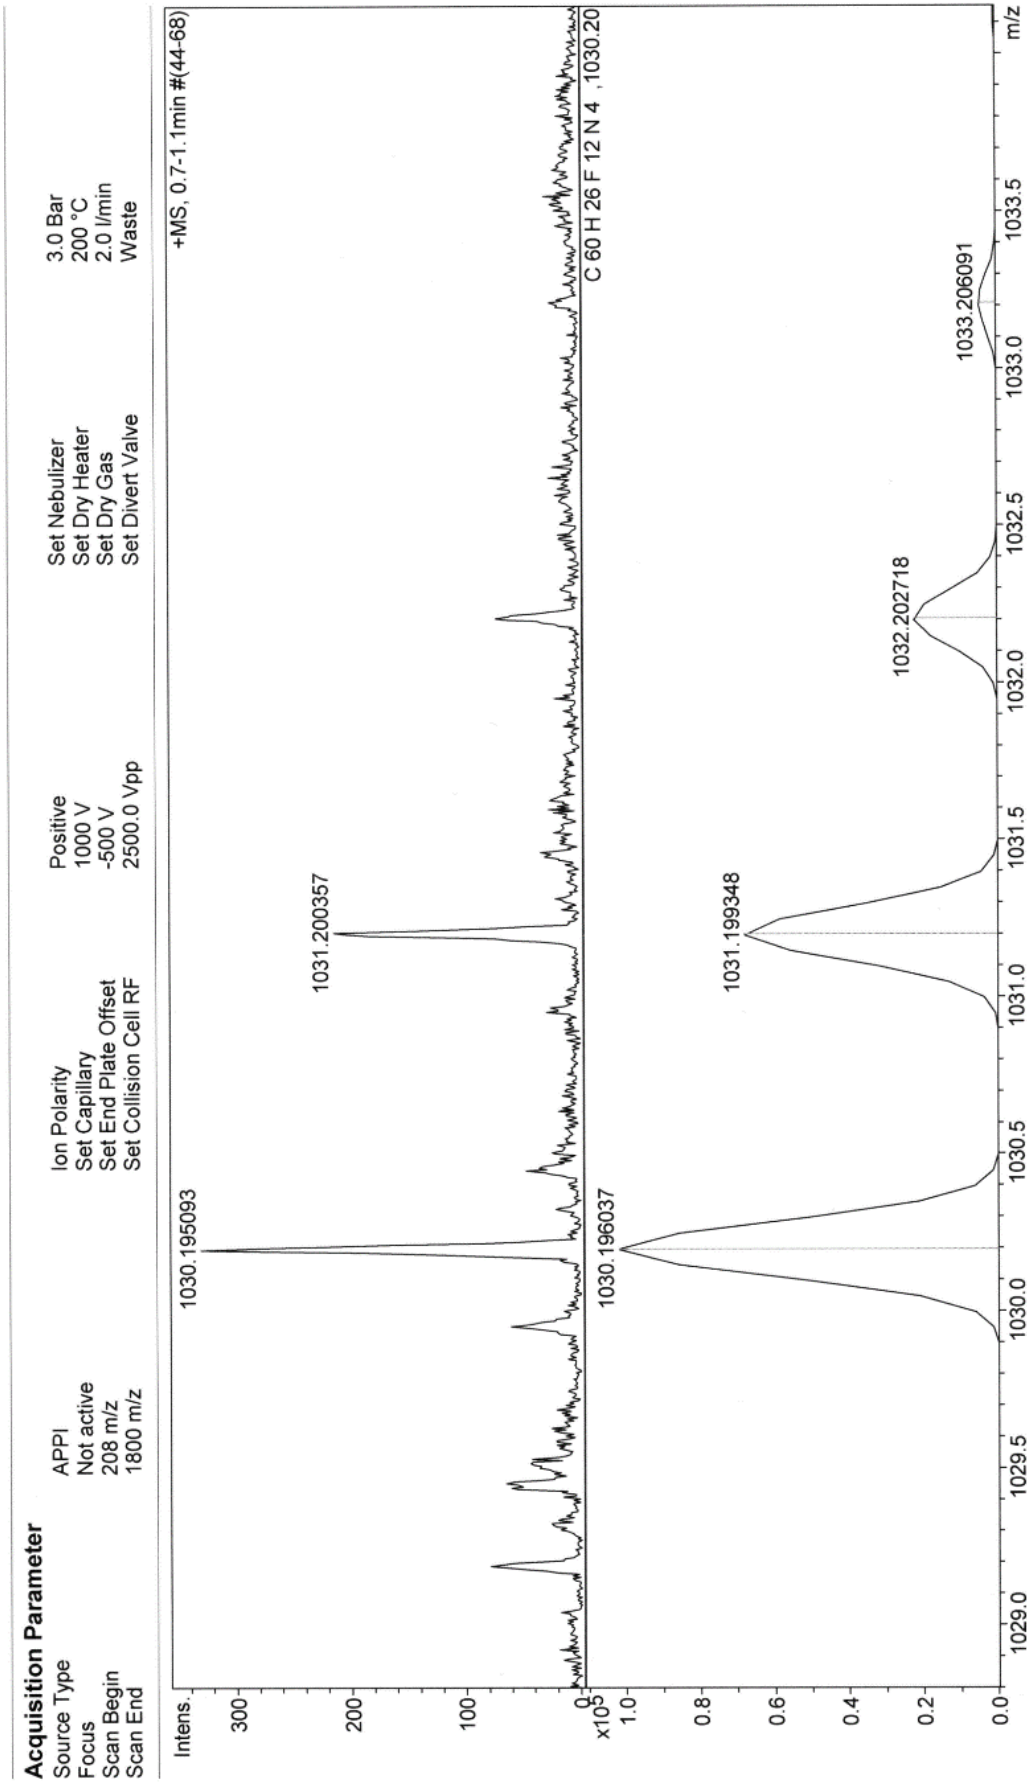

Figure S12. HRMS (APPI, toluene) of 4.

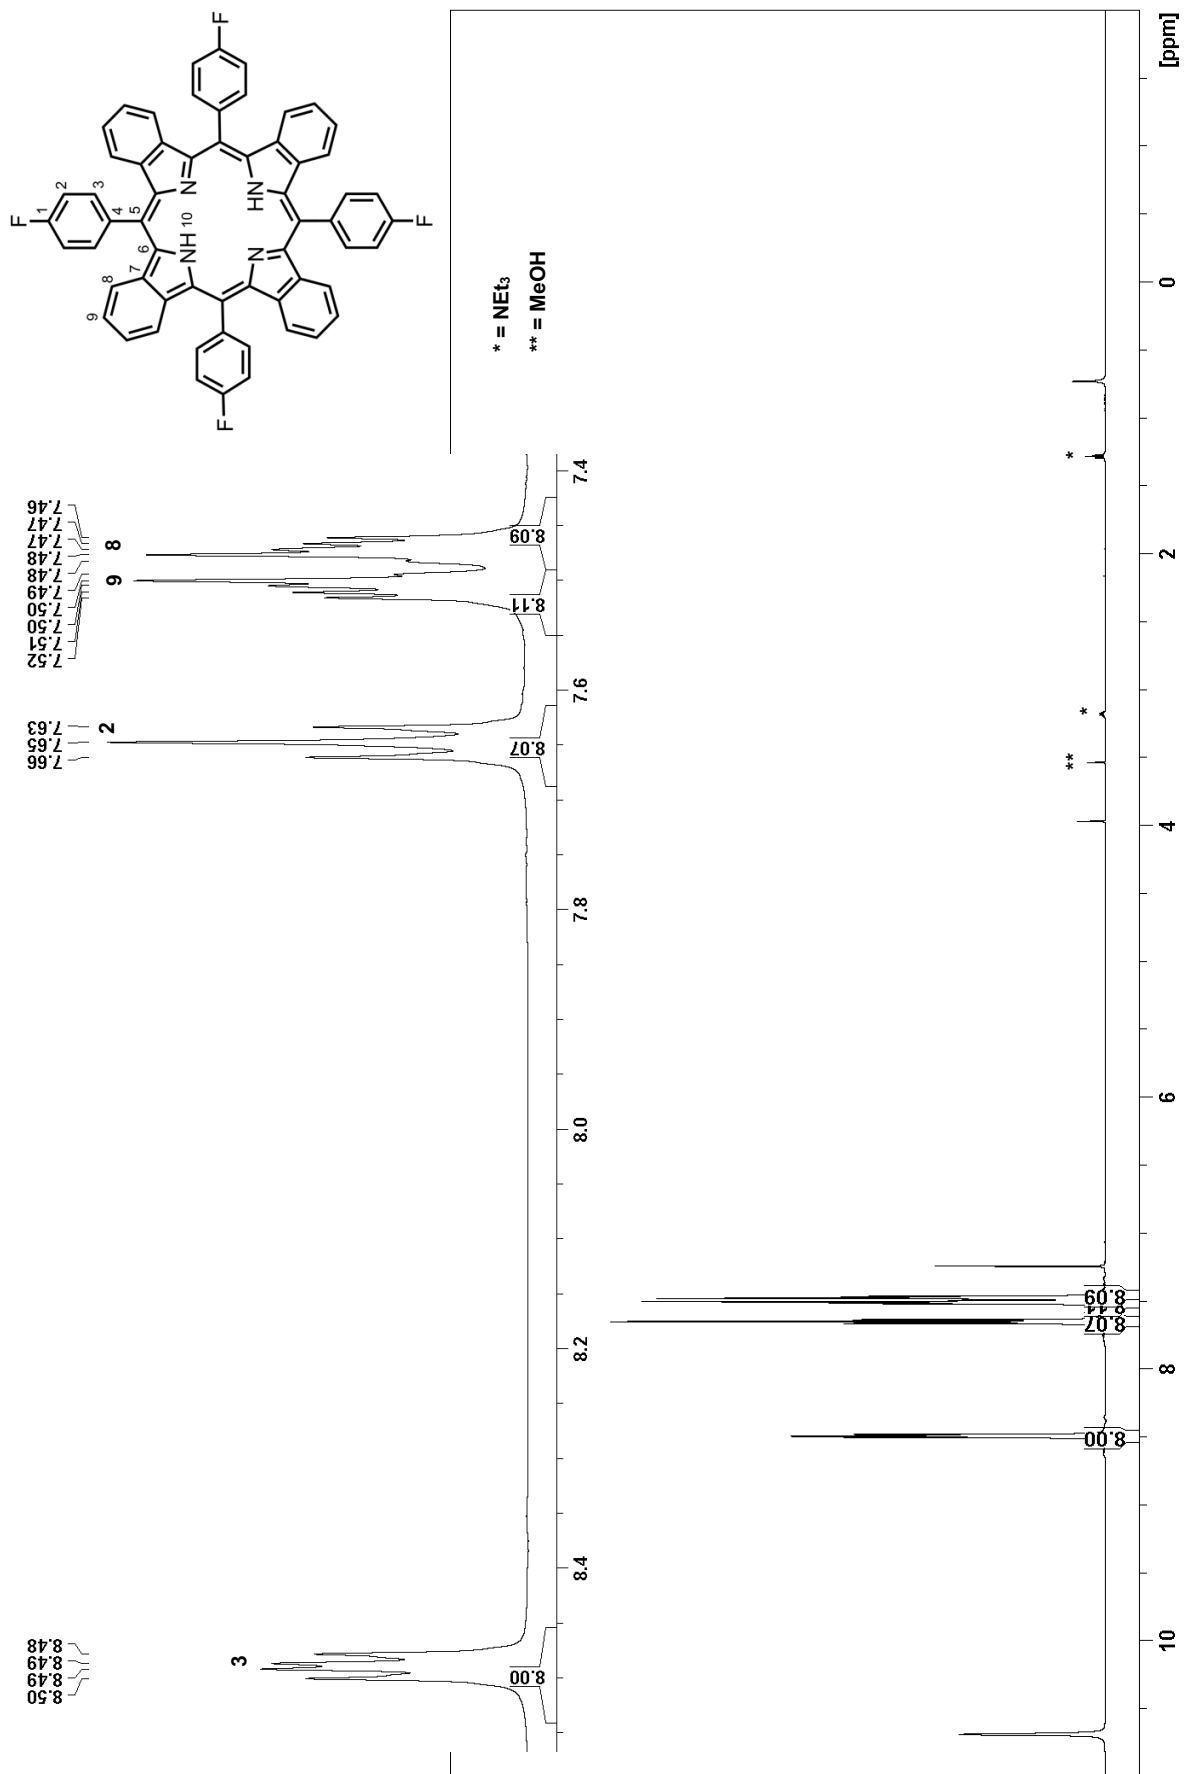

Figure S13.  $^1\text{H}$  NMR (600 MHz,  $\text{CDCl}_3/\text{TFA-d}_1$ , rt) of **5**.

**Acquisition Parameter**

|             |            |                       |            |                  |           |
|-------------|------------|-----------------------|------------|------------------|-----------|
| Source Type | APPI       | Ion Polarity          | Positive   | Set Nebulizer    | 3.0 Bar   |
| Focus       | Not active | Set Capillary         | 800 V      | Set Dry Heater   | 200 °C    |
| Scan Begin  | 100 m/z    | Set End Plate Offset  | -500 V     | Set Dry Gas      | 2.0 l/min |
| Scan End    | 1600 m/z   | Set Collision Cell RF | 2500.0 Vpp | Set Divert Valve | Waste     |

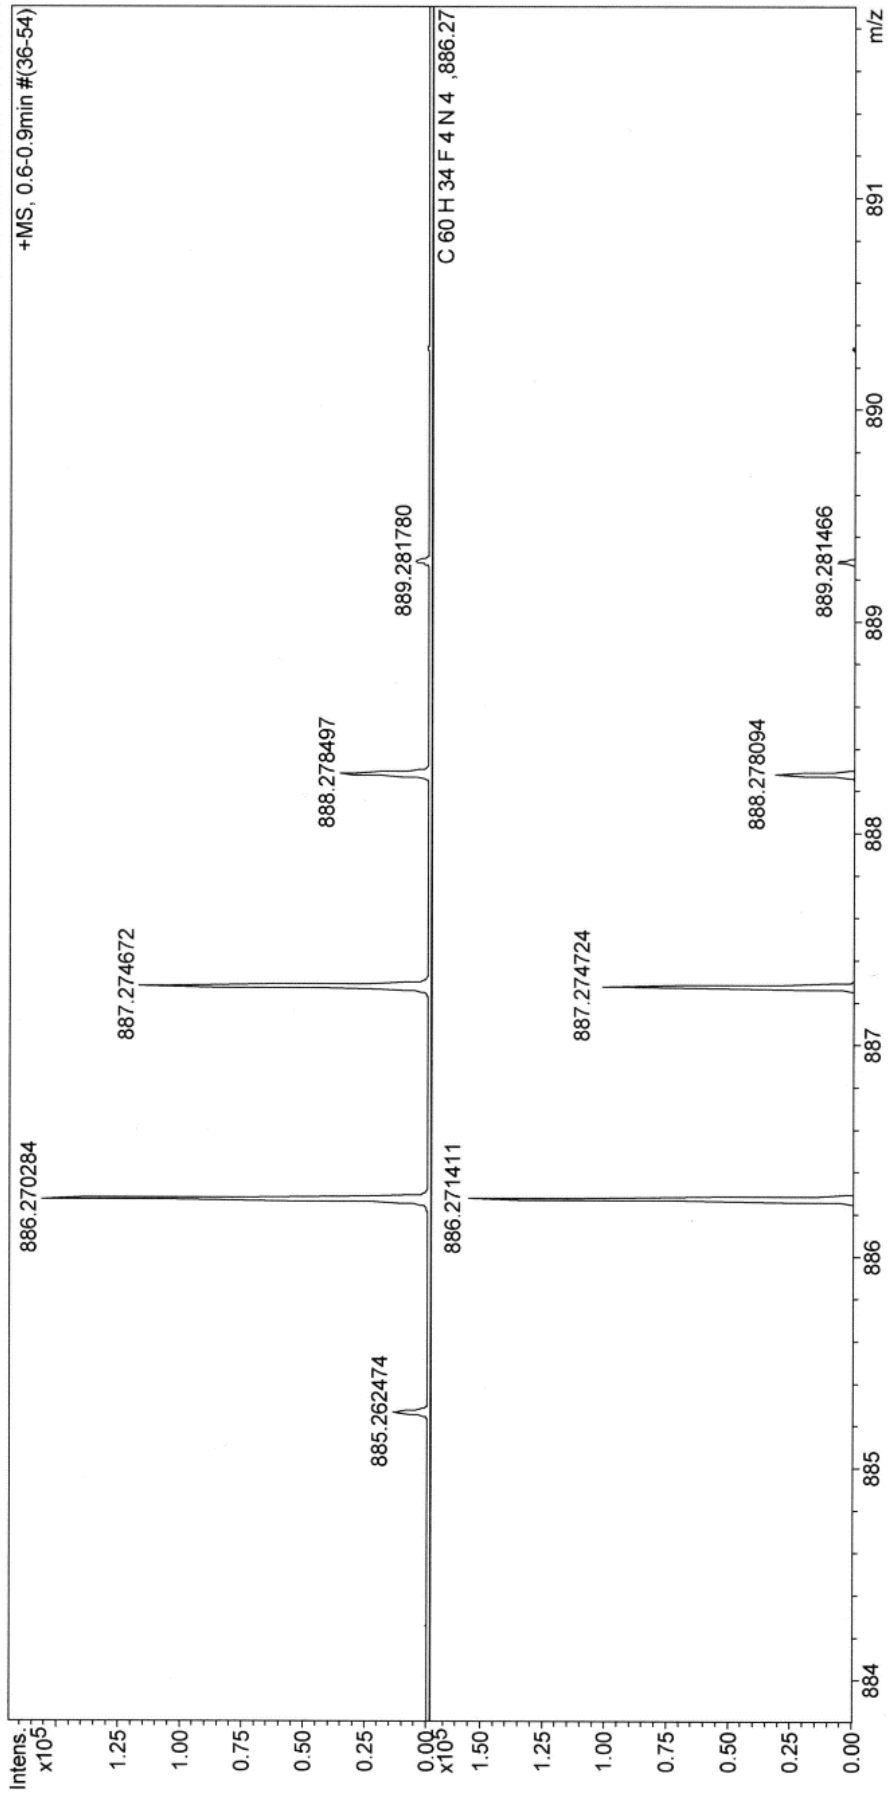

Figure S14. HRMS (APPI, MeCN/toluene) of 5.

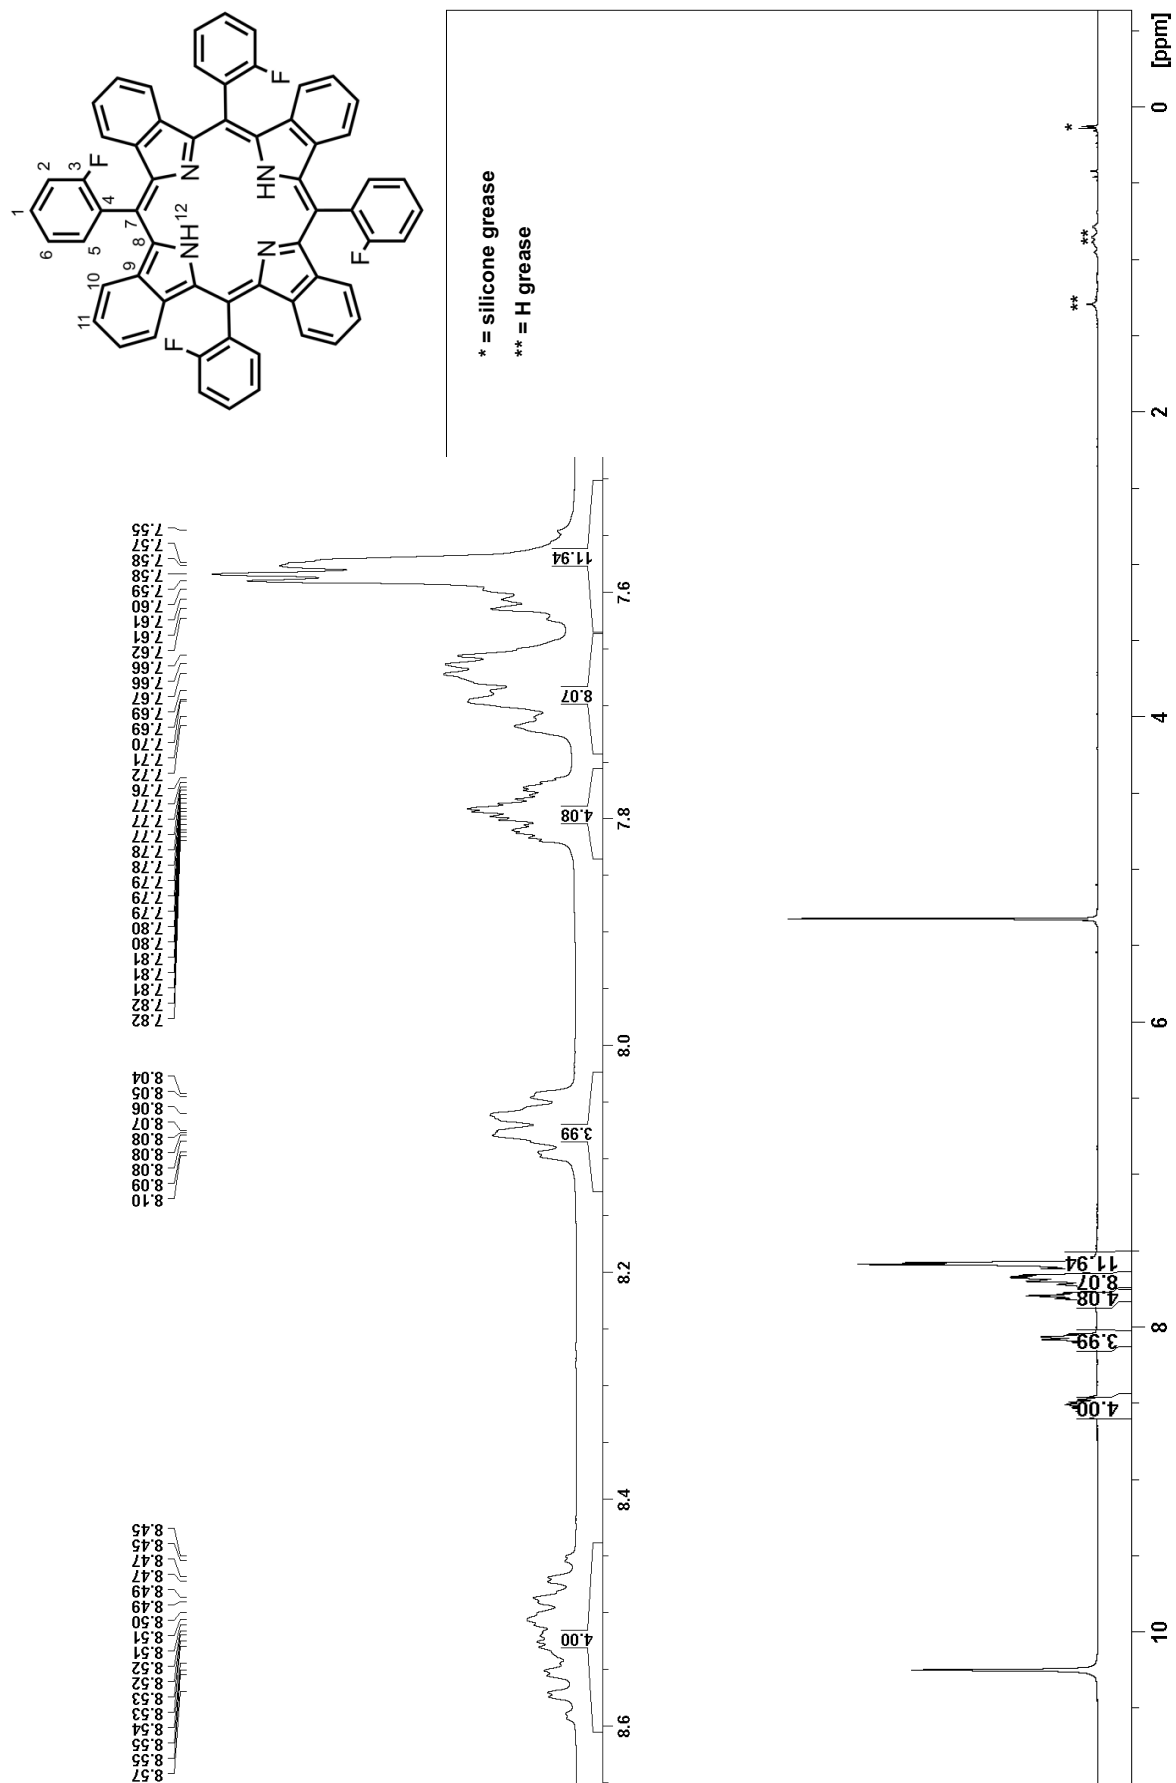

Figure S15. <sup>1</sup>H NMR (400 MHz, CD<sub>2</sub>Cl<sub>2</sub>/TFA-d<sub>1</sub>, rt) of **6** (mixture of four atropisomers).



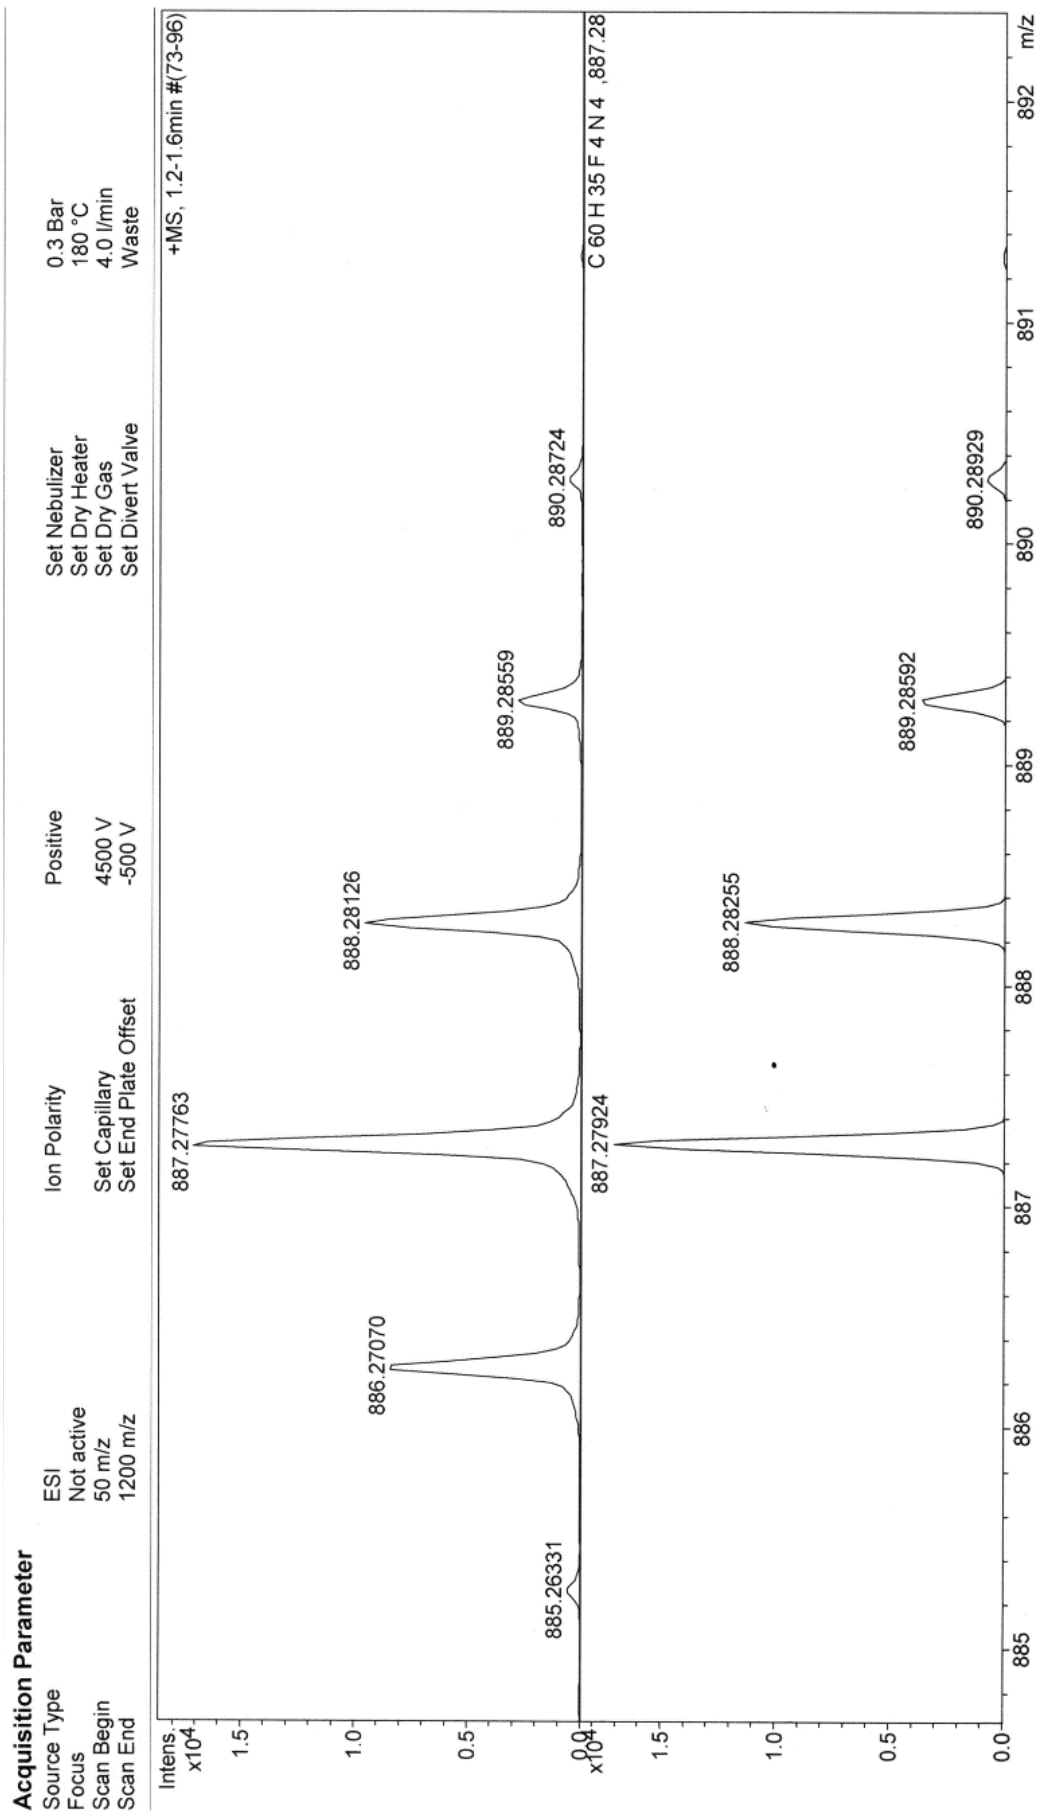

Figure S16. HRMS (ESI, MeCN/toluene) of 6.

# Display Report

**Analysis Info**  
 Analysis Name: D:\Data\Lux-2015-Lungerich-dl153-Pt-.d  
 Method: tune\_pos\_200\_1250.m  
 Sample Name: CH2Cl2 ACN  
 Comment: 10364  
 Acquisition Date: 5/11/2015 1:22:44 PM  
 Operator: MD  
 Instrument / Ser#: microTOF

**Acquisition Parameter**  
 Source Type: ESI  
 Focus: Active  
 Scan Begin: 200 m/z  
 Scan End: 1600 m/z  
 Ion Polarity: Positive  
 Set Nebulizer: 0.3 Bar  
 Set Dry Heater: 180 °C  
 Set Dry Gas: 4.0 l/min  
 Set Divert Valve: Waste

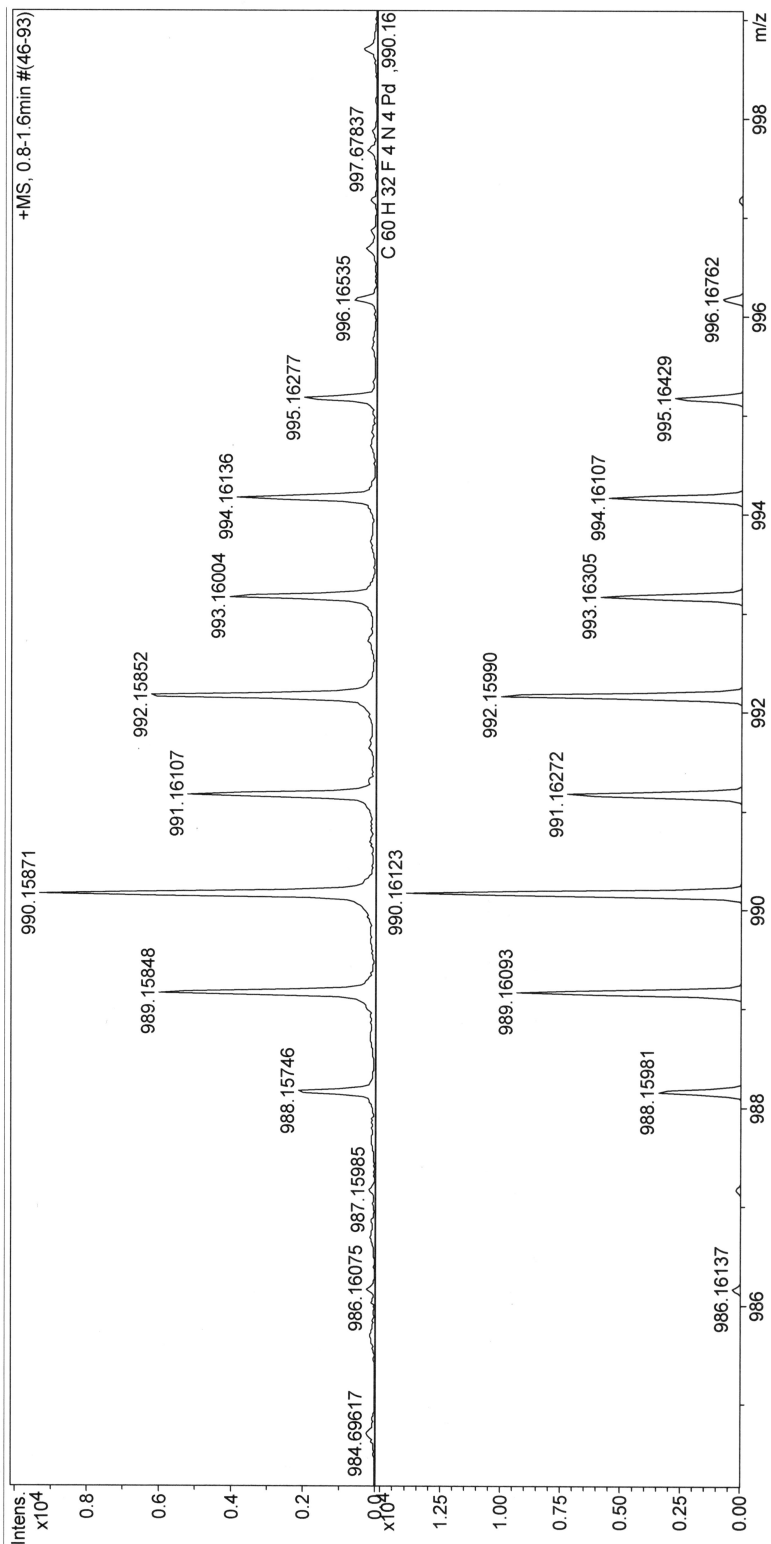

Figure S17. HRMS (ESI, CH<sub>2</sub>Cl<sub>2</sub>/MeCN) of 6Pd.

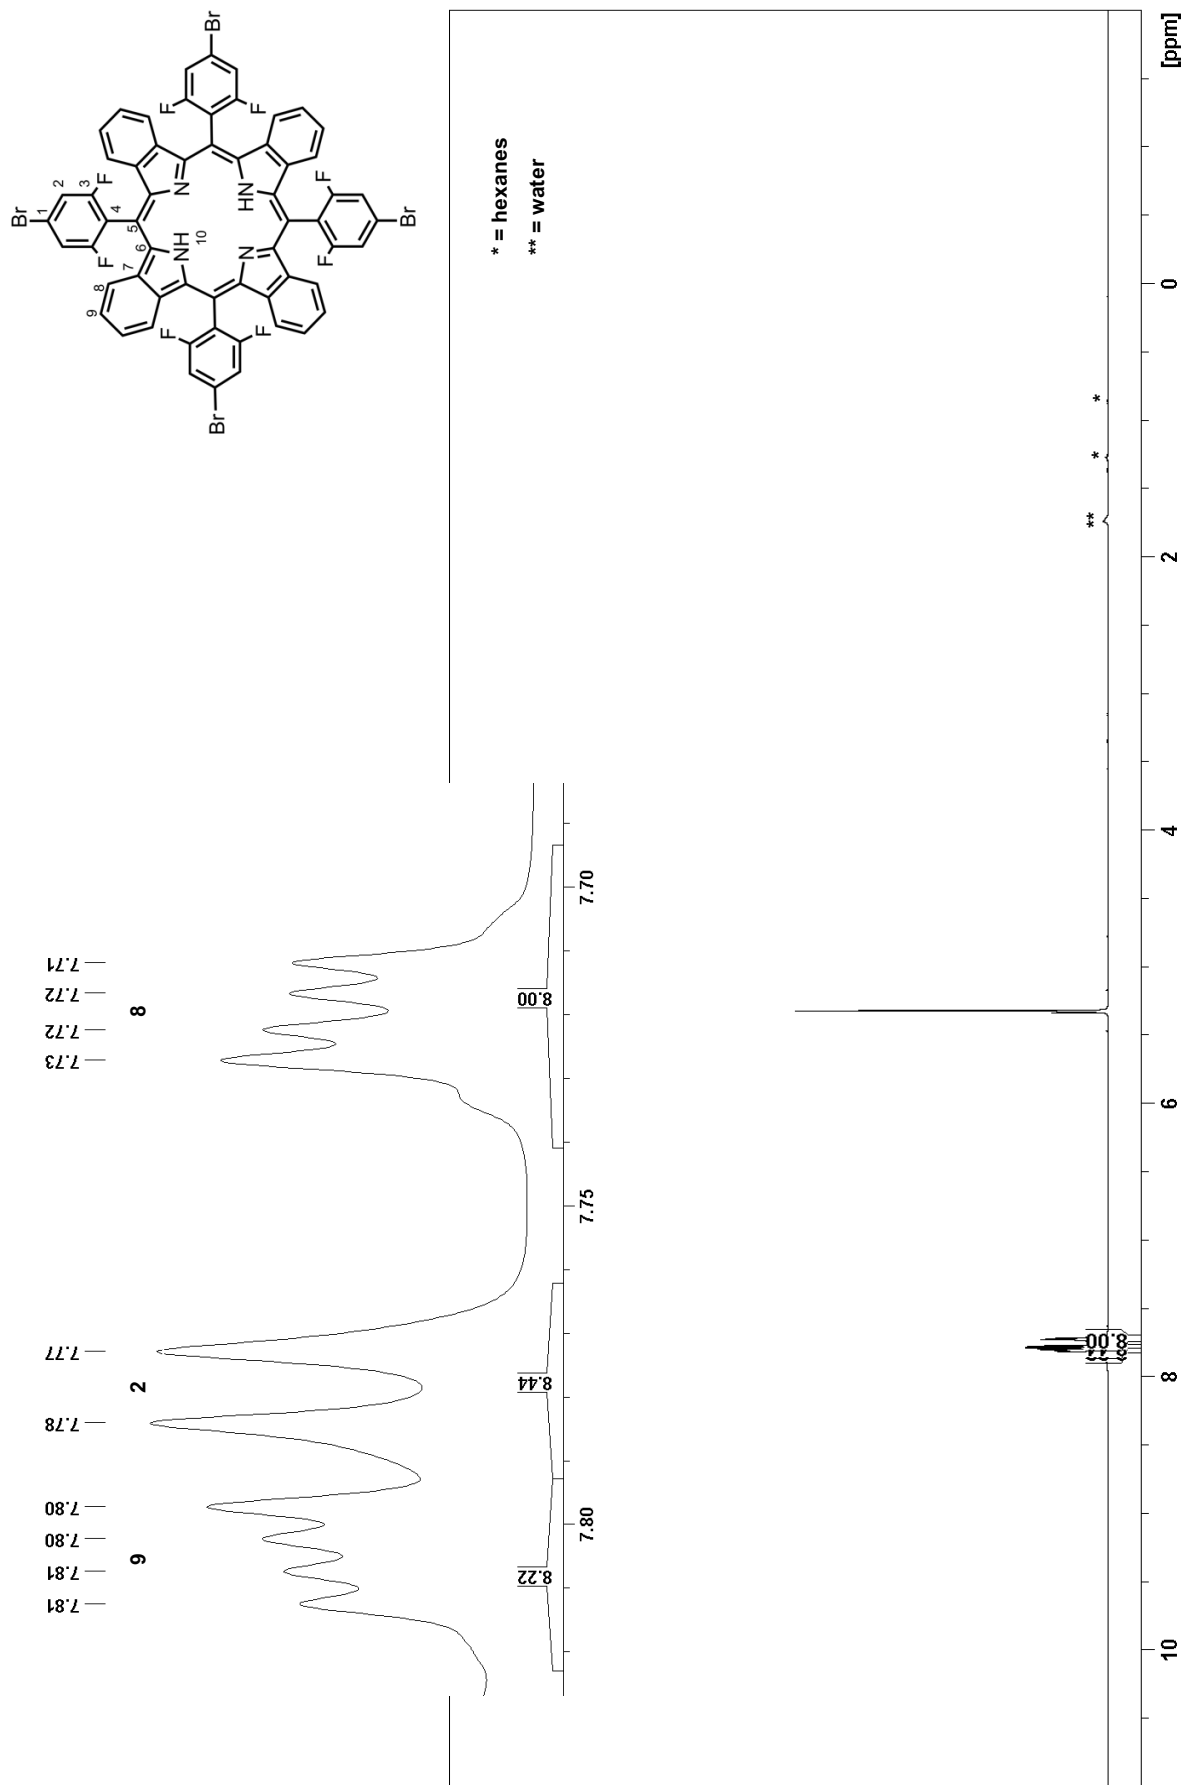

Figure S18.  $^1\text{H NMR}$  (600 MHz,  $\text{CD}_2\text{Cl}_2/\text{TFA-d}_1$ , rt) of 7.

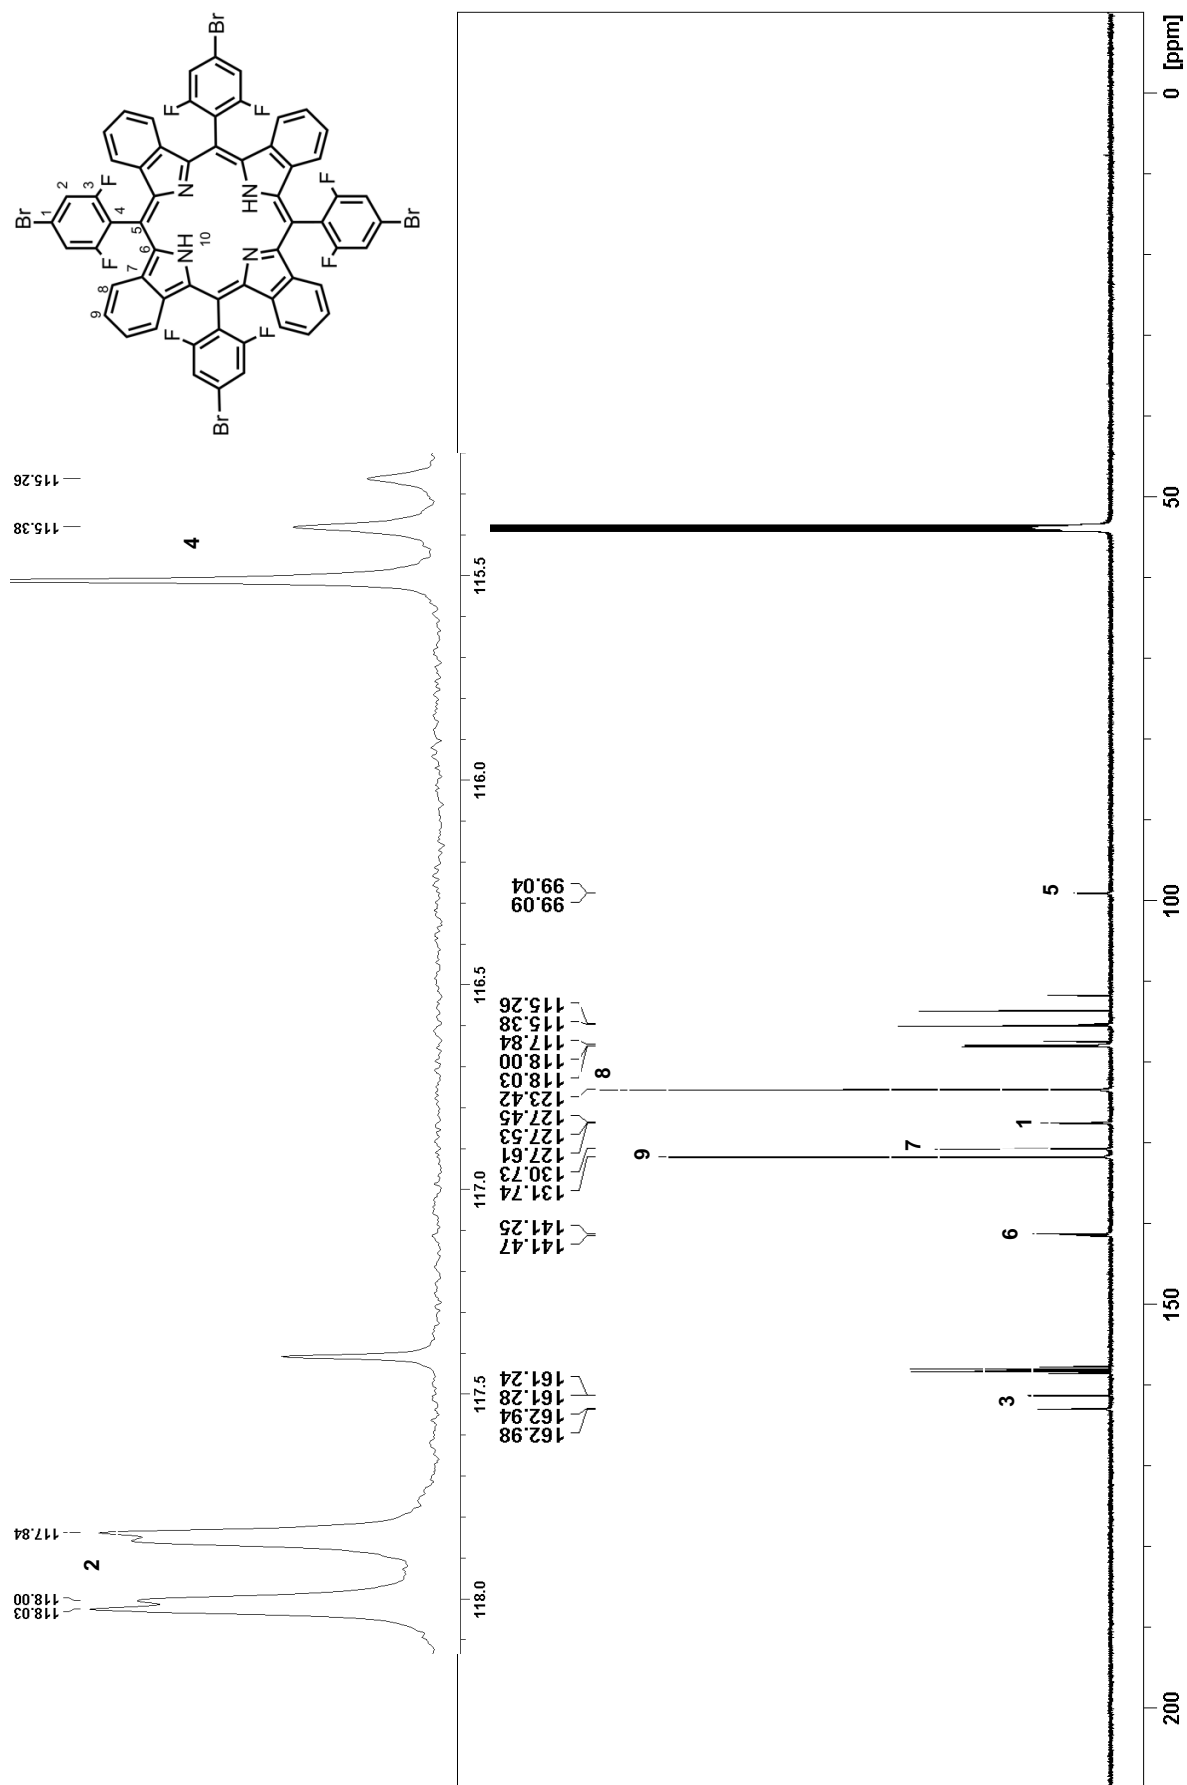

Figure S19.  $^{13}\text{C}\{^1\text{H}\}$  NMR (150 MHz,  $\text{CD}_2\text{Cl}_2/\text{TFA-d}_1$ , rt) of 7.

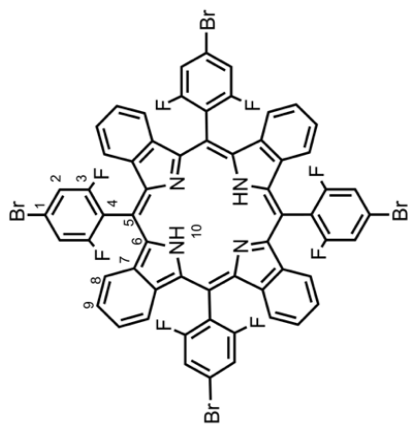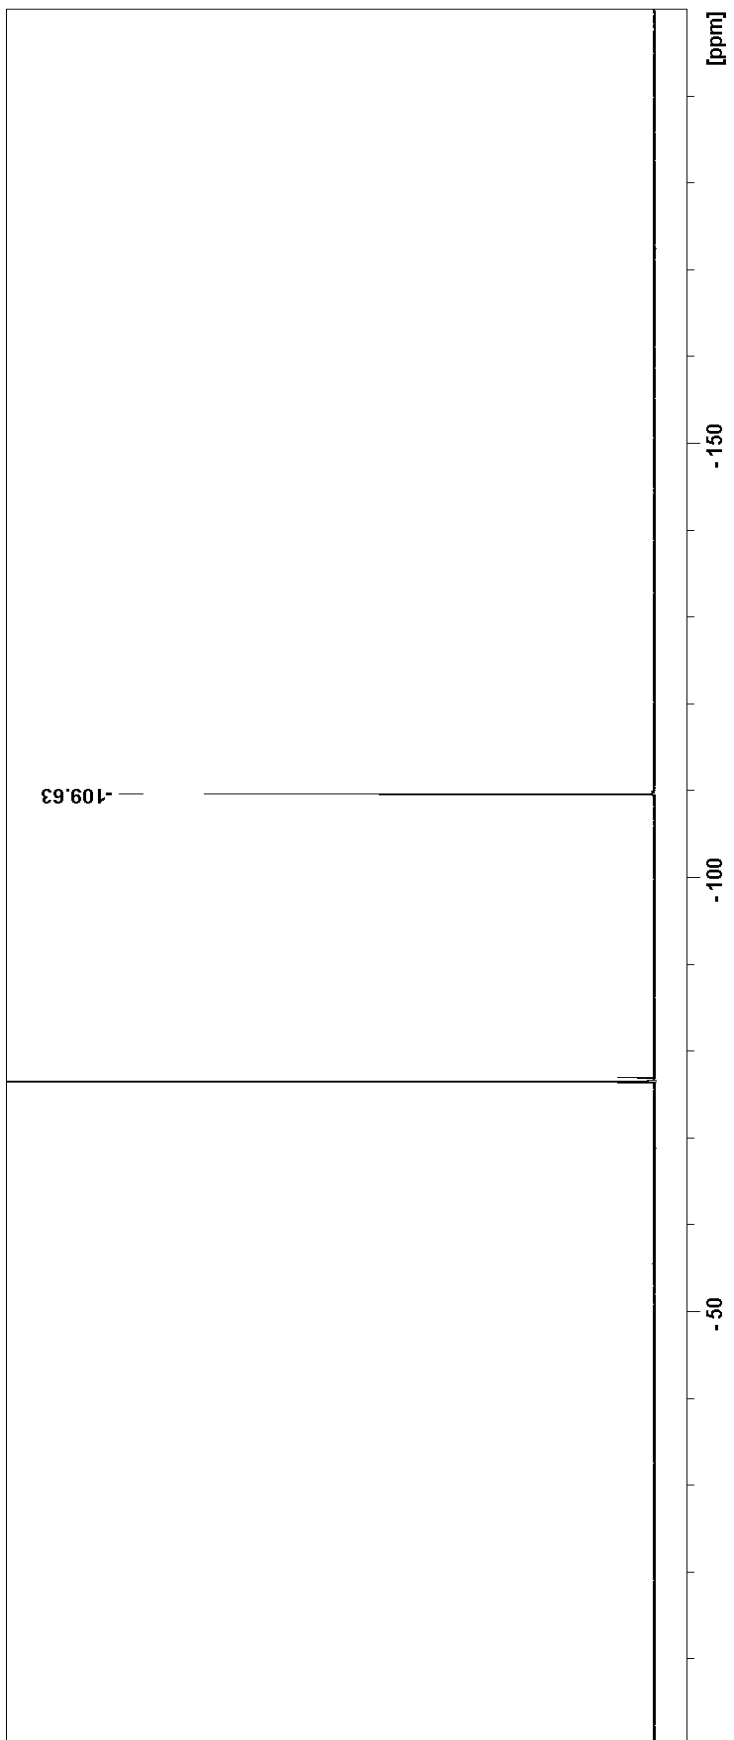

Figure S20.  $^{19}\text{F}\{^1\text{H}\}$  NMR (470 MHz,  $\text{CD}_2\text{Cl}_2/\text{TFA-d}_1$ , rt) of 7.

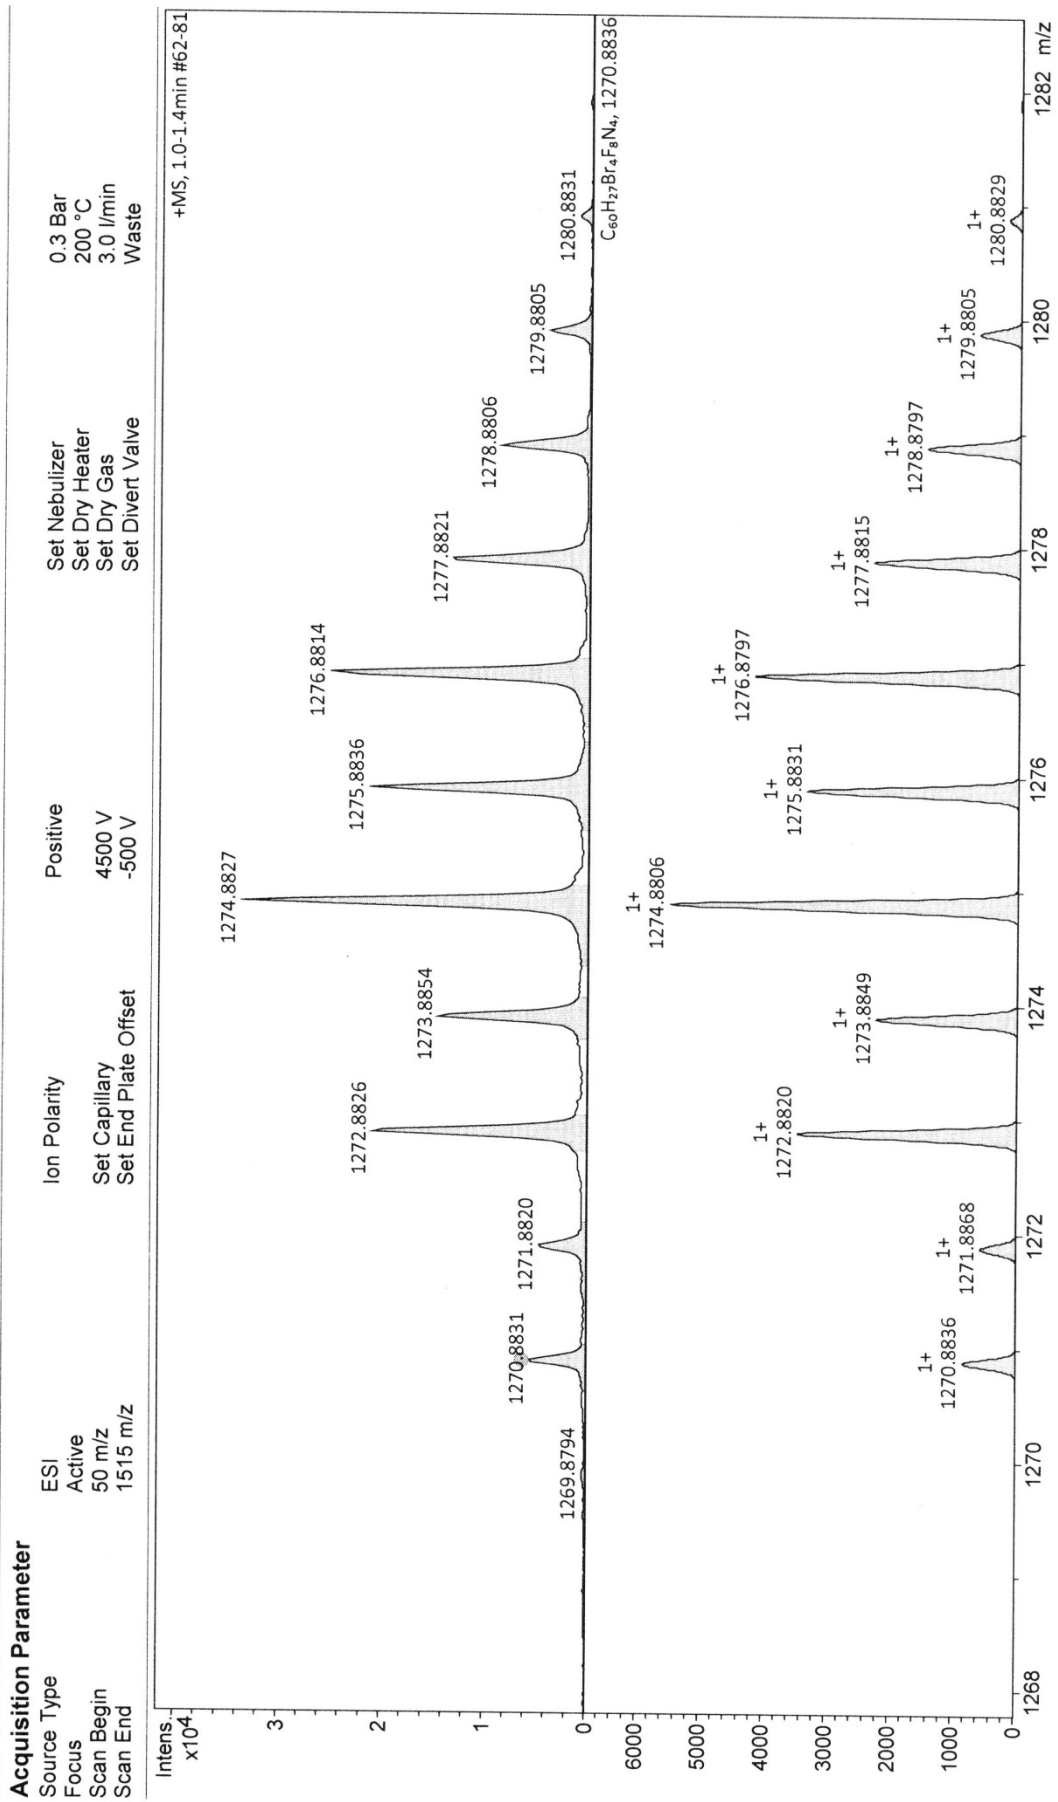

Figure S21. HRMS (ESI,  $CH_2Cl_2/MeCN$ ) of 7.

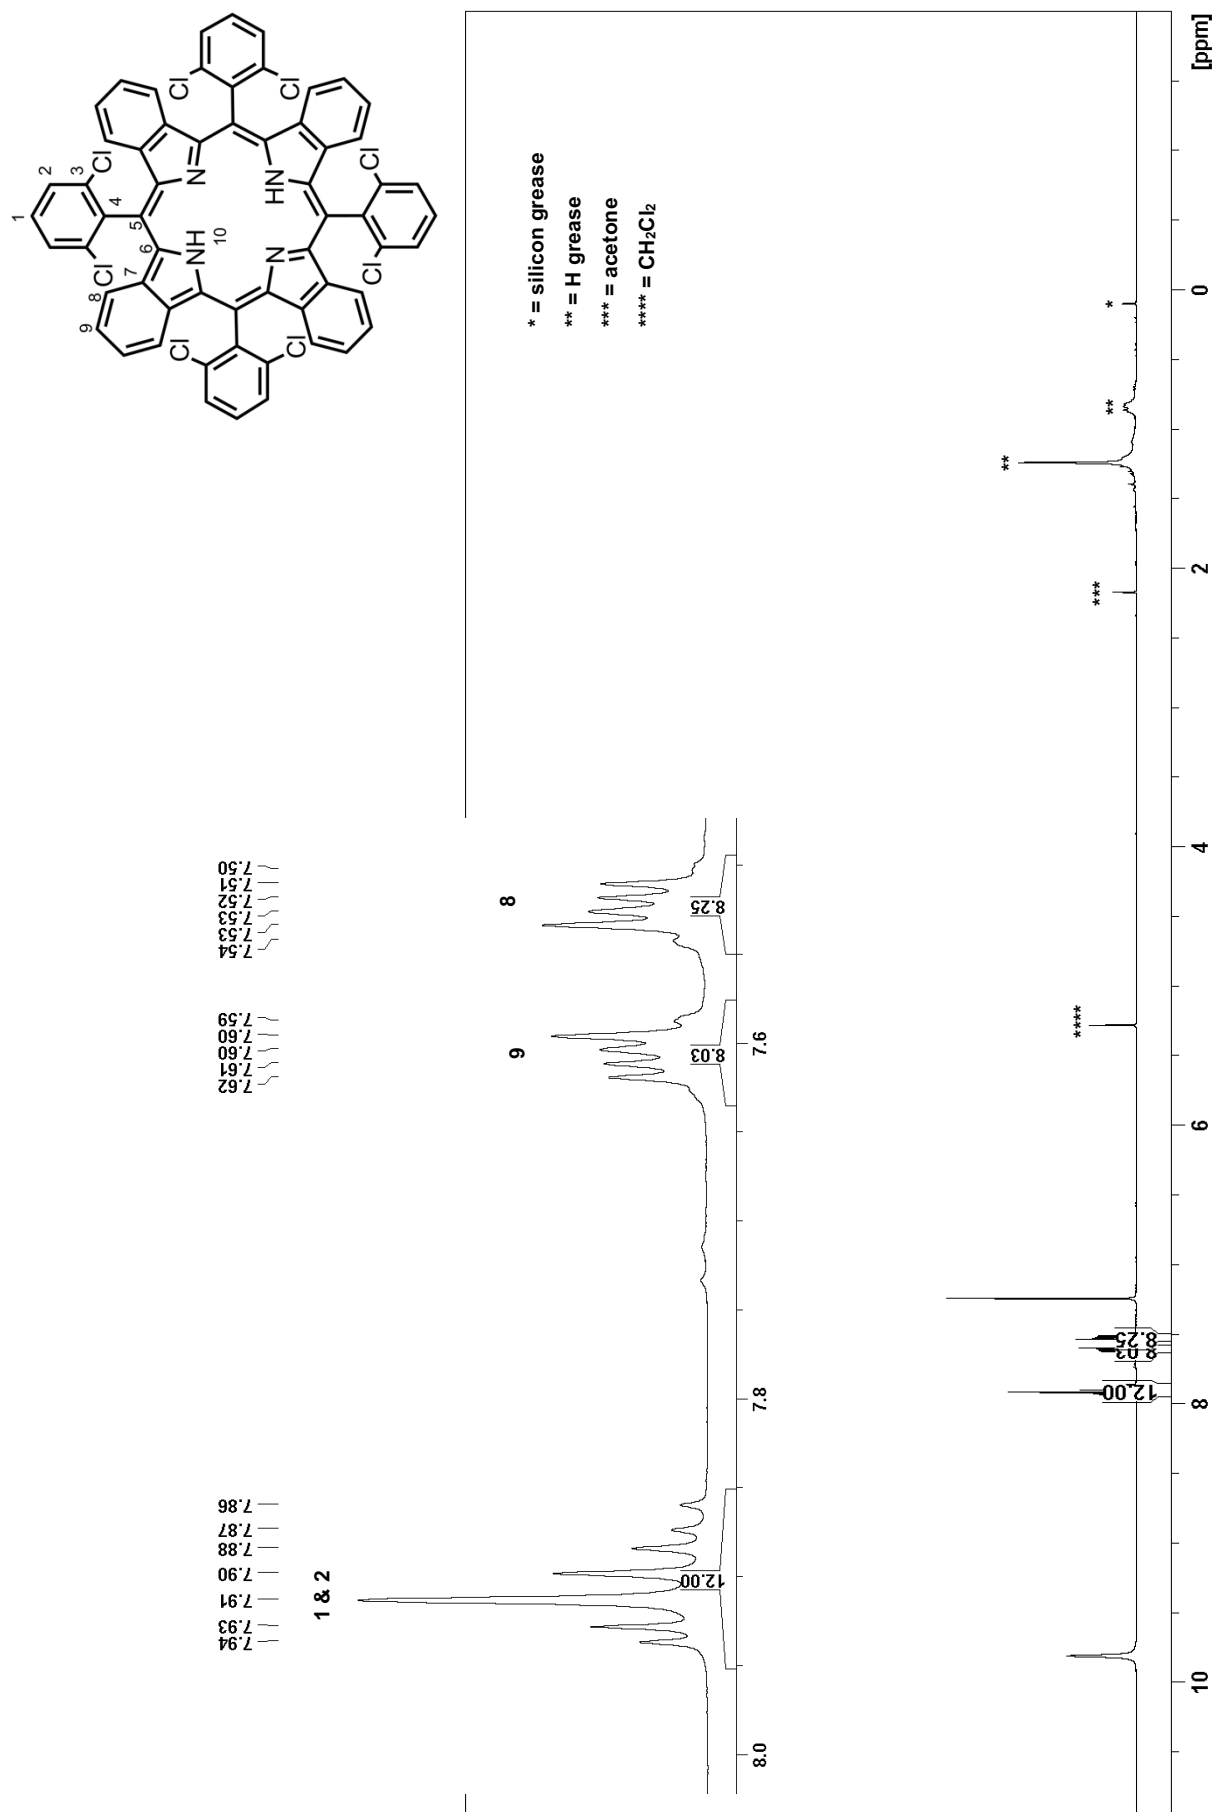

Figure S22. <sup>1</sup>H NMR (400 MHz, CDCl<sub>3</sub>/TFA-d<sub>1</sub>) of 8.

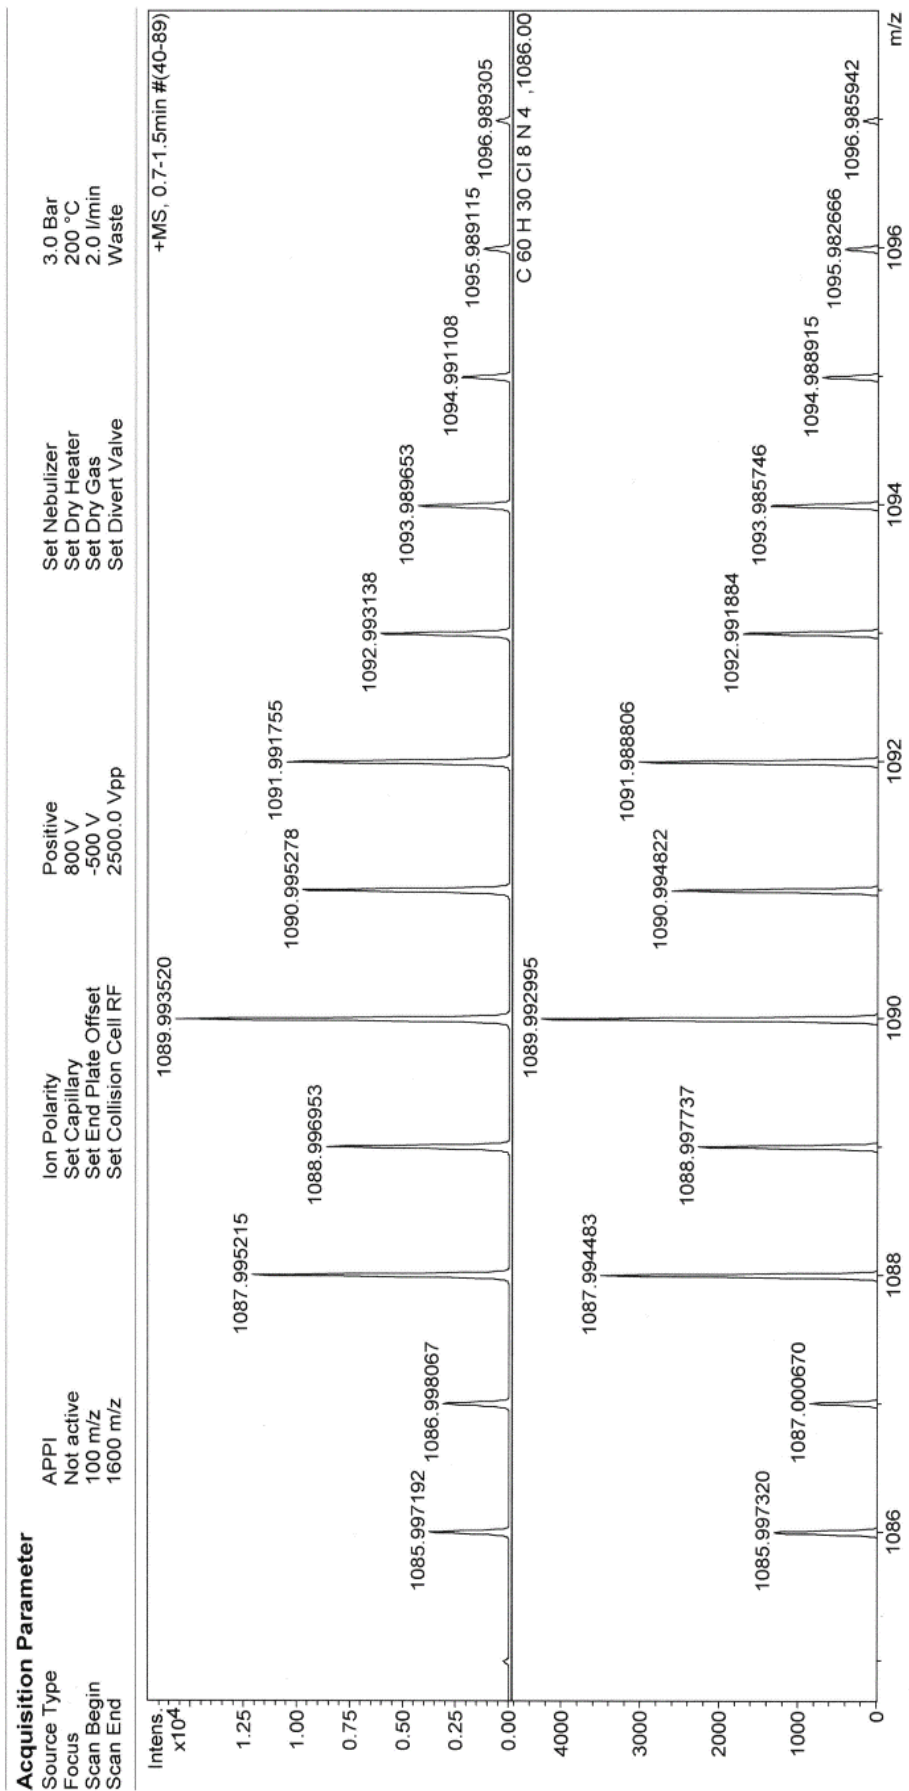

Figure S23. HRMS (APPI, toluene) of **8**.



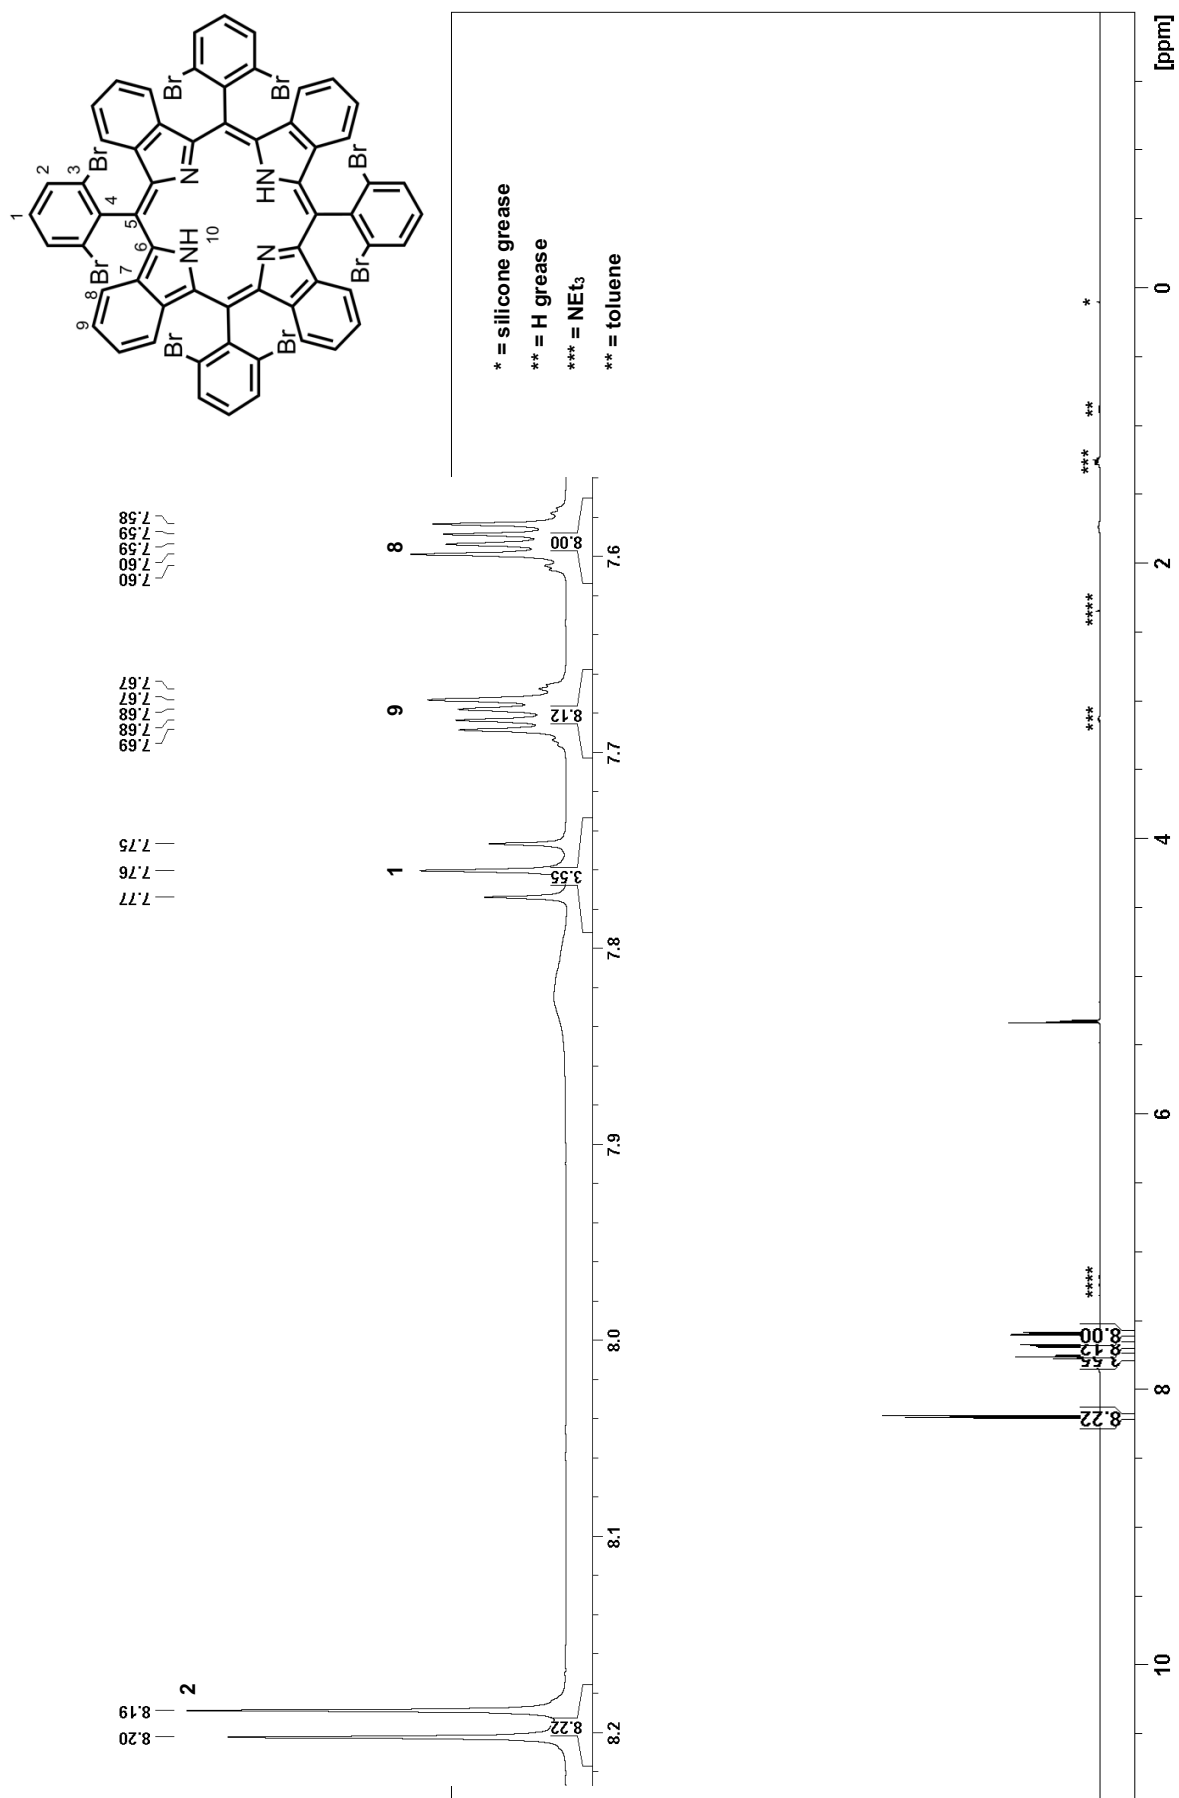

Figure S24. <sup>1</sup>H NMR (600 MHz, CD<sub>2</sub>Cl<sub>2</sub>/TFA-d<sub>1</sub>, rt) of S1.

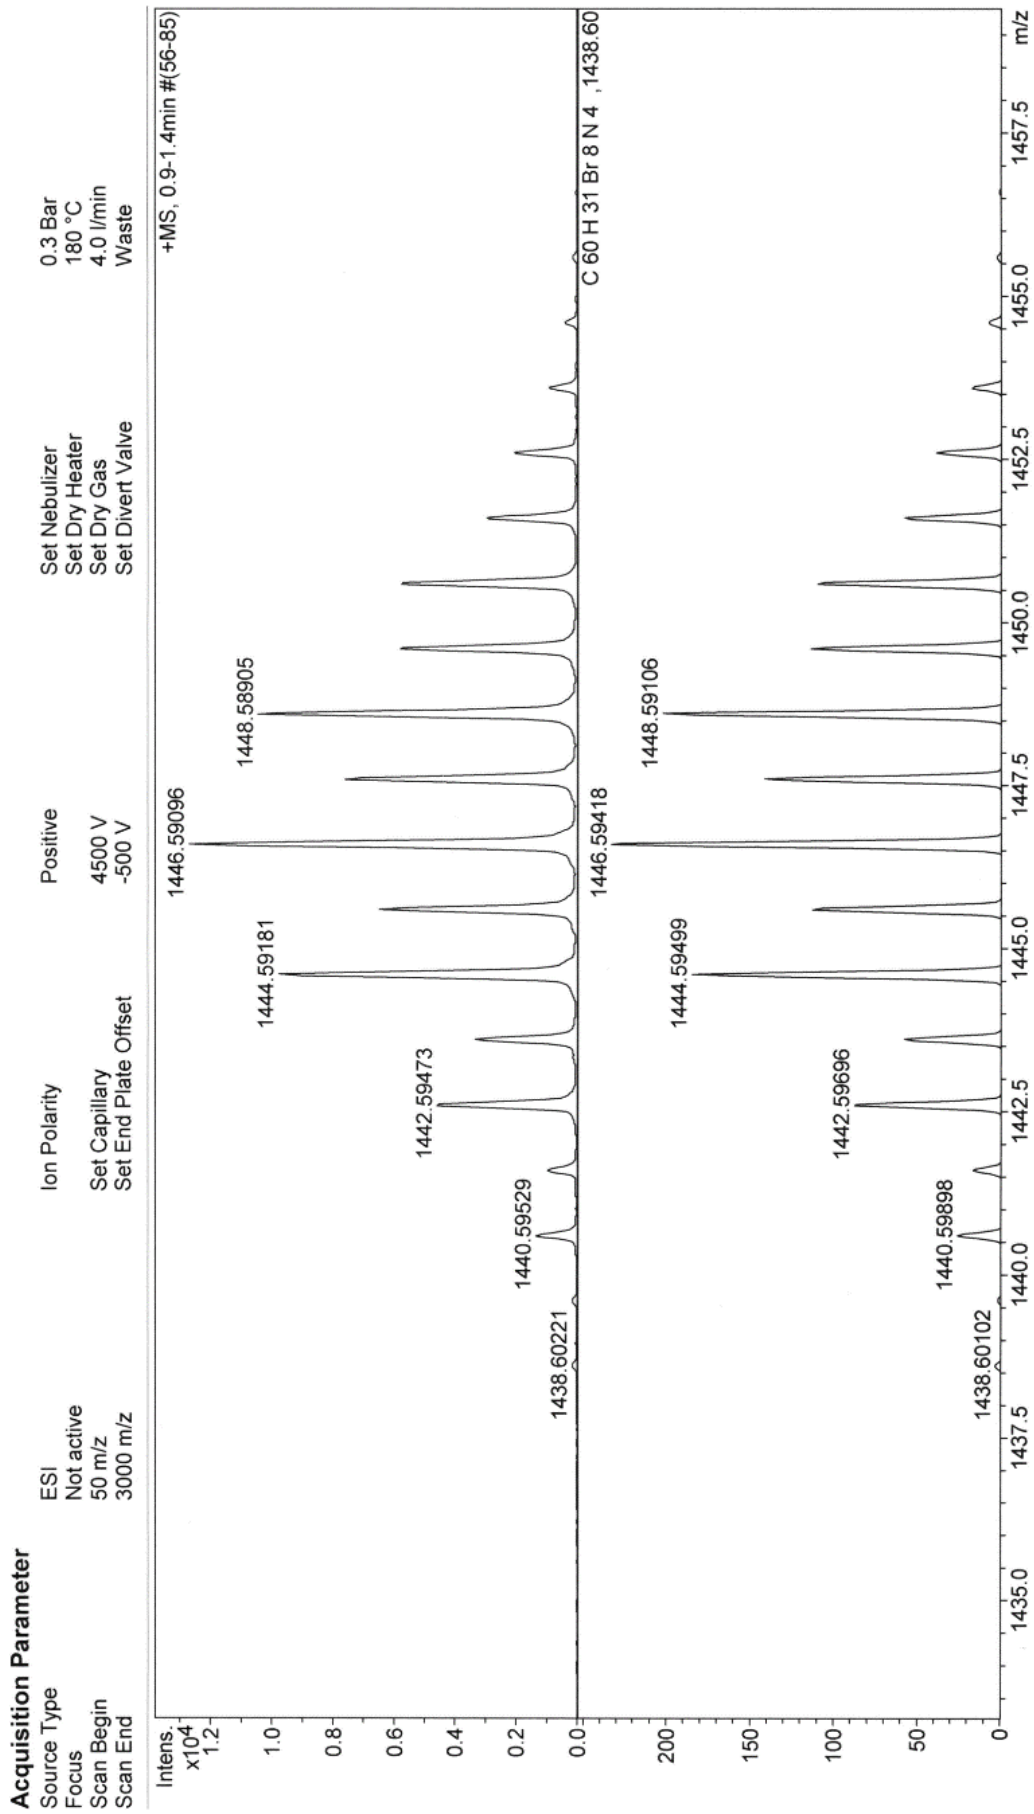

Figure S25. HRMS (ESI) of S1.

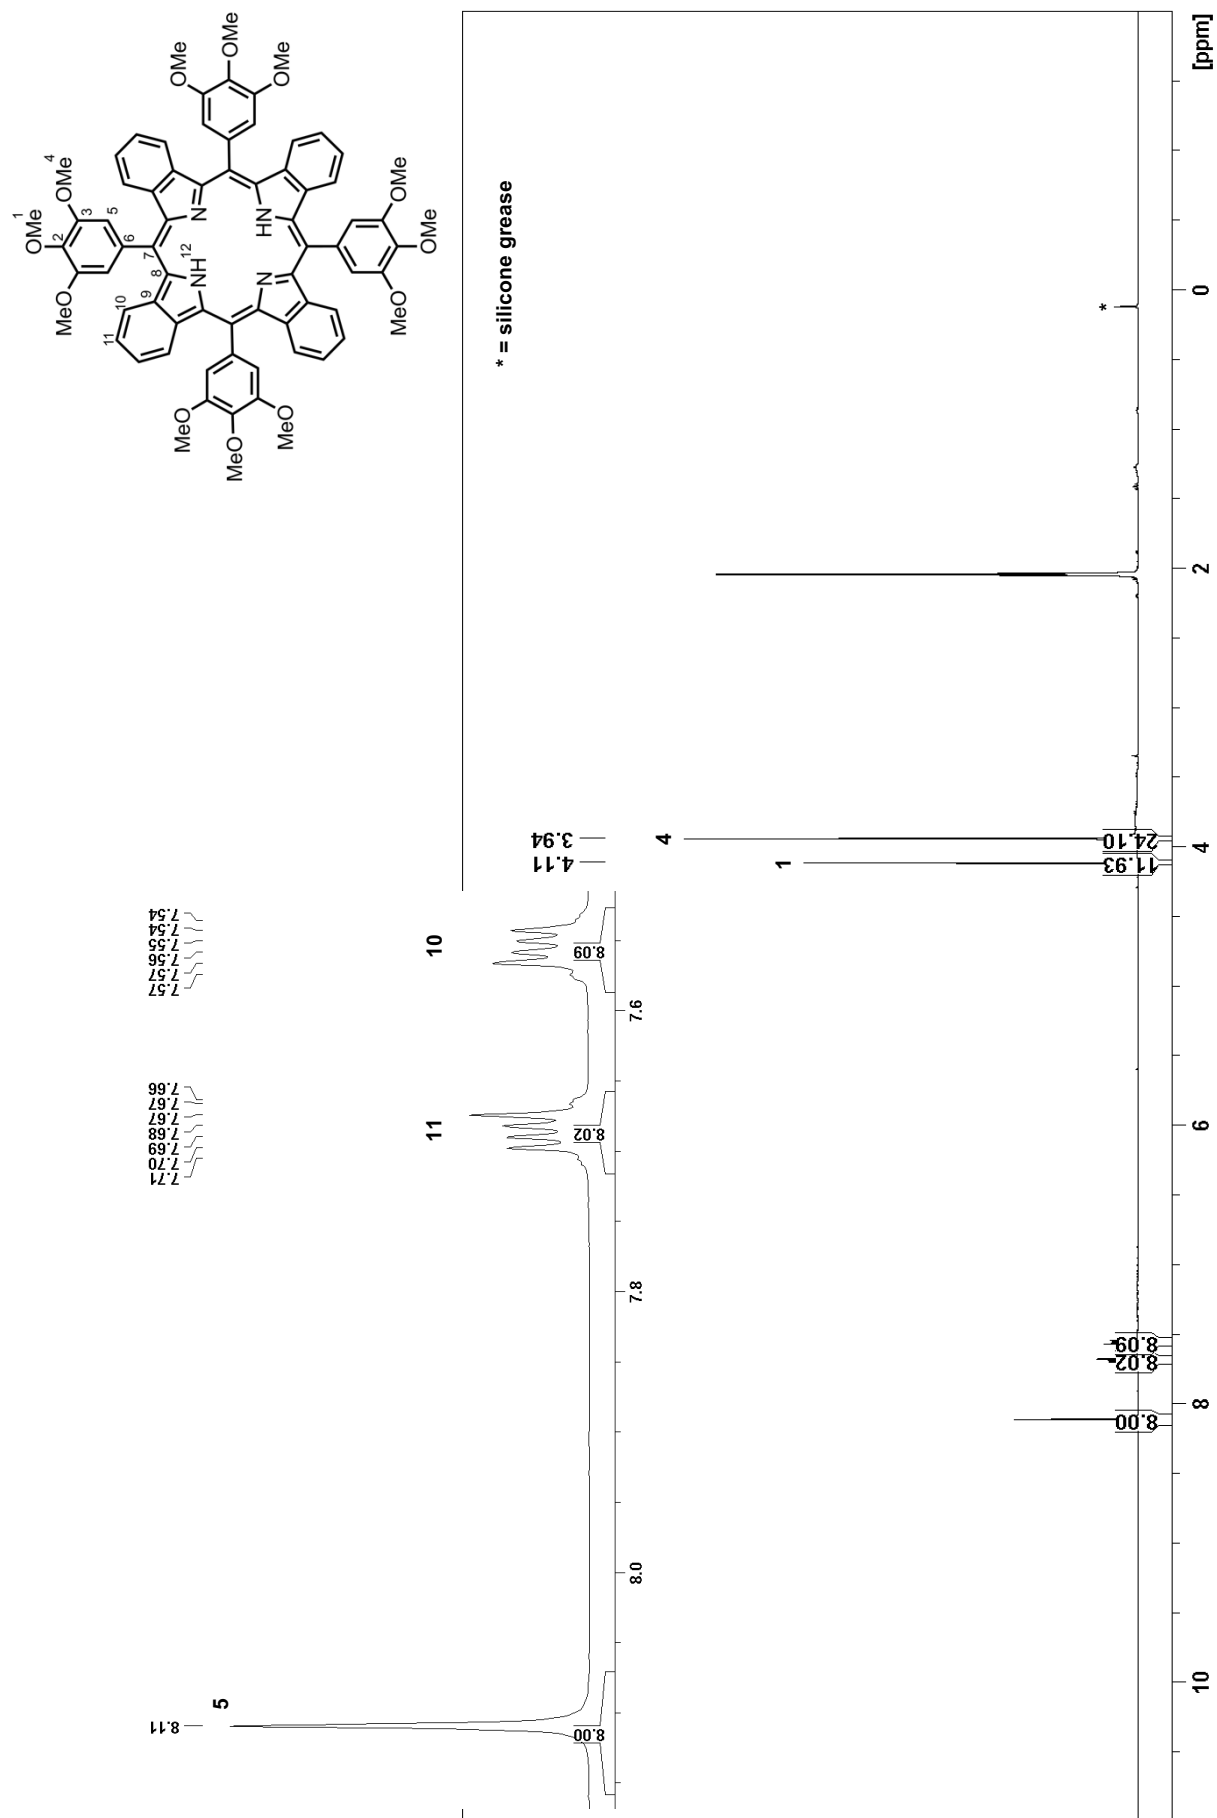

Figure S26. <sup>1</sup>H NMR (400 MHz, acetone-d<sub>6</sub>/TFA-d<sub>1</sub>) of S2.

**Acquisition Parameter**

|             |            |                      |          |                  |           |
|-------------|------------|----------------------|----------|------------------|-----------|
| Source Type | APPI       | Ion Polarity         | Positive | Set Nebulizer    | 2.5 Bar   |
| Focus       | Not active | Set Capillary        | 700 V    | Set Dry Heater   | 220 °C    |
| Scan Begin  | 50 m/z     | Set End Plate Offset | -500 V   | Set Dry Gas      | 1.5 l/min |
| Scan End    | 1550 m/z   | Set Charging Voltage | 0 V      | Set Divert Valve | Waste     |
|             |            | Set Corona           | 0 nA     | Set APCI Heater  | 400 °C    |

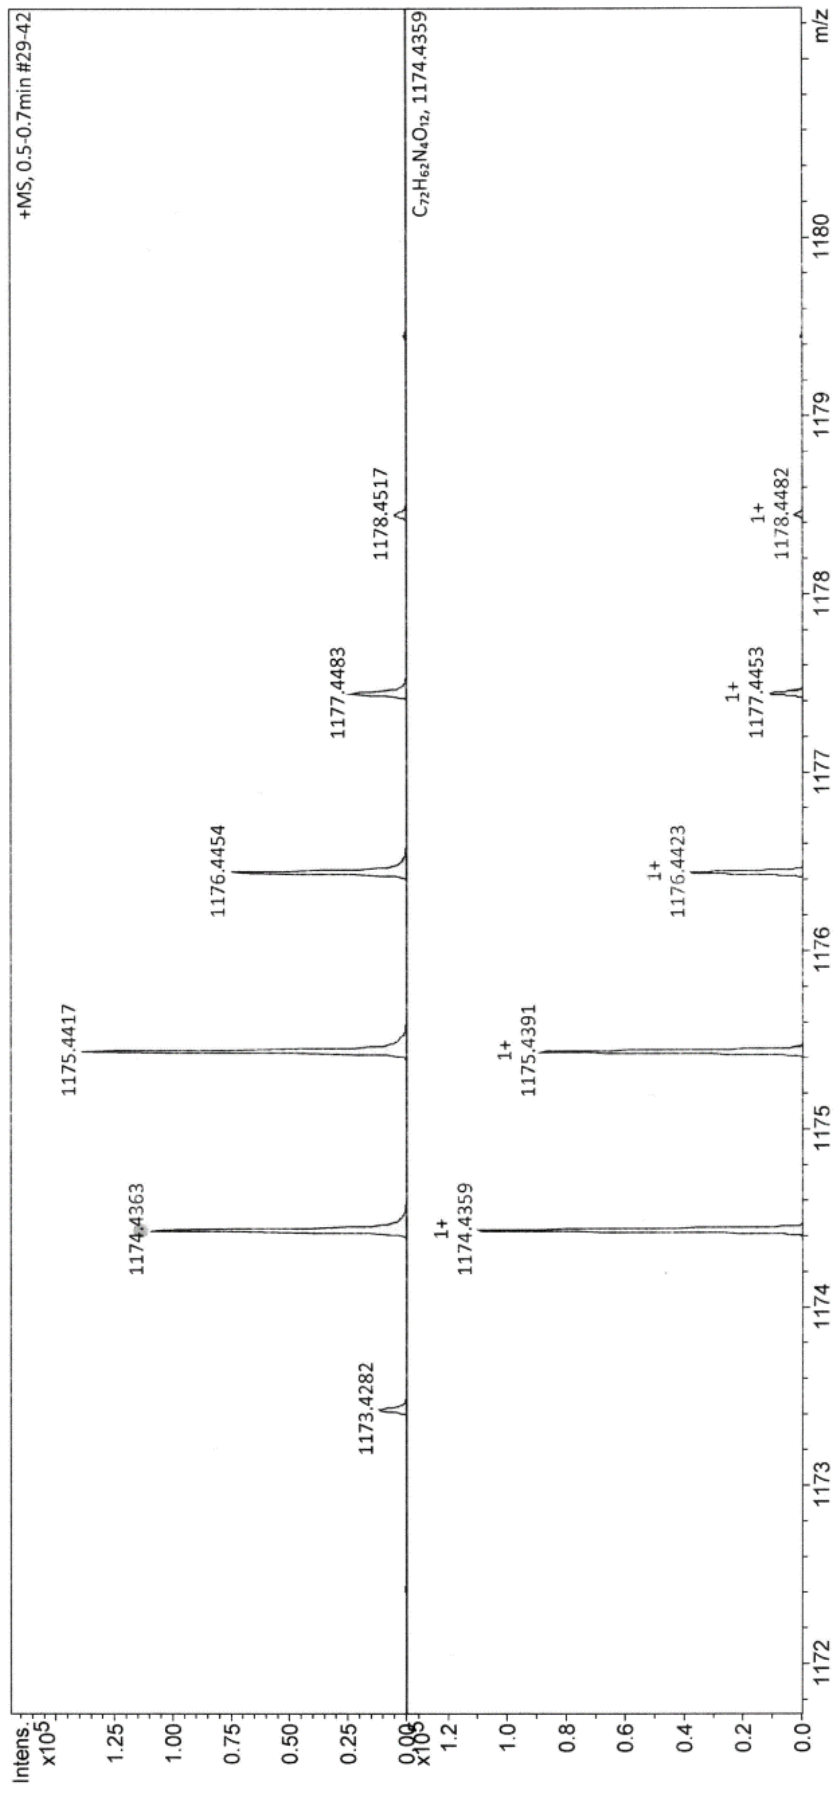

Figure S27. HRMS (APPI, toluene/CH<sub>2</sub>Cl<sub>2</sub>) of S2.

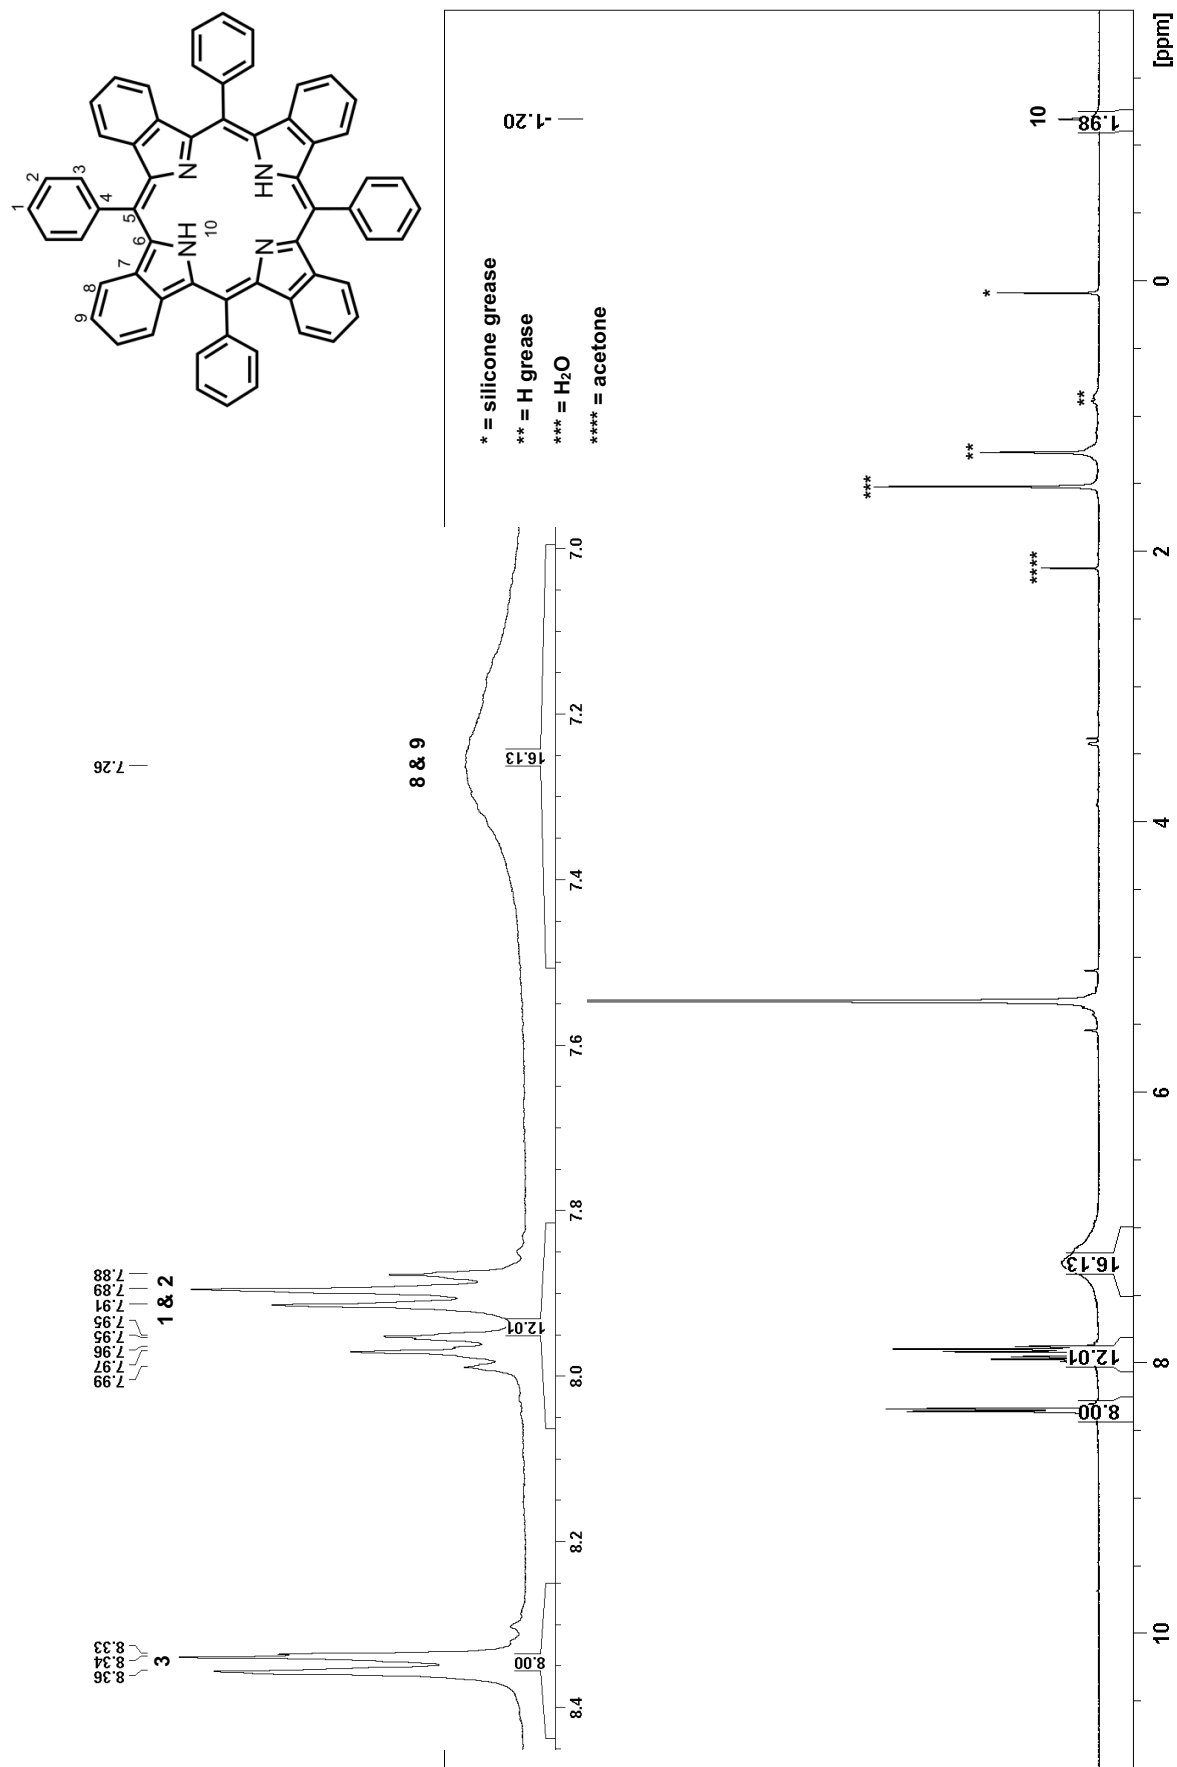

Figure S28. <sup>1</sup>H NMR (400 MHz, CD<sub>2</sub>Cl<sub>2</sub>, rt) of S3.

**Acquisition Parameter**

|             |            |                      |          |                  |           |
|-------------|------------|----------------------|----------|------------------|-----------|
| Source Type | APPI       | Ion Polarity         | Positive | Set Nebulizer    | 2.5 Bar   |
| Focus       | Not active | Set Capillary        | 800 V    | Set Dry Heater   | 200 °C    |
| Scan Begin  | 300 m/z    | Set End Plate Offset | -500 V   | Set Dry Gas      | 1.5 l/min |
| Scan End    | 2900 m/z   | Set Charging Voltage | 0 V      | Set Divert Valve | Waste     |
|             |            | Set Corona           | 0 nA     | Set APCI Heater  | 400 °C    |

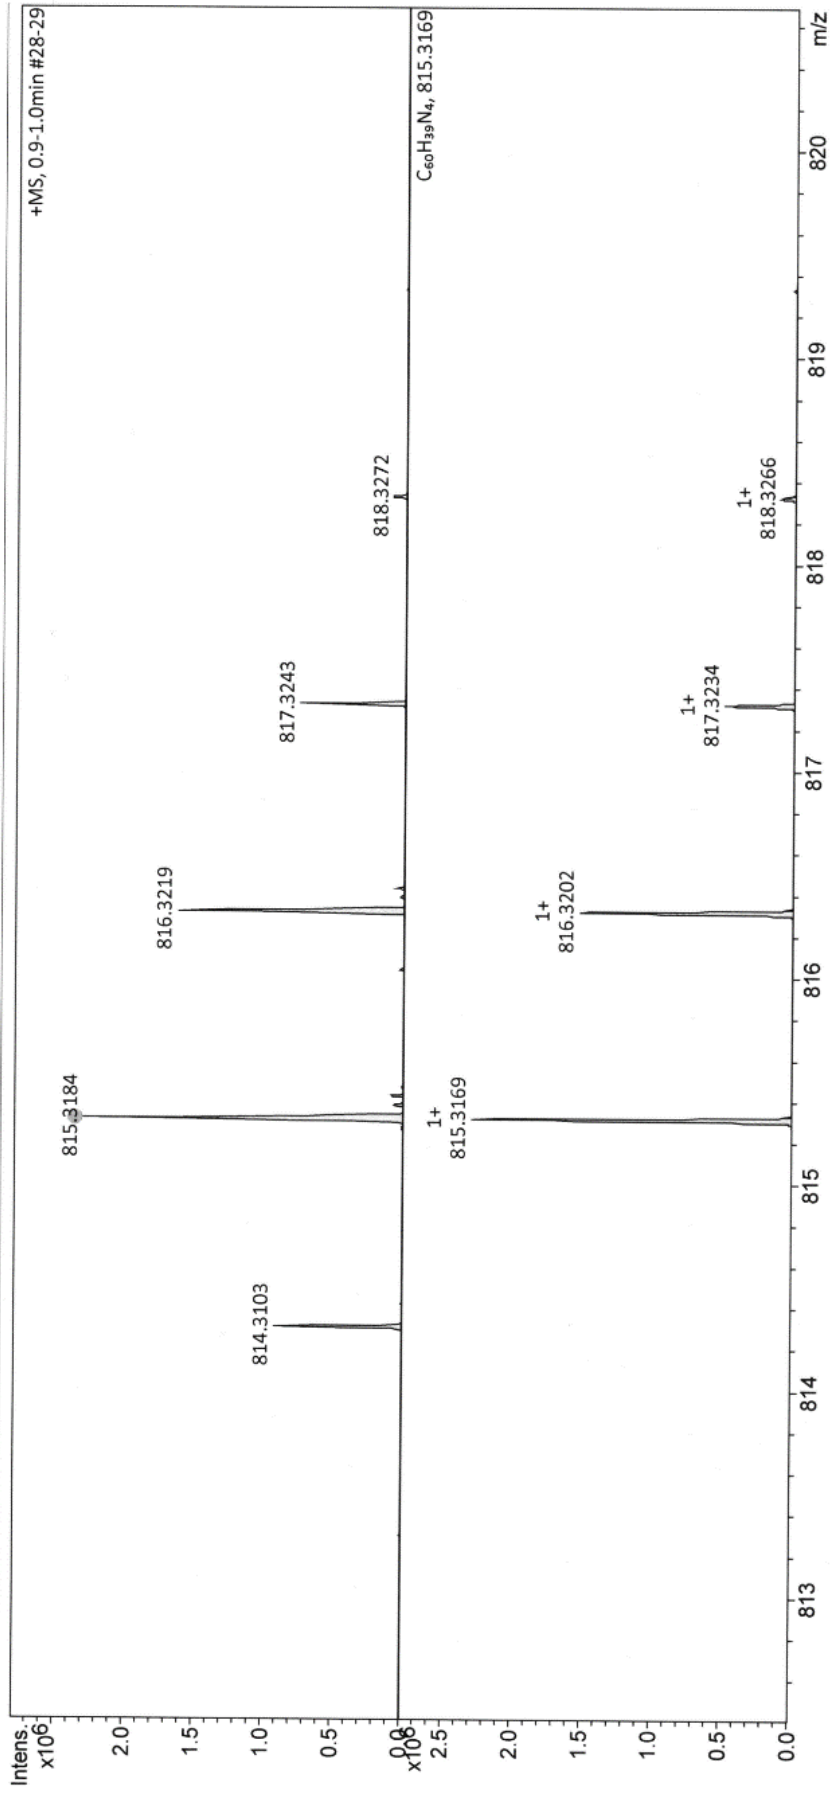

Figure S29. HRMS (APPI, toluene) of S3.

## 1.3 Chapter S1 – wet-chemical approaches to graphyrin

### Wet-chemical palladium-catalyzed C–H activation

As a starting point for the conditions of the Pd-catalyzed CH-activation we were inspired by the work of L. T. Scott on indeno-fused corannulenes, who utilized Pd(PCy<sub>3</sub>)<sub>2</sub>Cl<sub>2</sub> as catalyst, DBU as base and DMAc as solvent.<sup>[2]</sup> We applied this conditions to **8** and analyzed the reaction outcome by mass spectrometry as well as absorption spectroscopy. It is important to mention, that much higher concentration of the catalyst as well as longer reaction times were necessary to initiate the cyclization (see Table S1).

A significant broadening of all absorption features is observed for the reaction outcome in comparison with the reactant as depicted in Figure S30a. Furthermore, a red-shift of the Soret band and the Q-bands is found, which can be interpreted as an indicator for the  $\pi$ -extension of the TATBP macrocycle. According to mass spectrometry, three reaction events could be recognized: 1. C-C bond formation via HCl elimination, 2. Pd-insertion and 3. exchange of residual Cl substituents by hydrogens (hydrodehalogenation). Based on the isotopic pattern, it is assumed that the observed ion peak consists of several species, which differ in the number of formed C-C bonds. If the different constitutional isomers are also considered, it is not surprising that all attempts to separate the mixture by means of column chromatography or HPLC were unsuccessful. Even if the exact product distribution cannot be determined, since all derived ions might differ in their ionization ability, a rough estimation is achieved by simulation of the ion peak. As shown in Figure S30b, the measured spectrum is well represented by the simulated mixture of **8Pd-5HCl**, **8Pd-4HCl**, **8Pd-3HCl**, **8Pd-2HCl** and **8Pd-1HCl** with a distribution of 1 : 7 : 5 : 4 : 4. Furthermore, the same product distribution was found when **8Pd** instead of **8** was used as starting material, which led to the conclusion that palladium insertion occurs early during the reaction.

Moreover, we found an interesting trend of the reaction outcome screening the reaction of **8** in a temperature range from 150 to 300 °C. For temperatures below 180 °C, neither HCl elimination, Pd-insertion nor hydrodehalogenation took place, while a shift of signals to higher *m/z* values is found with increasing temperature. This observation suggests that higher temperatures favor the undesired hydrodehalogenation reaction, which is demonstrated in Figure S31 by simulating the mass spectra of the reaction outcome at 180, 240 and 300 °C, respectively.

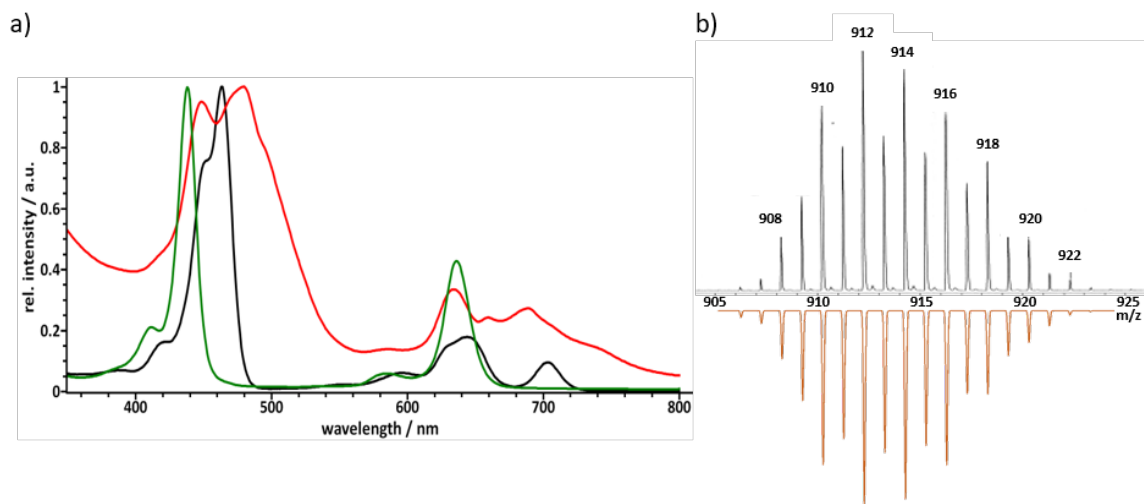

**Figure S30.** Exemplified UV/Vis and MS analysis of a reaction outcome: a) normalized absorption spectrum of **8** (black line), **8Pd** (green line) and the **reaction outcome** (red line); b) measured (top) and simulated (bottom) mass spectrum of the **reaction outcome**.

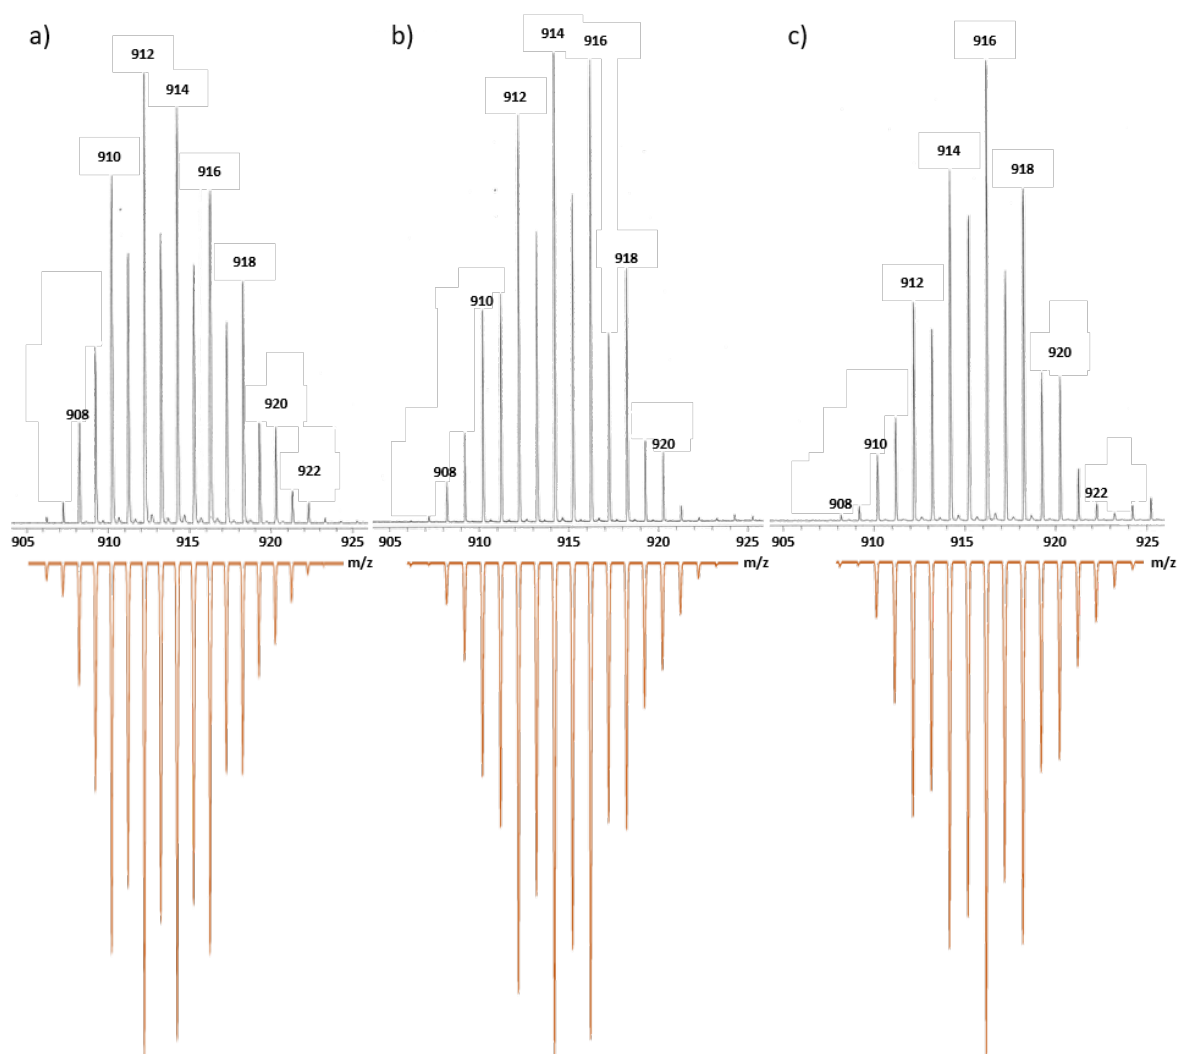

**Figure S31.** Measured (top) and simulated (bottom) mass spectra after Pd-catalyzed CH-activation of **8** at different reaction temperatures: a) 180 °C; b) 240 °C; c) 300 °C.



**Table S1.** Experimental conditions for Pd-catalyzed C–H activation: A 5 mL MW vial equipped with a magnetic stir bar was charged with **8** (10 mg), Pd(PCy<sub>3</sub>)<sub>2</sub>Cl<sub>2</sub> (8 eq), and dissolved in DMAc/DBU (2.5 mL, 4:1, v:v). The mixture was deoxygenated and reacted in the microwave reactor: elevated temperatures, 4 h, high absorption level). CH<sub>2</sub>Cl<sub>2</sub> (50 mL) was added and the organic layer was washed with 10% aqueous HCl (2x 20 mL), 10% aqueous Na<sub>2</sub>CO<sub>3</sub> (2x 20 mL) and brine (20 mL). After drying over MgSO<sub>4</sub>, the solvent was removed, and the residue was filtered over silica gel (THF). After evaporation of the solvent a dark green solid was obtained.

| <b>N</b> | <b>Temperature</b> | <b>Observations</b>                                                                                                    |
|----------|--------------------|------------------------------------------------------------------------------------------------------------------------|
| 1        | 150 °C             | No reaction                                                                                                            |
| 2        | 160 °C             | No reaction                                                                                                            |
| 3        | 170 °C             | No reaction                                                                                                            |
| 4        | 180 °C             | Color change to olive, Pd-insertion (metalation), mixture of different cyclization, hydrodehalogenation side reaction. |
| 5        | 200 °C             | Color change to olive, Pd-insertion (metalation), mixture of different cyclization, hydrodehalogenation side reaction. |
| 6        | 220 °C             | Color change to olive, Pd-insertion (metalation), mixture of different cyclization, hydrodehalogenation side reaction. |
| 7        | 240 °C             | Color change to olive, Pd-insertion (metalation), mixture of different cyclization, hydrodehalogenation side reaction. |
| 8        | 260 °C             | Color change to olive, Pd-insertion (metalation), mixture of different cyclization, hydrodehalogenation side reaction. |
| 9        | 280 °C             | Color change to olive, Pd-insertion (metalation), mixture of different cyclization, hydrodehalogenation side reaction. |
| 10       | 300 °C             | Color change to olive, Pd-insertion (metalation), mixture of different cyclization, hydrodehalogenation side reaction. |

Since aryl bromides usually show a better reactivity in Pd-catalyzed reactions, we exchanged **8** for its brominated derivate **S1**, but no significant difference was observed as summarized in Table S2.

**Table S2.** Experimental conditions for Pd-catalyzed C–H activation: A 5 mL MW vial equipped with a magnetic stir bar was charged with **S1** (10 mg), Pd(PCy<sub>3</sub>)<sub>2</sub>Cl<sub>2</sub>, and dissolved in DMAc/DBU (2.5 mL, 4:1, v:v). The mixture was deoxygenated and reacted in the microwave reactor: elevated temperatures, 4 h, high absorption level). CH<sub>2</sub>Cl<sub>2</sub> (50 mL) was added and the organic layer was washed with 10% aqueous HCl (2x 20 mL), 10% aqueous Na<sub>2</sub>CO<sub>3</sub> (2x 20 mL) and brine (20 mL). After drying over MgSO<sub>4</sub>, the solvent was removed, and the residue was filtered over silica gel (THF). After evaporation of the solvent a dark green solid was obtained.

| <b>N</b> | <b>conditions</b>                                                     | <b>observations</b>                                                                                                   |
|----------|-----------------------------------------------------------------------|-----------------------------------------------------------------------------------------------------------------------|
| 11       | [Pd] (8 eq), 180 °C                                                   | Color change to olive, Pd-insertion (metalation), mixture of different cyclization, hydrodehalogenation side reaction |
| 12       | [Pd] (8 eq), 130 °C                                                   | No reaction                                                                                                           |
| 13       | [Pd] (8 eq), 140 °C                                                   | No reaction                                                                                                           |
| 14       | [Pd] (8 eq), 150 °C                                                   | No reaction                                                                                                           |
| 13       | [Pd] (8 eq), 160 °C                                                   | Color change to olive, Pd-insertion (metalation), mixture of different cyclization, hydrodehalogenation side reaction |
| 15       | [Pd] (8 eq), 170 °C                                                   | Color change to olive, Pd-insertion (metalation), mixture of different cyclization, hydrodehalogenation side reaction |
| 17       | [Pd] (8 eq), 200 °C                                                   | Color change to olive, Pd-insertion (metalation), mixture of different cyclization, hydrodehalogenation side reaction |
| 18       | [Pd] (10 eq), 120 °C, 14 d                                            | Color change to olive, Pd-insertion (metalation), mixture of different cyclization, hydrodehalogenation side reaction |
| 19       | [Pd] (10 eq), DMAc (2.5 mL), Cs <sub>2</sub> CO <sub>3</sub> , 150 °C | No reaction                                                                                                           |
| 20       | [Pd] (10 eq), DMAc (2.5 mL), P <sub>1</sub> - <i>t</i> Bu, 150 °C     | No reaction                                                                                                           |
| 21       | [Pd] (9 eq), DMF/DBU (2.5 mL, 4:1, v:v), 160 °C, 4 d                  | Color change to olive, Pd-insertion (metalation), mixture of different cyclization, hydrodehalogenation side reaction |
| 22       | [Pd] (9 eq), Dioxane/DBU (2.5 mL, 4:1, v:v), 160 °C, 4 d              | Color change to olive, Pd-insertion (metalation), mixture of different cyclization, hydrodehalogenation side reaction |
| 23       | [Pd] (9 eq), THF/DBU (2.5 mL, 4:1, v:v), 160 °C, 4 d                  | Color change to olive, Pd-insertion (metalation), mixture of different cyclization, hydrodehalogenation side reaction |
| 24       | [Pd] (9 eq), MeCN/DBU (2.5 mL, 4:1, v:v), 160 °C, 4 d                 | No reaction                                                                                                           |

## Wet-chemical intramolecular oxidative cyclodehydrogenation

In addition to the Pd-catalyzed cyclization attempts, the intramolecular oxidative cyclodehydrogenation pathway was tested (see examples in Table S3). It has been demonstrated that this approach is a powerful tool for fusing aromatic units at the *meso*- $\beta$ -position of the porphyrin macrocycle via 5- or 6-membered ring formation.<sup>[3,4]</sup> Therefore, **S2** as well as **S2Ni** or **S3** were tested under standard conditions using FeCl<sub>3</sub> in MeNO<sub>2</sub>, but no reaction was observed and only starting material was recovered. Even harsher reaction conditions, like e.g. DDQ and Trifluoromethanesulfonic acid did not lead to any C-C bond formation, however partial hydrolysis of the methyl ether was detected by mass spectrometry.

### Experimental procedures for oxidative cyclodehydrogenation attempts

**FeCl<sub>3</sub> route:** A 250 mL Schlenk-RBF equipped with a magnetic stir bar, a rubber septum and a glass tube was charged with **S2** (50 mg, 42.5  $\mu$ mol) [or **S2Ni** (52 mg, 42.2  $\mu$ mol) or **S3** (35 mg, 42.9  $\mu$ mol)] and dissolved in CH<sub>2</sub>Cl<sub>2</sub> (150 mL). The mixture was cooled to -20 °C and deoxygenated by bubbling N<sub>2</sub> through the solution for 20 min. A solution of FeCl<sub>3</sub> (148 mg, 910  $\mu$ mol) in MeNO<sub>2</sub> (0.5 mL) was added slowly while bubbling vigorously N<sub>2</sub> into the reaction mixture at -20 °C. After 60 minutes, the N<sub>2</sub> bubbling was stopped and the mixture was stirred under N<sub>2</sub> atmosphere for 16 h, while the temperature slowly raised to rt. The reaction was quenched by addition of MeOH (5 mL). The organic layer was washed with saturated aqueous NaHCO<sub>3</sub> (2x 100 mL) and brine (100 mL). After drying over MgSO<sub>4</sub>, the solvent was removed and the residue was filtered over silica gel (THF/CH<sub>2</sub>Cl<sub>2</sub>, 2:1, v:v). After evaporation of the solvent a green solid was obtained.

**DDQ/TfOH route:** A 250 mL Schlenk-RBF equipped with a magnetic stir bar, a rubber septum and a glass tube was charged with **S2** (50 mg, 42.5  $\mu$ mol [or **S3** (40 mg, 49.1  $\mu$ mol)], DDQ (106 mg, 468  $\mu$ mol) and dissolved in CH<sub>2</sub>Cl<sub>2</sub> (150 mL). The mixture was cooled to -20 °C and deoxygenated by bubbling N<sub>2</sub> through the solution for 20 min. Trifluoromethanesulfonic acid (83  $\mu$ L, 141 mg, 936  $\mu$ mol) was added and the mixture was stirred under N<sub>2</sub> atmosphere for 16 h, while the temperature slowly raised to rt. The reaction was quenched by addition of MeOH (5 mL). The organic layer was washed with 10% aqueous Na<sub>2</sub>SO<sub>3</sub> (150 mL), 10% aqueous Na<sub>2</sub>CO<sub>3</sub> (150 mL) and brine (100 mL). After drying over MgSO<sub>4</sub>, the solvent was removed and the residue

was filtered over silica gel (THF/CH<sub>2</sub>Cl<sub>2</sub>, 2:1, v:v). After evaporation of the solvent a green solid was obtained.

**Table S3.** Summary of distinct examples of intramolecular cyclodehydrogenation attempts of different TATBPs.

| <b>N</b> | <b>Compound</b> | <b>Conditions</b>                                                       | <b>Observations</b>                      |
|----------|-----------------|-------------------------------------------------------------------------|------------------------------------------|
| 1        | <b>S2</b>       | FeCl <sub>3</sub> , MeNO <sub>2</sub> , CH <sub>2</sub> Cl <sub>2</sub> | No reaction, starting material recovered |
| 2        | <b>S2Ni</b>     | FeCl <sub>3</sub> , MeNO <sub>2</sub> , CH <sub>2</sub> Cl <sub>2</sub> | No reaction, starting material recovered |
| 3        | <b>S2</b>       | DDQ, TfOH                                                               | Ether hydrolysis                         |
| 4        | <b>S3</b>       | FeCl <sub>3</sub> , MeNO <sub>2</sub> , CH <sub>2</sub> Cl <sub>2</sub> | No reaction, starting material recovered |
| 5        | <b>S3</b>       | DDQ, TfOH                                                               | No reaction, starting material recovered |

## 2. MASS SPECTROMETRIC SECTION

### 2.1 General information

ESI experiments were conducted in positive ion-mode and with two different ESI mass spectrometers.

The first instrument was an ultra-high resolution Fourier transform ion cyclotron resonance (FT-ICR) mass spectrometer (solariX, Bruker, Bremen, Germany). The following settings were applied. Flow rate of the sample solution by syringe pump infusion  $5.0 \mu\text{Lmin}^{-1}$ , nebuliser nitrogen pressure 400 hPa, capillary entrance voltage -5.0 kV, spray shield voltage -4.5 kV, nitrogen dry gas temperature 453 K, dry gas flow rate 4.0 L/min. Energy-resolved collision-induced dissociations ( $\text{MS}^2$ , CID) were conducted in a collision cell following a mass selecting quadrupole and preceding the high-resolution daughter ion analysis in the Paracell<sup>TM</sup> analyser. Argon (Ar) served as the collision gas. For the measurements at the solariX mass spectrometer, the samples were dissolved separately in DCM and then diluted individually in acetonitrile (ACN) with 0.2% formic acid. The solution (0.005 mg/mL) was introduced to the ESI-MS ionization chamber by direct infusion.

The second instrument was an ESI-quadrupole time-of-flight (qToF) mass spectrometer (maXis, Bruker, Bremen, Germany). The following settings were applied. Flow rate of the sample solution by syringe pump infusion  $3.0 \mu\text{Lmin}^{-1}$ , nebuliser nitrogen pressure 400 hPa, capillary entrance voltage -4.3 kV, spray shield voltage -3.8 kV, nitrogen dry gas temperature 473 K, dry gas flow rate 4.0 L/min. Energy-resolved collision-induced dissociations ( $\text{MS}^2$ , CID) were conducted under multiple collision conditions in a collision quadrupole following a mass selecting quadrupole and preceding the high-resolution daughter ion analysis in the TOF analyser. Nitrogen ( $\text{N}_2$ ) served as the collision gas.

For the maXis qToF instrument, the porphyrins were dissolved separately in dichloromethane (DCM) and then diluted individually with a mixture of MeOH:DCM (Volume ratio 2:1). After thorough mixing, the  $10^{-5}$  M solution was introduced to the ESI-MS ionization chamber by direct infusion.

## 2.2 Chapter S2 – Dissociation Experiments of 8 and 8Pd

### QTOF experiments with 8

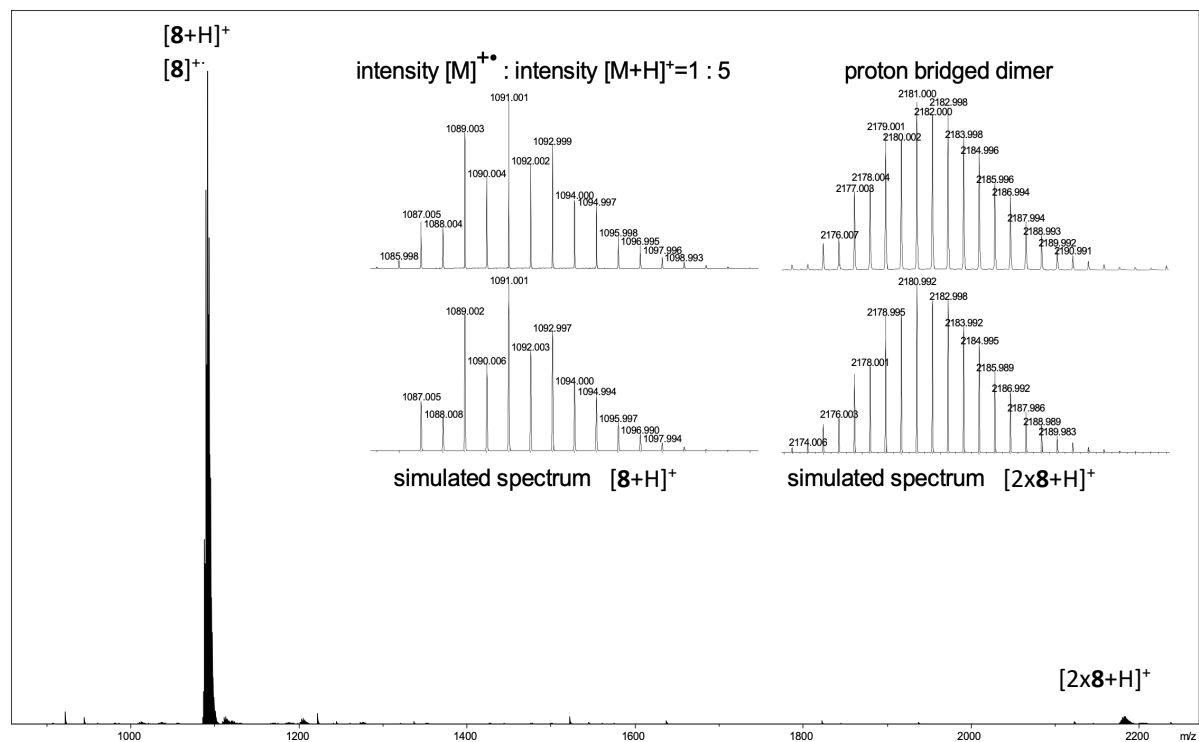

Figure S32. Analysis of precursor ion nature.

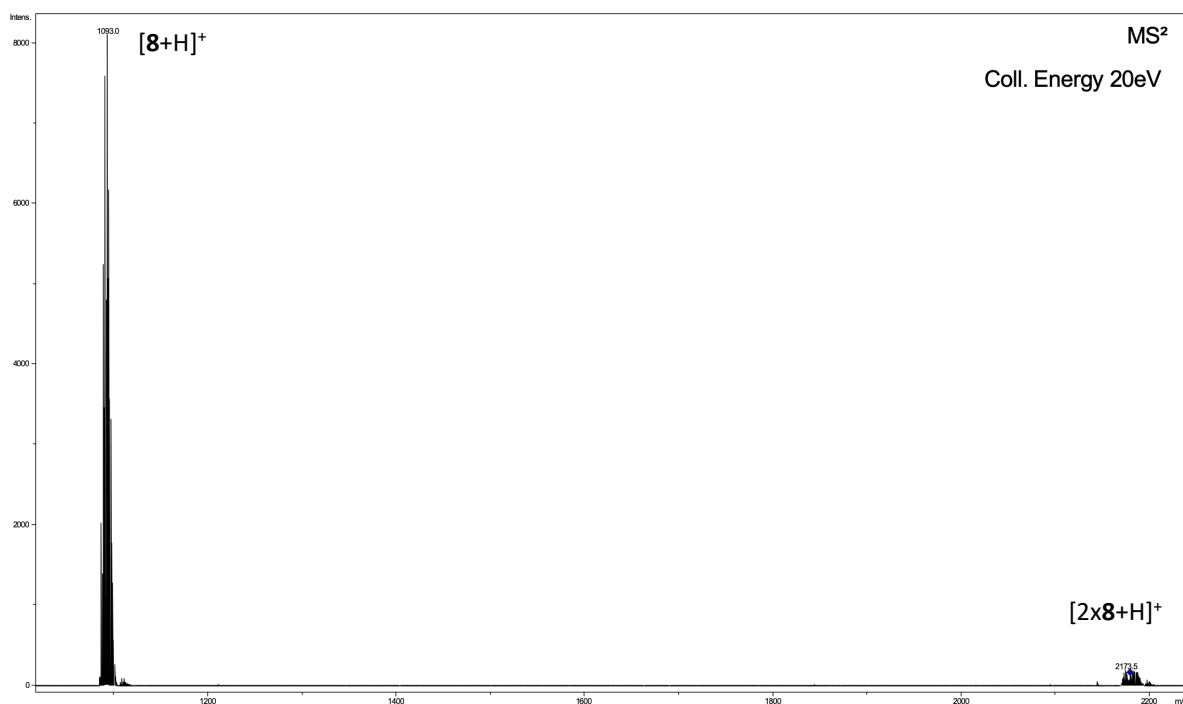

Figure S33. MS<sup>2</sup> of proton bridged dimer.

## FT-ICR experiments with **8**

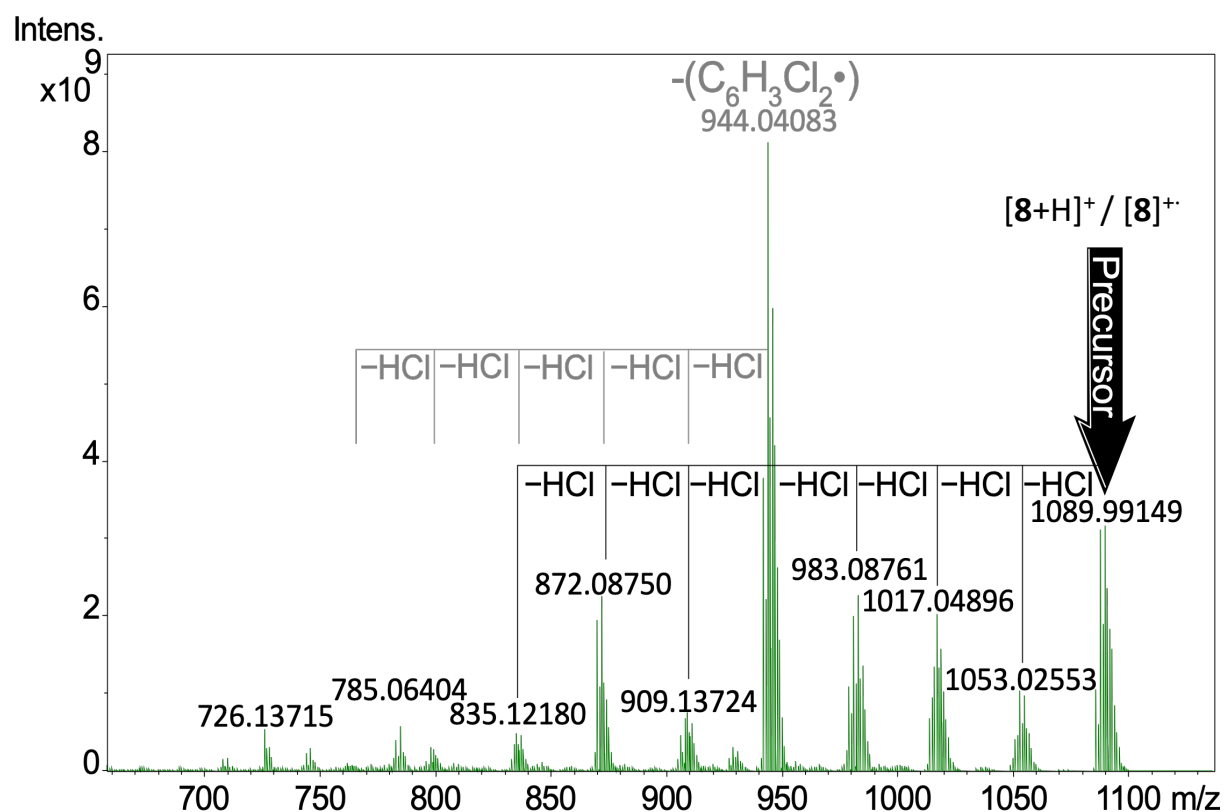

**Figure S34.** Overview on monomer  $[8+H]^+$  MS<sup>2</sup> experiments with FT-ICR.

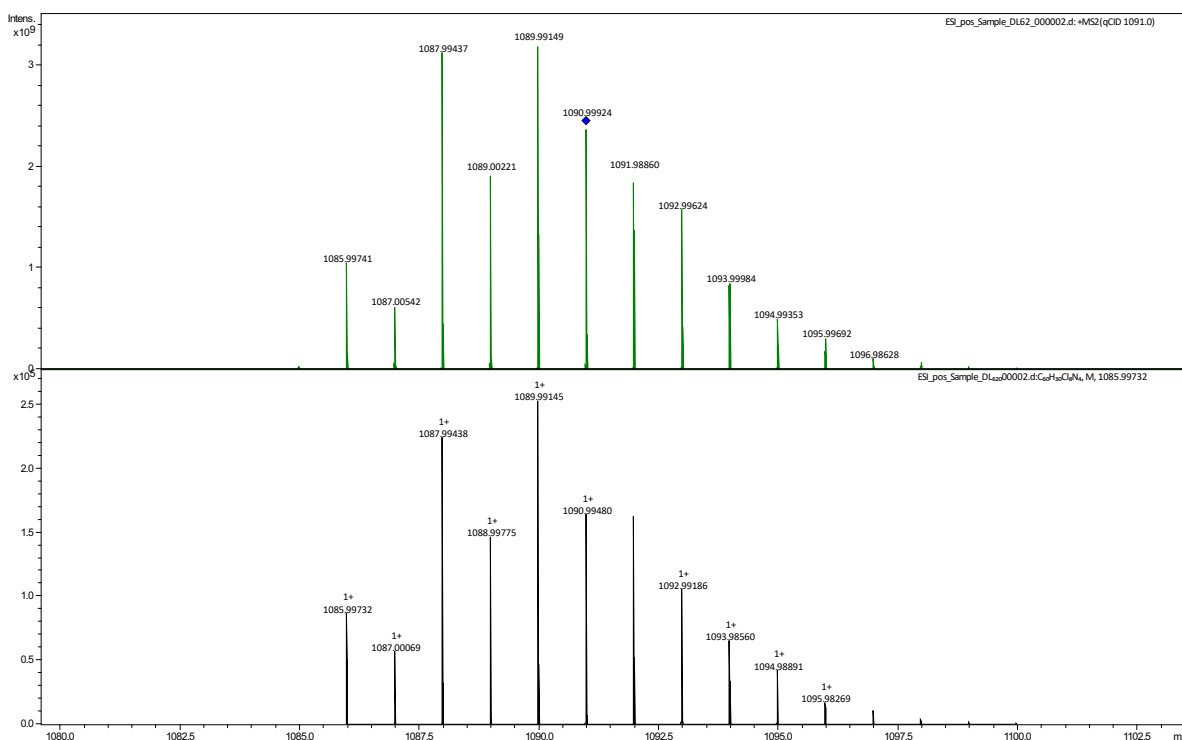

**Figure S35.** HRMS spectrum (top) and simulated spectrum of  $[8]^{++}$  (bottom); protonated species is already dissociated.

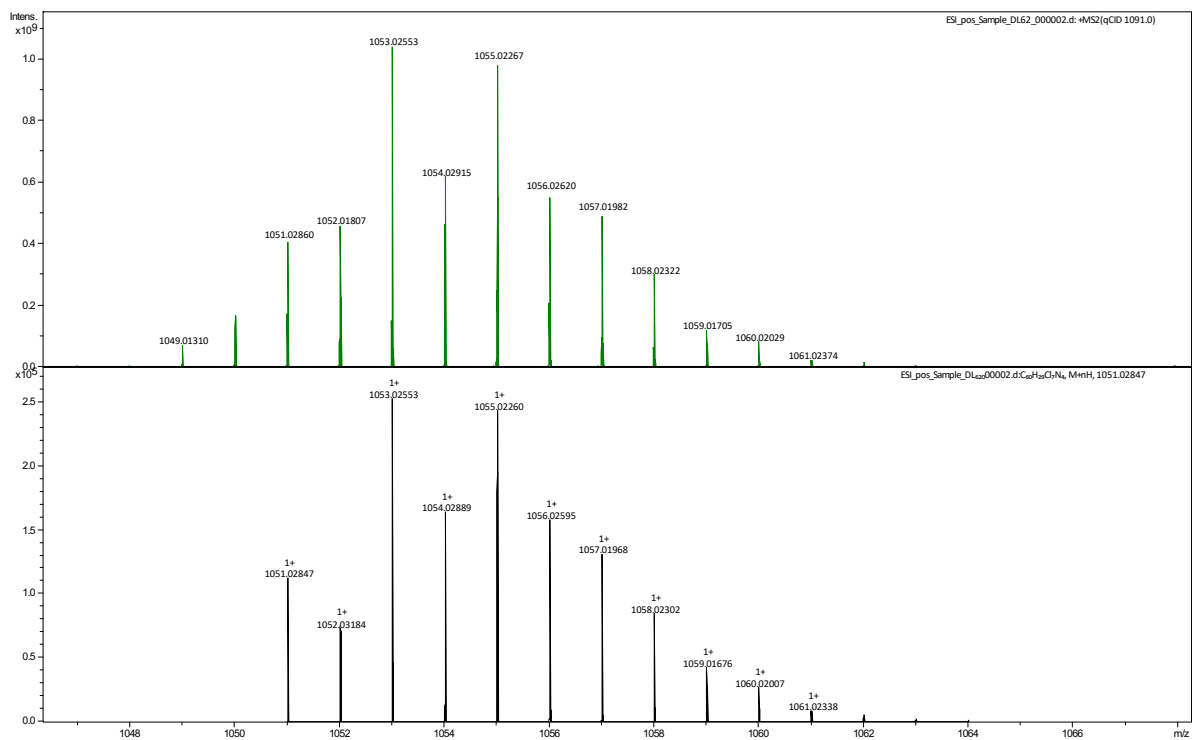

Figure S36. HRMS spectrum (top) and simulated spectrum of  $[8+H-HCl]^+$  (bottom).

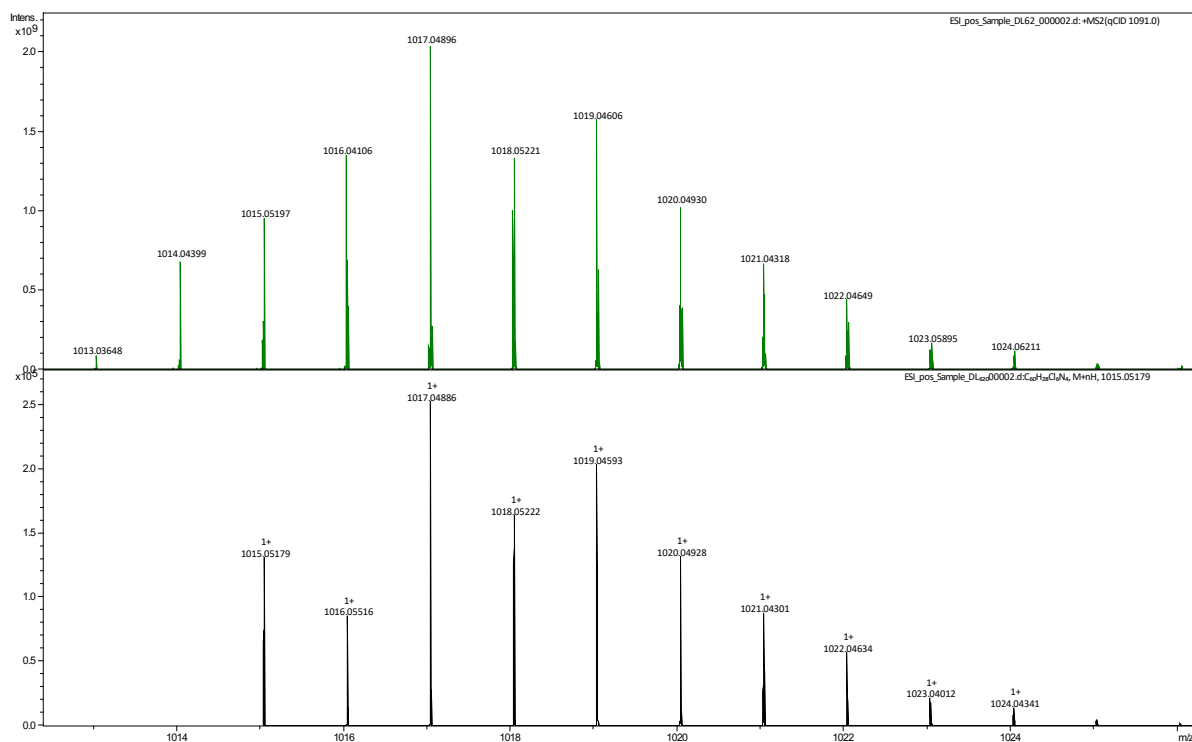

Figure S37. HRMS spectrum (top) and simulated spectrum of  $[8+H-2HCl]^+$  (bottom).



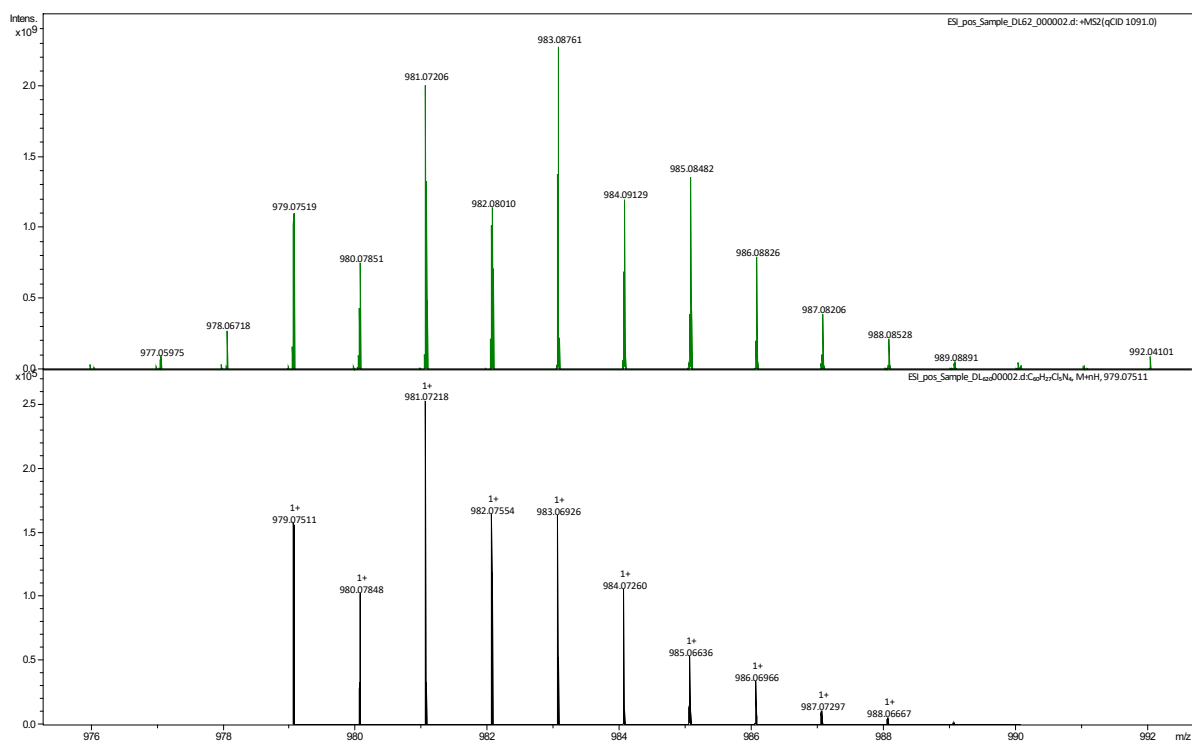

Figure S38. HRMS spectrum (top) and simulated spectrum of  $[8+H-3HCl]^+$  (bottom).

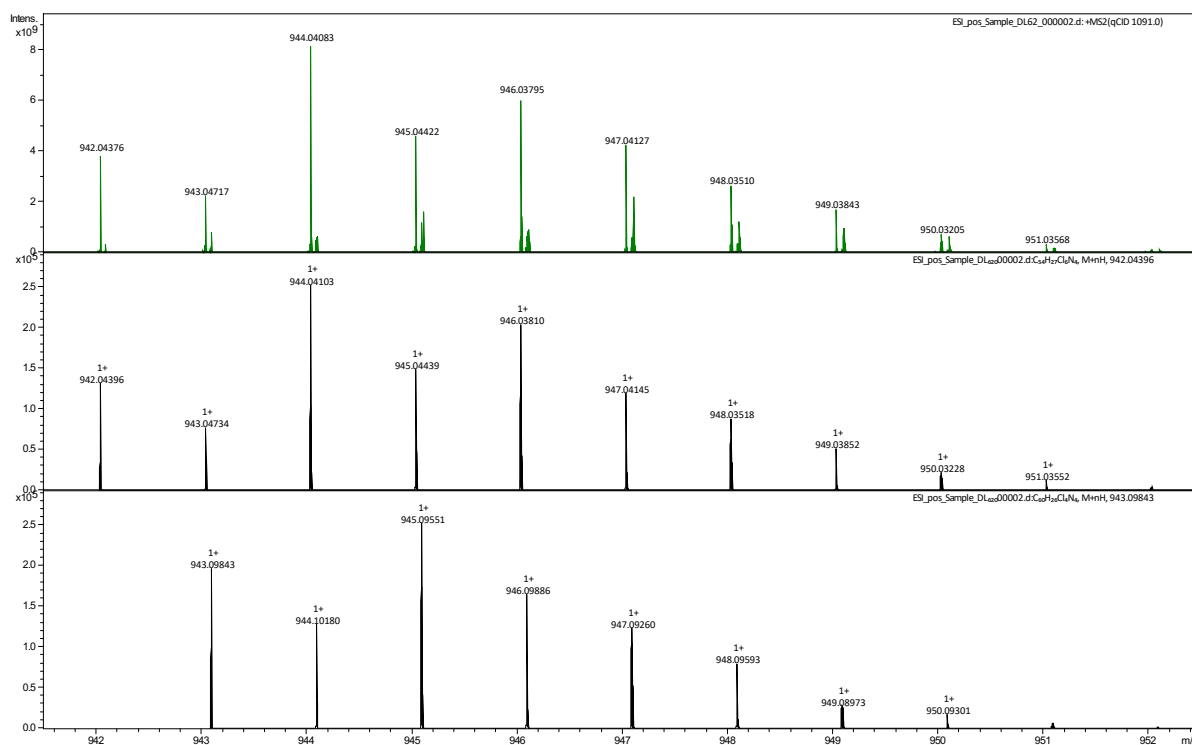

Figure S39. HRMS spectrum (top), simulated spectrum of  $[8+H-4HCl]^+$  (middle), and simulated spectrum of  $[8+H-C_6H_3Cl_2]^+$  (bottom).

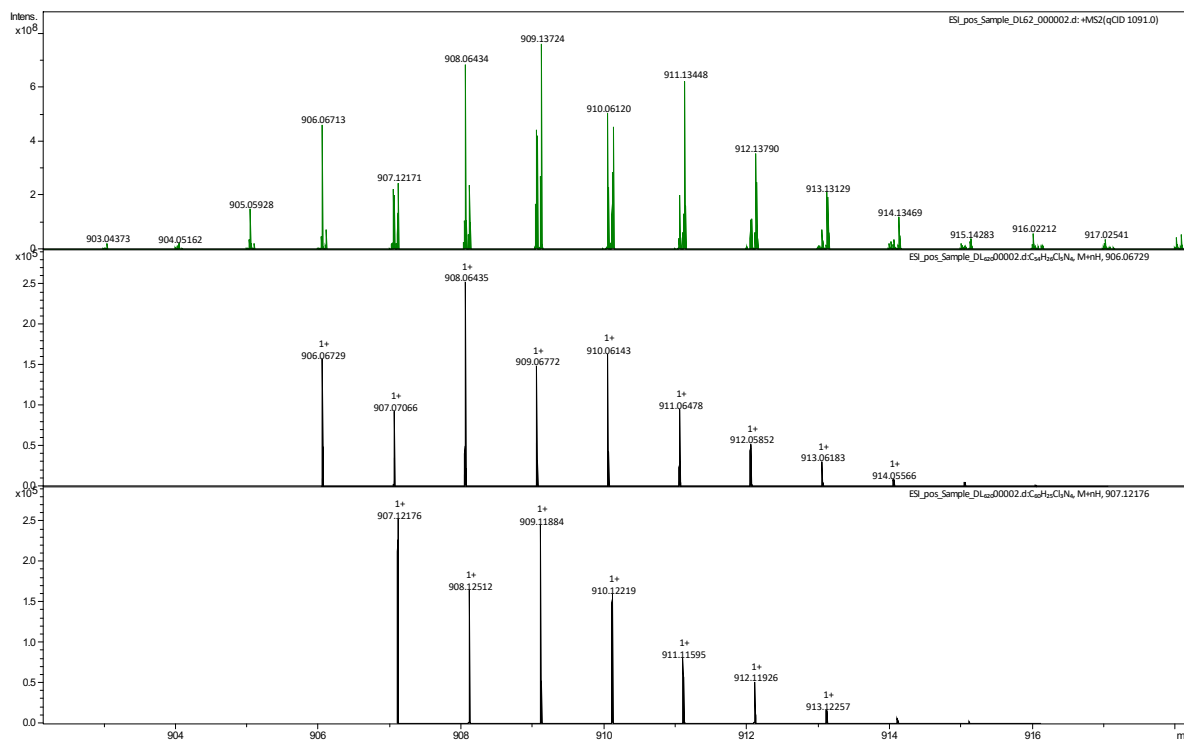

**Figure S40.** HRMS spectrum (top), simulated spectrum of  $[8+H-5HCl]^+$  (middle), and simulated spectrum of  $[8+H-C_6H_3Cl_2-HCl]^+$  (bottom).

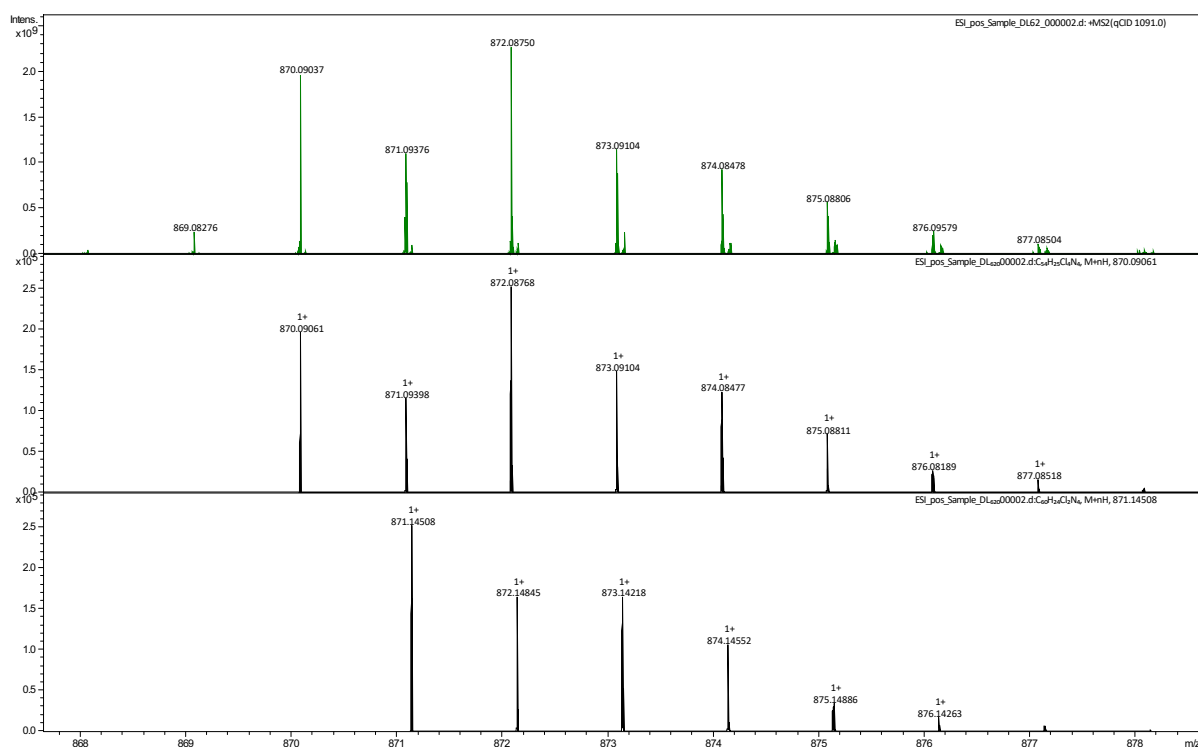

**Figure S41.** HRMS spectrum (top), simulated spectrum of  $[8+H-6HCl]^+$  (middle), and simulated spectrum of  $[8+H-C_6H_3Cl_2-2HCl]^+$  (bottom).

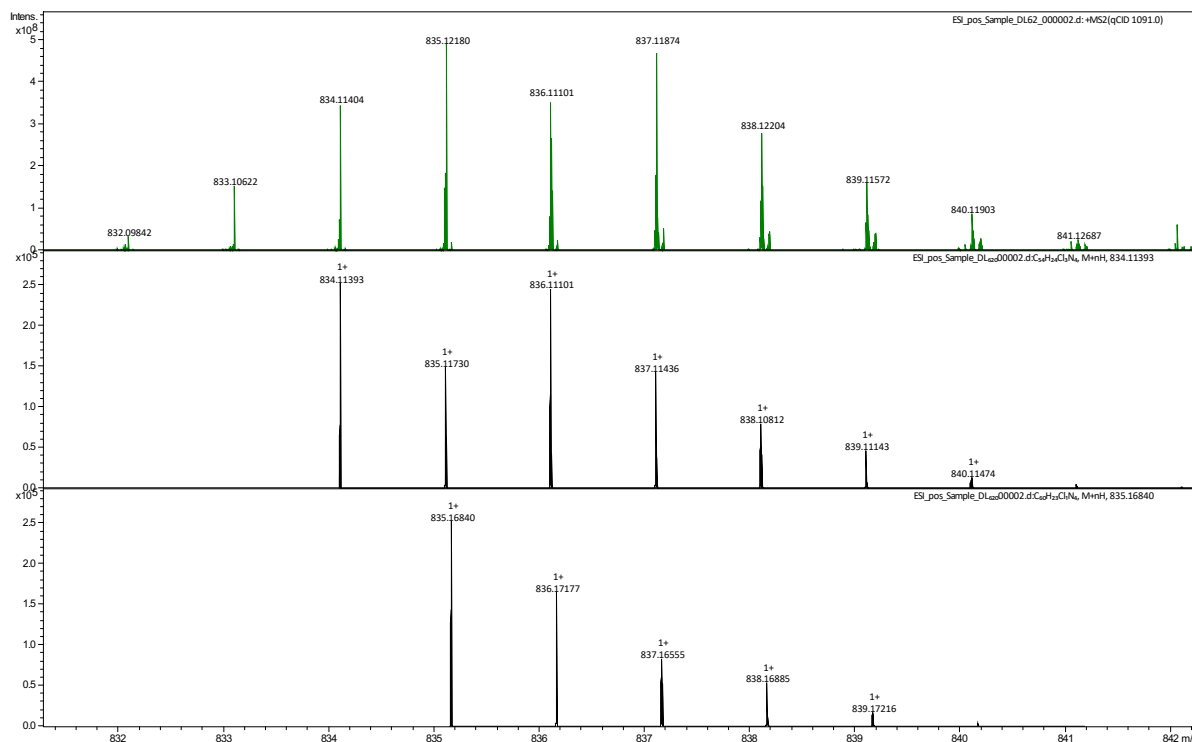

**Figure S42.** HRMS spectrum (top), simulated spectrum of  $[8+H-7HCl]^+$  (middle), and simulated spectrum of  $[8+H-C_6H_3Cl_2-4HCl]^+$  (bottom).

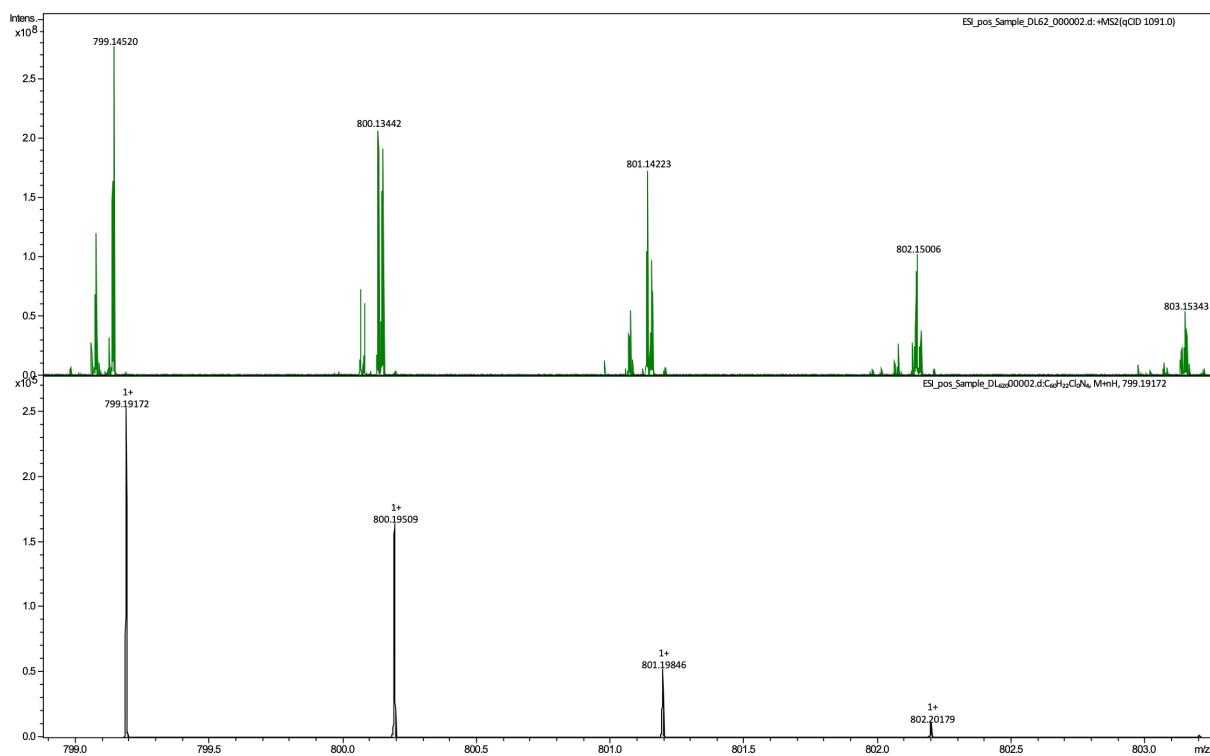

**Figure S43.** HRMS spectrum (top) and simulated spectrum  $[8+H-8HCl]^+$  (bottom); no matching signal at loss of 8 HCl.

## FT-ICR experiments with 8Pd

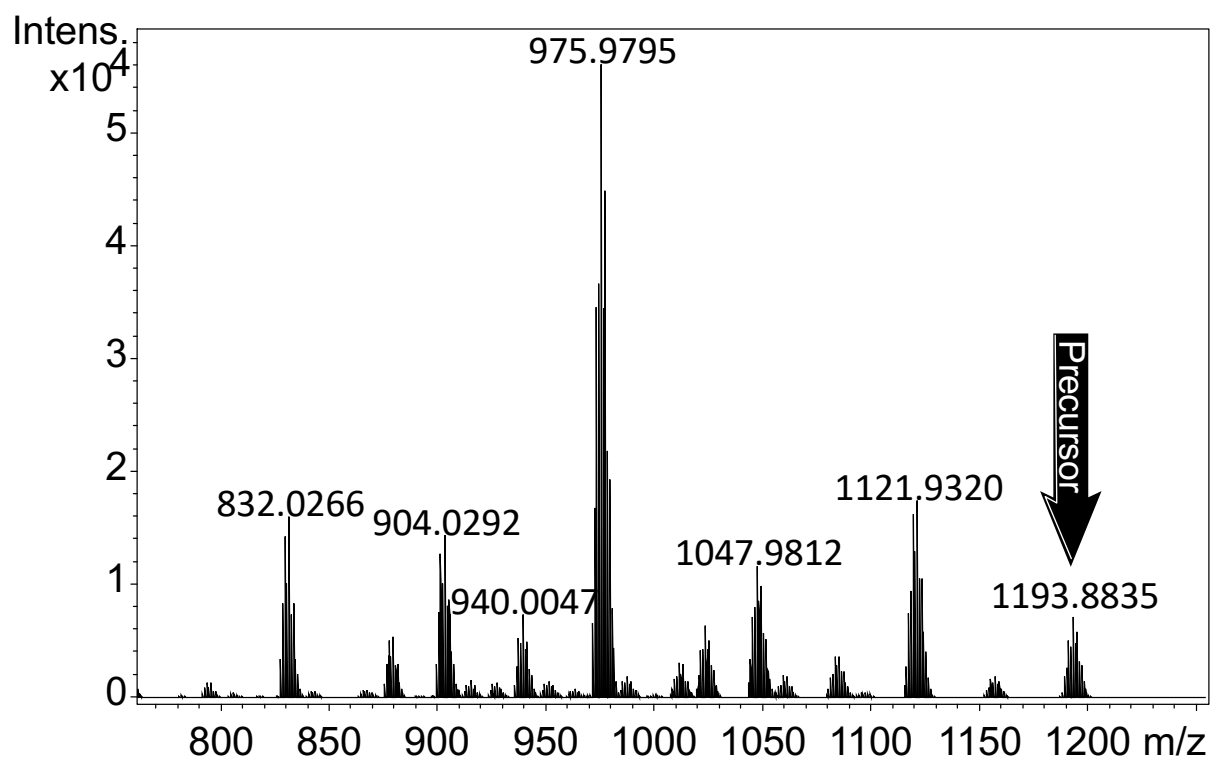

Figure S44. Overview on monomer[8Pd]<sup>++</sup> MS<sup>2</sup> experiments with FT-ICR.

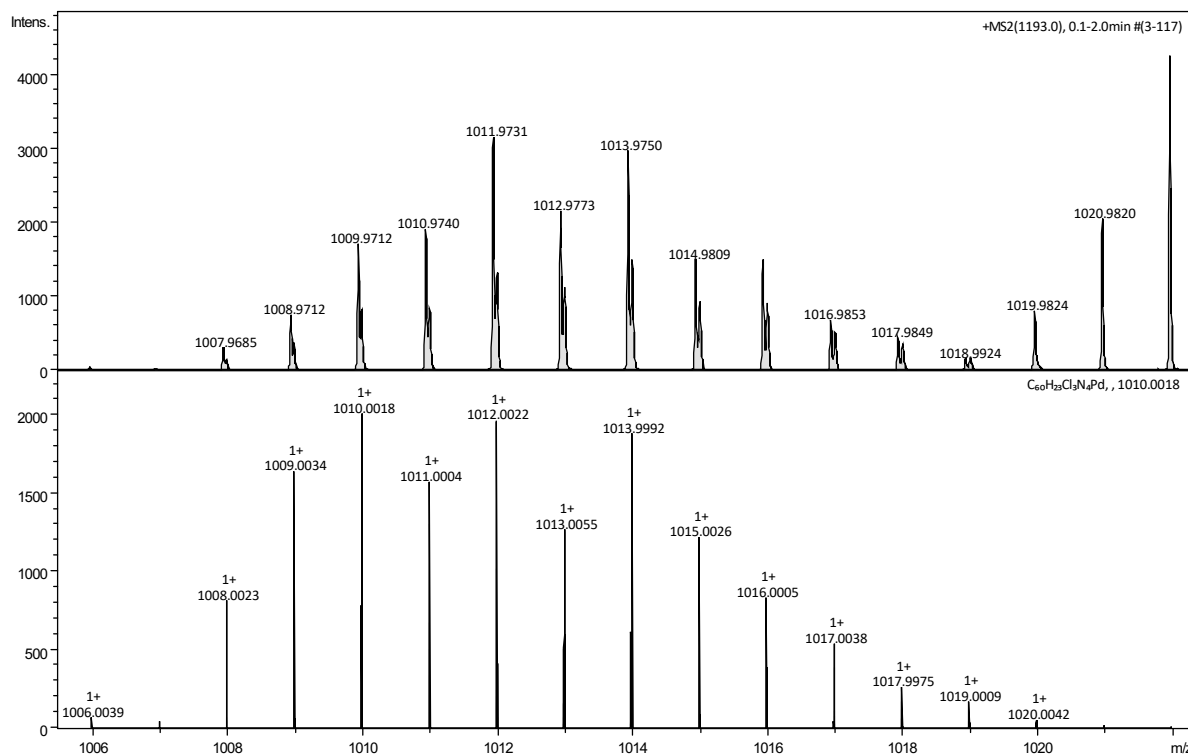

Figure S45. HRMS spectrum (top) and simulated spectrum [8Pd-5HCl]<sup>++</sup> (bottom).

## 2.3 Chapter S3 – Dissociation Experiments of 1, 1Co, 1Cu, 1Zn, 2, 7, and Ref

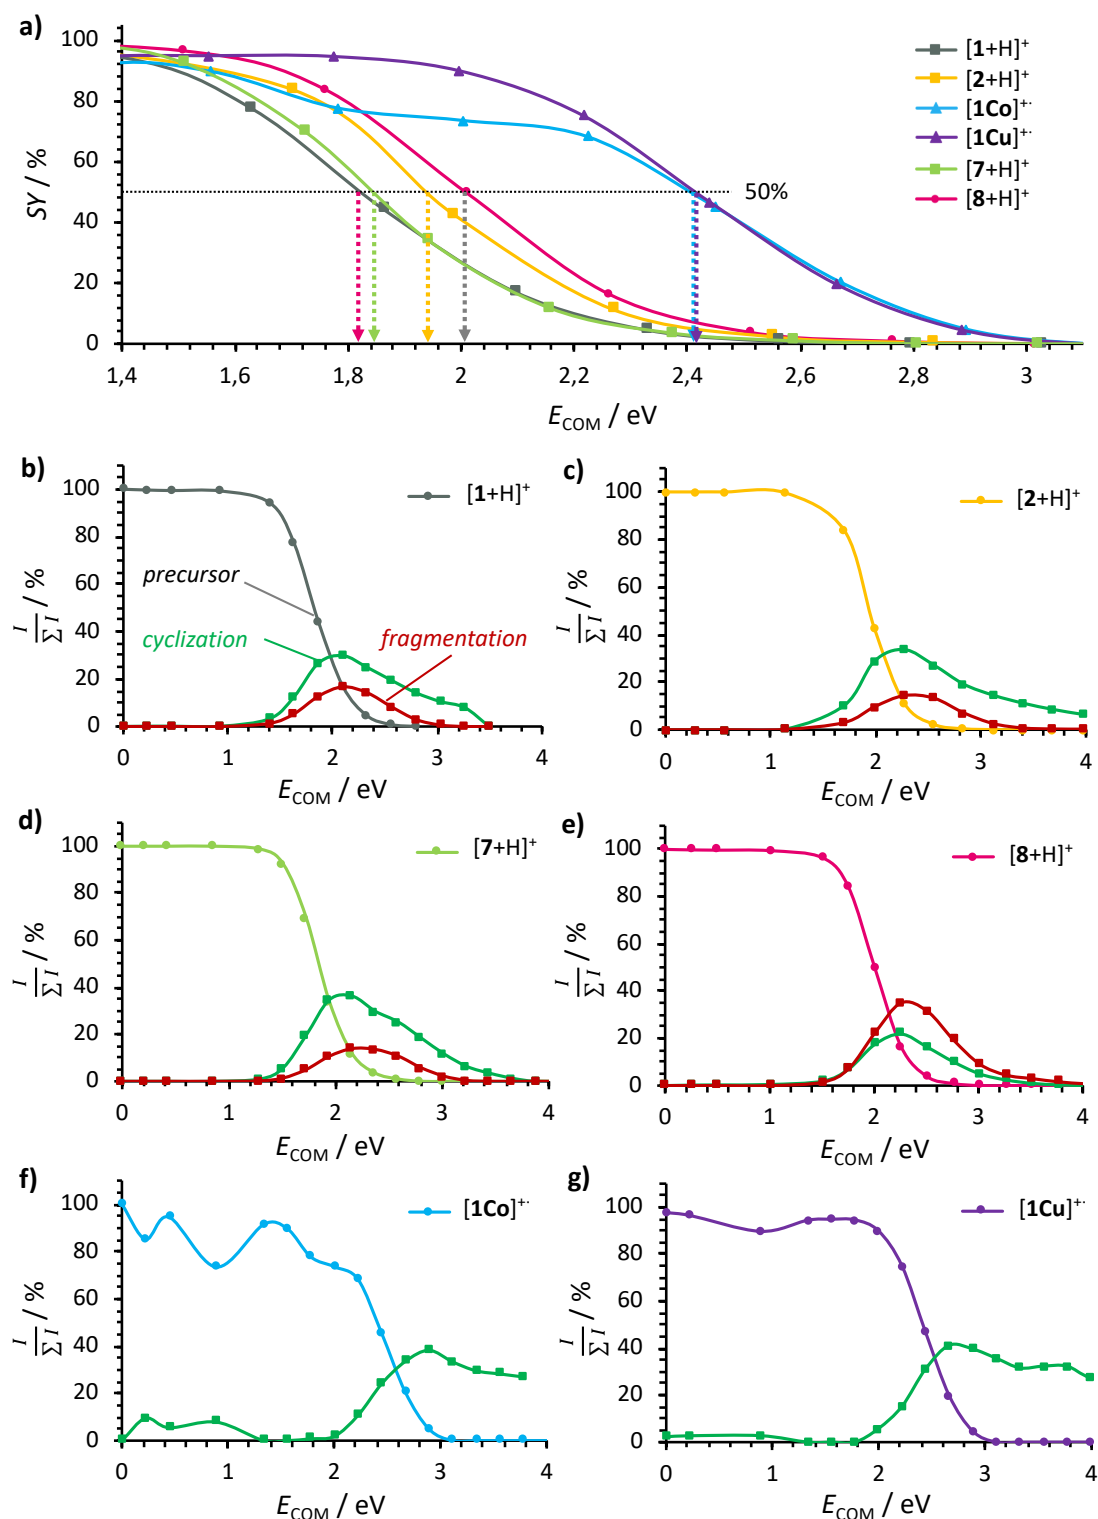

**Figure S46.** Energy-dependent CID breakdown graphs: a) zoom-in in the precursor ion region (survival yield, SY); b) [1+H]<sup>+</sup>; c) [2+H]<sup>+</sup>; d) [7+H]<sup>+</sup>; e) [8+H]<sup>+</sup>; f) [1Co]<sup>+</sup>; g) [1Cu]<sup>+</sup>. The precursor in b-e is depicted in black, the products of 1-8 cyclization steps in green and the side-reaction of the aryl-radical fragmentation in red; x-axis: center-of-mass collision energy ( $E_{COM}$ ) and y-axis: ratio of precursor or fragment ion intensity over the sum of intensities of all signals ( $I/\sum I$ ).

## FT-ICR experiments with 2

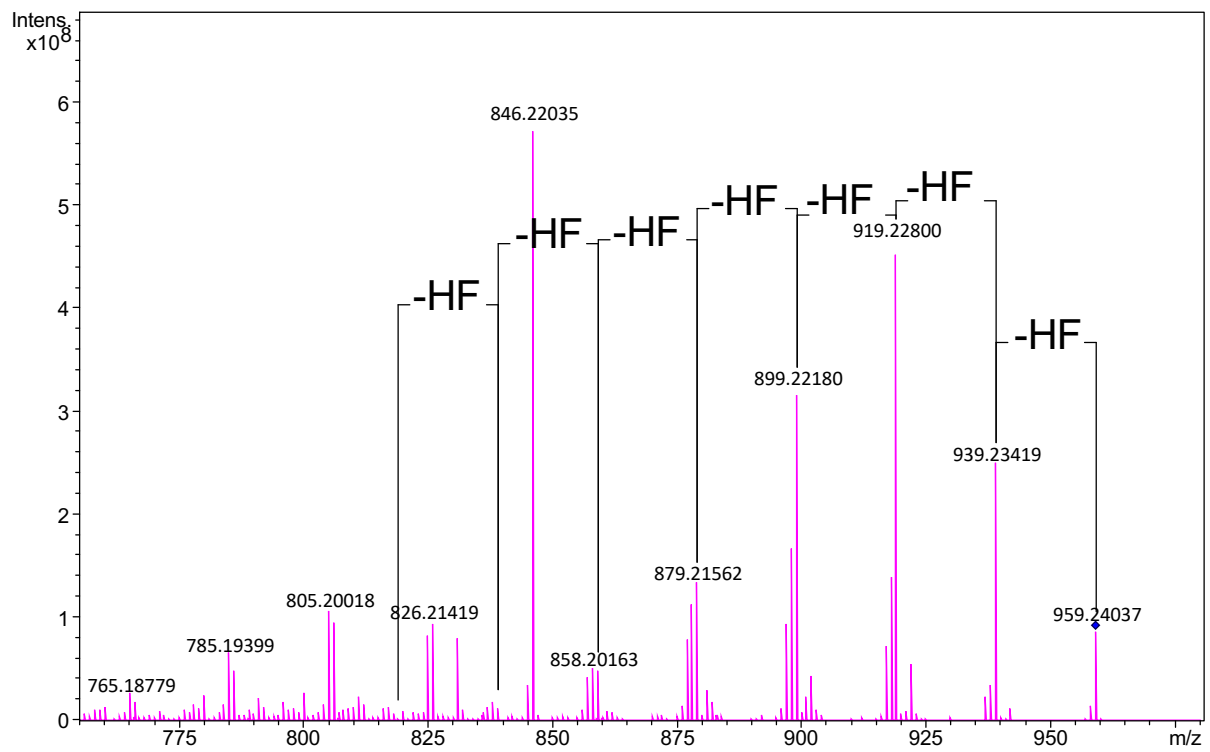

Figure S47. Overview on monomer  $[2+H]^+$  MS<sup>2</sup> experiments with FT-ICR.

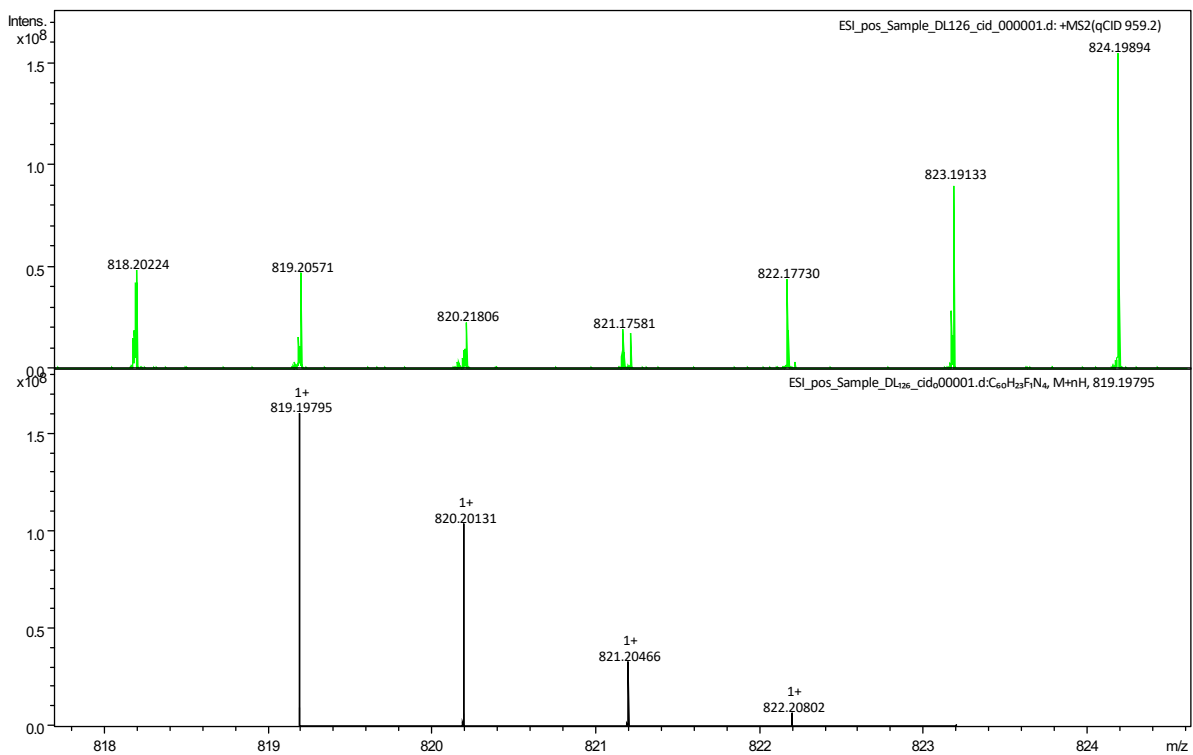

Figure S48. HRMS spectrum (top) and simulated spectrum  $[2+H-7HF]^+$  (bottom).

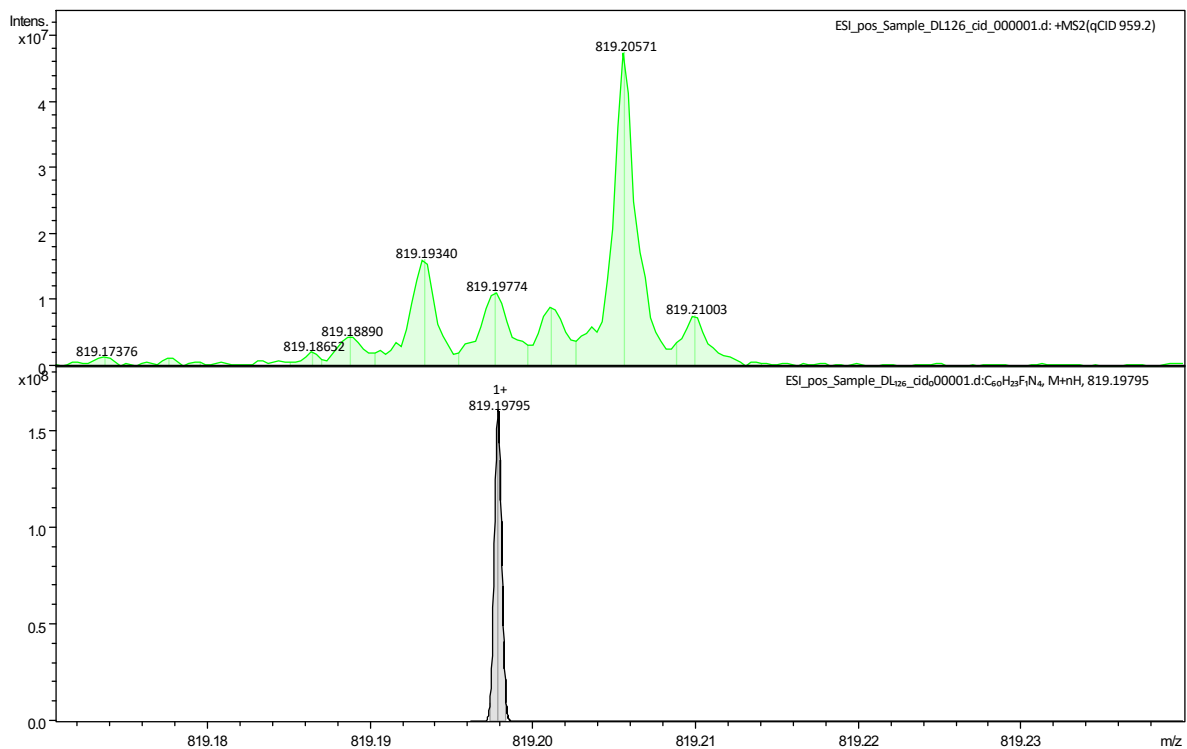

**Figure S49.** High resolution analysis of observed peak at 819 m/z (top) and simulation (bottom) of  $[2+H-7HF]^+$ .

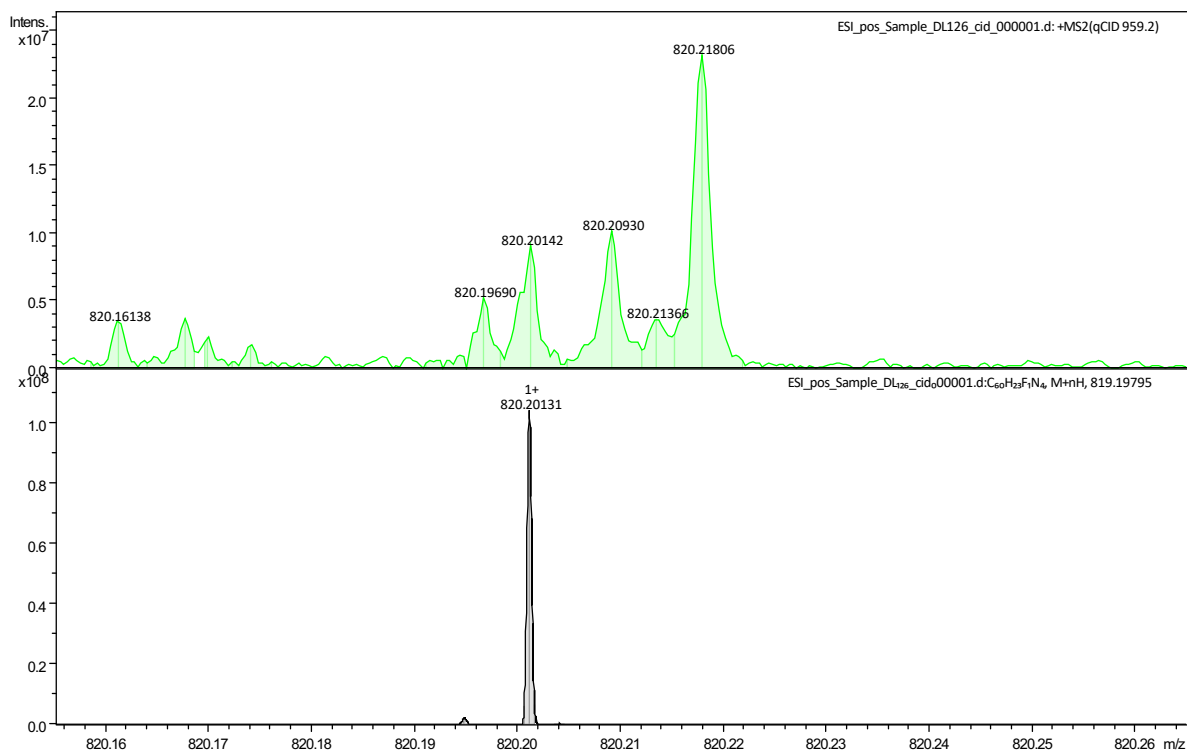

**Figure S50.** High resolution analysis of observed peak at 820 m/z (top) and simulation (bottom) of  $[2+H-7HF]^+$ .

## QTOF experiments with 1

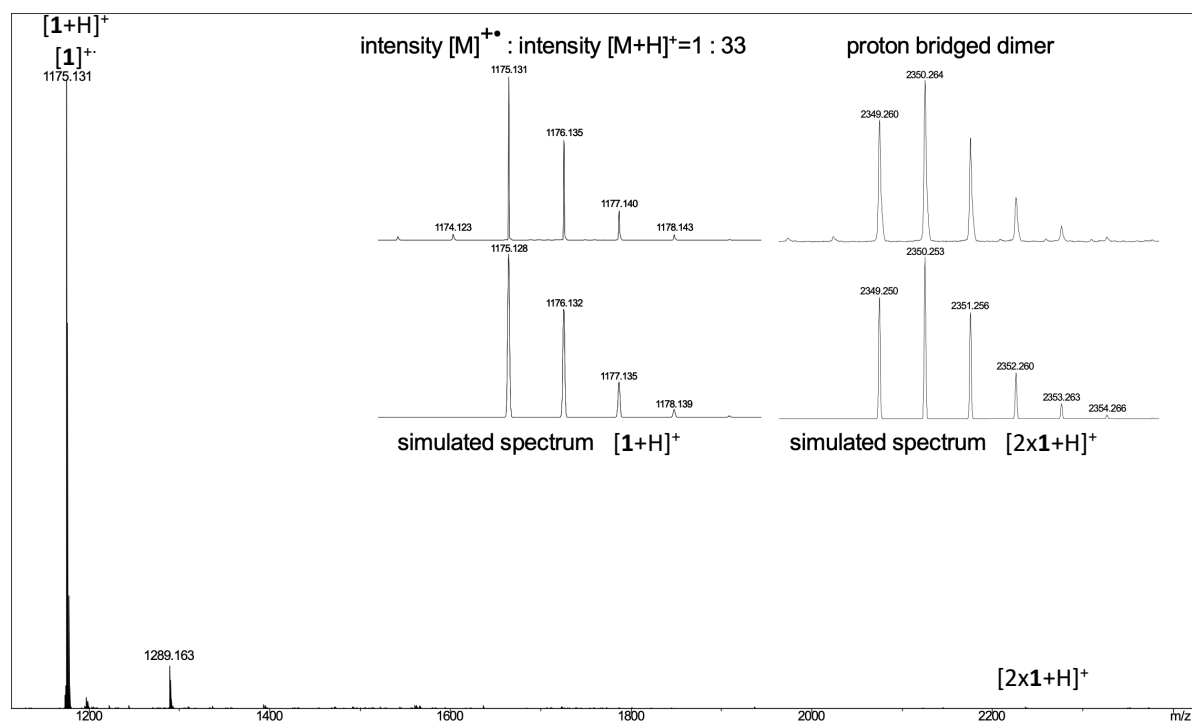

Figure S51. MS<sup>2</sup> of proton bridged dimer.

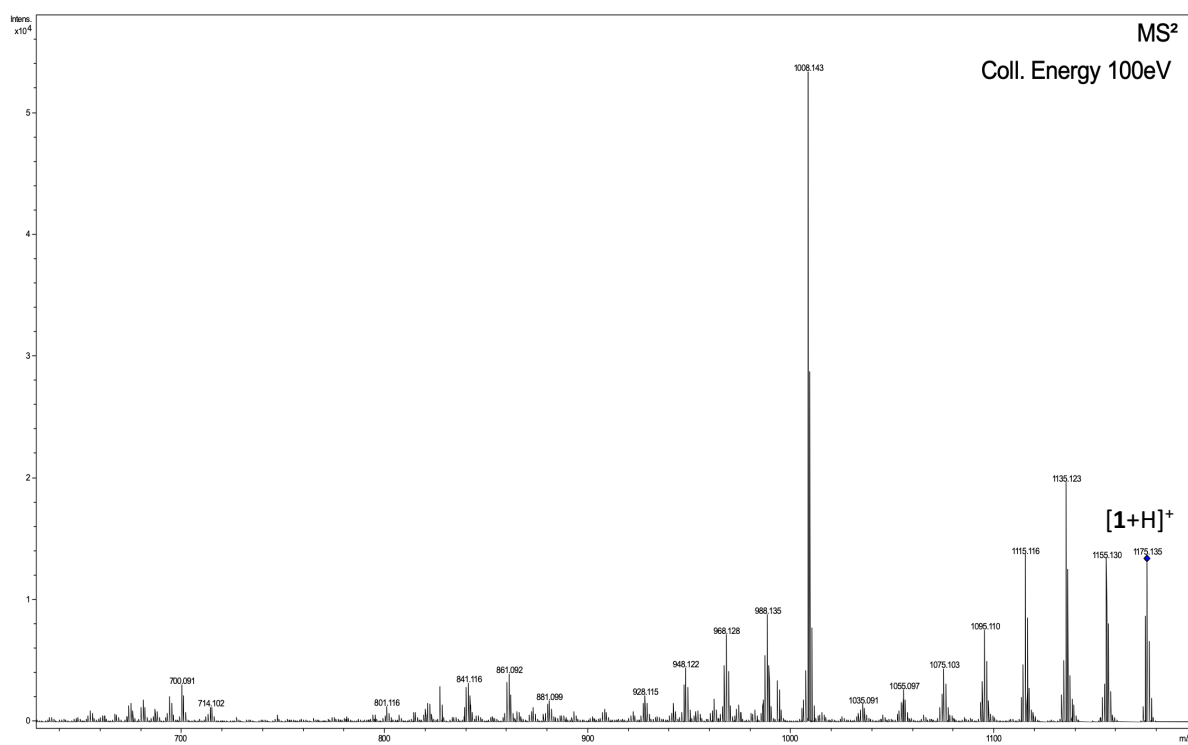

Figure S52. Overview on monomer [1+H]<sup>+</sup> MS<sup>2</sup> experiments with QTOF.



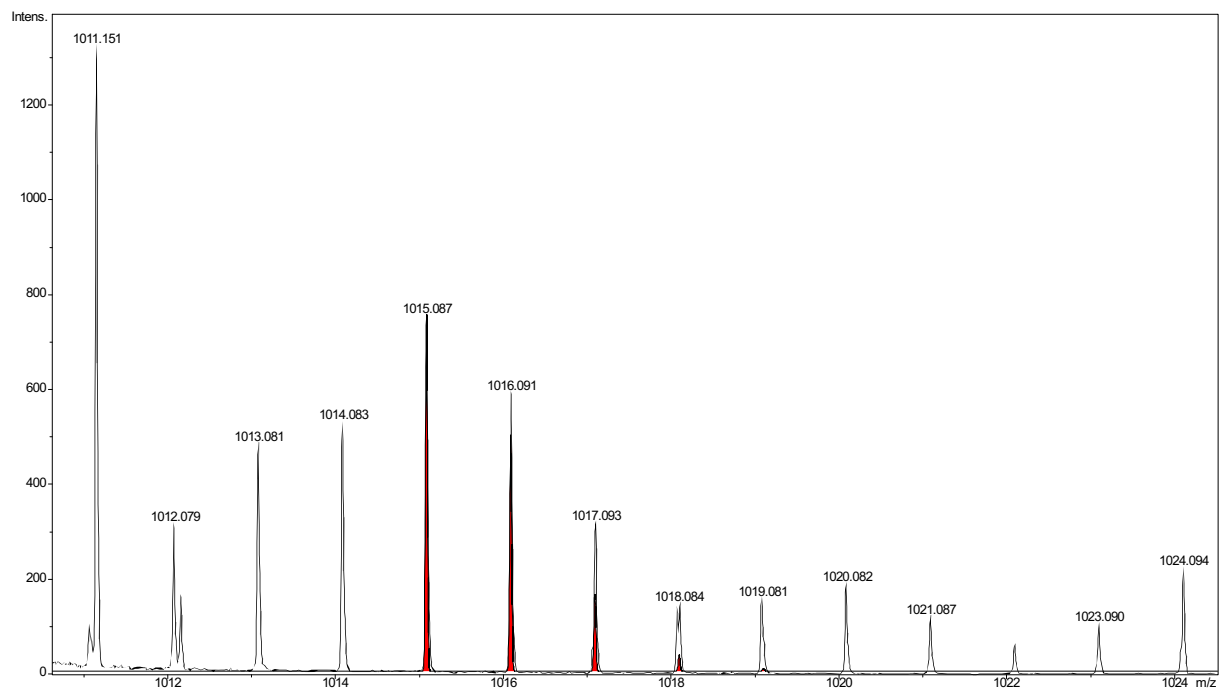

Figure S53. HRMS spectrum (black), and simulated spectrum  $[1+H-8HF]^+$  (red).

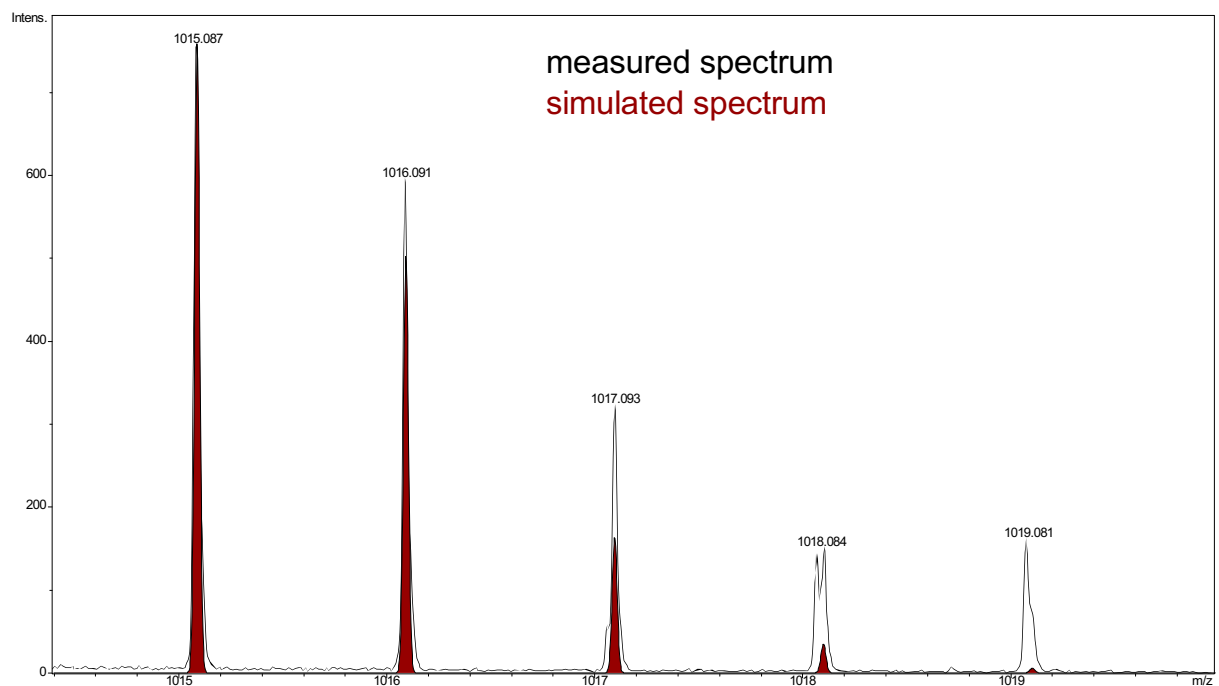

Figure S54. Zoom-in HRMS spectrum (black), and simulated spectrum  $[1+H-8HF]^+$  (red).

## FT-ICR experiments with 1

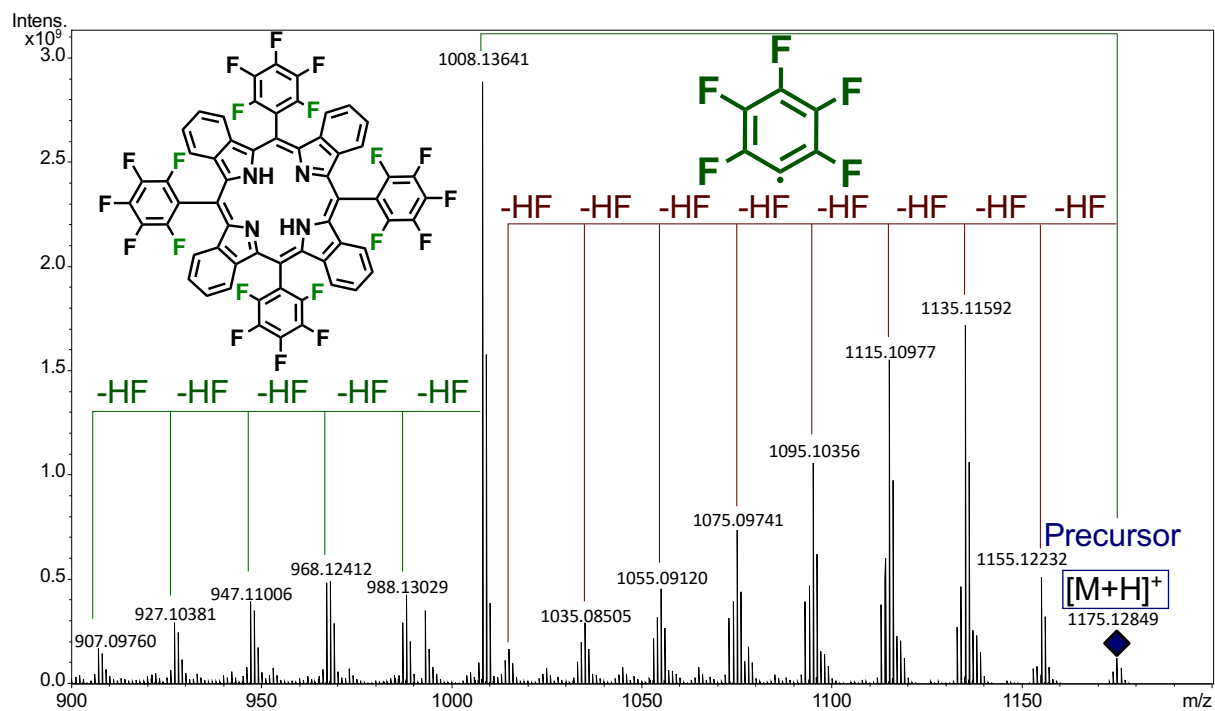

Figure S55. Overview on monomer  $[1+H]^+$   $MS^2$  experiments with FT-ICR.

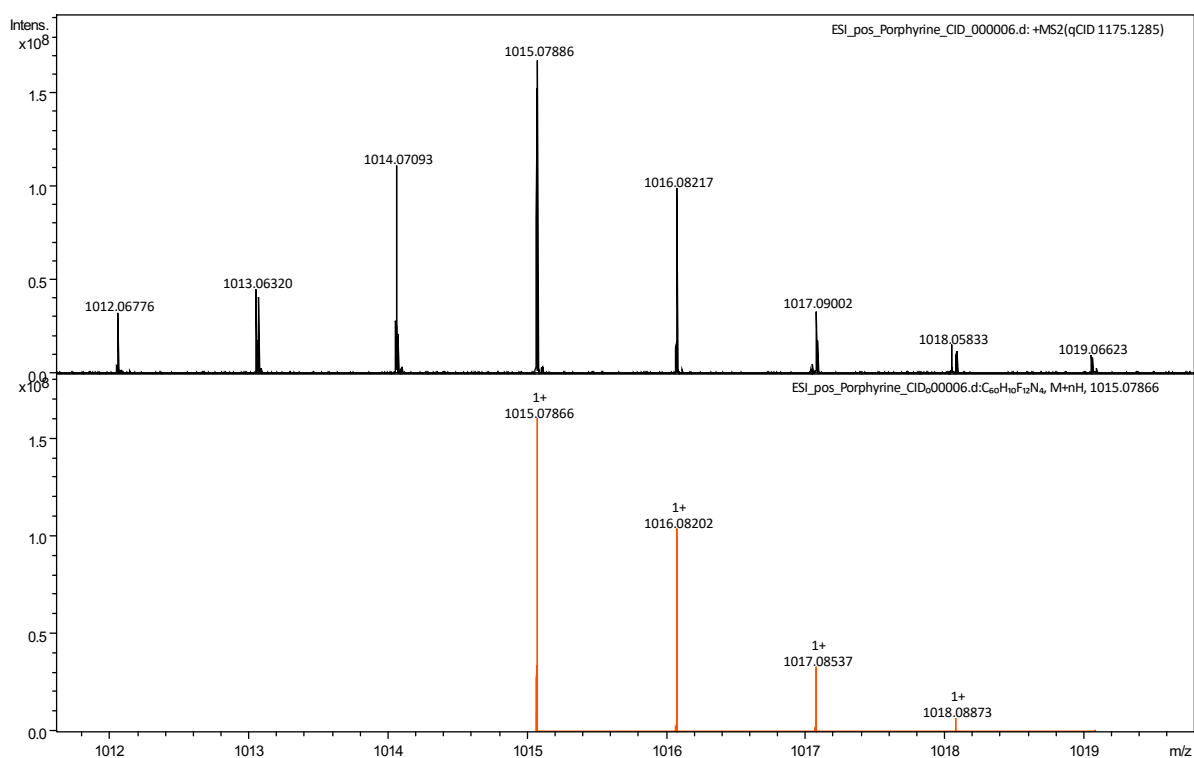

Figure S56. HRMS spectrum (top), and simulated spectrum  $[1+H-8HF]^+$  (bottom).

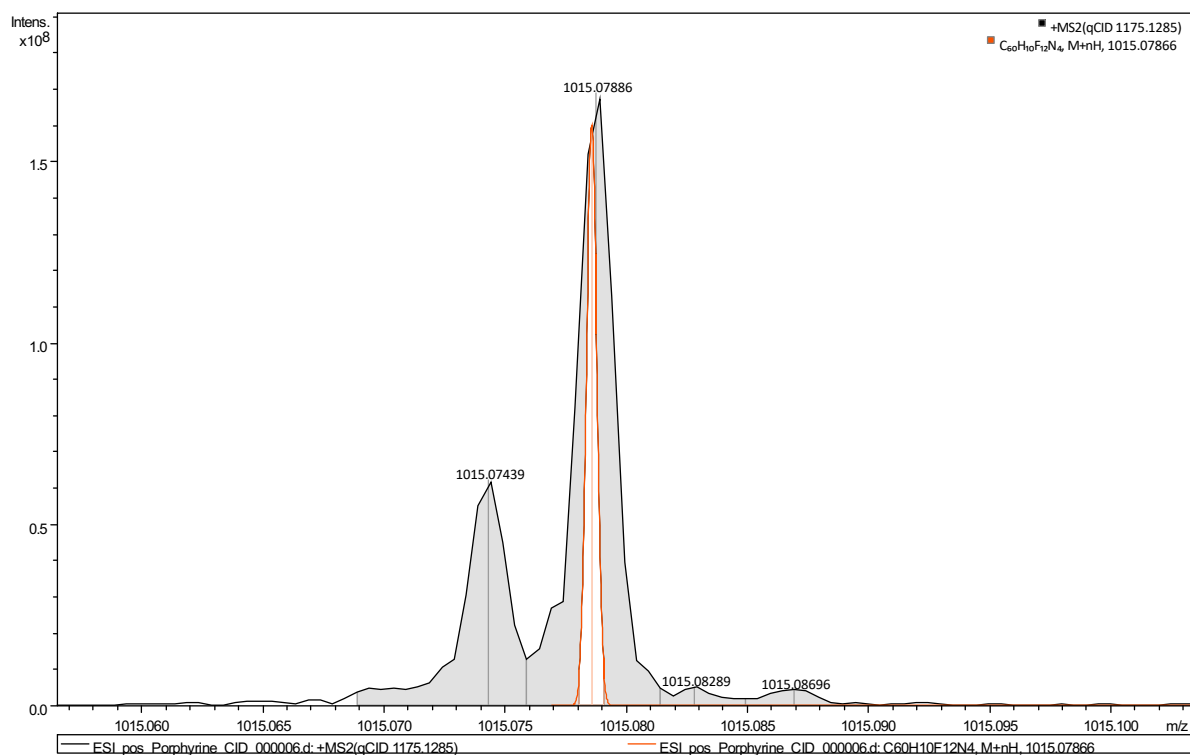

**Figure S57.** High resolution analysis of observed peak at 1015 m/z and simulation (red) of  $[1+H-8HF]^+$ .

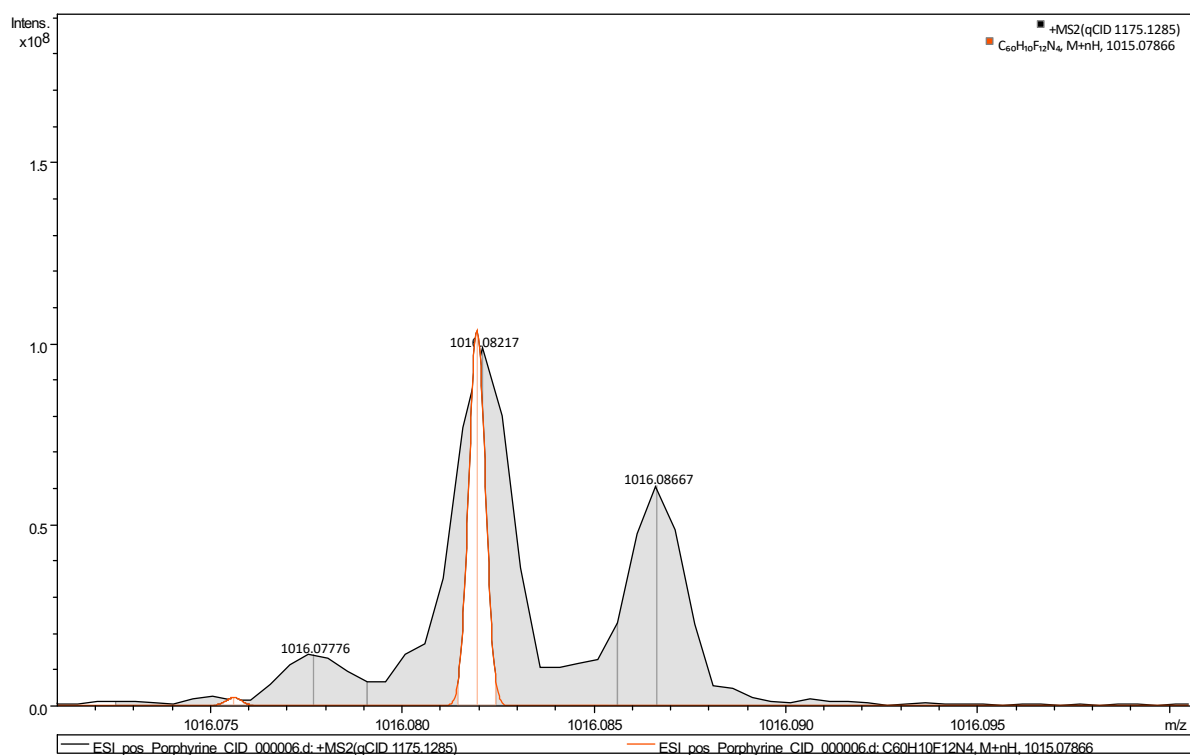

**Figure S58.** High resolution analysis of observed peak at 1016 m/z and simulation (red) of  $[1+H-8HF]^+$ .

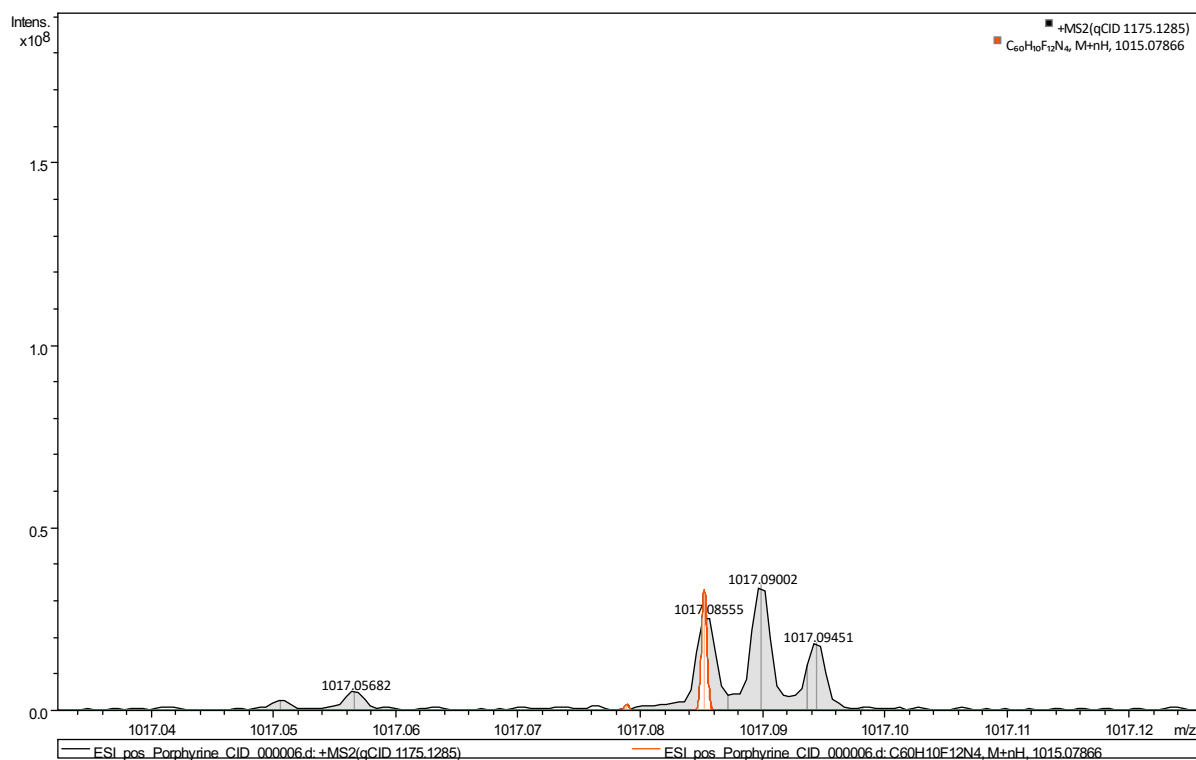

Figure S59. High resolution analysis of observed peak at 1017 m/z and simulation (red) of  $[1+H-8HF]^+$ .

## QTOF experiments with 1Co

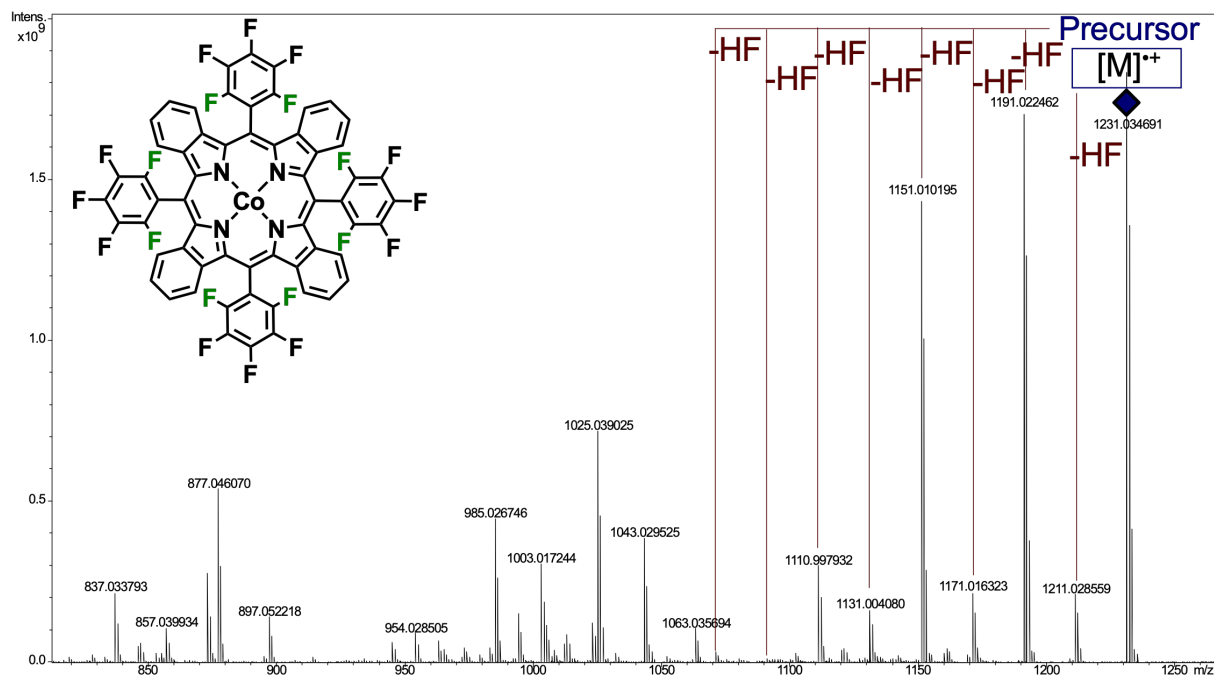

Figure S60. Overview on monomer  $[1Co]^+$  MS<sup>2</sup> experiments with QTOF.

## FT-ICR experiments with 1Co

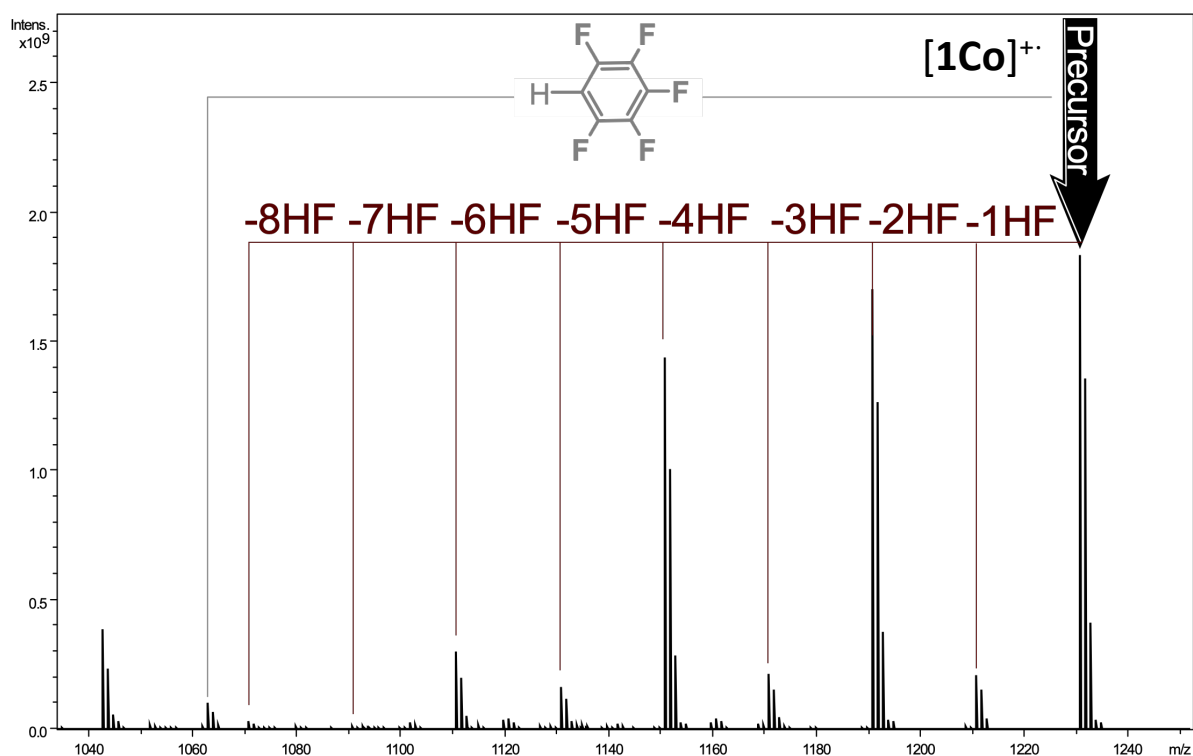

Figure S61. Overview on monomer [1Co]<sup>+•</sup> MS<sup>2</sup> experiments with FT-ICR.

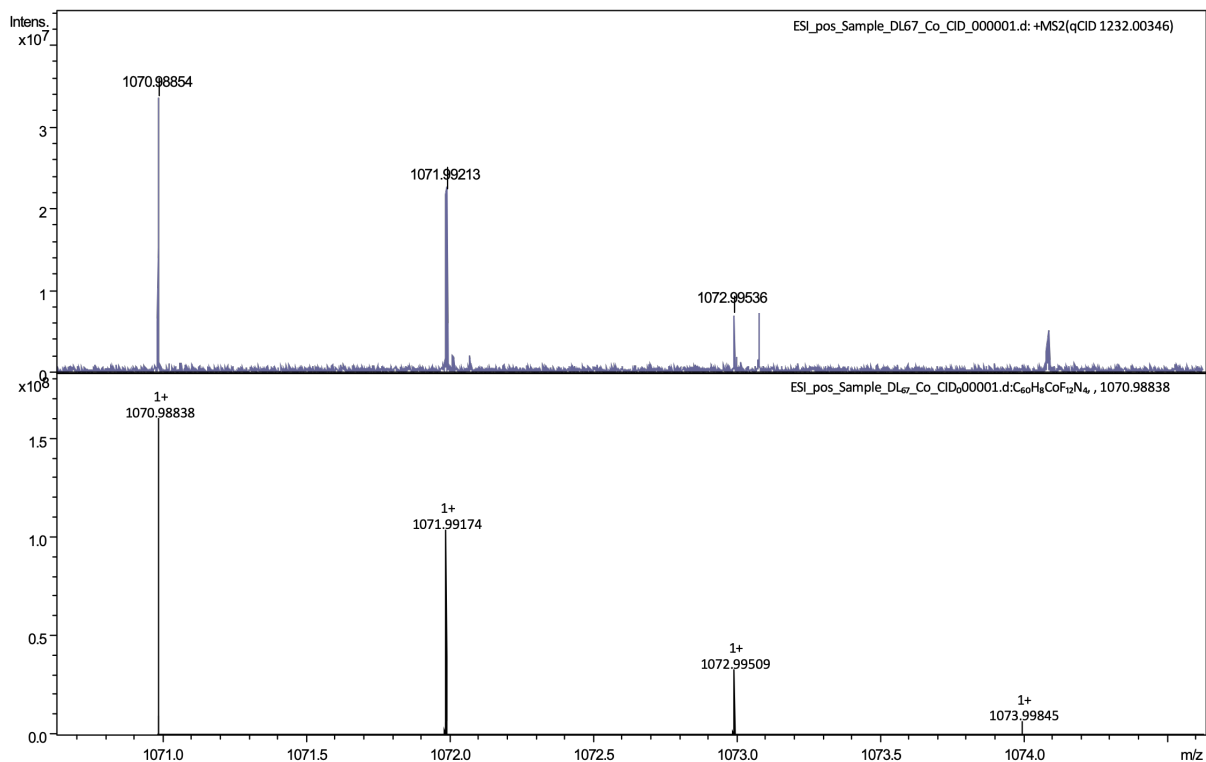

Figure S62. HRMS spectrum (top), and simulated spectrum [1Co-8HF]<sup>+•</sup> (bottom).

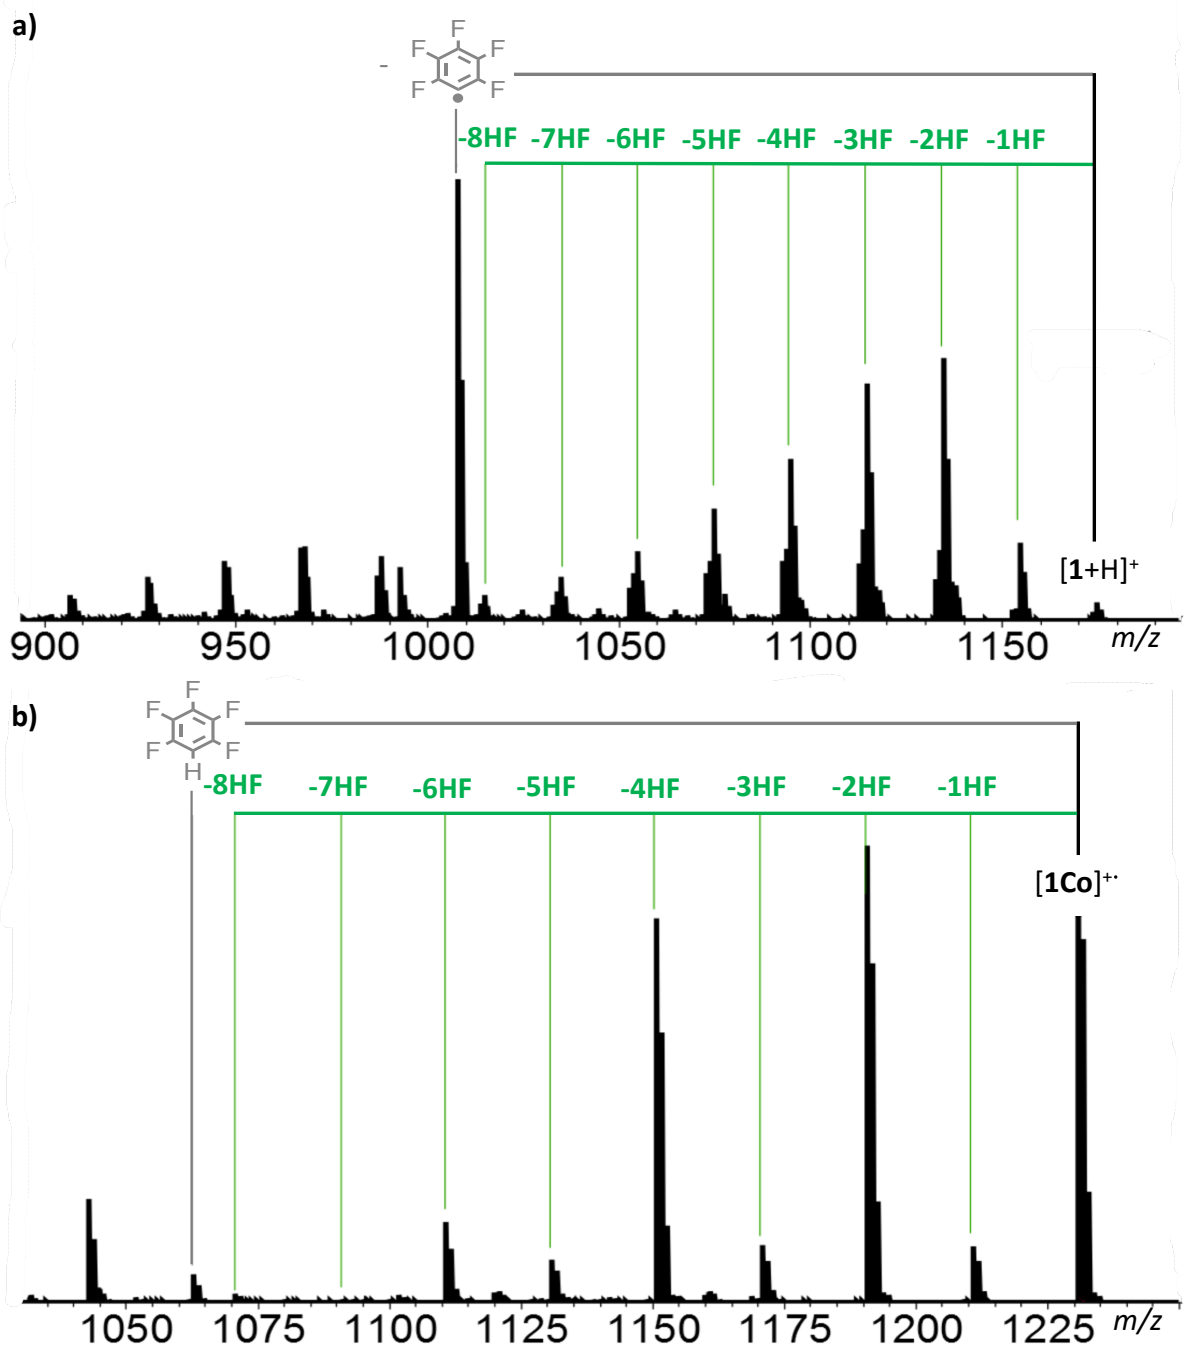

**Figure S63.** Enlarged comparative overview on MS<sup>2</sup> experiments of monomer [1+H]<sup>+</sup> (top) and [1Co]<sup>+</sup> (bottom) with FT-ICR.

## QTOF and FT-ICR experiments with 1Cu and 1Zn

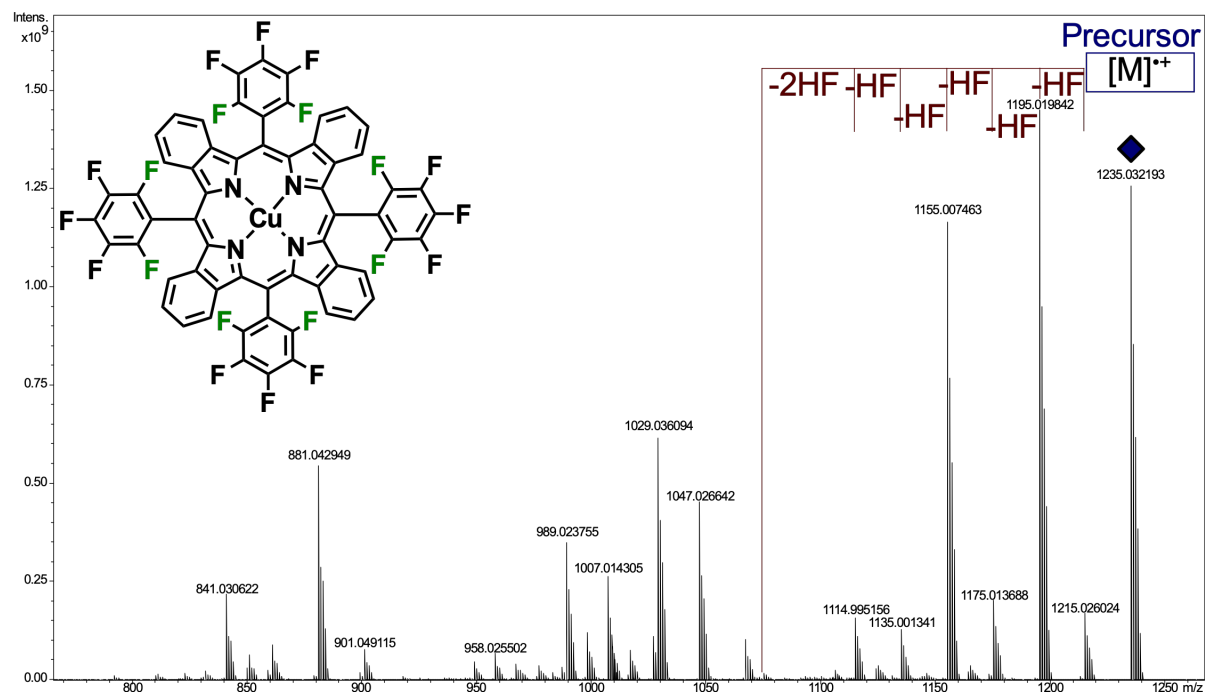

Figure S64. Overview on monomer  $[1Cu]^{++}$  MS<sup>2</sup> experiments with QTOF.

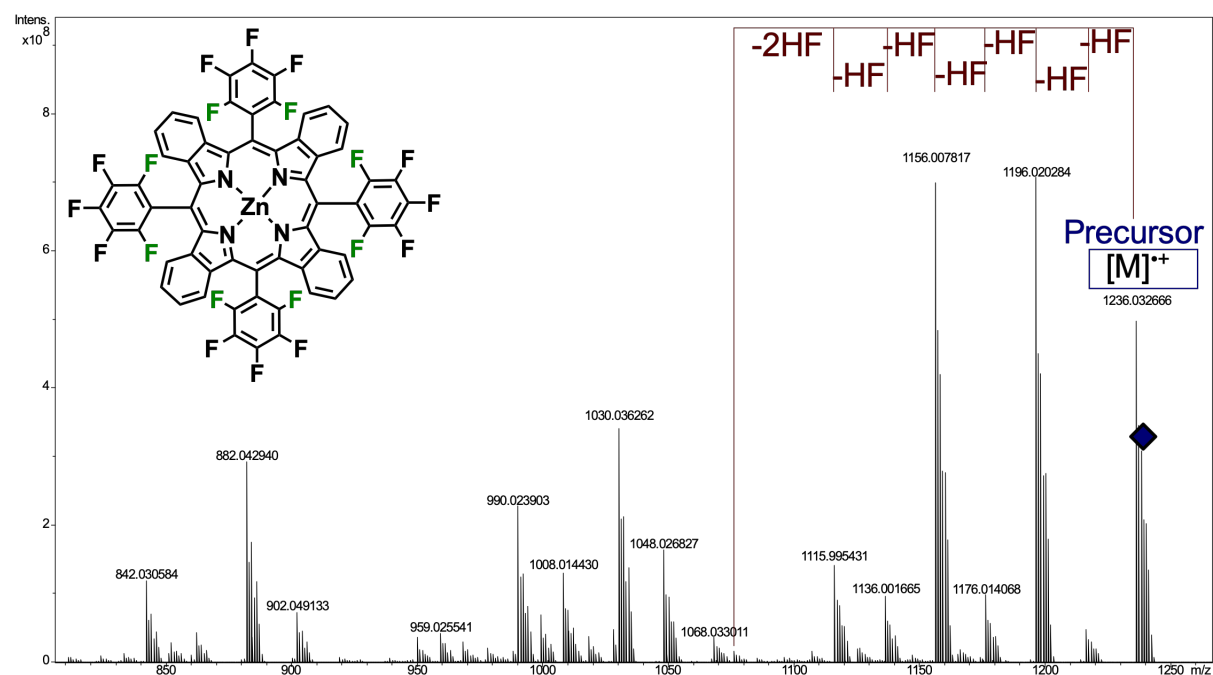

Figure S65. Overview on monomer  $[1Zn]^{++}$  MS<sup>2</sup> experiments with QTOF.

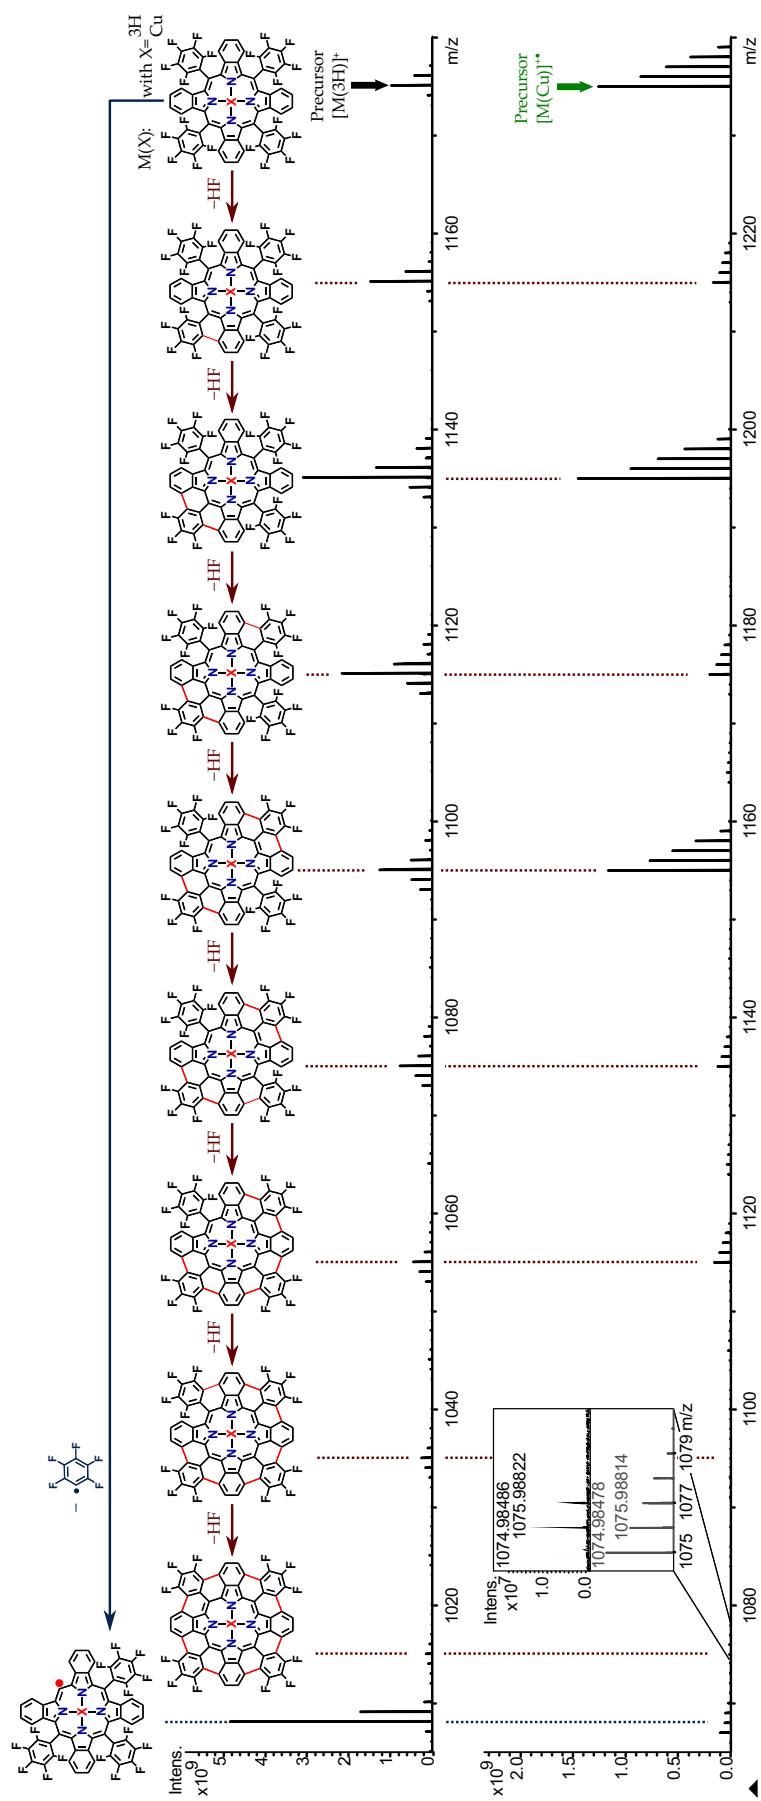

**Figure S66.** Enlarged comparative overview on MS<sup>2</sup> experiments of monomer [1+H]<sup>+</sup> (left) and [1Cu]<sup>+</sup> (right) with FT-ICR.



## QTOF Experiments with 7

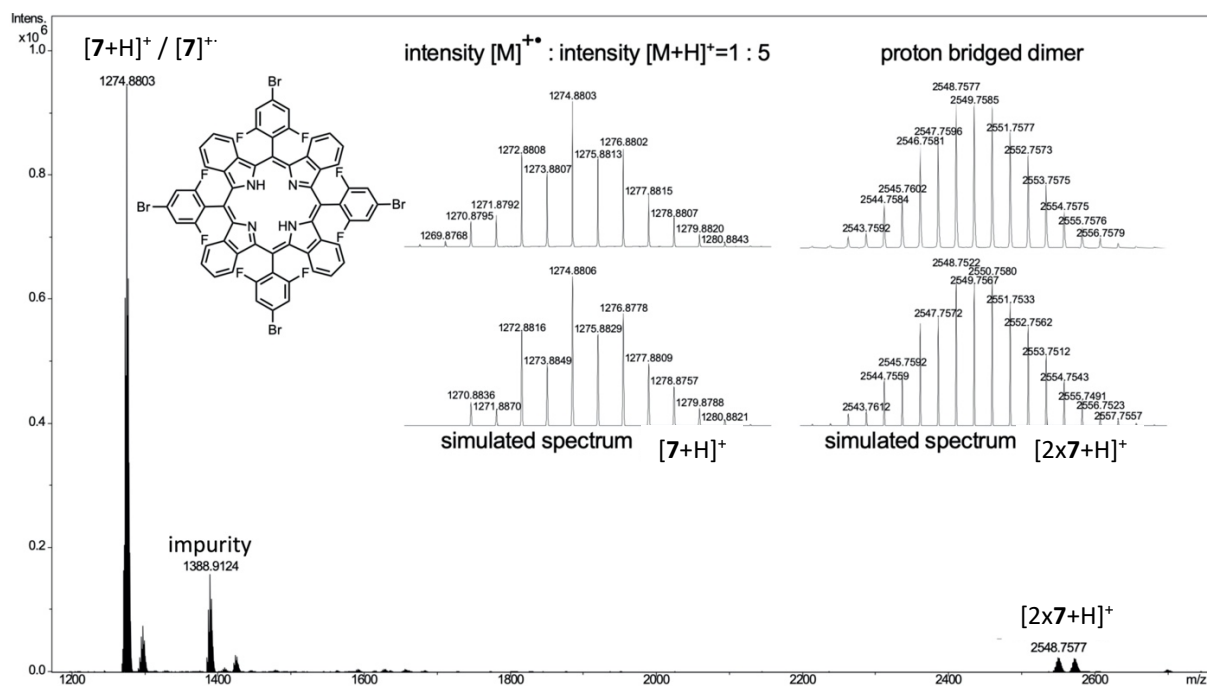

Figure S67. Analysis of precursor ion nature.

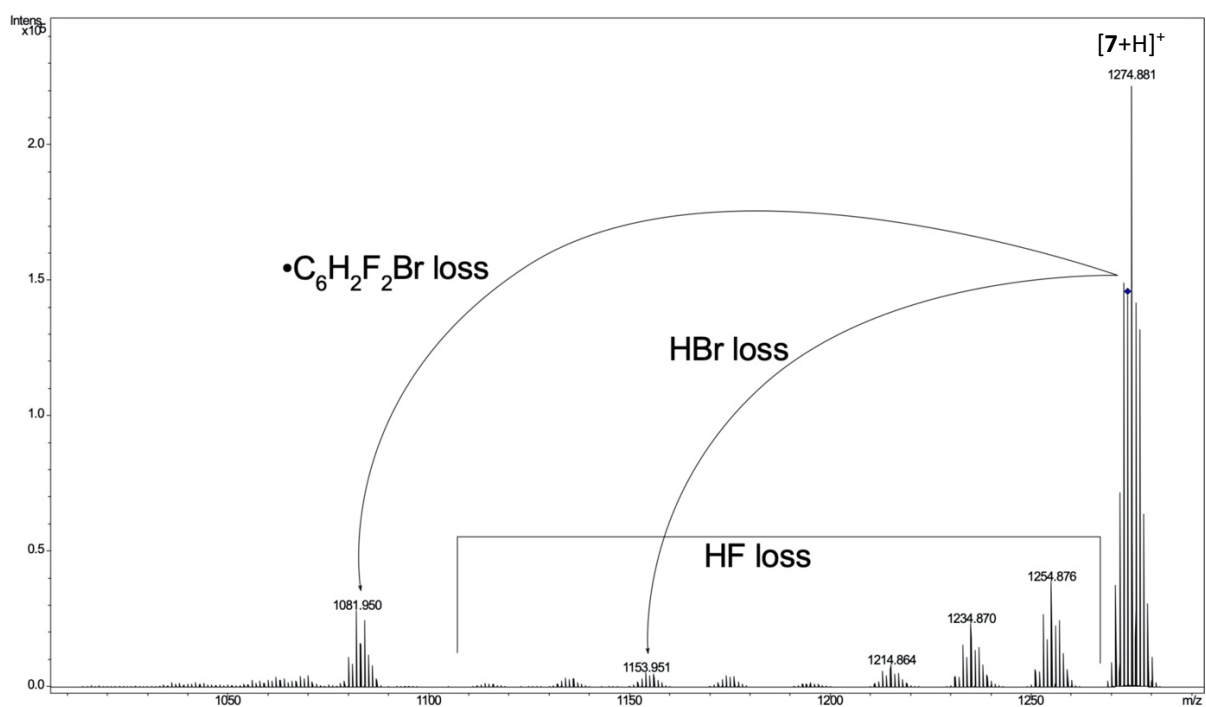

Figure S68. Overview on monomer and  $[7+H]^+$   $MS^2$  experiments with QTOF.

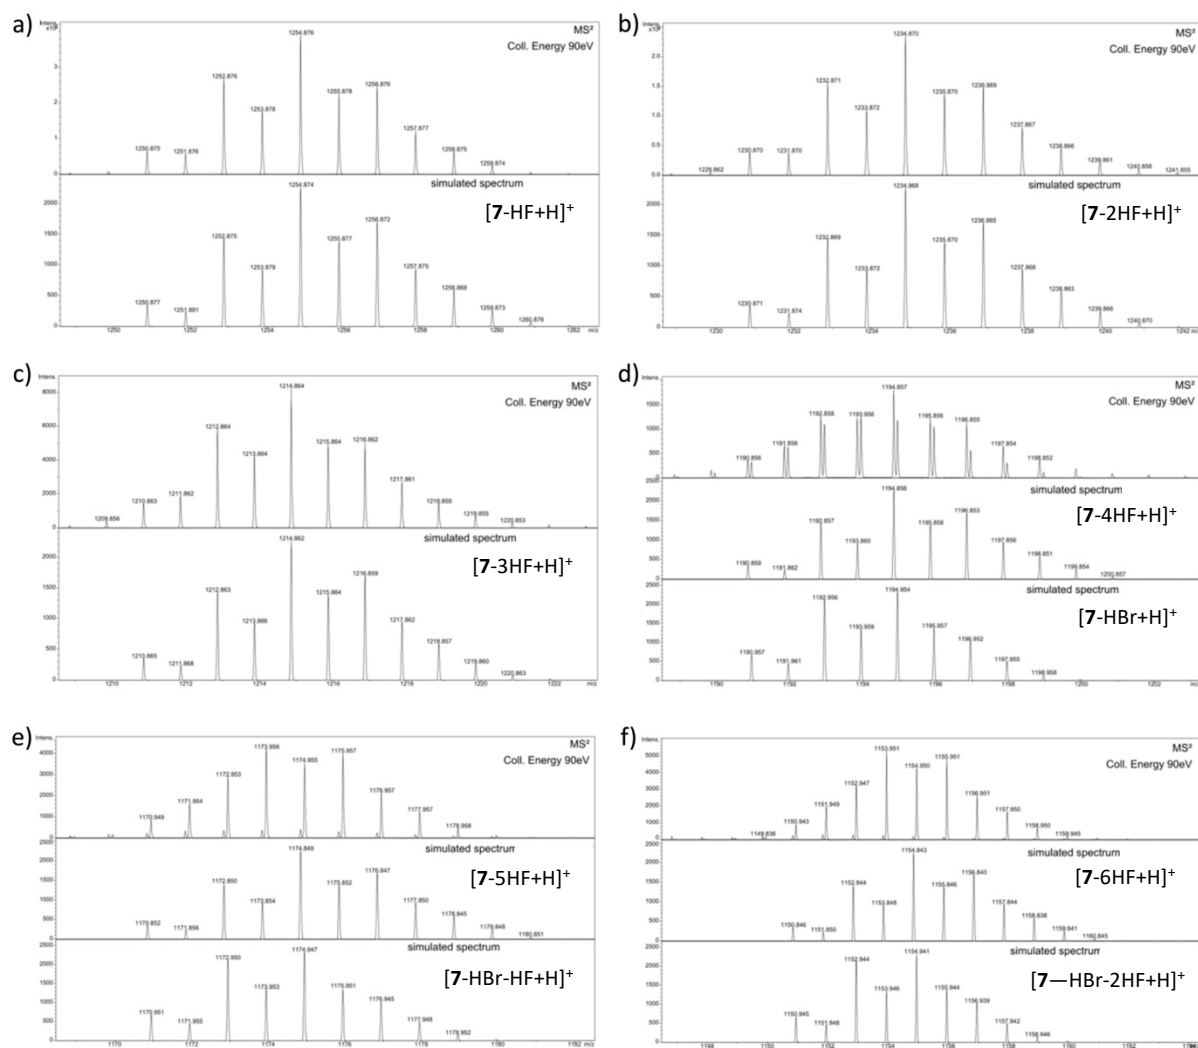

**Figure S69.** HRMS spectrum (top) and simulated spectrum (bottom of: a)  $[7\text{-HF+H}]^+$ ; b)  $[7\text{-2HF+H}]^+$ ; c)  $[7\text{-3HF+H}]^+$ ; d)  $[7\text{-4HF+H}]^+$  (simulation middle) and  $[7\text{-HBr+H}]^+$  (simulation bottom); e)  $[7\text{-5HF+H}]^+$  (simulation middle) and  $[7\text{-HBr-HF+H}]^+$  (simulation bottom); f)  $[7\text{-6HF+H}]^+$  (simulation middle) and  $[7\text{-HBr-2HF+H}]^+$  (simulation bottom).

# FT-ICR experiments with Ref (5,10,15,20-tetrakis(pentafluorophenyl)-porphyrin)

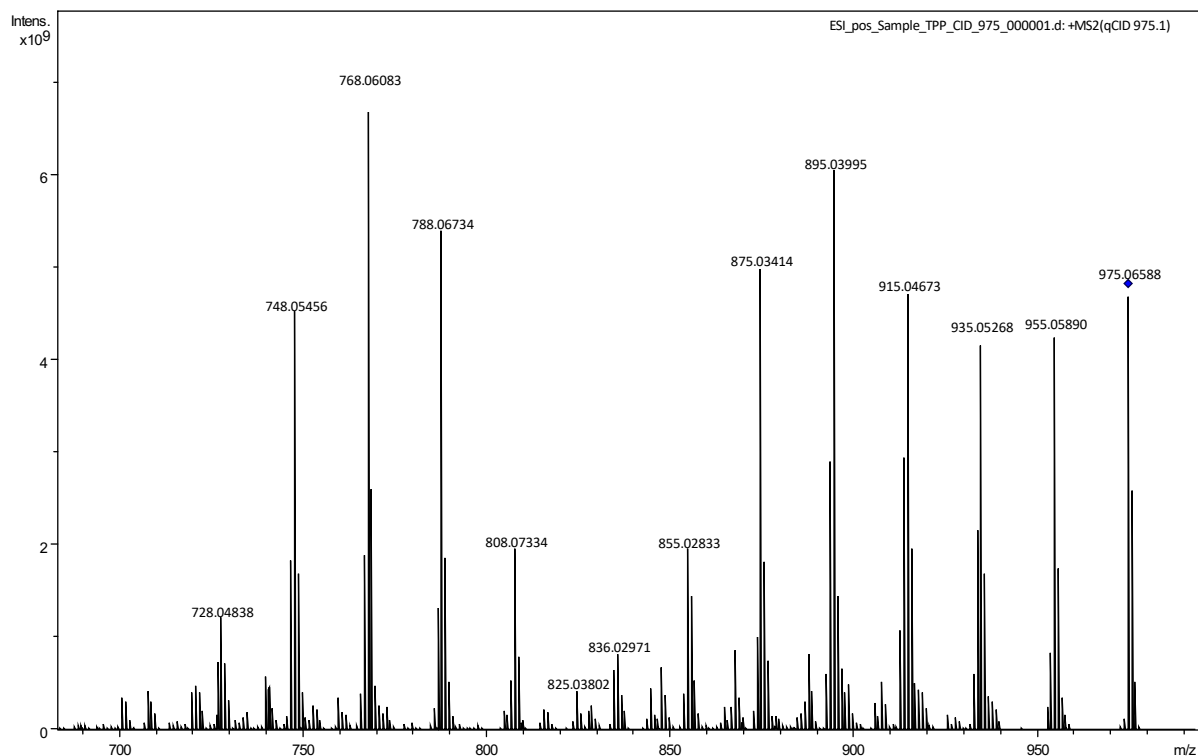

Figure S70. Overview on MS<sup>2</sup> experiments of monomer [Ref+H]<sup>+</sup> with FT-ICR.

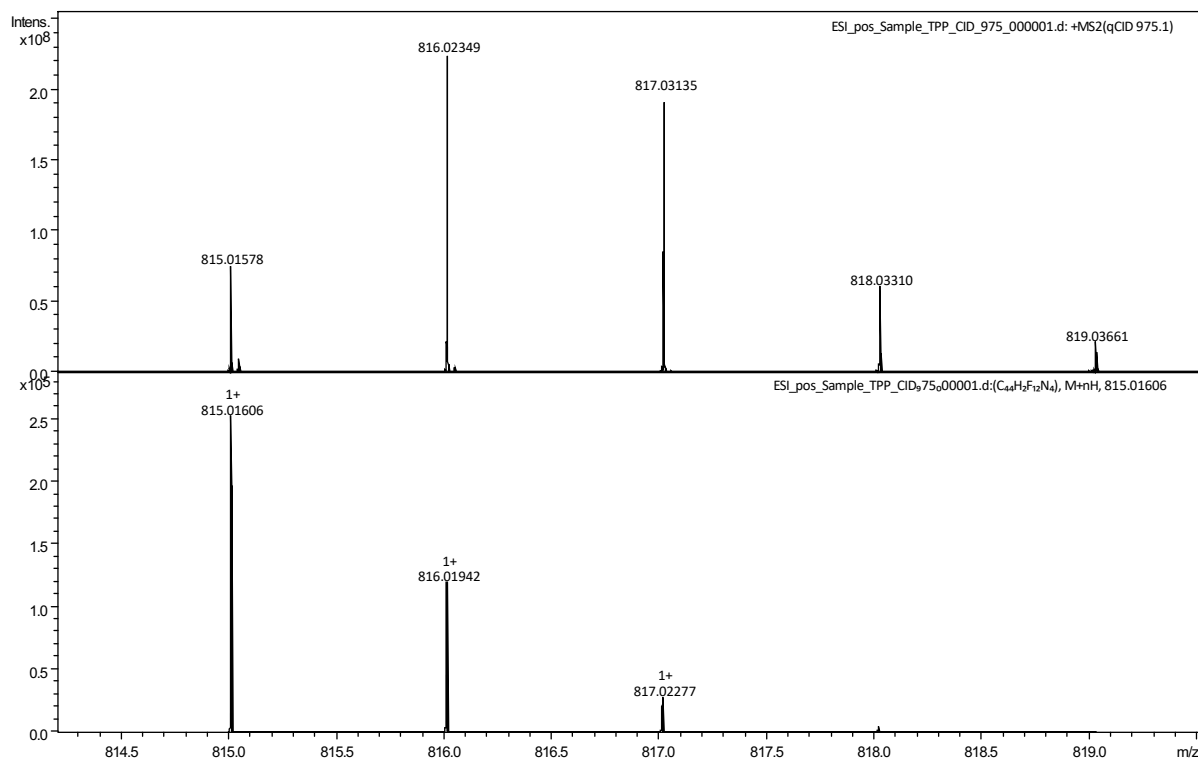

Figure S71. HRMS spectrum (top), and simulated spectrum [Ref+H-8HF]<sup>+</sup> (bottom).

## 2.4 Chapter S4 – Dissociation Experiments of 3, 4, 5, 6, and 6Pd

### QTOF experiments with 3

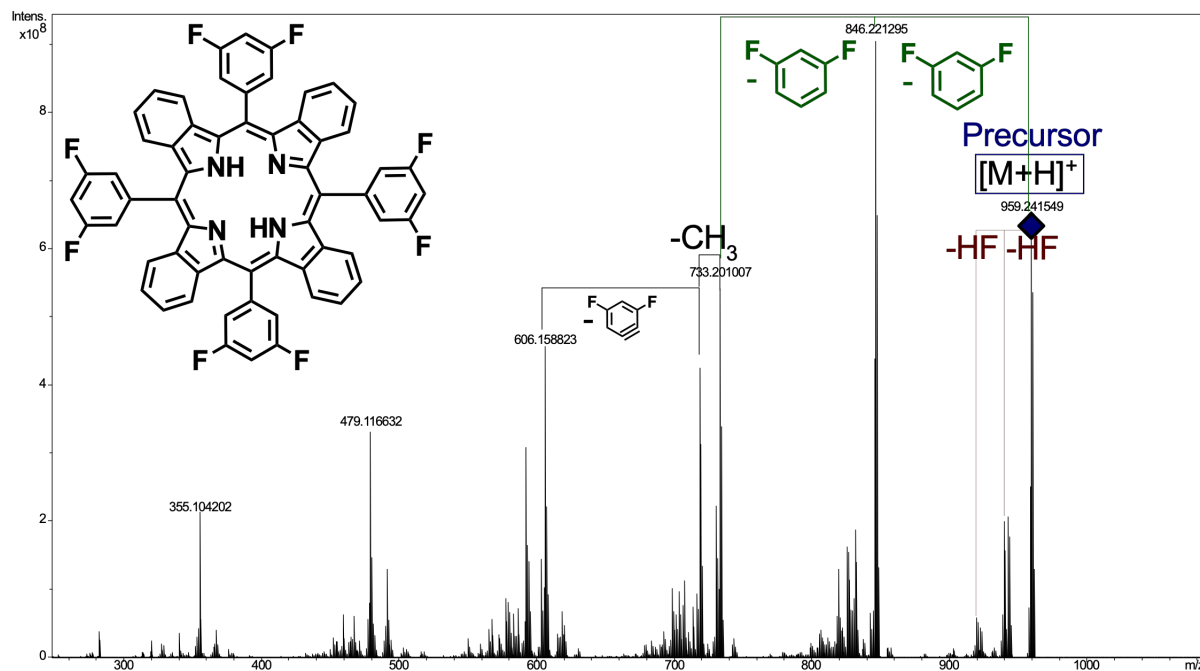

Figure S72. Overview on MS<sup>2</sup> experiments of monomer [3+H]<sup>+</sup> with QTOF.

### FT-ICR experiments with 3

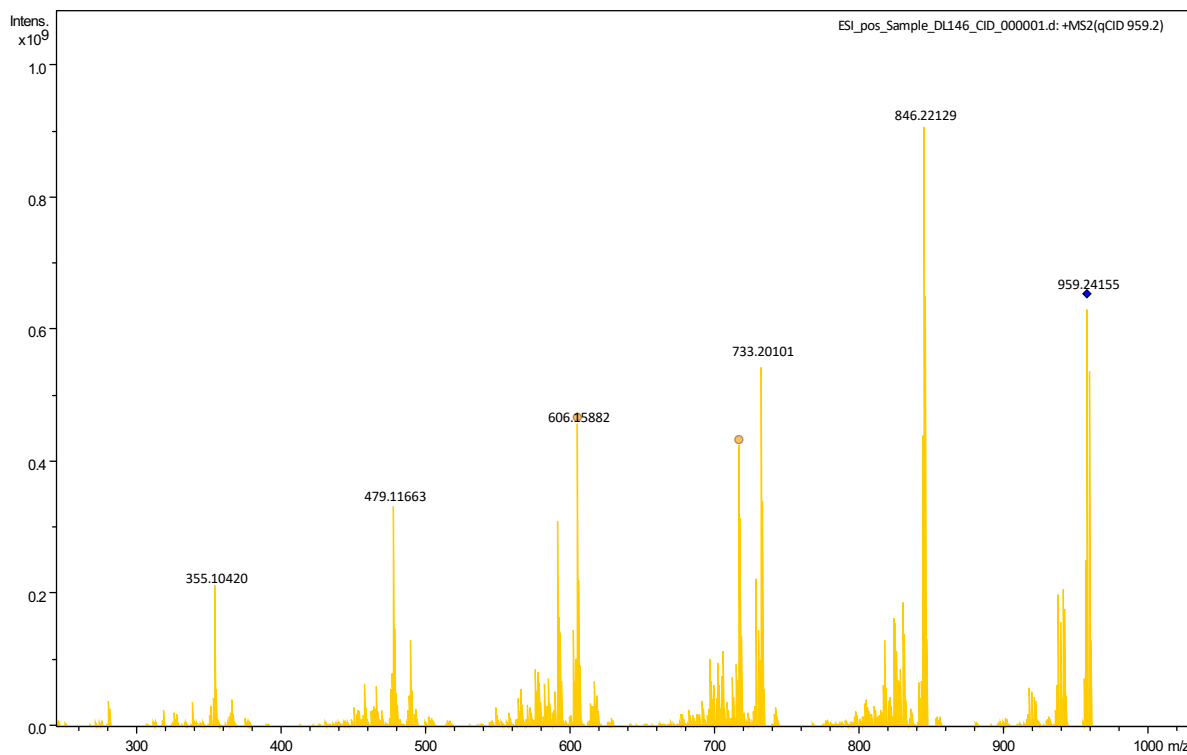

Figure S73. Overview on MS<sup>2</sup> experiments of monomer [3+H]<sup>+</sup> with FT-ICR.

## QTOF experiments with 4

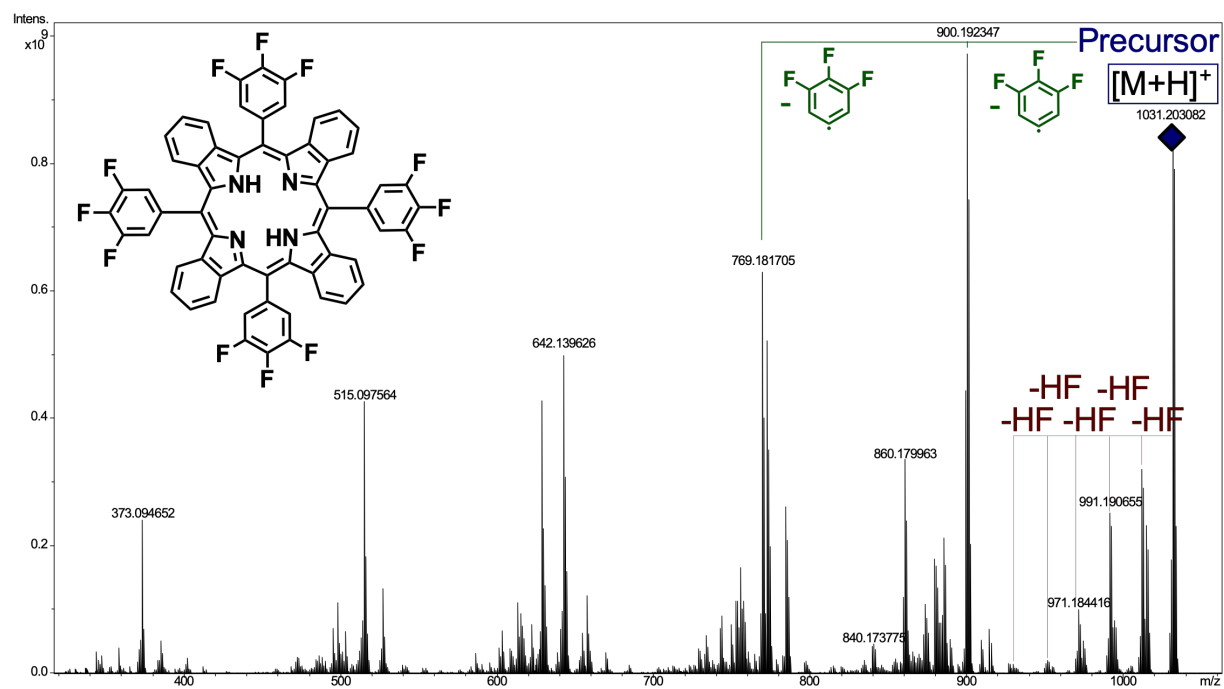

Figure S74. Overview on MS<sup>2</sup> experiments of monomer [4+H]<sup>+</sup> with QTOF.

## FT-ICR experiments with 4

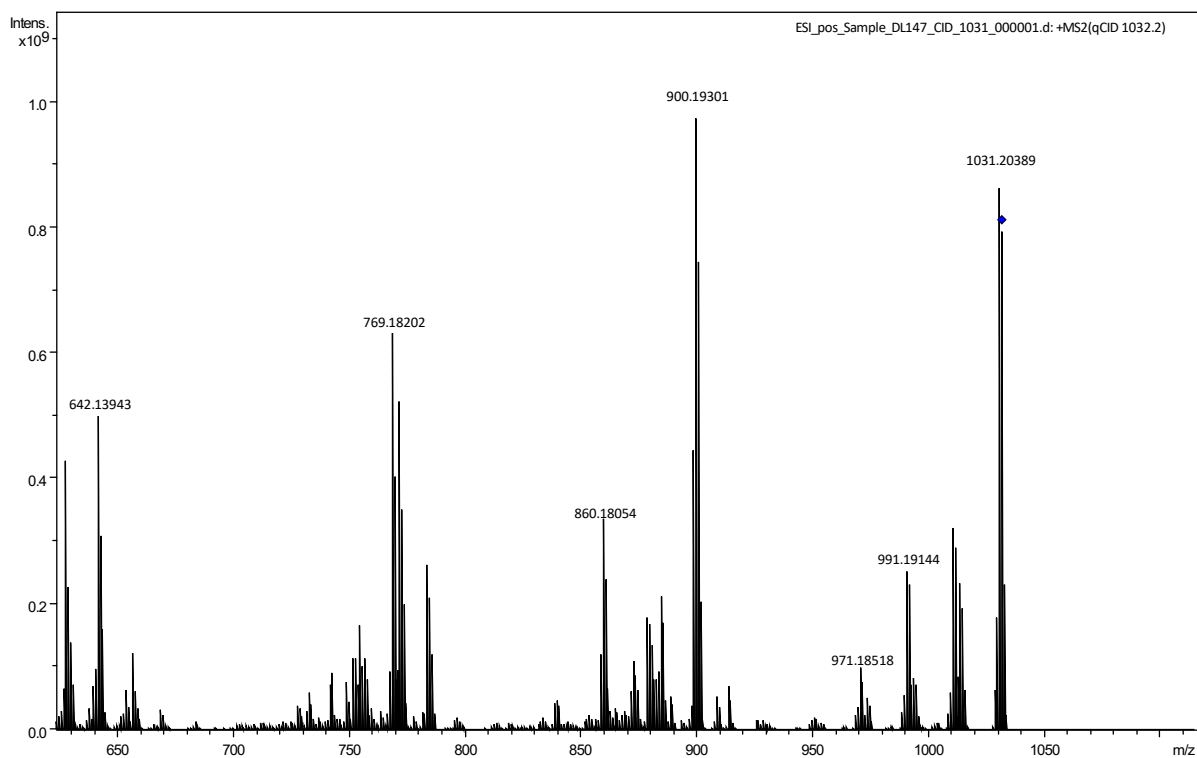

Figure S75. Overview on MS<sup>2</sup> experiments of monomer [4+H]<sup>+</sup> with FT-ICR.

## QTOF experiments with 5

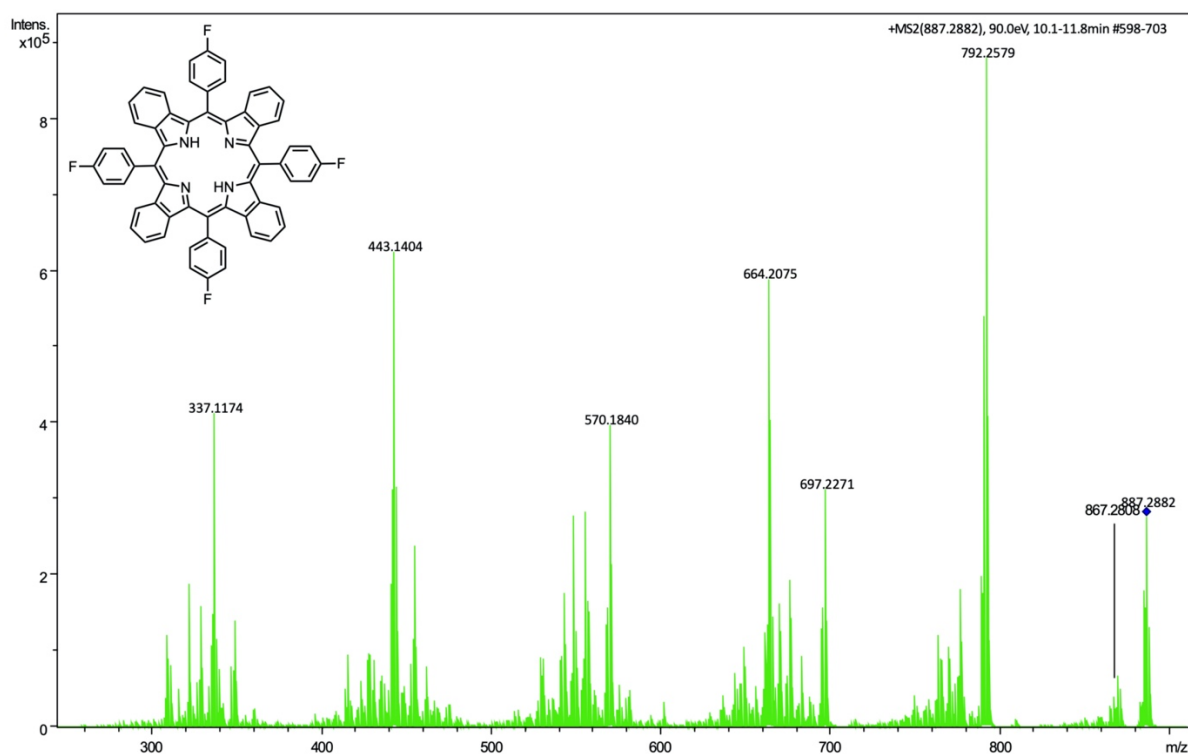

Figure S76. Overview on MS<sup>2</sup> experiments of monomer [5+H]<sup>+</sup> with QTOF.

## QTOF experiments with 6

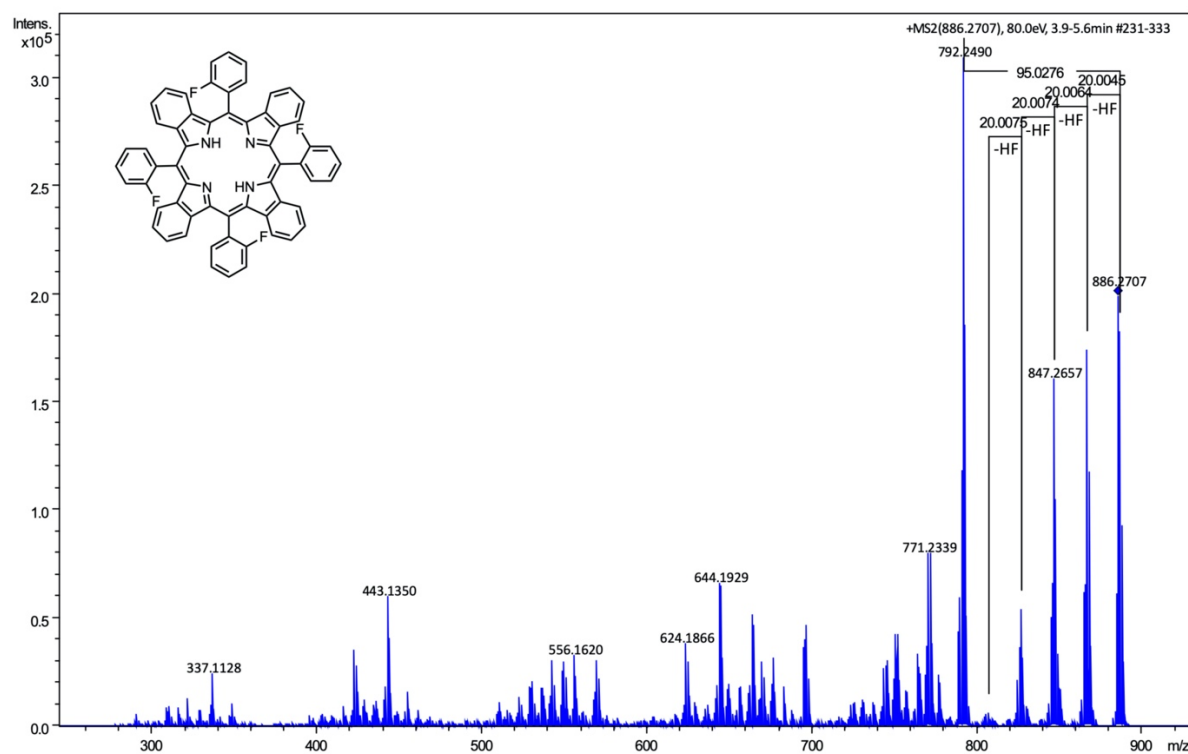

Figure S77. Overview on MS<sup>2</sup> experiments of monomer [6+H]<sup>+</sup> with QTOF.

## QTOF experiments with 6Pd

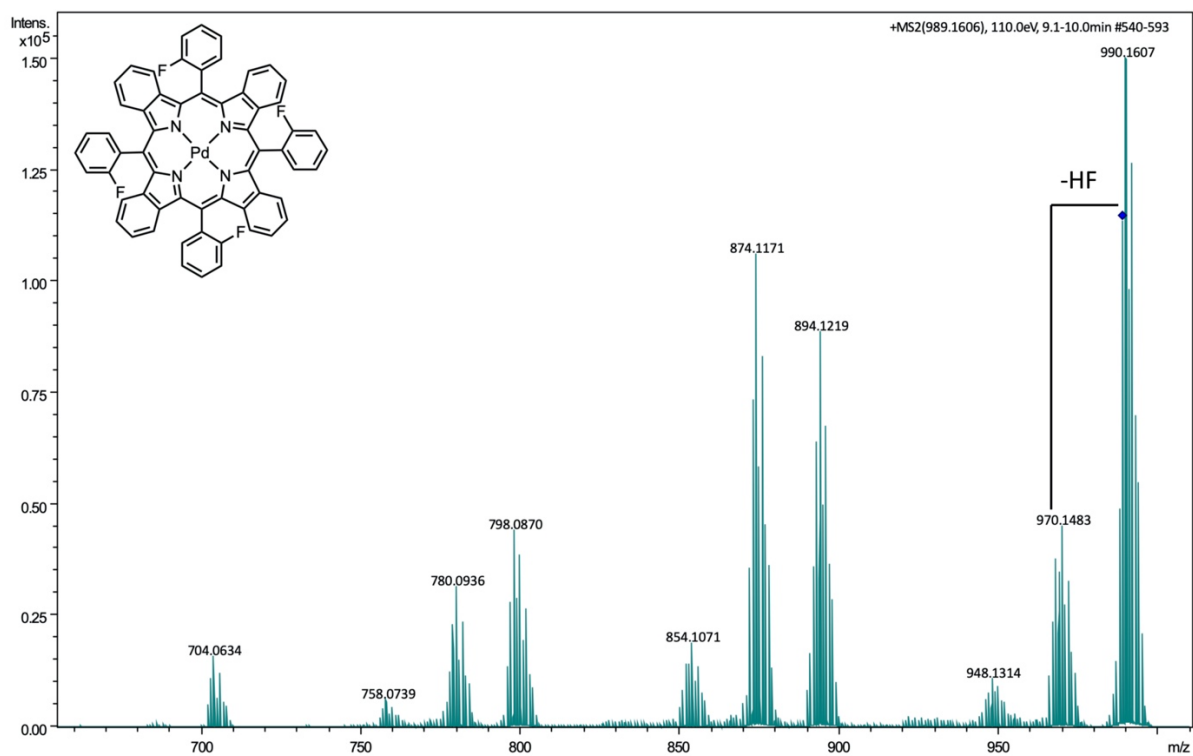

Figure S78. Overview on MS<sup>2</sup> experiments of monomer [6Pd]<sup>++</sup> with QTOF.

### 3. COMPUTATIONAL ANALYSIS

#### 3.1 General information

For comparison of our mass spectra with DFT data we performed geometry optimizations for the detected cations. Starting with the intact benzoporphyrin cation we stepwise eliminated HF under consideration of all possible pathways, following the path of the most stable intermediate.

For the quantum chemical calculations in the manuscript, we employed the range-separated hybrid functional  $\omega$ B97X-D,<sup>[5]</sup> which employs the Grimme D2 correction, in combination with the 6-311G(d,p) Pople basis set, using the Spartan '16 work package.<sup>[6]</sup>

Comparable results were obtained from the exchange-correlation functional of Perdew, Burke, and Ernzerhof (PBE)<sup>[7]</sup> in combination with the def2-TZVP basis set of Weigend and Ahlrichs<sup>[8]</sup> using the RI-J<sup>[9]</sup> and MARI-J<sup>[10]</sup> approximation. Additionally the Grimme D3 dispersion correction<sup>[11]</sup> was employed. All quantum chemical calculations were performed using the Turbomole suite.<sup>[12]</sup>

The following numbering for cyclized bonds is used in the tables below.

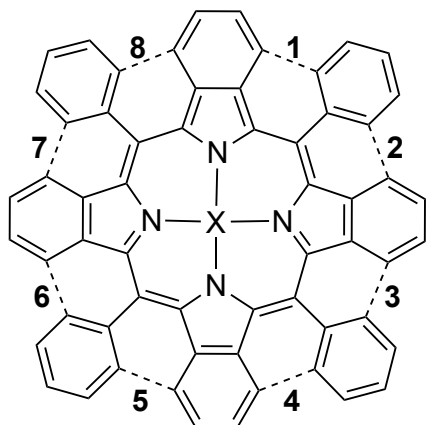



### 3.2 Energy data on cyclization of [1+H]<sup>+</sup> and [1Co]<sup>+</sup>

**Table S4.** Energy values of geometry-optimized cyclized intermediates, starting from [1Co]<sup>+</sup>, calculated at the  $\omega$ B97X-D/6-311G(d,p) level of theory.

| -xHF | Closed bonds | $E_{\text{total}}$ [eV] | $E_{\text{total}} + E_{\text{HF}}$ [eV] | $E_{\text{rel to 0}}$ [eV] | $\Delta E_{\text{step}}$ [eV] |
|------|--------------|-------------------------|-----------------------------------------|----------------------------|-------------------------------|
| 0    | 0            | -160386.1830            | -160386.1830                            | 0                          | 0                             |
| 1    | 1            | -157653.6575            | -160386.8789                            | -0.695877132               | -0.695877132                  |
| 2    | 12           | -154921.2401            | -160387.6829                            | -1.499892368               | -0.804015236                  |
| 3    | 125          | -152188.7548            | -160388.4191                            | -2.236069584               | -0.736177216                  |
| 4    | 1256         | -149456.5757            | -160389.4614                            | -3.278375049               | -1.042305466                  |
| 5    | 12563        | -146723.5143            | -160389.6214                            | -3.43835087                | -0.159975821                  |
| 6    | 125634       | -143990.8248            | -160390.1533                            | -3.970279317               | -0.531928447                  |
| 7    | 1256347      | -141257.3714            | -160389.9213                            | -3.738302132               | 0.231977185                   |
| 8    | 12563478     | -138524.8562            | -160390.6276                            | -4.44460123                | -0.706299098                  |

**Table S5.** Energy values of geometry-optimized cyclized intermediates, starting from [1+H]<sup>+</sup>, calculated at the  $\omega$ B97X-D/6-311G(d,p) level of theory.

| -xHF | Closed bonds | $E_{\text{total}}$ [eV] | $E_{\text{total}} + E_{\text{HF}}$ [eV] | $E_{\text{rel to 0}}$ [eV] | $\Delta E_{\text{step}}$ [eV] |
|------|--------------|-------------------------|-----------------------------------------|----------------------------|-------------------------------|
| 0    | 0            | -122806.0471            | -122806.0471                            | 0                          | 0                             |
| 1    | 1            | -120073.4300            | -122806.6514                            | -0.604256348               | -0.604256348                  |
| 2    | 12           | -117341.1085            | -122807.5513                            | -1.504218981               | -0.899962632                  |
| 3    | 125          | -114608.5916            | -122808.2559                            | -2.208776549               | -0.704557569                  |
| 4    | 1256         | -111876.2704            | -122809.1561                            | -3.109011296               | -0.900234746                  |
| 5    | 12563        | -109143.2965            | -122809.4036                            | -3.356471767               | -0.247460472                  |
| 6    | 125634       | -106410.3367            | -122809.6652                            | -3.618082167               | -0.2616104                    |
| 7    | 1256347      | -103677.3445            | -122809.8945                            | -3.847392635               | -0.229310468                  |
| 8    | 12563478     | -100944.5571            | -122810.3285                            | -4.28133283                | -0.433940196                  |

### 3.3 Energy data on cyclization of [1+H]<sup>+</sup> and [1Cu]<sup>+</sup>

**Table S6.** Energy values of geometry-optimized cyclized intermediates, starting from [1Cu]<sup>+</sup>, calculated at the PBE/def2-TZVP D3 level of theory.

| -xHF | Closed bonds | $E_{\text{total}}$ [eV] | $E_{\text{total}} + E_{\text{HF}}$ [eV] | $E_{\text{rel to 0}}$ [eV] | $\Delta E_{\text{step}}$ [eV] |
|------|--------------|-------------------------|-----------------------------------------|----------------------------|-------------------------------|
| 0    | 0            | -167319.969             | -167319.969                             | 0                          | 0                             |
| 1    | 1            | -164588.899             | -167320.688                             | -0.7189835                 | -0.7189835                    |
| 2    | 12           | -161858.145             | -167321.723                             | -1.7540195                 | -1.035036                     |
| 3    | 125          | -159126.992             | -167322.359                             | -2.3902931                 | -0.6362736                    |
| 4    | 1256         | -156396.305             | -167323.461                             | -3.4920937                 | -1.1018006                    |
| 5    | 12563        | -153664.867             | -167323.812                             | -3.8431134                 | -0.3510197                    |
| 6    | 125634       | -150933.584             | -167324.317                             | -4.3483955                 | -0.5052821                    |
| 7    | 1256347      | -148202.096             | -167324.618                             | -4.6491816                 | -0.3007861                    |
| 8    | 12563478     | -145470.901             | -167325.212                             | -5.2433116                 | -0.59413                      |

**Table S7.** Energy values of geometry-optimized cyclized intermediates, starting from [1+H]<sup>+</sup>, calculated at the PBE/def2-TZVP D3 level of theory.

| -xHF | Closed bonds | $E_{\text{total}}$ [eV] | $E_{\text{total}} + E_{\text{HF}}$ [eV] | $E_{\text{rel to 0}}$ [eV] | $\Delta E_{\text{step}}$ [eV] |
|------|--------------|-------------------------|-----------------------------------------|----------------------------|-------------------------------|
| 0    | 0            | -122732.806             | -122732.806                             | 0                          | 0                             |
| 1    | 1            | -120001.708             | -122733.497                             | -0.6903124                 | -0.6903124                    |
| 2    | 12           | -117270.864             | -122734.441                             | -1.635041                  | -0.9447286                    |
| 3    | 126          | -114539.873             | -122735.240                             | -2.4331287                 | -0.7980877                    |
| 4    | 1265         | -111809.051             | -122736.207                             | -3.4003781                 | -0.9672494                    |
| 5    | 12653        | -109077.635             | -122736.579                             | -3.7725678                 | -0.3721897                    |
| 6    | 126534       | -106346.205             | -122736.939                             | -4.132385                  | -0.3598172                    |
| 7    | 1265347      | -103614.804             | -122737.326                             | -4.5200164                 | -0.3876314                    |
| 8    | 12653478     | -100883.523             | -122737.834                             | -5.0276159                 | -0.5075995                    |

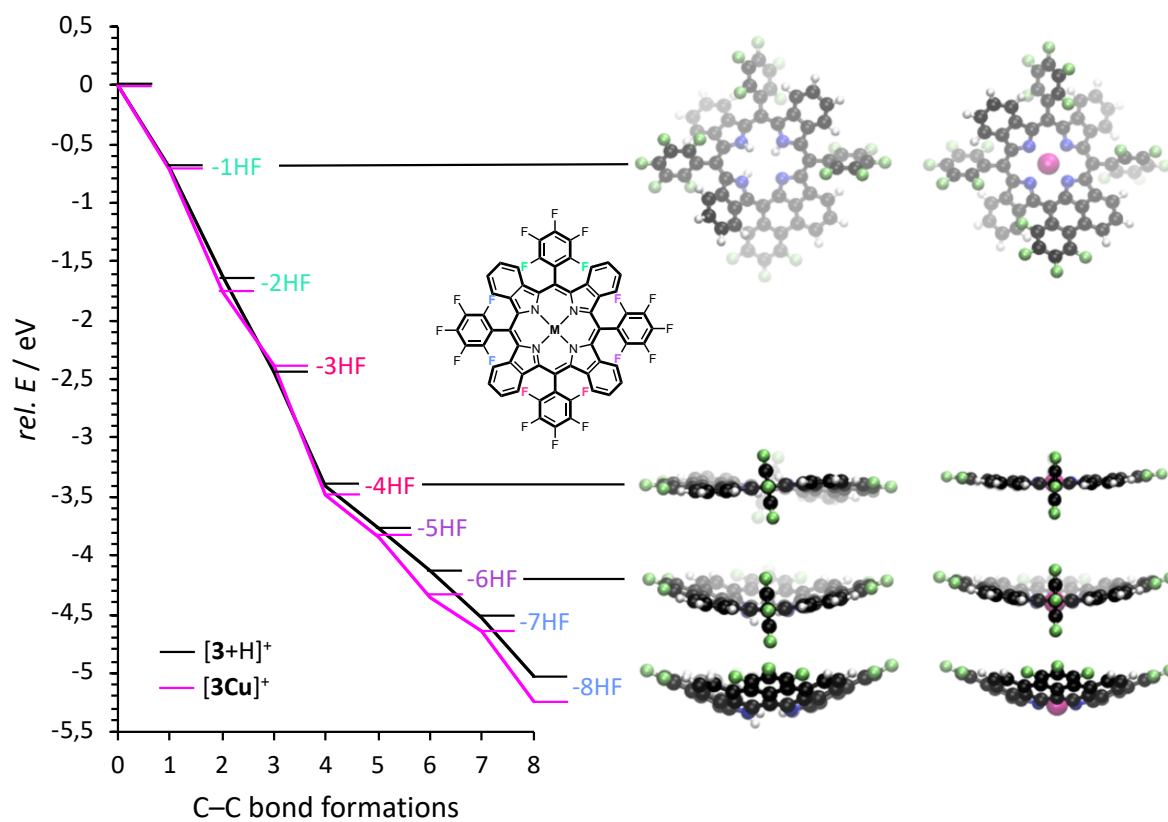

**Figure S79.** Summary of the computational analysis of the stepwise C–C bond formation through HF elimination of  $[1+H]^+$  and  $[1Cu]^{2+}$  at the DFT PBE/def2-TZVP D3 level of theory.

### 3.4 Normal-coordinate structural decomposition analysis

For Normal-coordinate Structural Decomposition (NSD) analyses, we used the NSD engine program as provided by J. A. Shelnutt,<sup>[13]</sup> which was kindly handed to us by the Senge group from Dublin. The theory and development of this method have been described by Shelnutt and co-workers.<sup>[14-16]</sup>

NSD employs the decomposition of the conformation of the porphyrin macrocycle by a basis set composed of its various normal modes of vibration. The result affords the quantitative separation of the contributing distortions to the macrocycle conformation.

The summaries of the NSD are given in Å:

The normal-modes for the out-of-plane distortions of the minimum basis consist of the lowest energy vibration from each symmetry and comprise the saddle ( $B_{2u}$ ), ruffle ( $B_{1u}$ ), domed ( $A_{2u}$ ), propellered ( $A_{1u}$ ) and the degenerate wave modes [ $E_g(x)$  and  $E_g(y)$ ]. The in-plane modes that compose the minimum basis are the *meso*-stretching ( $B_{2g}$ ), N-stretching ( $B_{1g}$ ), pyrrole-translation [ $E_u(x)$  and  $E_u(y)$ ], breathing ( $A_{1g}$ ) and pyrrole-rotation ( $A_{2g}$ ).<sup>[17,18]</sup>

[1+H]<sup>+</sup> -0HF:

NSD result generated from file *F5P-TBP+H\_cation\_wB97X-D-6-311Gss.pdb*

| basis | Dip    | dip    | B2g     | B1g    | Eu(x)   | Eu(y)   | A1g     | A2g     |
|-------|--------|--------|---------|--------|---------|---------|---------|---------|
| min.  | 0.4015 | 0.0950 | -0.0019 | 0.0624 | -0.0015 | 0.0347  | -0.3951 | -0.0005 |
| ext.  | 0.4836 | 0.0771 | -0.0019 | 0.0633 | -0.0015 | 0.0341  | -0.3959 | -0.0004 |
|       |        |        | 0.0004  | 0.0454 | 0.0005  | -0.0469 | -0.2613 | 0.0104  |
| comp. | 0.6584 | 0.0000 | 0.0020  | 0.0789 | 0.0025  | 0.1677  | 0.6317  | 0.0104  |

  

| basis | Doop   | doop   | B2u     | B1u     | A2u     | Eg(x)   | Eg(y)   | A1u     |
|-------|--------|--------|---------|---------|---------|---------|---------|---------|
| min.  | 3.2577 | 0.0468 | 3.2542  | 0.0375  | 0.0321  | 0.0013  | -0.1427 | -0.0003 |
| ext.  | 3.2712 | 0.0041 | 3.2489  | 0.0375  | 0.0315  | 0.0013  | -0.1470 | -0.0003 |
|       |        |        | -0.2736 | -0.0019 | -0.0145 | -0.0013 | -0.1148 | -0.0003 |
| comp. | 3.2713 | 0.0000 | 3.2657  | 0.0375  | 0.0364  | 0.0020  | 0.1843  | 0.0004  |

[1+H]<sup>+</sup> -1HF:

NSD result generated from file *-1HFd\_F5P-TBP+H\_cation\_wB97X-D-6311Gss.pdb*

| basis | Dip    | dip    | B2g     | B1g    | Eu(x)   | Eu(y)   | A1g     | A2g     |
|-------|--------|--------|---------|--------|---------|---------|---------|---------|
| min.  | 0.4477 | 0.0997 | -0.1431 | 0.0795 | -0.2131 | 0.1208  | -0.3370 | -0.0091 |
| ext.  | 0.5503 | 0.0773 | -0.1439 | 0.0804 | -0.2129 | 0.1202  | -0.3375 | -0.0070 |
|       |        |        | -0.1207 | 0.0471 | 0.0176  | -0.0550 | -0.1641 | 0.2352  |
| comp. | 0.7321 | 0.0001 | 0.1891  | 0.1464 | 0.2811  | 0.2432  | 0.5327  | 0.2382  |

  

| basis | Doop   | doop   | B2u     | B1u    | A2u     | Eg(x)  | Eg(y)   | A1u     |
|-------|--------|--------|---------|--------|---------|--------|---------|---------|
| min.  | 2.8923 | 0.0594 | 2.6396  | 1.0090 | -0.2088 | 0.3309 | -0.4763 | 0.0066  |
| ext.  | 2.9135 | 0.0183 | 2.6334  | 1.0090 | -0.2046 | 0.3341 | -0.4776 | 0.0066  |
|       |        |        | -0.3220 | 0.0320 | 0.0979  | 0.0860 | -0.0353 | -0.0127 |
| comp. | 2.9158 | 0.0000 | 2.6593  | 1.0097 | 0.2308  | 0.3505 | 0.4839  | 0.0144  |

[1+H]<sup>+</sup> -2HF:

NSD result generated from file -2HFa\_F5P-TBP+H\_cation\_wB97X-D-6311Gss.pdb

| basis | Dip    | dip    | B2g     | B1g    | Eu(x)   | Eu(y)   | A1g     | A2g    |
|-------|--------|--------|---------|--------|---------|---------|---------|--------|
| min.  | 0.2982 | 0.0633 | -0.2478 | 0.0823 | -0.0871 | 0.1105  | -0.0290 | 0.0104 |
| ext.  | 0.3568 | 0.0507 | -0.2483 | 0.0830 | -0.0868 | 0.1097  | -0.0295 | 0.0105 |
|       |        |        | -0.0859 | 0.0376 | 0.0251  | -0.0697 | -0.1553 | 0.0040 |
| comp. | 0.4775 | 0.0000 | 0.2671  | 0.0928 | 0.1012  | 0.2245  | 0.2953  | 0.0116 |

  

| basis | Doop   | doop   | B2u     | B1u     | A2u     | Eg(x)   | Eg(y)   | A1u     |
|-------|--------|--------|---------|---------|---------|---------|---------|---------|
| min.  | 2.1353 | 0.0365 | 2.0661  | -0.0034 | 0.0335  | -0.2192 | -0.4893 | -0.0448 |
| ext.  | 2.1483 | 0.0093 | 2.0622  | -0.0034 | 0.0326  | -0.2167 | -0.4929 | -0.0448 |
|       |        |        | -0.2044 | 0.0081  | -0.0203 | 0.0686  | -0.0943 | 0.0134  |
| comp. | 2.1491 | 0.0000 | 2.0763  | 0.0104  | 0.0407  | 0.2314  | 0.5001  | 0.0468  |

[1+H]<sup>+</sup> -3HF:

NSD result generated from file -3HFd\_F5P-TBP+H\_cation\_wB97X-D-6311Gss.pdb

| basis | Dip    | dip    | B2g     | B1g    | Eu(x)   | Eu(y)   | A1g     | A2g     |
|-------|--------|--------|---------|--------|---------|---------|---------|---------|
| min.  | 0.3347 | 0.0742 | -0.3188 | 0.0594 | 0.0659  | -0.0184 | -0.0362 | 0.0288  |
| ext.  | 0.4284 | 0.0539 | -0.3203 | 0.0596 | 0.0658  | -0.0186 | -0.0365 | 0.0278  |
|       |        |        | -0.2191 | 0.0099 | -0.0113 | -0.0231 | -0.1048 | -0.1084 |
| comp. | 0.5693 | 0.0000 | 0.3904  | 0.1164 | 0.1095  | 0.2563  | 0.2586  | 0.1164  |

  

| basis | Doop   | doop   | B2u     | B1u     | A2u     | Eg(x)  | Eg(y)   | A1u     |
|-------|--------|--------|---------|---------|---------|--------|---------|---------|
| min.  | 1.7839 | 0.0507 | 1.3513  | -0.8205 | 0.2666  | 0.2183 | -0.7510 | -0.0146 |
| ext.  | 1.8092 | 0.0164 | 1.3466  | -0.8205 | 0.2608  | 0.2185 | -0.7549 | -0.0146 |
|       |        |        | -0.2471 | -0.0316 | -0.1340 | 0.0045 | -0.1045 | 0.0026  |
| comp. | 1.8123 | 0.0000 | 1.3740  | 0.8214  | 0.2997  | 0.2298 | 0.7608  | 0.0149  |

[1+H]<sup>+</sup> -4HF:

NSD result generated from file -4HFa\_F5P-TBP+H\_cation\_wB97X-D-6311Gss.pdb

| basis | Dip    | dip    | B2g     | B1g    | Eu(x)   | Eu(y)  | A1g     | A2g     |
|-------|--------|--------|---------|--------|---------|--------|---------|---------|
| min.  | 0.4374 | 0.0493 | -0.3868 | 0.0397 | -0.0003 | 0.0448 | 0.1949  | 0.0093  |
| ext.  | 0.4855 | 0.0316 | -0.3880 | 0.0404 | -0.0004 | 0.0450 | 0.1946  | 0.0092  |
|       |        |        | -0.1817 | 0.0363 | -0.0150 | 0.0123 | -0.0982 | -0.0092 |
| comp. | 0.5180 | 0.0000 | 0.4365  | 0.0590 | 0.0238  | 0.0993 | 0.2525  | 0.0136  |

  

| basis | Doop   | doop   | B2u     | B1u     | A2u    | Eg(x)  | Eg(y)   | A1u     |
|-------|--------|--------|---------|---------|--------|--------|---------|---------|
| min.  | 0.6834 | 0.0299 | 0.6337  | -0.0687 | 0.0300 | 0.1374 | -0.1868 | -0.0776 |
| ext.  | 0.7143 | 0.0031 | 0.6310  | -0.0687 | 0.0300 | 0.1404 | -0.1915 | -0.0776 |
|       |        |        | -0.1439 | 0.0058  | 0.0005 | 0.0793 | -0.1265 | 0.0124  |
| comp. | 0.7145 | 0.0000 | 0.6499  | 0.0689  | 0.0300 | 0.1592 | 0.2258  | 0.0786  |

[1+H]<sup>+</sup> -5HF:

NSD result generated from file -5HFb\_F5P-TBP+H\_cation\_wB97X-D-6311Gss.pdb

| basis | Dip    | dip    | B2g     | B1g     | Eu(x)   | Eu(y)  | A1g     | A2g     |
|-------|--------|--------|---------|---------|---------|--------|---------|---------|
| min.  | 0.5879 | 0.0570 | -0.5134 | -0.2203 | -0.1667 | 0.0189 | 0.0611  | -0.0414 |
| ext.  | 0.6234 | 0.0414 | -0.5142 | -0.2206 | -0.1676 | 0.0194 | 0.0608  | -0.0410 |
|       |        |        | -0.1294 | -0.0162 | -0.0849 | 0.0435 | -0.1243 | 0.0387  |
| comp. | 0.6792 | 0.0000 | 0.5339  | 0.2295  | 0.1908  | 0.1926 | 0.2154  | 0.0604  |

  

| basis | Doop   | doop   | B2u     | B1u    | A2u     | Eg(x)  | Eg(y)   | A1u     |
|-------|--------|--------|---------|--------|---------|--------|---------|---------|
| min.  | 1.0106 | 0.0555 | 0.5945  | 0.5666 | 0.3760  | 0.0205 | -0.4460 | -0.0777 |
| ext.  | 1.0636 | 0.0160 | 0.5906  | 0.5666 | 0.3724  | 0.0247 | -0.4540 | -0.0777 |
|       |        |        | -0.2037 | 0.0495 | -0.0841 | 0.1126 | -0.2146 | 0.0144  |
| comp. | 1.0681 | 0.0000 | 0.6285  | 0.5692 | 0.3857  | 0.1384 | 0.4978  | 0.0790  |

[1+H]<sup>+</sup> -6HF:

NSD result generated from file -6HFa\_F5P-TBP+H\_cation\_wB97X-D-6311Gss.pdb

| basis | Dip    | dip    | B2g     | B1g    | Eu(x)   | Eu(y)   | A1g     | A2g    |
|-------|--------|--------|---------|--------|---------|---------|---------|--------|
| min.  | 0.2907 | 0.0568 | -0.2314 | 0.0240 | -0.1502 | -0.0873 | 0.0129  | 0.0048 |
| ext.  | 0.3366 | 0.0465 | -0.2320 | 0.0245 | -0.1497 | -0.0865 | 0.0125  | 0.0048 |
|       |        |        | -0.0856 | 0.0304 | 0.0441  | 0.0728  | -0.1153 | 0.0030 |
| comp. | 0.4374 | 0.0000 | 0.2532  | 0.0412 | 0.1715  | 0.1987  | 0.2379  | 0.0080 |

  

| basis | Doop   | doop   | B2u     | B1u     | A2u    | Eg(x)   | Eg(y)   | A1u     |
|-------|--------|--------|---------|---------|--------|---------|---------|---------|
| min.  | 0.9459 | 0.0671 | 0.1205  | 0.2806  | 0.8769 | -0.0781 | -0.1624 | 0.0032  |
| ext.  | 1.0260 | 0.0050 | 0.1191  | 0.2806  | 0.8811 | -0.0866 | -0.1737 | 0.0032  |
|       |        |        | -0.0723 | -0.0051 | 0.0984 | -0.2280 | -0.3022 | -0.0007 |
| comp. | 1.0264 | 0.0000 | 0.1405  | 0.2807  | 0.8826 | 0.2414  | 0.3432  | 0.0032  |

[1+H]<sup>+</sup> -7HF:

NSD result generated from file -7HFa\_F5P-TBP+H\_cation\_wB97X-D-6311Gss.pdb

| basis | Dip    | dip    | B2g     | B1g     | Eu(x)   | Eu(y)  | A1g     | A2g     |
|-------|--------|--------|---------|---------|---------|--------|---------|---------|
| min.  | 0.4070 | 0.0715 | -0.3160 | -0.1567 | -0.0293 | 0.1653 | -0.1044 | -0.0461 |
| ext.  | 0.4606 | 0.0587 | -0.3160 | -0.1570 | -0.0307 | 0.1653 | -0.1049 | -0.0459 |
|       |        |        | 0.0034  | -0.0201 | -0.1204 | 0.0025 | -0.1769 | 0.0181  |
| comp. | 0.5831 | 0.0000 | 0.3201  | 0.1807  | 0.1346  | 0.2296 | 0.3626  | 0.0512  |

  

| basis | Doop   | doop   | B2u     | B1u    | A2u    | Eg(x)  | Eg(y)   | A1u     |
|-------|--------|--------|---------|--------|--------|--------|---------|---------|
| min.  | 1.3964 | 0.0362 | 0.4165  | 0.3917 | 1.2333 | 0.0295 | -0.3132 | -0.0557 |
| ext.  | 1.4131 | 0.0158 | 0.4144  | 0.3917 | 1.2351 | 0.0354 | -0.3104 | -0.0557 |
|       |        |        | -0.1097 | 0.0505 | 0.0430 | 0.1585 | 0.0732  | 0.0081  |
| comp. | 1.4164 | 0.0000 | 0.4308  | 0.3954 | 1.2341 | 0.1793 | 0.3256  | 0.0563  |

[1+H]<sup>+</sup> -8HF:

NSD result generated from file -8HFa\_F5P-TBP+H\_cation\_wB97X-D-6311Gss.pdb

| basis | Dip    | dip    | B2g    | B1g    | Eu(x)  | Eu(y)  | A1g     | A2g     |
|-------|--------|--------|--------|--------|--------|--------|---------|---------|
| min.  | 0.1854 | 0.0733 | 0.0200 | 0.0969 | 0.0024 | 0.0913 | -0.1273 | -0.0051 |
| ext.  | 0.2582 | 0.0647 | 0.0200 | 0.0975 | 0.0024 | 0.0916 | -0.1278 | -0.0051 |
|       |        |        | 0.0013 | 0.0324 | 0.0049 | 0.0291 | -0.1743 | 0.0007  |
| comp. | 0.4559 | 0.0000 | 0.0205 | 0.1057 | 0.0090 | 0.1603 | 0.4128  | 0.0057  |

  

| basis | Doop   | doop   | B2u     | B1u     | A2u    | Eg(x)  | Eg(y)   | A1u     |
|-------|--------|--------|---------|---------|--------|--------|---------|---------|
| min.  | 1.4244 | 0.0313 | 0.1839  | -0.0041 | 1.4081 | 0.0033 | -0.1101 | -0.0040 |
| ext.  | 1.4392 | 0.0079 | 0.1833  | -0.0041 | 1.4159 | 0.0033 | -0.1137 | -0.0040 |
|       |        |        | -0.0321 | 0.0024  | 0.1794 | 0.0013 | -0.0970 | -0.0001 |
| comp. | 1.4399 | 0.0000 | 0.1868  | 0.0047  | 1.4201 | 0.0065 | 0.1468  | 0.0040  |

[1Co]<sup>+</sup> -0HF:

NSD result generated from file Co-F5P-TBP-cation\_wB97X-D-6311Gss.pdb

| basis | Dip    | dip    | B2g     | B1g    | Eu(x)  | Eu(y)   | A1g     | A2g    |
|-------|--------|--------|---------|--------|--------|---------|---------|--------|
| min.  | 0.7929 | 0.0704 | -0.0510 | 0.0648 | 0.0003 | -0.0009 | -0.7884 | 0.0171 |
| ext.  | 0.8314 | 0.0479 | -0.0512 | 0.0652 | 0.0003 | -0.0009 | -0.7889 | 0.0189 |
|       |        |        | -0.0295 | 0.0238 | 0.0005 | 0.0001  | -0.1558 | 0.1917 |
| comp. | 0.8697 | 0.0001 | 0.0697  | 0.0700 | 0.0013 | 0.0014  | 0.8416  | 0.1958 |

  

| basis | Doop   | doop   | B2u     | B1u     | A2u     | Eg(x)   | Eg(y)   | A1u    |
|-------|--------|--------|---------|---------|---------|---------|---------|--------|
| min.  | 3.4485 | 0.0177 | 3.3426  | 0.8432  | 0.0216  | -0.0007 | -0.0005 | 0.0872 |
| ext.  | 3.4499 | 0.0055 | 3.3408  | 0.8432  | 0.0204  | -0.0007 | -0.0005 | 0.0872 |
|       |        |        | -0.0935 | -0.0144 | -0.0287 | 0.0011  | -0.0001 | 0.0036 |
| comp. | 3.4500 | 0.0000 | 3.3439  | 0.8438  | 0.0359  | 0.0014  | 0.0011  | 0.0873 |

**[1Co]<sup>2+</sup> -1HF:**

NSD result generated from file -1HF\_Co-F5P-TBP-cation\_wB97X-D-6311Gss.pdb

| basis | Dip    | dip    | B2g     | B1g    | Eu(x)   | Eu(y)   | A1g     | A2g     |
|-------|--------|--------|---------|--------|---------|---------|---------|---------|
| min.  | 0.7272 | 0.0753 | -0.0368 | 0.0605 | -0.0984 | -0.1983 | -0.6890 | -0.0113 |
| ext.  | 0.8064 | 0.0370 | -0.0361 | 0.0611 | -0.0984 | -0.1974 | -0.6888 | -0.0084 |
|       |        |        | 0.1109  | 0.0336 | 0.0005  | 0.0837  | 0.0554  | 0.3130  |
| comp. | 0.8380 | 0.0001 | 0.1256  | 0.0933 | 0.1275  | 0.2294  | 0.7144  | 0.3141  |
| basis | Doop   | doop   | B2u     | B1u    | A2u     | Eg(x)   | Eg(y)   | A1u     |
| min.  | 2.9760 | 0.0395 | 2.4336  | 1.6733 | 0.1861  | -0.2490 | -0.1713 | 0.0923  |
| ext.  | 2.9861 | 0.0164 | 2.4304  | 1.6732 | 0.1801  | -0.2448 | -0.1727 | 0.0923  |
|       |        |        | -0.1632 | 0.0187 | -0.1387 | 0.1104  | -0.0391 | 0.0137  |
| comp. | 2.9878 | 0.0000 | 2.4391  | 1.6743 | 0.2325  | 0.2796  | 0.1830  | 0.0933  |

**[1Co]<sup>2+</sup> -2HF:**

NSD result generated from file -2HFa\_Co-F5P-TBP-cation\_wB97X-D-6311Gss.pdb

| basis | Dip    | dip    | B2g     | B1g     | Eu(x)   | Eu(y)   | A1g     | A2g     |
|-------|--------|--------|---------|---------|---------|---------|---------|---------|
| min.  | 0.4123 | 0.0383 | 0.1184  | -0.0511 | -0.0278 | -0.0727 | -0.3836 | 0.0095  |
| ext.  | 0.4389 | 0.0279 | 0.1191  | -0.0513 | -0.0276 | -0.0723 | -0.3839 | 0.0099  |
|       |        |        | 0.1106  | -0.0075 | 0.0170  | 0.0403  | -0.0833 | 0.0396  |
| comp. | 0.4629 | 0.0000 | 0.1738  | 0.0524  | 0.0675  | 0.1068  | 0.4028  | 0.0558  |
| basis | Doop   | doop   | B2u     | B1u     | A2u     | Eg(x)   | Eg(y)   | A1u     |
| min.  | 2.2666 | 0.0280 | 2.1886  | 0.4010  | -0.0350 | -0.2866 | 0.3204  | -0.0300 |
| ext.  | 2.2712 | 0.0109 | 2.1884  | 0.4010  | -0.0340 | -0.2833 | 0.3162  | -0.0300 |
|       |        |        | -0.0111 | -0.0076 | 0.0234  | 0.0871  | -0.1103 | -0.0167 |
| comp. | 2.2721 | 0.0000 | 2.1886  | 0.4013  | 0.0421  | 0.3026  | 0.3421  | 0.0343  |

**[1Co]<sup>2+</sup> -3HF:**

NSD result generated from file -3HFd\_Co-F5P-TBP-cation\_wB97X-D-6311Gss.pdb

| basis | Dip    | dip    | B2g     | B1g     | Eu(x)   | Eu(y)   | A1g     | A2g     |
|-------|--------|--------|---------|---------|---------|---------|---------|---------|
| min.  | 0.3728 | 0.0483 | 0.0763  | -0.0036 | 0.0679  | 0.0635  | -0.3520 | -0.0238 |
| ext.  | 0.4423 | 0.0278 | 0.0777  | -0.0034 | 0.0681  | 0.0633  | -0.3518 | -0.0229 |
|       |        |        | 0.2099  | 0.0118  | 0.0181  | -0.0173 | 0.0459  | 0.0988  |
| comp. | 0.4685 | 0.0000 | 0.2275  | 0.0350  | 0.1255  | 0.1036  | 0.3584  | 0.1076  |
| basis | Doop   | doop   | B2u     | B1u     | A2u     | Eg(x)   | Eg(y)   | A1u     |
| min.  | 1.8199 | 0.0357 | 1.1878  | 1.2559  | 0.1528  | 0.1591  | 0.5134  | 0.1081  |
| ext.  | 1.8355 | 0.0134 | 1.1858  | 1.2559  | 0.1468  | 0.1542  | 0.5099  | 0.1081  |
|       |        |        | -0.1069 | 0.0246  | -0.1375 | -0.1323 | -0.0932 | 0.0108  |
| comp. | 1.8375 | 0.0000 | 1.1926  | 1.2567  | 0.2057  | 0.2159  | 0.5235  | 0.1086  |

**[1Co]<sup>2+</sup> -4HF:**

NSD result generated from file -4HFa\_Co-F5P-TBP-cation\_wB97X-D-6311Gss.pdb

| basis | Dip    | dip    | B2g     | B1g     | Eu(x)   | Eu(y)   | A1g     | A2g     |
|-------|--------|--------|---------|---------|---------|---------|---------|---------|
| min.  | 0.1345 | 0.0370 | 0.1142  | -0.0137 | -0.0002 | 0.0001  | -0.0696 | 0.0055  |
| ext.  | 0.2319 | 0.0205 | 0.1154  | -0.0136 | -0.0002 | 0.0001  | -0.0697 | 0.0053  |
|       |        |        | 0.1833  | 0.0041  | -0.0000 | 0.0002  | -0.0393 | -0.0235 |
| comp. | 0.2577 | 0.0000 | 0.2323  | 0.0154  | 0.0005  | 0.0008  | 0.1013  | 0.0442  |
| basis | Doop   | doop   | B2u     | B1u     | A2u     | Eg(x)   | Eg(y)   | A1u     |
| min.  | 0.2794 | 0.0050 | -0.2573 | 0.0169  | -0.0034 | 0.0015  | 0.0019  | -0.1076 |
| ext.  | 0.2809 | 0.0005 | -0.2568 | 0.0169  | -0.0027 | 0.0015  | 0.0019  | -0.1076 |
|       |        |        | 0.0244  | 0.0007  | 0.0140  | -0.0006 | -0.0009 | 0.0022  |
| comp. | 0.2809 | 0.0000 | 0.2585  | 0.0170  | 0.0146  | 0.0016  | 0.0024  | 0.1076  |

**[1Co]<sup>2+</sup> -5HF:**

NSD result generated from file -5HFa\_Co-F5P-TBP-cation\_wB97X-D-6311Gss.pdb

| basis | Dip    | dip    | B2g     | B1g    | Eu(x)   | Eu(y)  | A1g     | A2g     |
|-------|--------|--------|---------|--------|---------|--------|---------|---------|
| min.  | 0.3644 | 0.0352 | 0.1978  | 0.1328 | -0.0437 | 0.1534 | -0.2209 | -0.0426 |
| ext.  | 0.4018 | 0.0183 | 0.1987  | 0.1337 | -0.0432 | 0.1540 | -0.2211 | -0.0427 |
|       |        |        | 0.1408  | 0.0452 | 0.0441  | 0.0573 | -0.0391 | -0.0037 |
| comp. | 0.4149 | 0.0000 | 0.2516  | 0.1418 | 0.0790  | 0.1657 | 0.2273  | 0.0583  |
| basis | Doop   | doop   | B2u     | B1u    | A2u     | Eg(x)  | Eg(y)   | A1u     |
| min.  | 0.9463 | 0.0247 | 0.3994  | 0.7643 | -0.2827 | 0.2236 | -0.0735 | 0.1289  |
| ext.  | 0.9583 | 0.0172 | 0.3980  | 0.7643 | -0.2789 | 0.2248 | -0.0707 | 0.1289  |
|       |        |        | -0.0761 | 0.0477 | 0.0884  | 0.0333 | 0.0747  | -0.0153 |
| comp. | 0.9640 | 0.0000 | 0.4066  | 0.7661 | 0.2963  | 0.2352 | 0.1306  | 0.1298  |

**[1Co]<sup>2+</sup> -6HF:**

NSD result generated from file -6HFa\_Co-F5P-TBP-cation\_wB97X-D-6311Gss.pdb

| basis | Dip    | dip    | B2g    | B1g     | Eu(x)   | Eu(y)   | A1g     | A2g     |
|-------|--------|--------|--------|---------|---------|---------|---------|---------|
| min.  | 0.3728 | 0.0295 | 0.0846 | -0.0072 | -0.1721 | 0.1782  | -0.2653 | -0.0068 |
| ext.  | 0.3966 | 0.0162 | 0.0853 | -0.0073 | -0.1716 | 0.1777  | -0.2655 | -0.0067 |
|       |        |        | 0.1024 | -0.0025 | 0.0448  | -0.0417 | -0.0636 | 0.0056  |
| comp. | 0.4089 | 0.0000 | 0.1415 | 0.0081  | 0.1850  | 0.1893  | 0.2775  | 0.0089  |
| basis | Doop   | doop   | B2u    | B1u     | A2u     | Eg(x)   | Eg(y)   | A1u     |
| min.  | 0.5511 | 0.0378 | 0.0012 | 0.1889  | -0.5127 | -0.0119 | 0.0340  | -0.0622 |
| ext.  | 0.5927 | 0.0065 | 0.0014 | 0.1889  | -0.5161 | -0.0066 | 0.0285  | -0.0622 |
|       |        |        | 0.0114 | -0.0060 | -0.0776 | 0.1398  | -0.1478 | -0.0076 |
| comp. | 0.5940 | 0.0000 | 0.0115 | 0.1892  | 0.5193  | 0.1412  | 0.1527  | 0.0626  |

**[1Co]<sup>2+</sup> -7HF:**

NSD result generated from file -7HF\_Co-F5P-TBP-cation\_wB97X-D-6311Gss.pdb

| basis | Dip    | dip    | B2g     | B1g    | Eu(x)   | Eu(y)   | A1g     | A2g     |
|-------|--------|--------|---------|--------|---------|---------|---------|---------|
| min.  | 0.4307 | 0.0345 | 0.0726  | 0.1669 | 0.1611  | -0.1052 | -0.3334 | -0.0645 |
| ext.  | 0.4626 | 0.0157 | 0.0733  | 0.1675 | 0.1611  | -0.1041 | -0.3337 | -0.0645 |
|       |        |        | 0.0976  | 0.0327 | -0.0002 | 0.1039  | -0.0841 | -0.0011 |
| comp. | 0.4705 | 0.0000 | 0.1248  | 0.1707 | 0.1655  | 0.1524  | 0.3480  | 0.0700  |
| basis | Doop   | doop   | B2u     | B1u    | A2u     | Eg(x)   | Eg(y)   | A1u     |
| min.  | 0.6835 | 0.0491 | 0.2430  | 0.3548 | 0.4346  | 0.2812  | -0.0503 | 0.1085  |
| ext.  | 0.7323 | 0.0195 | 0.2417  | 0.3548 | 0.4430  | 0.2869  | -0.0509 | 0.1085  |
|       |        |        | -0.0658 | 0.0627 | 0.1944  | 0.1505  | -0.0162 | -0.0122 |
| comp. | 0.7411 | 0.0000 | 0.2518  | 0.3603 | 0.4781  | 0.3225  | 0.1070  | 0.1092  |

**[1Co]<sup>2+</sup> -8HF:**

NSD result generated from file -8HF\_Co\_F5P-TBP+H\_cation\_wB97X-D-6311Gss.pdb

| basis | Dip    | dip    | B2g    | B1g     | Eu(x)   | Eu(y)   | A1g     | A2g     |
|-------|--------|--------|--------|---------|---------|---------|---------|---------|
| min.  | 0.3305 | 0.0340 | 0.0016 | 0.0133  | -0.0000 | -0.0000 | -0.3301 | 0.0068  |
| ext.  | 0.3386 | 0.0308 | 0.0016 | 0.0135  | -0.0000 | -0.0000 | -0.3303 | 0.0065  |
|       |        |        | 0.0003 | 0.0104  | 0.0000  | -0.0000 | -0.0667 | -0.0297 |
| comp. | 0.3814 | 0.0000 | 0.0033 | 0.0344  | 0.0000  | 0.0000  | 0.3763  | 0.0514  |
| basis | Doop   | doop   | B2u    | B1u     | A2u     | Eg(x)   | Eg(y)   | A1u     |
| min.  | 1.1698 | 0.0265 | 0.0032 | 0.0000  | 1.1698  | 0.0000  | 0.0000  | -0.0060 |
| ext.  | 1.1823 | 0.0083 | 0.0036 | 0.0000  | 1.1771  | 0.0000  | 0.0000  | -0.0060 |
|       |        |        | 0.0174 | -0.0000 | 0.1709  | -0.0000 | 0.0000  | -0.0001 |
| comp. | 1.1833 | 0.0000 | 0.0220 | 0.0000  | 1.1830  | 0.0000  | 0.0000  | 0.0060  |



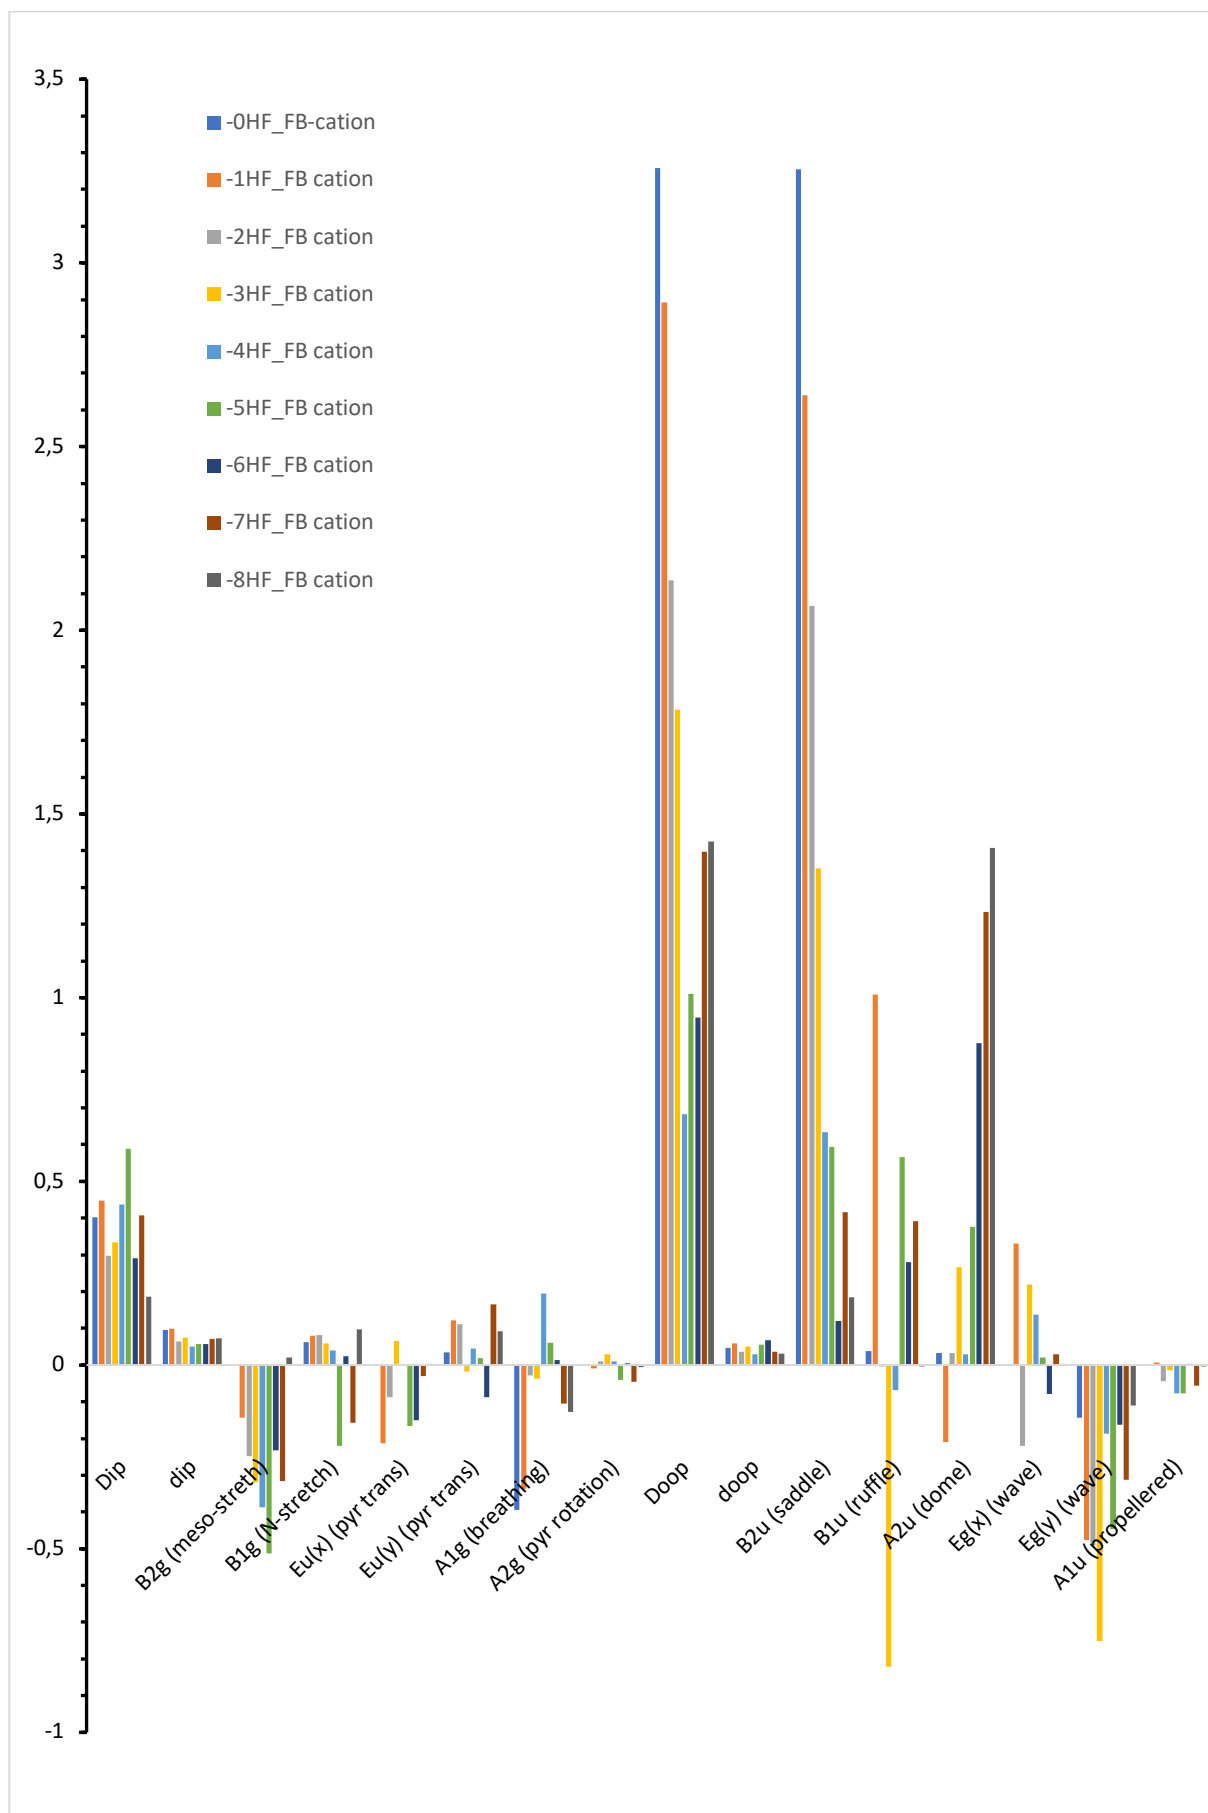

**Figure S80.** NSD of  $[1+H]^+$  and its HF-elimination intermediates, calculated at the  $\omega$ B97X-D/6-311G(d,p) level of theory.

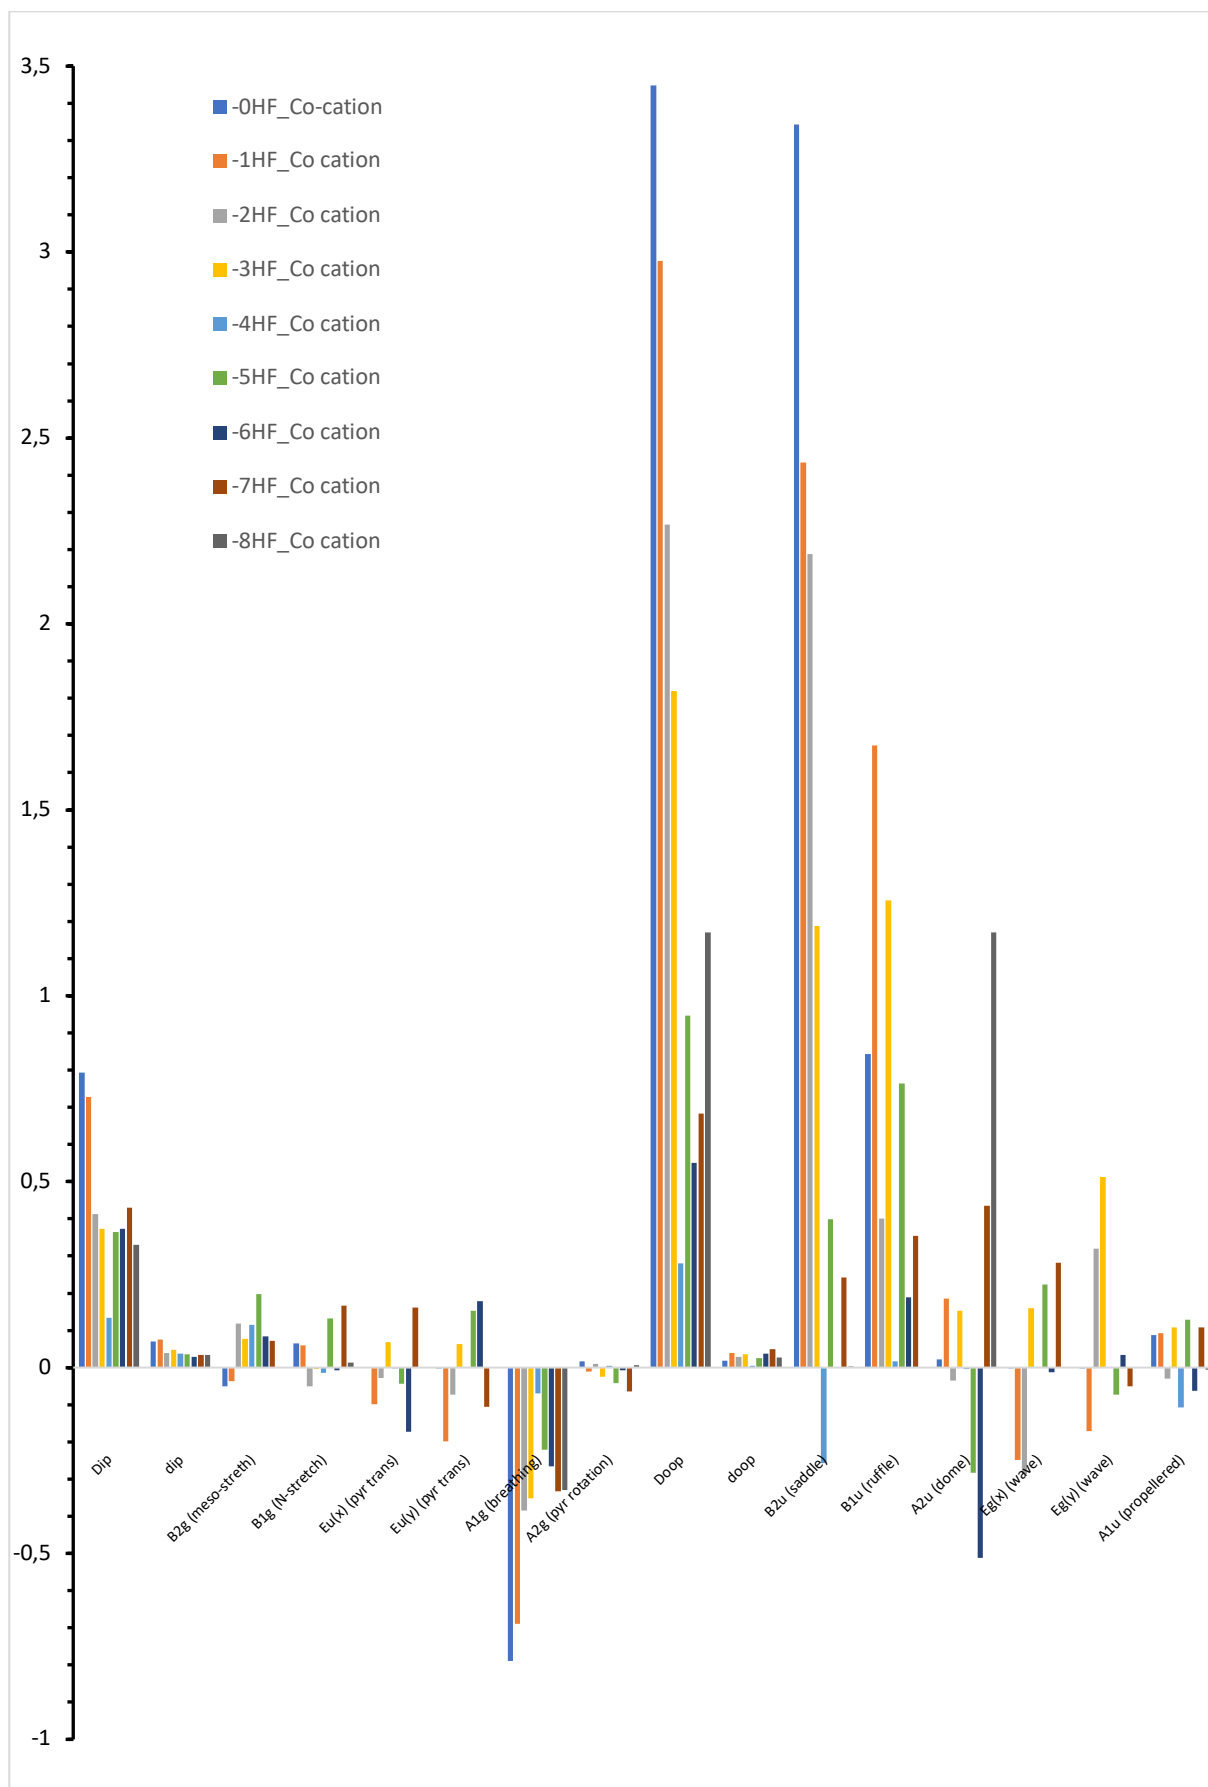

**Figure S81.** NSD of [1Co]<sup>2+</sup> and its HF-elimination intermediates, calculated at the ωB97X-D/6-311G(d,p) level of theory.

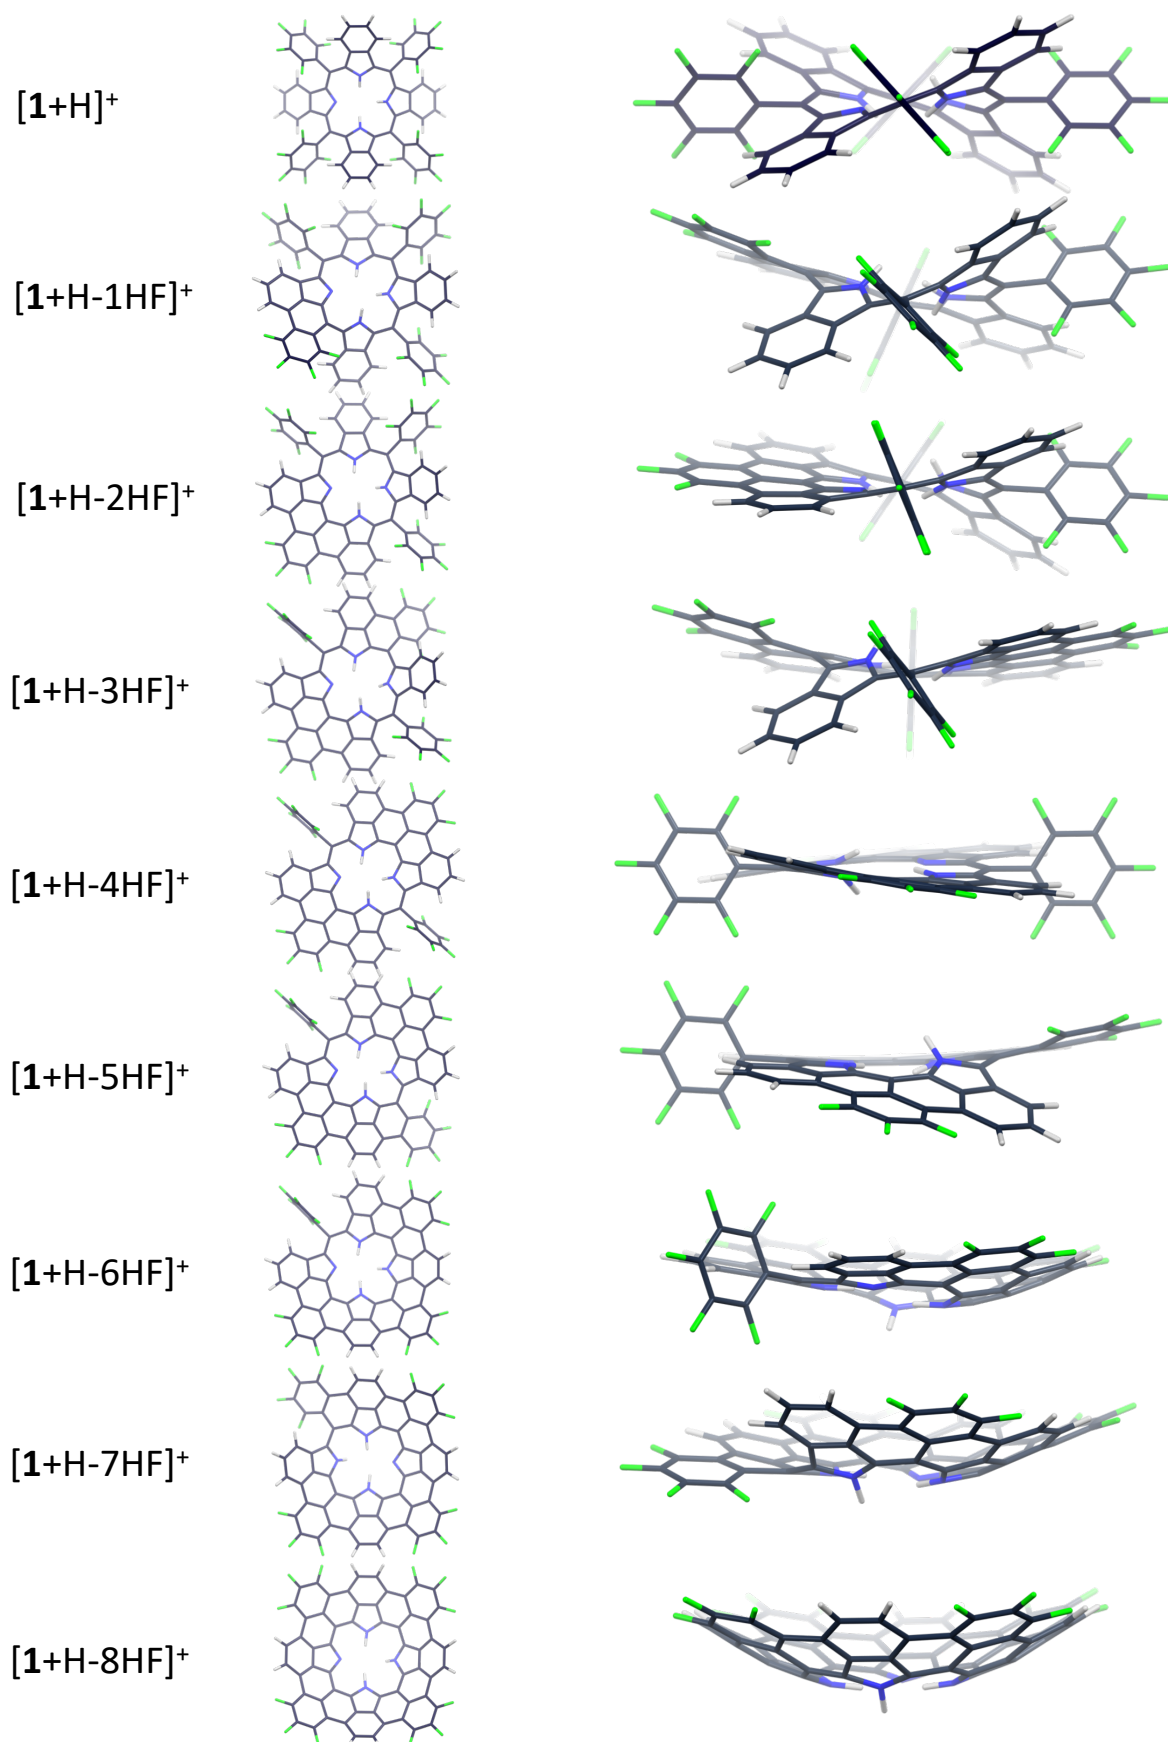

**Figure S82.** Enlarged geometry optimized structures from Figure 4 of  $[1+H-nHF]^+$ , in top and sideview.

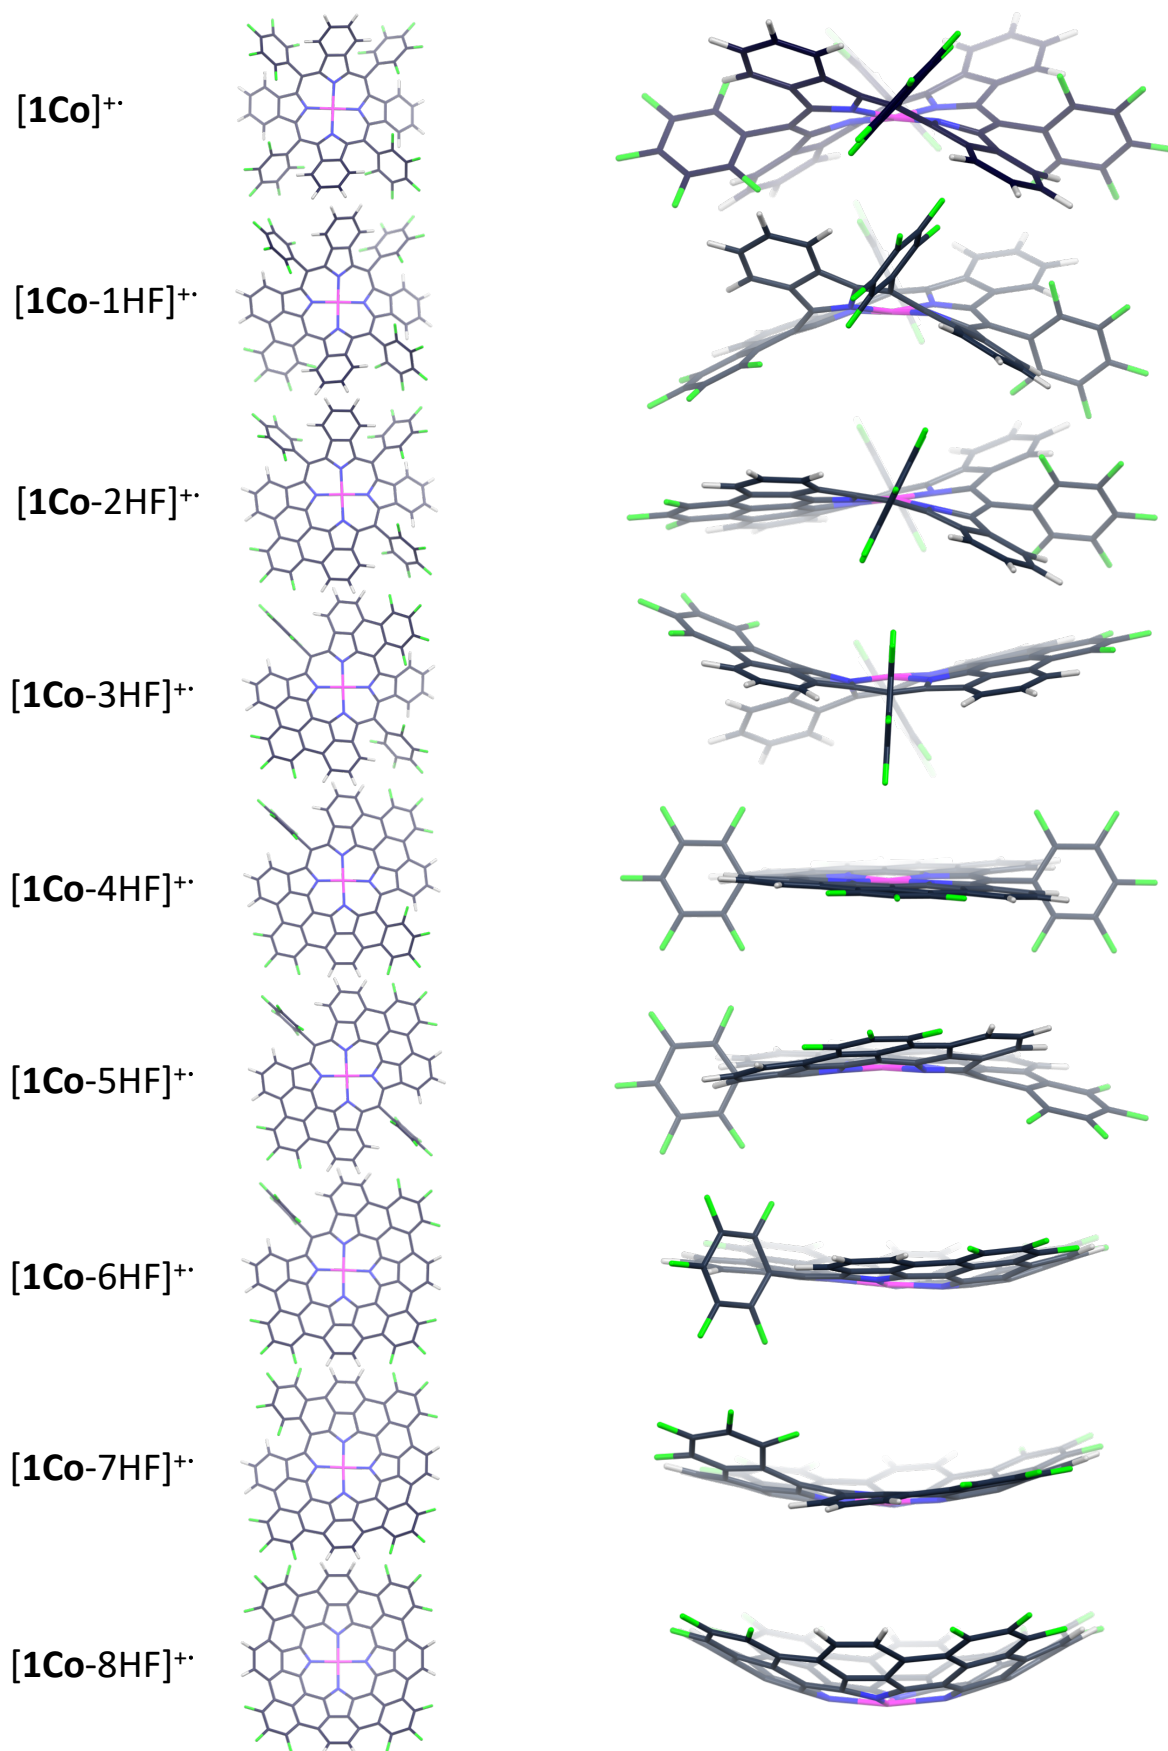

Figure S83. Enlarged geometry optimized structures from Figure 4 of  $[1\text{Co}-n\text{HF}]^{2+}$ , in top and sideview.

### 3.5 XYZ Coordinates of geometry optimized structures

[1+H]<sup>+</sup>

$E_{\text{abs}} = -4513.036710$  hartrees

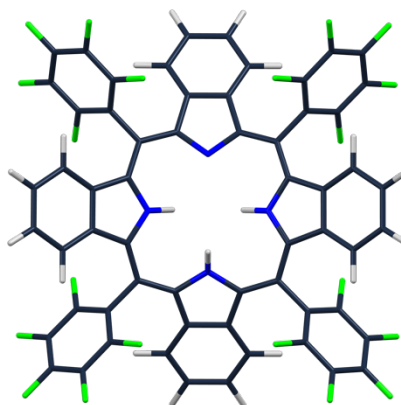

| Atom | X         | Y         | Z         |
|------|-----------|-----------|-----------|
| C1   | -2.811977 | 0.356982  | 1.122067  |
| C2   | -3.340693 | 1.100246  | 2.225594  |
| C3   | -2.358945 | 1.112076  | 3.242364  |
| C4   | -1.230230 | 0.372813  | 2.762511  |
| C5   | -0.064703 | -0.025837 | 3.433867  |
| C6   | 1.115417  | -0.411237 | 2.815459  |
| C7   | 2.281017  | -1.058239 | 3.379218  |
| C8   | 3.288616  | -1.051131 | 2.394964  |
| C9   | 2.743589  | -0.395248 | 1.223369  |
| C10  | 3.379795  | 0.026824  | 0.056642  |
| N11  | 1.439997  | -0.124980 | 1.509889  |
| C12  | 2.725357  | 0.466356  | -1.104232 |
| C13  | 3.380363  | 1.073641  | -2.274948 |
| C14  | 2.408575  | 1.085097  | -3.280583 |
| C15  | 1.210496  | 0.480765  | -2.674929 |
| C16  | 0.074862  | 0.051230  | -3.376589 |
| C17  | -1.113859 | -0.383488 | -2.789646 |
| C18  | -2.257817 | -1.044743 | -3.384228 |
| C19  | -3.277253 | -1.075007 | -2.412413 |
| C20  | -2.764867 | -0.430567 | -1.222383 |
| C21  | -3.433048 | -0.053277 | -0.066768 |
| N22  | -1.451068 | -0.128223 | -1.495825 |
| H23  | 0.885320  | 0.428383  | 0.872166  |
| H24  | -0.841958 | 0.426763  | -0.911843 |
| N25  | 1.412692  | 0.241045  | -1.355341 |
| N26  | -1.527353 | 0.005630  | 1.469849  |
| H27  | -1.671030 | -1.681417 | -5.375846 |
| C28  | -2.449365 | -1.660345 | -4.627486 |
| H29  | -5.268546 | -1.787732 | -1.926609 |
| C30  | -4.490412 | -1.722318 | -2.673666 |
| H31  | -5.602394 | -2.812009 | -4.130608 |
| C32  | -4.670536 | -2.306190 | -3.909707 |
| H33  | -3.822009 | -2.756076 | -5.835237 |
| C34  | -3.657910 | -2.274509 | -4.879152 |
| H35  | -5.293155 | 1.838603  | 1.614746  |
| C36  | -4.544736 | 1.807719  | 2.393598  |
| H37  | -1.824554 | 1.879661  | 5.205807  |
| C38  | -2.576762 | 1.831519  | 4.431336  |

|     |           |           |           |
|-----|-----------|-----------|-----------|
| H39 | -3.956528 | 3.053396  | 5.494958  |
| C40 | -3.768909 | 2.495329  | 4.585654  |
| H41 | -5.669516 | 3.033836  | 3.720618  |
| C42 | -4.748084 | 2.483457  | 3.571724  |
| H43 | 1.719509  | -1.737932 | 5.362349  |
| C44 | 2.493111  | -1.691466 | 4.609229  |
| H45 | 5.290237  | -1.718689 | 1.883639  |
| C46 | 4.516740  | -1.679150 | 2.636380  |
| H47 | 5.662942  | -2.771802 | 4.063538  |
| C48 | 4.719312  | -2.280611 | 3.860527  |
| H49 | 3.898523  | -2.781223 | 5.785434  |
| C50 | 3.715646  | -2.286367 | 4.839537  |
| H51 | 5.381147  | 1.696866  | -1.714962 |
| C52 | 4.626134  | 1.657812  | -2.486503 |
| H53 | 1.919864  | 1.739220  | -5.289369 |
| C54 | 2.667060  | 1.682385  | -4.511147 |
| H55 | 4.131868  | 2.724679  | -5.670660 |
| C56 | 3.915314  | 2.249937  | -4.721584 |
| H57 | 5.845974  | 2.701590  | -3.900108 |
| C58 | 4.884193  | 2.237071  | -3.720547 |
| C59 | -4.915748 | -0.053617 | -0.085597 |
| C60 | -7.708794 | -0.038952 | -0.095456 |
| C61 | -5.624869 | 0.811086  | -0.913340 |
| C62 | -5.639870 | -0.908131 | 0.738628  |
| C63 | -7.024699 | -0.909513 | 0.742709  |
| C64 | -7.009268 | 0.825450  | -0.927858 |
| C65 | 4.863394  | -0.027022 | 0.050753  |
| C66 | 7.654182  | -0.128842 | 0.040954  |
| C67 | 5.614581  | 0.838575  | 0.837146  |
| C68 | 5.542953  | -0.946693 | -0.739334 |
| C69 | 6.926806  | -1.005171 | -0.753850 |
| C70 | 6.998836  | 0.797910  | 0.841389  |

|     |           |           |           |
|-----|-----------|-----------|-----------|
| C71 | 0.133812  | 0.018456  | -4.859676 |
| C72 | 0.240218  | -0.040812 | -7.649362 |
| C73 | -0.627414 | 0.894566  | -5.624350 |
| C74 | 0.947163  | -0.891141 | -5.525117 |
| C75 | 1.009847  | -0.928140 | -6.908334 |
| C76 | -0.583478 | 0.875372  | -7.008372 |
| C77 | -0.102948 | -0.009669 | 4.916102  |
| C78 | -0.196943 | 0.035383  | 7.706972  |
| C79 | -0.951741 | -0.858598 | 5.618259  |
| C80 | 0.696287  | 0.864673  | 5.645930  |
| C81 | 0.659220  | 0.894330  | 7.029640  |
| C82 | -1.007384 | -0.844781 | 7.001823  |
| F83 | -4.999061 | -1.750044 | 1.541629  |
| F84 | -7.695584 | -1.731253 | 1.532060  |
| F85 | -9.027247 | -0.032447 | -0.101116 |
| F86 | -7.666105 | 1.654408  | -1.721501 |
| F87 | -4.970912 | 1.650657  | -1.707499 |

|      |           |           |           |
|------|-----------|-----------|-----------|
| F88  | -1.418490 | 1.777204  | -5.022871 |
| F89  | -1.315108 | 1.717908  | -7.719459 |
| F90  | 0.291476  | -0.068728 | -8.967629 |
| F91  | 1.791469  | -1.798980 | -7.525383 |
| F92  | 1.685614  | -1.747856 | -4.830152 |
| F93  | 4.861053  | -1.792939 | -1.501741 |
| F94  | 7.557062  | -1.885947 | -1.513588 |
| F95  | 8.972863  | -0.177055 | 0.035882  |
| F96  | 7.696872  | 1.630174  | 1.597007  |
| F97  | 4.999736  | 1.731196  | 1.606433  |
| F98  | 1.512979  | 1.698632  | 5.012694  |
| F99  | 1.426302  | 1.732305  | 7.706511  |
| F100 | -0.240498 | 0.056172  | 9.024497  |
| F101 | -1.819521 | -1.661119 | 7.652002  |
| F102 | -1.728308 | -1.709762 | 4.957164  |
| H103 | -1.054187 | -0.768365 | 1.021283  |

[1-HF+H]<sup>+</sup>

$E_{\text{abs}} = -4412.614932$  hartrees

| Atom | X         | Y         | Z         |
|------|-----------|-----------|-----------|
| C1   | -0.238635 | -2.845826 | 1.011023  |
| C2   | -0.984914 | -3.426068 | 2.077177  |
| C3   | -1.209414 | -2.413306 | 3.040191  |
| C4   | -0.544602 | -1.229611 | 2.585089  |
| C5   | -0.259345 | -0.033717 | 3.297598  |
| C6   | 0.179050  | 1.149985  | 2.749245  |
| C7   | 0.749380  | 2.311157  | 3.429565  |
| C8   | 0.952944  | 3.314120  | 2.466806  |
| C9   | 0.492749  | 2.789613  | 1.184588  |
| C10  | 0.334784  | 3.433506  | -0.023538 |
| N11  | 0.133757  | 1.486631  | 1.412375  |
| C12  | -0.099366 | 2.800114  | -1.219684 |
| C13  | -0.432258 | 3.505468  | -2.481923 |
| C14  | -0.764745 | 2.478288  | -3.361246 |
| C15  | -0.595070 | 1.243979  | -2.665515 |
| C16  | -0.633842 | 0.074140  | -3.400515 |
| C17  | -0.043291 | -1.126673 | -2.887331 |
| C18  | 0.831609  | -2.070226 | -3.513797 |
| C19  | 1.145614  | -3.055599 | -2.554288 |
| C20  | 0.460234  | -2.705404 | -1.340636 |

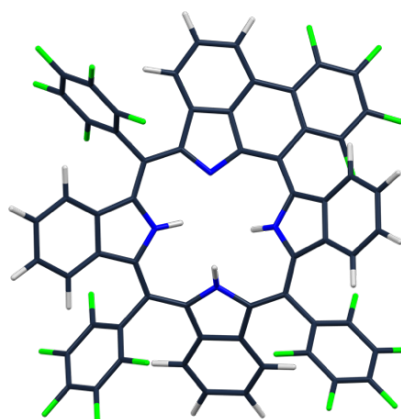

|     |           |           |           |
|-----|-----------|-----------|-----------|
| C21 | 0.253653  | -3.415967 | -0.168266 |
| N22 | -0.173696 | -1.500923 | -1.606404 |
| H23 | -0.311002 | 0.971135  | 0.658610  |
| H24 | -0.819678 | -1.046169 | -0.978687 |
| N25 | -0.223414 | 1.472816  | -1.357822 |
| N26 | -0.051373 | -1.513888 | 1.345456  |
| H27 | 1.179272  | -1.328649 | -5.521399 |
| C28 | 1.402902  | -2.098985 | -4.793659 |
| H29 | 2.320500  | -4.836245 | -2.144773 |
| C30 | 2.040860  | -4.086525 | -2.872984 |
| H31 | 3.271585  | -4.901880 | -4.407559 |
| C32 | 2.578895  | -4.112874 | -4.140362 |
| H33 | 2.719857  | -3.176942 | -6.077199 |
| C34 | 2.264625  | -3.126662 | -5.095848 |

|     |           |           |           |      |           |           |           |
|-----|-----------|-----------|-----------|------|-----------|-----------|-----------|
| H35 | -1.398760 | -5.481597 | 1.503023  | C69  | -0.068183 | 7.177749  | 0.327844  |
| C36 | -1.546311 | -4.705851 | 2.242027  | C70  | -1.152289 | 0.151127  | -4.772155 |
| H37 | -2.237388 | -1.911398 | 4.893536  | C71  | -2.196138 | 0.228113  | -7.386131 |
| C38 | -2.013497 | -2.679105 | 4.166982  | C72  | -1.605866 | -1.004901 | -5.424711 |
| H39 | -3.156703 | -4.159539 | 5.178664  | C73  | -1.337431 | 1.401325  | -5.436226 |
| C40 | -2.537128 | -3.937899 | 4.318437  | C74  | -1.835688 | 1.392971  | -6.741442 |
| H41 | -2.735386 | -5.929411 | 3.512132  | C75  | -2.091482 | -0.982115 | -6.714325 |
| C42 | -2.299443 | -4.949027 | 3.362693  | C76  | -0.424662 | -0.106011 | 4.770690  |
| H43 | 1.047956  | 1.740448  | 5.500164  | C77  | -0.767015 | -0.291497 | 7.536309  |
| C44 | 1.160937  | 2.507232  | 4.749001  | C78  | 0.402406  | -0.913838 | 5.542808  |
| H45 | 1.752513  | 5.294364  | 2.093444  | C79  | -1.428550 | 0.606612  | 5.416857  |
| C46 | 1.559751  | 4.520316  | 2.820065  | C80  | -1.606168 | 0.524169  | 6.787990  |
| H47 | 2.415906  | 5.642207  | 4.422588  | C81  | 0.241934  | -1.015505 | 6.914394  |
| C48 | 1.943067  | 4.711183  | 4.135020  | F82  | 2.157841  | -4.621002 | 1.511677  |
| H49 | 2.069763  | 3.877229  | 6.111110  | F83  | 2.639651  | -7.271347 | 1.545568  |
| C50 | 1.746932  | 3.712459  | 5.090484  | F84  | 1.266453  | -8.914189 | -0.110054 |
| H51 | -0.219975 | 5.665621  | -2.347871 | F85  | -0.592998 | -7.911123 | -1.799465 |
| C52 | -0.454567 | 4.807485  | -2.959980 | F86  | -1.092868 | -5.265156 | -1.832358 |
| C53 | -1.059268 | 2.633644  | -4.705158 | F87  | -1.614512 | -2.187576 | -4.807483 |
| H54 | -1.290668 | 4.185804  | -6.204389 | F88  | -2.487519 | -2.098969 | -7.299017 |
| C55 | -1.068517 | 3.960519  | -5.172907 | F89  | -2.668276 | 0.260225  | -8.618237 |
| H56 | -0.804463 | 6.017747  | -4.691183 | F90  | -2.012698 | 2.529485  | -7.413916 |
| C57 | -0.784750 | 5.005888  | -4.304900 | F91  | 2.721594  | 4.511856  | -1.044552 |
| C58 | 0.524296  | -4.871572 | -0.165312 | F92  | 3.229256  | 7.163630  | -1.154177 |
| C59 | 1.028612  | -7.617841 | -0.127059 | F93  | 1.385191  | 8.925599  | -0.246521 |
| C60 | -0.166457 | -5.738472 | -1.008074 | F94  | -0.964115 | 8.045248  | 0.769457  |
| C61 | 1.471270  | -5.414743 | 0.697986  | F95  | -1.470518 | 5.394690  | 0.883176  |
| C62 | 1.730878  | -6.774673 | 0.723751  | F96  | -2.243401 | 1.385607  | 4.714547  |
| C63 | 0.076352  | -7.101345 | -0.996692 | F97  | -2.566273 | 1.209824  | 7.386067  |
| C64 | 0.614431  | 4.890549  | -0.076853 | F98  | -0.928958 | -0.378707 | 8.842318  |
| C65 | 1.137431  | 7.630423  | -0.192874 | F99  | 1.038625  | -1.789899 | 7.631872  |
| C66 | -0.316202 | 5.815409  | 0.379287  | F100 | 1.373574  | -1.608423 | 4.960077  |
| C67 | 1.811630  | 5.368560  | -0.594250 | H101 | 0.685456  | -0.966994 | 0.919164  |
| C68 | 2.083767  | 6.725596  | -0.657231 |      |           |           |           |

[1-2HF+H]<sup>+</sup>

E<sub>abs</sub> = -4312.204021 hartrees

| Atom | X         | Y         | Z         |
|------|-----------|-----------|-----------|
| C1   | -2.905035 | 0.224532  | 0.989645  |
| C2   | -3.447828 | 0.883703  | 2.133822  |
| C3   | -2.438737 | 0.921419  | 3.125898  |
| C4   | -1.283518 | 0.262755  | 2.596618  |
| C5   | -0.078939 | -0.070627 | 3.244407  |
| C6   | 1.144346  | -0.363816 | 2.658895  |
| C7   | 2.345075  | -0.873741 | 3.295920  |
| C8   | 3.399506  | -0.771330 | 2.367203  |
| C9   | 2.840584  | -0.246010 | 1.138225  |
| C10  | 3.481776  | 0.078126  | -0.065245 |
| N11  | 1.508398  | -0.084690 | 1.357338  |
| C12  | 2.833757  | 0.342301  | -1.271657 |
| C13  | 3.509920  | 0.582827  | -2.571985 |
| C14  | 2.482059  | 0.472356  | -3.502054 |
| C15  | 1.275496  | 0.272531  | -2.781271 |
| C16  | 0.097273  | 0.084817  | -3.511300 |
| C17  | -1.134490 | -0.099739 | -2.906564 |
| C18  | -2.281739 | -0.419464 | -3.642330 |
| C19  | -3.363991 | -0.565240 | -2.765926 |
| C20  | -2.847389 | -0.249308 | -1.437486 |
| C21  | -3.519368 | -0.061606 | -0.248856 |
| N22  | -1.485648 | -0.029342 | -1.600646 |
| H23  | 0.936771  | 0.336677  | 0.635485  |
| H24  | -0.856853 | 0.353504  | -0.911120 |
| N25  | 1.480909  | 0.237422  | -1.447590 |
| N26  | -1.597643 | -0.085060 | 1.299447  |
| C27  | -2.305122 | -0.565442 | -5.025571 |
| H28  | -5.465031 | -1.130525 | -2.708522 |
| C29  | -4.583897 | -0.958858 | -3.311044 |
| H30  | -5.579898 | -1.445955 | -5.132690 |
| C31  | -4.639481 | -1.139400 | -4.690298 |
| H32  | -3.693532 | -1.090249 | -6.603382 |
| C33  | -3.549392 | -0.940428 | -5.545031 |
| H34  | -5.468750 | 1.506314  | 1.612115  |
| C35  | -4.691482 | 1.507182  | 2.361516  |
| H36  | -1.902570 | 1.683065  | 5.094452  |
| C37  | -2.669423 | 1.601941  | 4.338682  |
| H38  | -4.085062 | 2.708448  | 5.474309  |
| C39  | -3.892921 | 2.185932  | 4.545163  |
| H40  | -5.855260 | 2.612734  | 3.755269  |

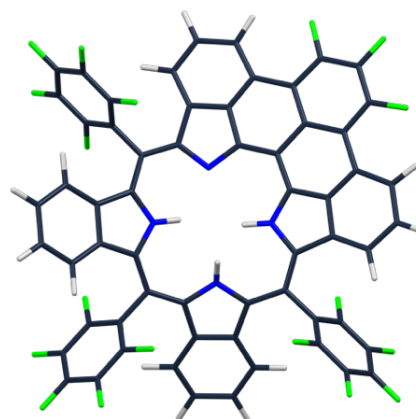

|     |           |           |           |
|-----|-----------|-----------|-----------|
| C41 | -4.903058 | 2.133846  | 3.562242  |
| H42 | 1.760528  | -1.604390 | 5.255847  |
| C43 | 2.563412  | -1.461233 | 4.548264  |
| H44 | 5.510212  | -1.149120 | 2.014804  |
| C45 | 4.685743  | -1.211824 | 2.707641  |
| H46 | 5.880229  | -2.100035 | 4.233220  |
| C47 | 4.891351  | -1.754935 | 3.957541  |
| H48 | 4.016252  | -2.347194 | 5.832056  |
| C49 | 3.834627  | -1.889552 | 4.867124  |
| H50 | 5.637336  | 1.006183  | -2.399566 |
| C51 | 4.783202  | 0.863371  | -3.046300 |
| C52 | 2.604261  | 0.537900  | -4.878974 |
| H53 | 4.119575  | 0.898175  | -6.392759 |
| C54 | 3.904816  | 0.811414  | -5.339301 |
| H55 | 5.930867  | 1.208269  | -4.818936 |
| C56 | 4.945052  | 0.981499  | -4.430931 |
| C57 | -5.002329 | -0.095916 | -0.282190 |
| C58 | -7.793195 | -0.159892 | -0.301897 |
| C59 | -5.736396 | 0.899422  | -0.918956 |
| C60 | -5.698534 | -1.121895 | 0.344972  |
| C61 | -7.083572 | -1.164661 | 0.341874  |
| C62 | -7.120475 | 0.877455  | -0.936315 |
| C63 | 4.967503  | 0.066206  | -0.069691 |
| C64 | 7.758166  | 0.055519  | -0.089948 |
| C65 | 5.688389  | 1.143737  | 0.426104  |
| C66 | 5.674336  | -1.018399 | -0.574996 |
| C67 | 7.058814  | -1.035537 | -0.591284 |
| C68 | 7.074677  | 1.150571  | 0.421468  |
| C69 | 0.146501  | 0.024537  | -4.974718 |
| C70 | 0.241972  | -0.063271 | -7.766753 |
| C71 | -1.036278 | -0.293651 | -5.714995 |
| C72 | 1.379794  | 0.279926  | -5.648457 |
| C73 | 1.379090  | 0.231649  | -7.039802 |



|     |           |           |           |
|-----|-----------|-----------|-----------|
| C74 | -0.940332 | -0.325752 | -7.104152 |
| C75 | -0.131439 | -0.066247 | 4.729200  |
| C76 | -0.263384 | -0.041465 | 7.517454  |
| C77 | -0.901906 | -0.996124 | 5.417060  |
| C78 | 0.569136  | 0.879766  | 5.470020  |
| C79 | 0.512394  | 0.900437  | 6.853167  |
| C80 | -0.975152 | -0.994067 | 6.800223  |
| F81 | -5.030738 | -2.086767 | 0.966771  |
| F82 | -7.728799 | -2.149724 | 0.942690  |
| F83 | -9.111399 | -0.189365 | -0.311953 |
| F84 | -7.802824 | 1.832796  | -1.545577 |
| F85 | -5.106571 | 1.902968  | -1.519456 |
| F86 | -1.997056 | -0.608484 | -7.860236 |

|     |           |           |           |
|-----|-----------|-----------|-----------|
| F87 | 0.287229  | -0.099921 | -9.087299 |
| F88 | 2.485655  | 0.462368  | -7.739014 |
| F89 | 5.015345  | -2.067603 | -1.053172 |
| F90 | 7.716824  | -2.075632 | -1.077076 |
| F91 | 9.077711  | 0.049962  | -0.099497 |
| F92 | 7.746304  | 2.185084  | 0.899100  |
| F93 | 5.044916  | 2.194134  | 0.922259  |
| F94 | 1.305275  | 1.793993  | 4.849158  |
| F95 | 1.183731  | 1.807651  | 7.542399  |
| F96 | -0.324988 | -0.029777 | 8.834555  |
| F97 | -1.711116 | -1.888454 | 7.437950  |
| F98 | -1.582715 | -1.916840 | 4.743565  |
| H99 | -1.111800 | -0.838867 | 0.831634  |

### [1-3HF+H]<sup>+</sup>

$E_{\text{abs}} = -4211.785929$  hartrees

| Atom | X         | Y         | Z         |
|------|-----------|-----------|-----------|
| C1   | -2.879958 | 0.280104  | 1.080805  |
| C2   | -3.297985 | 0.948517  | 2.265197  |
| C3   | -2.306187 | 0.724953  | 3.251897  |
| C4   | -1.305126 | -0.094594 | 2.676100  |
| C5   | -0.077058 | -0.558217 | 3.259856  |
| C6   | 1.138490  | -0.430402 | 2.627216  |
| C7   | 2.341236  | -0.449853 | 3.380080  |
| C8   | 3.411526  | -0.080004 | 2.557143  |
| C9   | 2.846123  | 0.094910  | 1.221745  |
| C10  | 3.490960  | 0.326430  | 0.015035  |
| N11  | 1.494988  | -0.085770 | 1.339849  |
| C12  | 2.842312  | 0.312086  | -1.233960 |
| C13  | 3.523009  | 0.354338  | -2.553062 |
| C14  | 2.494017  | 0.128815  | -3.464154 |
| C15  | 1.285672  | 0.025073  | -2.730945 |
| C16  | 0.105106  | -0.186759 | -3.427491 |
| C17  | -1.148312 | -0.240528 | -2.806318 |
| C18  | -2.315015 | -0.521883 | -3.525352 |
| C19  | -3.414424 | -0.475697 | -2.656608 |
| C20  | -2.879982 | -0.125247 | -1.354625 |
| C21  | -3.522240 | 0.143564  | -0.164990 |
| N22  | -1.493757 | -0.033497 | -1.519169 |
| H23  | 0.935118  | -0.059985 | 0.491265  |
| H24  | -0.856723 | 0.395446  | -0.863199 |

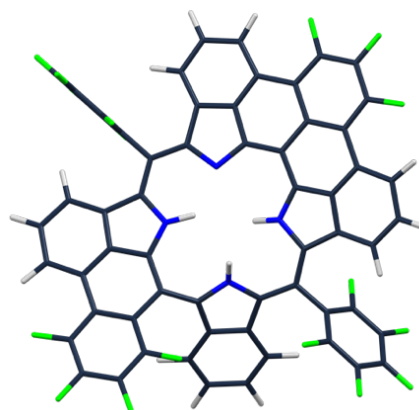

|     |           |           |           |
|-----|-----------|-----------|-----------|
| N25 | 1.506418  | 0.146524  | -1.389124 |
| N26 | -1.649414 | -0.289005 | 1.374380  |
| C27 | -2.351779 | -0.781447 | -4.894667 |
| H28 | -5.568036 | -0.791707 | -2.583170 |
| C29 | -4.670293 | -0.777479 | -3.185700 |
| H30 | -5.702324 | -1.299794 | -4.974054 |
| C31 | -4.736434 | -1.066081 | -4.542002 |
| H32 | -3.780854 | -1.281347 | -6.440267 |
| C33 | -3.623239 | -1.062223 | -5.396396 |
| H34 | -5.157775 | 1.992400  | 1.816614  |
| C35 | -4.397274 | 1.783869  | 2.556123  |
| H36 | -1.623489 | 1.189633  | 5.262733  |
| C37 | -2.396860 | 1.335629  | 4.519211  |
| H38 | -3.581090 | 2.601336  | 5.751923  |
| C39 | -3.483116 | 2.125075  | 4.784202  |
| H40 | -5.322432 | 2.981923  | 4.046431  |
| C41 | -4.480993 | 2.343863  | 3.804320  |

|     |           |           |           |     |           |           |           |
|-----|-----------|-----------|-----------|-----|-----------|-----------|-----------|
| C42 | 2.424054  | -0.648748 | 4.752956  | C70 | -1.060372 | -0.689683 | -5.594399 |
| H43 | 5.532739  | 0.385704  | 2.564991  | C71 | 1.386666  | -0.270287 | -5.573562 |
| C44 | 4.665665  | 0.083406  | 3.134364  | C72 | 1.383427  | -0.470567 | -6.954622 |
| H45 | 5.750525  | -0.001319 | 4.973939  | C73 | -0.966077 | -0.878148 | -6.968678 |
| C46 | 4.781495  | -0.129077 | 4.506632  | C74 | -0.032629 | -1.022007 | 4.654662  |
| H47 | 3.863807  | -0.613595 | 6.368635  | C75 | -0.031899 | -1.924466 | 7.320793  |
| C48 | 3.700476  | -0.481921 | 5.310470  | C76 | -1.175014 | -1.579710 | 5.247913  |
| H49 | 5.661407  | 0.727673  | -2.426624 | C77 | 1.177206  | -1.025613 | 5.411980  |
| C50 | 4.803069  | 0.529150  | -3.052211 | C78 | 1.128915  | -1.459049 | 6.739730  |
| C51 | 2.618301  | 0.023964  | -4.837423 | C79 | -1.191847 | -1.997330 | 6.561468  |
| H52 | 4.147431  | 0.150563  | -6.378599 | F80 | -5.313895 | -1.602339 | 1.114869  |
| C53 | 3.929659  | 0.202151  | -5.323617 | F81 | -7.986868 | -1.251001 | 1.112597  |
| H54 | 5.966170  | 0.592885  | -4.849842 | F82 | -9.069200 | 0.859937  | -0.191150 |
| C55 | 4.972458  | 0.452945  | -4.441688 | F83 | -7.481719 | 2.621240  | -1.496194 |
| C56 | -4.993054 | 0.326875  | -0.192149 | F84 | -4.809031 | 2.279725  | -1.494771 |
| C57 | -7.762020 | 0.688620  | -0.191092 | F85 | -2.036656 | -1.169161 | -7.700637 |
| C58 | -5.574861 | 1.401946  | -0.856808 | F86 | 0.271223  | -0.956137 | -8.958440 |
| C59 | -5.831087 | -0.562198 | 0.472162  | F87 | 2.503293  | -0.384203 | -7.665670 |
| C60 | -7.205794 | -0.393133 | 0.478639  | F88 | 5.281137  | -1.834246 | -0.108828 |
| C61 | -6.946415 | 1.591084  | -0.862210 | F89 | 7.967713  | -1.547599 | -0.056392 |
| C62 | 4.966459  | 0.488729  | 0.047704  | F90 | 9.053480  | 0.925092  | 0.129177  |
| C63 | 7.741584  | 0.784922  | 0.102815  | F91 | 7.463102  | 3.111661  | 0.261338  |
| C64 | 5.547982  | 1.746122  | 0.142593  | F92 | 4.776622  | 2.825015  | 0.209432  |
| C65 | 5.805173  | -0.617235 | -0.017795 | F93 | 2.224941  | -1.468584 | 7.496900  |
| C66 | 7.183622  | -0.483926 | 0.008297  | F94 | -0.038288 | -2.330867 | 8.575999  |
| C67 | 6.924816  | 1.906499  | 0.170305  | F95 | -2.295212 | -2.495714 | 7.089189  |
| C68 | 0.142869  | -0.382599 | -4.880676 | F96 | -2.299546 | -1.754231 | 4.554914  |
| C69 | 0.232789  | -0.770817 | -7.650310 | H97 | -1.271603 | -1.053362 | 0.832050  |

### [1-4HF+H]<sup>+</sup>

$E_{\text{abs}} = -4111.375028$  hartrees

| Atom | X        | Y         | Z         |
|------|----------|-----------|-----------|
| C1   | 1.175334 | -0.008619 | -2.955063 |
| C2   | 2.472749 | -0.251047 | -3.532152 |
| C3   | 3.392985 | -0.156940 | -2.474365 |
| C4   | 2.712396 | 0.095953  | -1.285542 |
| C5   | 3.372780 | 0.130708  | -0.058066 |
| C6   | 2.742025 | 0.158124  | 1.180932  |
| C7   | 3.492040 | 0.217452  | 2.367202  |
| C8   | 2.625296 | 0.199660  | 3.469142  |
| C9   | 1.288606 | 0.094054  | 2.910979  |

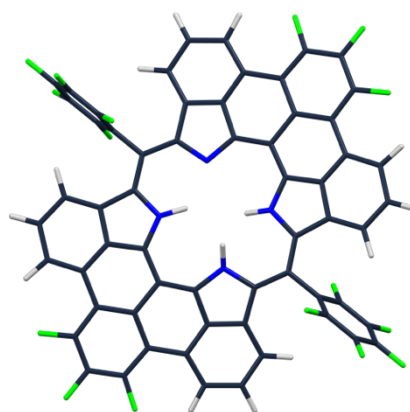

|     |          |           |          |
|-----|----------|-----------|----------|
| C10 | 0.056794 | -0.040724 | 3.543103 |
| N11 | 1.426268 | 0.100834  | 1.545722 |

|     |           |           |           |     |           |           |           |
|-----|-----------|-----------|-----------|-----|-----------|-----------|-----------|
| C12 | -1.176225 | -0.144336 | 2.884755  | C54 | -4.378118 | -0.397977 | 4.996192  |
| C13 | -2.490936 | -0.240046 | 3.549817  | C55 | -0.109173 | 0.015595  | -5.048019 |
| C14 | -3.401788 | -0.199146 | 2.497583  | C56 | -0.154190 | -0.013042 | -7.837608 |
| C15 | -2.662028 | -0.125095 | 1.287888  | C57 | -0.452497 | -1.136926 | -5.744092 |
| C16 | -3.372672 | -0.052840 | 0.080327  | C58 | 0.212127  | 1.152893  | -5.778231 |
| C17 | -2.769003 | 0.007485  | -1.171739 | C59 | 0.192967  | 1.151034  | -7.163578 |
| C18 | -3.504499 | 0.217477  | -2.342918 | C60 | -0.478654 | -1.163037 | -7.129000 |
| C19 | -2.630555 | 0.282297  | -3.438083 | C61 | 0.075804  | -0.068509 | 5.028284  |
| C20 | -1.300003 | 0.074149  | -2.900267 | C62 | 0.121944  | -0.125653 | 7.817066  |
| C21 | -0.080071 | 0.030057  | -3.563972 | C63 | 0.232375  | -1.265528 | 5.714149  |
| N22 | -1.456627 | -0.073123 | -1.527786 | C64 | -0.052444 | 1.100063  | 5.767088  |
| H23 | 0.580595  | -0.013991 | 0.989953  | C65 | -0.032537 | 1.084627  | 7.152718  |
| H24 | -0.774043 | -0.477912 | -0.905448 | C66 | 0.256291  | -1.307188 | 7.099106  |
| N25 | -1.327347 | -0.106580 | 1.525922  | C67 | -4.842407 | 0.015617  | 0.112314  |
| N26 | 1.376989  | 0.184573  | -1.590793 | C68 | -7.643129 | 0.107254  | 0.175643  |
| C27 | -4.890583 | 0.346161  | -2.388010 | C69 | -5.580201 | 0.201500  | -1.101364 |
| H28 | -2.586331 | 0.628438  | -5.590083 | C70 | -5.532105 | -0.099339 | 1.358893  |
| C29 | -3.184098 | 0.540187  | -4.694381 | C71 | -6.924085 | -0.055508 | 1.342060  |
| H30 | -5.010798 | 0.879604  | -5.736071 | C72 | -6.970090 | 0.239522  | -1.021179 |
| C31 | -4.562578 | 0.684150  | -4.769270 | C73 | 4.842324  | 0.064492  | -0.081659 |
| H32 | -6.473863 | 0.702029  | -3.819333 | C74 | 7.639506  | 0.010283  | -0.137125 |
| C33 | -5.413928 | 0.585052  | -3.660795 | C75 | 5.525528  | -0.127043 | -1.323997 |
| H34 | 2.338087  | -0.687169 | -5.666331 | C76 | 5.578988  | 0.181112  | 1.137384  |
| C35 | 2.974723  | -0.569991 | -4.801206 | C77 | 6.970449  | 0.161284  | 1.059847  |
| C36 | 4.778375  | -0.307559 | -2.575007 | C78 | 6.917349  | -0.140516 | -1.304095 |
| H37 | 6.294379  | -0.739520 | -4.051650 | F79 | 0.548627  | 2.269544  | -5.143257 |
| C38 | 5.243311  | -0.601659 | -3.853896 | F80 | 0.501783  | 2.241824  | -7.843951 |
| H39 | 4.749928  | -0.976323 | -5.899943 | F81 | -0.175689 | -0.026671 | -9.156000 |
| C40 | 4.342866  | -0.735016 | -4.925383 | F82 | -0.808900 | -2.267421 | -7.776662 |
| C41 | 4.882338  | 0.269540  | 2.425284  | F83 | -0.766539 | -2.240592 | -5.076372 |
| H42 | 2.590814  | 0.275899  | 5.645016  | F84 | -7.719855 | 0.402391  | -2.107485 |
| C43 | 3.186607  | 0.276390  | 4.743810  | F85 | -8.963489 | 0.143361  | 0.205470  |
| H44 | 5.025048  | 0.427568  | 5.812938  | F86 | -7.634174 | -0.164469 | 2.460485  |
| C45 | 4.570259  | 0.360547  | 4.832089  | F87 | -0.200326 | 2.261417  | 5.140417  |
| H46 | 6.478105  | 0.406338  | 3.880283  | F88 | -0.158974 | 2.206164  | 7.842815  |
| C47 | 5.413839  | 0.353034  | 3.715886  | F89 | 0.142882  | -0.152702 | 9.136219  |
| H48 | -2.362021 | -0.395069 | 5.718021  | F90 | 0.405720  | -2.455776 | 7.738164  |
| C49 | -2.991414 | -0.345814 | 4.841576  | F91 | 0.361780  | -2.400010 | 5.036130  |
| C50 | -4.781531 | -0.222897 | 2.612209  | F92 | 7.723904  | 0.280884  | 2.148180  |
| H51 | -6.323184 | -0.370237 | 4.133858  | F93 | 8.959816  | -0.001706 | -0.165509 |
| C52 | -5.265869 | -0.334051 | 3.926446  | F94 | 7.621045  | -0.296875 | -2.420772 |
| H53 | -4.786001 | -0.487594 | 5.995923  | H95 | 0.740839  | 0.751165  | -1.047782 |

[1-5HF+H]<sup>+</sup>

E<sub>abs</sub> = -4010.940138 hartrees

| Atom | X         | Y         | Z         |
|------|-----------|-----------|-----------|
| C1   | 3.150811  | -1.250556 | 0.279606  |
| C2   | 3.654367  | -2.464038 | -0.265485 |
| C3   | 2.572337  | -3.364084 | -0.288480 |
| C4   | 1.421970  | -2.724330 | 0.152834  |
| C5   | 0.166584  | -3.343262 | 0.093525  |
| C6   | -1.069553 | -2.714905 | 0.213244  |
| C7   | -2.254928 | -3.461850 | 0.258891  |
| C8   | -3.353977 | -2.595124 | 0.369476  |
| C9   | -2.802073 | -1.260510 | 0.316896  |
| C10  | -3.461123 | -0.014275 | 0.210387  |
| N11  | -1.445607 | -1.390794 | 0.270737  |
| C12  | -2.819993 | 1.194460  | 0.006103  |
| C13  | -3.457352 | 2.526000  | -0.160229 |
| C14  | -2.381180 | 3.396805  | -0.312518 |
| C15  | -1.194839 | 2.621331  | -0.241744 |
| C16  | 0.039373  | 3.289543  | -0.310970 |
| C17  | 1.239562  | 2.629870  | -0.167243 |
| C18  | 2.433953  | 3.350775  | -0.086370 |
| C19  | 3.453802  | 2.454079  | 0.170407  |
| C20  | 2.902514  | 1.158195  | 0.230323  |
| C21  | 3.711617  | 0.061484  | 0.444156  |
| N22  | 1.539211  | 1.304498  | -0.003641 |
| H23  | -0.903866 | -0.537492 | 0.142300  |
| H24  | 0.877040  | 0.580613  | -0.221204 |
| N25  | -1.446684 | 1.318953  | -0.065030 |
| N26  | 1.796675  | -1.442454 | 0.491355  |
| C27  | 2.593323  | 4.711399  | -0.230566 |
| C28  | 4.775361  | 2.819469  | 0.274473  |
| H29  | 5.990684  | 4.617033  | 0.158060  |
| C30  | 4.989818  | 4.215062  | 0.101806  |
| H31  | 4.216325  | 6.160865  | -0.238555 |
| C32  | 3.951281  | 5.119272  | -0.132441 |
| H33  | 5.741700  | -2.248540 | -0.868238 |
| C34  | 4.877406  | -2.896946 | -0.809867 |
| C35  | 2.627082  | -4.691172 | -0.726458 |
| H36  | 4.013015  | -6.095231 | -1.594455 |
| C37  | 3.857754  | -5.093206 | -1.226165 |
| H38  | 5.877490  | -4.548263 | -1.696196 |
| C39  | 4.944827  | -4.190687 | -1.277167 |
| C40  | -2.325761 | -4.851254 | 0.178830  |

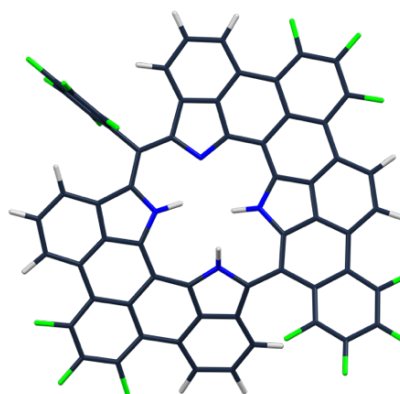

|     |           |           |           |
|-----|-----------|-----------|-----------|
| H41 | -5.523009 | -2.563340 | 0.579686  |
| C42 | -4.628800 | -3.160876 | 0.474265  |
| H43 | -5.699341 | -5.001947 | 0.537712  |
| C44 | -4.722276 | -4.543188 | 0.448119  |
| H45 | -3.779701 | -6.448712 | 0.256909  |
| C46 | -3.611051 | -5.384287 | 0.293320  |
| H47 | -5.631110 | 2.477244  | -0.079541 |
| C48 | -4.733209 | 3.068792  | -0.192044 |
| C49 | -2.436846 | 4.769540  | -0.484727 |
| H50 | -3.917070 | 6.351370  | -0.655365 |
| C51 | -3.740996 | 5.295500  | -0.522760 |
| H52 | -5.828192 | 4.894001  | -0.411138 |
| C53 | -4.839422 | 4.452050  | -0.379578 |
| C54 | 5.119564  | 0.383198  | 0.743173  |
| C55 | 7.845459  | 0.906919  | 1.313341  |
| C56 | 5.663539  | 1.710609  | 0.596062  |
| C57 | 5.966401  | -0.580145 | 1.312070  |
| C58 | 7.302464  | -0.347452 | 1.560864  |
| C59 | 7.022563  | 1.911255  | 0.854418  |
| C60 | -4.944592 | -0.031530 | 0.279721  |
| C61 | -7.731202 | -0.064564 | 0.415621  |
| C62 | -5.713114 | -0.174301 | -0.868494 |
| C63 | -5.600523 | 0.092624  | 1.497208  |
| C64 | -6.984098 | 0.078688  | 1.577652  |
| C65 | -7.097536 | -0.192034 | -0.814102 |
| C66 | 0.084147  | 4.746498  | -0.443831 |
| C67 | 0.150364  | 7.527073  | -0.768446 |
| C68 | 1.343548  | 5.440620  | -0.442660 |
| C69 | -1.143108 | 5.471889  | -0.570173 |
| C70 | -1.059429 | 6.849604  | -0.737007 |
| C71 | 1.324787  | 6.825511  | -0.612733 |
| C72 | 0.163112  | -4.791076 | -0.185506 |
| C73 | 0.171524  | -7.552214 | -0.648472 |
| C74 | 1.376558  | -5.446433 | -0.573050 |

|     |           |           |           |
|-----|-----------|-----------|-----------|
| C75 | -1.055082 | -5.533618 | -0.085120 |
| C76 | -0.999403 | -6.908303 | -0.307767 |
| C77 | 1.334272  | -6.819627 | -0.787546 |
| F78 | 5.499254  | -1.775101 | 1.673123  |
| F79 | 8.058880  | -1.304027 | 2.067860  |
| F80 | 9.122202  | 1.134341  | 1.554223  |
| F81 | 7.560981  | 3.118132  | 0.692204  |
| F82 | 2.459362  | 7.517045  | -0.626997 |
| F83 | 0.169205  | 8.838746  | -0.931796 |
| F84 | -2.150422 | 7.594683  | -0.874056 |

|     |           |           |           |
|-----|-----------|-----------|-----------|
| F85 | -4.894778 | 0.226899  | 2.614209  |
| F86 | -7.594113 | 0.199464  | 2.745298  |
| F87 | -9.049182 | -0.079971 | 0.479836  |
| F88 | -7.815561 | -0.329280 | -1.916799 |
| F89 | -5.115835 | -0.298107 | -2.048101 |
| F90 | -2.087882 | -7.666792 | -0.214635 |
| F91 | 0.179496  | -8.856730 | -0.851865 |
| F92 | 2.426169  | -7.495953 | -1.131483 |
| H93 | 1.284086  | -0.883427 | 1.158512  |

### [1-6HF+H]<sup>+</sup>

$E_{\text{abs}} = -3910,505768$  hartrees

| Atom | X         | Y         | Z         |
|------|-----------|-----------|-----------|
| C1   | -1.150462 | -1.125272 | 3.007825  |
| C2   | -0.728319 | -2.282616 | 3.645884  |
| C3   | -0.625919 | -3.280265 | 2.684940  |
| C4   | -0.957352 | -2.725040 | 1.451561  |
| C5   | -0.615439 | -3.369814 | 0.281050  |
| C6   | -0.552913 | -2.748675 | -0.968065 |
| C7   | -0.300816 | -3.496754 | -2.118267 |
| C8   | -0.305622 | -2.642030 | -3.234760 |
| C9   | -0.495487 | -1.302779 | -2.704430 |
| C10  | -0.400654 | -0.049002 | -3.329254 |
| N11  | -0.674054 | -1.443563 | -1.349613 |
| C12  | -0.408462 | 1.195324  | -2.689667 |
| C13  | -0.108627 | 2.502228  | -3.324250 |
| C14  | -0.054868 | 3.395080  | -2.254353 |
| C15  | -0.377036 | 2.671266  | -1.082926 |
| C16  | -0.418469 | 3.381270  | 0.133339  |
| C17  | -0.791732 | 2.798331  | 1.320406  |
| C18  | -0.579820 | 3.436682  | 2.546208  |
| C19  | -0.726866 | 2.484246  | 3.543695  |
| C20  | -1.065588 | 1.278732  | 2.924627  |
| C21  | -1.017977 | 0.098818  | 3.638789  |
| N22  | -1.159226 | 1.505518  | 1.574928  |
| H23  | -0.669768 | -0.602924 | -0.779006 |
| H24  | -1.153153 | 0.832675  | 0.824594  |
| N25  | -0.590368 | 1.365181  | -1.334521 |
| N26  | -1.332203 | -1.407178 | 1.666427  |
| C27  | -0.012337 | 4.679162  | 2.730222  |
| C28  | -0.291135 | 2.645398  | 4.846085  |

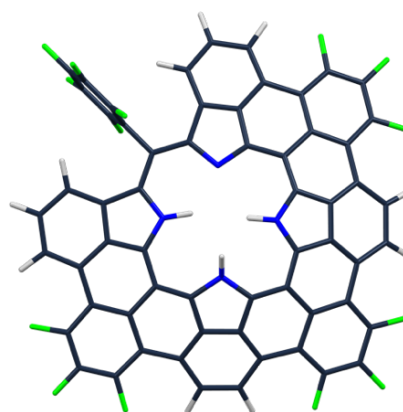

|     |           |           |           |
|-----|-----------|-----------|-----------|
| H29 | 0.564103  | 4.217679  | 6.076399  |
| C30 | 0.207494  | 3.950801  | 5.091522  |
| H31 | 0.775355  | 5.868935  | 4.368473  |
| C32 | 0.336169  | 4.923234  | 4.083699  |
| C33 | -0.221926 | -2.378641 | 4.934451  |
| C34 | -0.035469 | -4.511750 | 2.907774  |
| H35 | 0.854865  | -5.607563 | 4.549952  |
| C36 | 0.393172  | -4.679915 | 4.242005  |
| H37 | 0.718024  | -3.874503 | 6.188882  |
| C38 | 0.308256  | -3.656579 | 5.212777  |
| C39 | -0.050692 | -4.872841 | -2.121880 |
| H40 | -0.126282 | -2.661157 | -5.408381 |
| C41 | -0.116310 | -3.231702 | -4.490221 |
| H42 | 0.225685  | -5.075608 | -5.497156 |
| C43 | 0.083673  | -4.603305 | -4.532480 |
| H44 | 0.325765  | -6.474139 | -3.523823 |
| C45 | 0.133351  | -5.420851 | -3.389971 |
| H46 | 0.091982  | 2.416829  | -5.492892 |
| C47 | 0.128332  | 3.017212  | -4.595039 |
| C48 | 0.257157  | 4.747596  | -2.307470 |
| H49 | 0.732228  | 6.274912  | -3.773623 |

|     |           |           |           |
|-----|-----------|-----------|-----------|
| C50 | 0.490664  | 5.237890  | -3.600547 |
| H51 | 0.591856  | 4.796431  | -5.682798 |
| C52 | 0.413870  | 4.379994  | -4.698506 |
| C53 | -0.519559 | 0.132349  | 5.010045  |
| C54 | 0.407384  | 0.191867  | 7.642017  |
| C55 | -0.243674 | 1.399743  | 5.632883  |
| C56 | -0.202357 | -1.103746 | 5.675817  |
| C57 | 0.235375  | -1.020080 | 6.994605  |
| C58 | 0.191492  | 1.374227  | 6.956280  |
| C59 | -0.185853 | -0.077614 | -4.800365 |
| C60 | 0.213984  | -0.145089 | -7.560352 |
| C61 | 1.094284  | -0.152967 | -5.333903 |
| C62 | -1.261563 | -0.040355 | -5.676512 |
| C63 | -1.075609 | -0.072377 | -7.050010 |
| C64 | 1.306049  | -0.186031 | -6.702520 |
| C65 | 0.041065  | 4.767552  | 0.203029  |
| C66 | 0.913460  | 7.418320  | 0.308967  |
| C67 | 0.219855  | 5.412048  | 1.479449  |
| C68 | 0.342207  | 5.454512  | -1.013963 |
| C69 | 0.763859  | 6.775821  | -0.911410 |
| C70 | 0.653578  | 6.735566  | 1.478375  |

|     |           |           |           |
|-----|-----------|-----------|-----------|
| C71 | -0.159841 | -4.757319 | 0.397108  |
| C72 | 0.679123  | -7.410716 | 0.600009  |
| C73 | 0.096389  | -5.326923 | 1.693141  |
| C74 | 0.063239  | -5.512619 | -0.796193 |
| C75 | 0.466277  | -6.836260 | -0.643243 |
| C76 | 0.509966  | -6.654923 | 1.742122  |
| F77 | 0.523008  | -2.121864 | 7.676075  |
| F78 | 0.817977  | 0.219444  | 8.897768  |
| F79 | 0.436811  | 2.507177  | 7.603100  |
| F80 | 0.827074  | 7.384369  | 2.625596  |
| F81 | 1.316331  | 8.676521  | 0.345731  |
| F82 | 1.056463  | 7.492489  | -1.991123 |
| F83 | -2.498660 | 0.028443  | -5.198626 |
| F84 | -2.111090 | -0.035091 | -7.872474 |
| F85 | 0.403135  | -0.176718 | -8.866052 |
| F86 | 2.532103  | -0.256940 | -7.195303 |
| F87 | 2.143647  | -0.194582 | -4.520846 |
| F88 | 0.681715  | -7.614937 | -1.697876 |
| F89 | 1.062054  | -8.672093 | 0.685804  |
| F90 | 0.751212  | -7.237749 | 2.911158  |
| H91 | -2.007410 | -0.940414 | 1.079078  |

### [1-7HF+H]<sup>+</sup>

$E_{\text{abs}} = -3810.070211$  hartrees

| Atom | X         | Y         | Z         |
|------|-----------|-----------|-----------|
| C1   | -1.143154 | 0.663452  | -2.978251 |
| C2   | -0.598619 | -0.059659 | -4.078183 |
| C3   | 0.804868  | -0.012585 | -3.935481 |
| C4   | 1.133562  | 0.673155  | -2.776796 |
| C5   | 2.456455  | 0.672688  | -2.280749 |
| C6   | 2.832460  | 1.048606  | -1.002711 |
| C7   | 4.140435  | 0.800663  | -0.545429 |
| C8   | 4.149597  | 0.915547  | 0.838827  |
| C9   | 2.853613  | 1.238608  | 1.228249  |
| C10  | 2.463845  | 1.103089  | 2.555444  |
| N11  | 2.087325  | 1.394868  | 0.116405  |
| C12  | 1.125149  | 1.155239  | 2.892270  |
| C13  | 0.754033  | 0.762029  | 4.201276  |
| C14  | -0.617107 | 0.616850  | 4.168539  |
| C15  | -0.995551 | 0.914836  | 2.835093  |

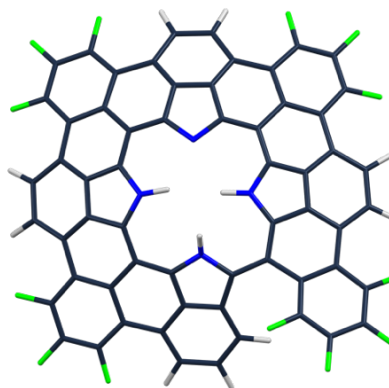

|     |           |          |           |
|-----|-----------|----------|-----------|
| C16 | -2.284966 | 0.583463 | 2.445414  |
| C17 | -2.665882 | 0.658372 | 1.120468  |
| C18 | -3.961787 | 0.324193 | 0.741785  |
| C19 | -4.033141 | 0.442972 | -0.636210 |
| C20 | -2.751876 | 0.804522 | -1.122895 |
| C21 | -2.486796 | 0.764732 | -2.480754 |
| N22 | -1.948238 | 0.948796 | 0.000548  |
| H23 | 1.087469  | 1.491070 | 0.227719  |
| H24 | -0.949665 | 1.058539 | 0.058538  |

|     |           |           |           |     |           |           |           |
|-----|-----------|-----------|-----------|-----|-----------|-----------|-----------|
| N25 | 0.051121  | 1.286545  | 2.063076  | C58 | 5.306832  | -0.316095 | 5.375738  |
| N26 | -0.058795 | 1.086287  | -2.213536 | C59 | 4.791903  | 0.374214  | 3.099730  |
| C27 | -4.941490 | -0.198784 | 1.565068  | C60 | 3.004404  | 0.261730  | 4.848994  |
| C28 | -5.133116 | 0.036675  | -1.357420 | C61 | 3.979668  | -0.176877 | 5.741175  |
| H29 | -7.102655 | -0.806122 | -1.014571 | C62 | 5.690457  | -0.063707 | 4.068632  |
| C30 | -6.187976 | -0.466451 | -0.550309 | C63 | -3.215661 | 0.004009  | 3.403467  |
| H31 | -6.954096 | -0.998214 | 1.359752  | C64 | -4.988139 | -1.134422 | 5.235642  |
| C32 | -6.102559 | -0.578285 | 0.844200  | C65 | -4.541993 | -0.351360 | 2.975099  |
| C33 | -1.116148 | -0.827127 | -5.140330 | C66 | -2.766321 | -0.276140 | 4.742078  |
| C34 | 1.734798  | -0.624187 | -4.790823 | C67 | -3.690761 | -0.834373 | 5.618734  |
| H35 | 1.804455  | -1.828085 | -6.575636 | C68 | -5.391968 | -0.902694 | 3.932755  |
| C36 | 1.183482  | -1.324261 | -5.851648 | C69 | 3.500019  | 0.055690  | -3.120190 |
| H37 | -0.599862 | -2.006116 | -6.827636 | C70 | 5.498370  | -0.976931 | -4.798433 |
| C38 | -0.220038 | -1.423889 | -5.996665 | C71 | 3.146801  | -0.493333 | -4.395530 |
| C39 | 5.179496  | 0.235895  | -1.254589 | C72 | 4.853662  | -0.062415 | -2.647843 |
| C40 | 5.156200  | 0.456924  | 1.672340  | C73 | 5.816746  | -0.553906 | -3.527710 |
| H41 | 7.150735  | -0.381651 | 1.480665  | C74 | 4.174113  | -0.962516 | -5.205880 |
| C42 | 6.279581  | -0.017768 | 0.955193  | F75 | -4.661504 | 1.281910  | -6.767431 |
| H43 | 7.168071  | -0.551999 | -0.897915 | F76 | -6.990272 | 0.275266  | -5.818001 |
| C44 | 6.287654  | -0.118554 | -0.445321 | F77 | -7.231484 | -0.330396 | -3.229600 |
| C45 | 1.569906  | 0.263986  | 5.186382  | F78 | -6.636015 | -1.238992 | 3.613452  |
| C46 | -1.361537 | -0.030921 | 5.122117  | F79 | -5.832124 | -1.658523 | 6.108407  |
| H47 | -1.029025 | -0.955214 | 7.070896  | F80 | -3.348211 | -1.105712 | 6.871762  |
| C48 | -0.565636 | -0.456414 | 6.231065  | F81 | 3.653174  | -0.492114 | 6.988902  |
| H49 | 1.342164  | -0.723446 | 7.119751  | F82 | 6.199935  | -0.726597 | 6.260106  |
| C50 | 0.826031  | -0.318308 | 6.260477  | F83 | 6.963984  | -0.275707 | 3.759285  |
| C51 | -3.700818 | 0.641422  | -3.318346 | F84 | 7.088979  | -0.638650 | -3.150376 |
| C52 | -5.951389 | 0.404216  | -5.015686 | F85 | 6.436639  | -1.426022 | -5.611876 |
| C53 | -4.974600 | 0.217337  | -2.796120 | F86 | 3.927056  | -1.439307 | -6.421901 |
| C54 | -3.671224 | 1.048320  | -4.658515 | H87 | -0.125971 | 1.913316  | -1.638625 |
| C55 | -4.753320 | 0.909033  | -5.503825 | H88 | -2.178782 | -0.957039 | -5.293075 |
| C56 | -6.048003 | 0.082893  | -3.678549 | F89 | -2.583823 | 1.618916  | -5.175022 |
| C57 | 3.436854  | 0.610992  | 3.520876  |     |           |           |           |

[1-8HF+H]<sup>+</sup>

E<sub>abs</sub> = -3709.642174 hartrees

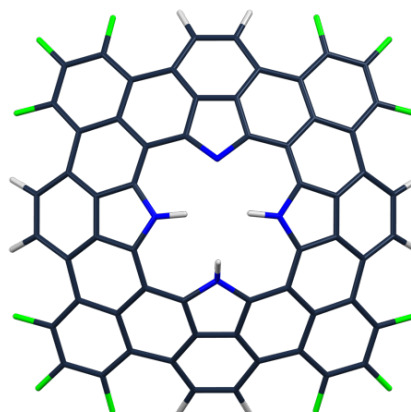

| Atom | X         | Y         | Z         |
|------|-----------|-----------|-----------|
| C1   | -1.258463 | -1.121990 | -2.848447 |
| C2   | -0.685439 | -0.693409 | -4.038292 |
| C3   | -0.685434 | 0.696818  | -4.043257 |
| C4   | -1.262977 | 1.133318  | -2.856576 |
| C5   | -1.059890 | 2.443794  | -2.422398 |
| C6   | -1.252888 | 2.846812  | -1.108484 |
| C7   | -0.807854 | 4.106931  | -0.684145 |
| C8   | -0.789266 | 4.106388  | 0.707243  |
| C9   | -1.213299 | 2.846143  | 1.127632  |
| C10  | -0.982449 | 2.412274  | 2.419279  |
| N11  | -1.561698 | 2.125005  | 0.023375  |
| C12  | -1.130329 | 1.075085  | 2.777724  |
| C13  | -0.658919 | 0.690475  | 4.058709  |
| C14  | -0.667839 | -0.684641 | 4.059638  |
| C15  | -1.133378 | -1.069810 | 2.779421  |
| C16  | -0.980545 | -2.414996 | 2.428427  |
| C17  | -1.212519 | -2.850658 | 1.136814  |
| C18  | -0.793673 | -4.110898 | 0.710697  |
| C19  | -0.812227 | -4.104279 | -0.677878 |
| C20  | -1.252998 | -2.839130 | -1.098744 |
| C21  | -1.056330 | -2.436786 | -2.413551 |
| N22  | -1.560951 | -2.116834 | 0.041907  |
| H23  | -1.692232 | 1.127652  | 0.114650  |
| H24  | -1.682354 | -1.118497 | 0.142362  |
| N25  | -1.457444 | -0.000318 | 2.002951  |
| N26  | -1.659793 | 0.005505  | -2.145122 |
| C27  | -0.140675 | -5.049747 | 1.487603  |
| C28  | -0.174747 | -5.054017 | -1.455438 |
| H29  | 0.907013  | -6.914992 | -1.182304 |
| C30  | 0.394836  | -6.101205 | -0.688813 |
| H31  | 0.934003  | -6.915244 | 1.200982  |
| C32  | 0.412211  | -6.101704 | 0.717213  |
| C33  | 0.003673  | -1.471549 | -4.960298 |
| C34  | 0.005356  | 1.472028  | -4.965699 |
| H35  | 1.170418  | 1.190804  | -6.766611 |
| C36  | 0.621086  | 0.706136  | -5.972006 |
| H37  | 1.167397  | -1.198149 | -6.762935 |
| C38  | 0.619427  | -0.709802 | -5.969666 |
| C39  | -0.169179 | 5.056549  | -1.461024 |
| C40  | -0.135810 | 5.047288  | 1.481335  |
| H41  | 0.934659  | 6.914563  | 1.197105  |
| C42  | 0.414848  | 6.100633  | 0.712311  |
| H43  | 0.910332  | 6.918214  | -1.185556 |
| C44  | 0.398934  | 6.102820  | -0.693935 |
| C45  | -0.041552 | 1.469468  | 5.007403  |
| C46  | -0.052837 | -1.466110 | 5.010131  |
| H47  | 0.988791  | -1.192766 | 6.903640  |
| C48  | 0.502009  | -0.699207 | 6.074349  |
| H49  | 0.997524  | 1.191744  | 6.902223  |
| C50  | 0.507530  | 0.700773  | 6.073389  |
| C51  | -0.360784 | -3.357967 | -3.316872 |
| C52  | 0.860960  | -5.150790 | -5.086903 |
| C53  | -0.023734 | -4.683540 | -2.870304 |
| C54  | 0.070483  | -2.900857 | -4.612709 |
| C55  | 0.645962  | -3.836481 | -5.465724 |
| C56  | 0.552079  | -5.547935 | -3.799685 |
| C57  | -0.321900 | 3.341293  | 3.339464  |
| C58  | 0.901815  | 5.131060  | 5.114098  |
| C59  | 0.020551  | 4.667786  | 2.895244  |
| C60  | 0.072564  | 2.892570  | 4.648451  |
| C61  | 0.654373  | 3.825436  | 5.501394  |
| C62  | 0.605303  | 5.526770  | 3.822694  |
| C63  | -0.327470 | -3.342711 | 3.348376  |
| C64  | 0.870099  | -5.135771 | 5.130447  |
| C65  | 0.012178  | -4.670127 | 2.902953  |
| C66  | 0.058572  | -2.892159 | 4.658459  |
| C67  | 0.626669  | -3.828296 | 5.516711  |
| C68  | 0.585322  | -5.531005 | 3.835931  |
| C69  | -0.358217 | 3.361886  | -3.324565 |
| C70  | 0.882022  | 5.146608  | -5.088939 |
| C71  | 0.075376  | 2.901743  | -4.618757 |
| C72  | -0.016260 | 4.685721  | -2.876312 |
| C73  | 0.569740  | 5.545906  | -3.802930 |



|     |          |           |           |
|-----|----------|-----------|-----------|
| C74 | 0.659766 | 3.834101  | -5.469372 |
| F75 | 1.029115 | -3.484144 | -6.687584 |
| F76 | 1.397164 | -6.007446 | -5.937389 |
| F77 | 0.841648 | -6.799152 | -3.460859 |
| F78 | 0.893030 | -6.777993 | 3.496851  |
| F79 | 1.405290 | -5.991420 | 5.984084  |
| F80 | 0.973900 | -3.485524 | 6.751644  |

|     |           |          |           |
|-----|-----------|----------|-----------|
| F81 | 1.012791  | 3.479035 | 6.732211  |
| F82 | 1.452136  | 5.983183 | 5.961377  |
| F83 | 0.916267  | 6.772133 | 3.480599  |
| F84 | 0.867969  | 6.794795 | -3.462784 |
| F85 | 1.429475  | 5.999525 | -5.936042 |
| F86 | 1.046362  | 3.479150 | -6.689477 |
| H87 | -2.444673 | 0.004134 | -1.511115 |

### [1Co]<sup>+</sup>

$E_{\text{abs}} = -5894.080534$  hartrees

| Atom | X         | Y         | Z         |
|------|-----------|-----------|-----------|
| C1   | 1.065921  | -2.718418 | 0.262436  |
| C2   | 2.168337  | -3.408804 | 0.948831  |
| C3   | 3.112188  | -2.421615 | 1.242757  |
| C4   | 2.600187  | -1.188339 | 0.642572  |
| C5   | 3.317067  | -0.085253 | 0.291903  |
| C6   | 2.714641  | 1.060458  | -0.306327 |
| C7   | 3.422180  | 2.161403  | -0.966814 |
| C8   | 2.465715  | 3.159175  | -1.175447 |
| C9   | 1.219096  | 2.646906  | -0.597657 |
| C10  | 0.083607  | 3.340670  | -0.309232 |
| N11  | 1.411747  | 1.324042  | -0.206411 |
| C12  | -1.066389 | 2.717525  | 0.261311  |
| C13  | -2.169032 | 3.408277  | 0.947007  |
| C14  | -3.113176 | 2.421308  | 1.240690  |
| C15  | -2.600903 | 1.187640  | 0.641464  |
| C16  | -3.317789 | 0.084240  | 0.291480  |
| C17  | -2.715430 | -1.062197 | -0.305324 |
| C18  | -3.422900 | -2.163595 | -0.965273 |
| C19  | -2.466194 | -3.161152 | -1.174039 |
| C20  | -1.219602 | -2.648583 | -0.596384 |
| C21  | -0.083857 | -3.341914 | -0.308360 |
| N22  | -1.412502 | -1.325634 | -0.205219 |
| N23  | -1.288039 | 1.406985  | 0.211584  |
| N24  | 1.287427  | -1.407990 | 0.212279  |
| H25  | -5.469775 | -1.540713 | -1.312985 |
| C26  | -4.721049 | -2.308355 | -1.443133 |
| H27  | -2.052009 | -5.077314 | -2.092614 |
| C28  | -2.785469 | -4.312503 | -1.881798 |
| H29  | -4.350709 | -5.343115 | -2.916152 |
| C30  | -4.084156 | -4.455526 | -2.355386 |

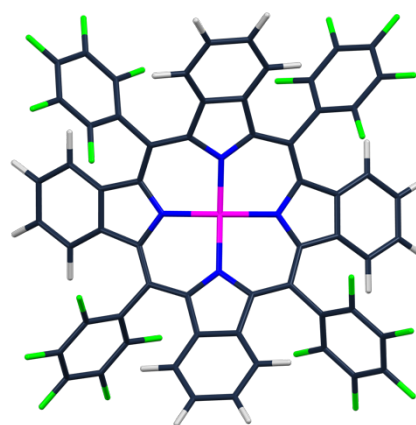

|     |           |           |           |
|-----|-----------|-----------|-----------|
| H31 | -6.043837 | -3.598297 | -2.524403 |
| C32 | -5.041340 | -3.468699 | -2.135539 |
| H33 | 1.626765  | -5.492984 | 1.202362  |
| C34 | 2.346379  | -4.712302 | 1.398476  |
| H35 | 4.950346  | -1.944607 | 2.278368  |
| C36 | 4.236075  | -2.708600 | 2.005131  |
| H37 | 5.275785  | -4.258720 | 3.055640  |
| C38 | 4.411311  | -4.012999 | 2.451096  |
| H39 | 3.634829  | -6.011460 | 2.509155  |
| C40 | 3.481708  | -5.002794 | 2.145588  |
| H41 | 5.468698  | 1.537660  | -1.314891 |
| C42 | 4.720259  | 2.305638  | -1.444996 |
| H43 | 2.051902  | 5.075500  | -2.093854 |
| C44 | 2.785145  | 4.310404  | -1.883344 |
| H45 | 4.350592  | 5.340441  | -2.918059 |
| C46 | 4.083850  | 4.452955  | -2.357238 |
| H47 | 6.043155  | 3.595088  | -2.526778 |
| C48 | 5.040762  | 3.465811  | -2.137622 |
| H49 | -1.627493 | 5.492518  | 1.200362  |
| C50 | -2.347279 | 4.711942  | 1.396090  |
| H51 | -4.952062 | 1.944813  | 2.275271  |
| C52 | -4.237528 | 2.708634  | 2.002241  |
| H53 | -5.277836 | 4.259104  | 3.051545  |

|     |           |           |           |       |           |           |           |
|-----|-----------|-----------|-----------|-------|-----------|-----------|-----------|
| C54 | -4.412981 | 4.013127  | 2.447637  | C78   | 5.320232  | 0.799796  | 1.485464  |
| H55 | -3.636338 | 6.011578  | 2.505338  | C79   | 6.684826  | 0.857195  | 1.717482  |
| C56 | -3.483073 | 5.002721  | 2.142341  | C80   | 7.018073  | -0.818592 | 0.018660  |
| C57 | -0.027430 | -4.802364 | -0.556846 | F81   | -4.521740 | -1.583643 | 2.191849  |
| C58 | 0.126013  | -7.550991 | -1.018787 | F82   | -7.188406 | -1.668853 | 2.624891  |
| C59 | -0.775094 | -5.697109 | 0.200705  | F83   | -8.837210 | -0.080056 | 1.179753  |
| C60 | 0.801219  | -5.316380 | -1.545818 | F84   | -7.829932 | 1.591975  | -0.693834 |
| C61 | 0.886259  | -6.678357 | -1.785598 | F85   | -5.168365 | 1.673725  | -1.132284 |
| C62 | -0.709213 | -7.062199 | -0.021607 | F86   | -1.571190 | -5.244279 | 1.162185  |
| C63 | 0.029216  | 4.801698  | -0.554863 | F87   | -1.429601 | -7.899935 | 0.705855  |
| C64 | -0.120807 | 7.551972  | -1.007914 | F88   | 0.196408  | -8.850082 | -1.237161 |
| C65 | 0.778234  | 5.693085  | 0.205340  | F89   | 1.680777  | -7.148897 | -2.732079 |
| C66 | -0.798741 | 5.319873  | -1.542223 | F90   | 1.538141  | -4.488801 | -2.278765 |
| C67 | -0.882167 | 6.682780  | -1.777536 | F91   | 5.172611  | -1.675630 | -1.125947 |
| C68 | 0.714106  | 7.058920  | -0.012566 | F92   | 7.833015  | -1.590298 | -0.681638 |
| C69 | -4.781225 | 0.054544  | 0.529591  | F93   | 8.834569  | 0.086545  | 1.190946  |
| C70 | -7.535335 | -0.038037 | 0.971155  | F94   | 7.181046  | 1.676744  | 2.628972  |
| C71 | -5.324183 | -0.796803 | 1.483272  | F95   | 4.515470  | 1.586886  | 2.190984  |
| C72 | -5.649626 | 0.855682  | -0.203309 | F96   | 1.573708  | 5.236154  | 1.165420  |
| C73 | -7.017297 | 0.820766  | 0.009701  | F97   | 1.435615  | 7.893366  | 0.717561  |
| C74 | -6.689341 | -0.852058 | 1.712532  | F98   | -0.189885 | 8.851867  | -1.221656 |
| C75 | 4.780109  | -0.053919 | 0.532244  | F99   | -1.676531 | 7.157432  | -2.722138 |
| C76 | 7.533188  | 0.042612  | 0.979587  | F100  | -1.536977 | 4.495644  | -2.277578 |
| C77 | 5.650912  | -0.855376 | -0.197327 | Co101 | -0.000380 | -0.000688 | -0.082356 |

### [1Co-HF]<sup>2+</sup>

$E_{\text{abs}} = -5793.662123$  hartrees

| Atom | X         | Y         | Z         |
|------|-----------|-----------|-----------|
| C1   | -2.821777 | -1.094762 | -0.152324 |
| C2   | -3.598748 | -2.079957 | 0.603091  |
| C3   | -2.667965 | -2.958800 | 1.160883  |
| C4   | -1.362835 | -2.529539 | 0.647765  |
| C5   | -0.228355 | -3.262980 | 0.527118  |
| C6   | 0.953888  | -2.742914 | -0.100632 |
| C7   | 2.042245  | -3.532633 | -0.677207 |
| C8   | 3.012398  | -2.608659 | -1.084994 |
| C9   | 2.520082  | -1.296574 | -0.652782 |
| C10  | 3.213032  | -0.130575 | -0.537585 |
| N11  | 1.219189  | -1.443736 | -0.174525 |
| C12  | 2.654853  | 1.058289  | 0.037582  |

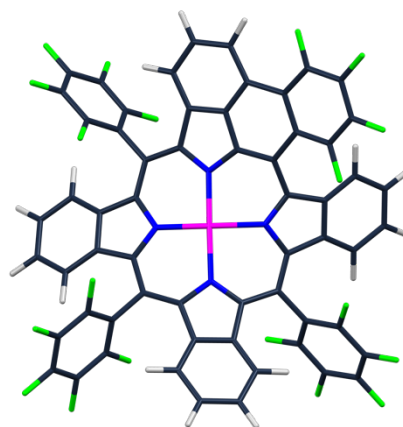

|     |           |          |          |
|-----|-----------|----------|----------|
| C13 | 3.426223  | 2.168084 | 0.614847 |
| C14 | 2.481755  | 3.088939 | 1.080533 |
| C15 | 1.175588  | 2.571830 | 0.670193 |
| C16 | 0.016080  | 3.286057 | 0.567696 |
| C17 | -1.187136 | 2.736145 | 0.052094 |

|     |           |           |           |      |           |           |           |
|-----|-----------|-----------|-----------|------|-----------|-----------|-----------|
| C18 | -2.395174 | 3.480476  | -0.361305 | C59  | -5.223248 | -0.933674 | -2.055506 |
| C19 | -3.266194 | 2.492791  | -0.816457 | C60  | -6.438193 | -0.876876 | -2.700734 |
| C20 | -2.642808 | 1.241778  | -0.619472 | C61  | -6.487256 | 1.490266  | -2.347080 |
| C21 | -3.339539 | 0.087090  | -0.802860 | C62  | 4.639234  | -0.093621 | -0.945475 |
| N22 | -1.364433 | 1.421795  | -0.106628 | C63  | 7.316341  | 0.018729  | -1.726954 |
| N23 | 1.348070  | 1.280307  | 0.157056  | C64  | 5.626724  | -0.734628 | -0.206011 |
| N24 | -1.526471 | -1.289503 | 0.003418  | C65  | 5.023220  | 0.608605  | -2.079565 |
| H25 | -2.235427 | 5.627267  | -0.059761 | C66  | 6.349043  | 0.671354  | -2.478841 |
| C26 | -2.837998 | 4.792964  | -0.390158 | C67  | 6.957286  | -0.688820 | -0.585752 |
| C27 | -4.558473 | 2.680447  | -1.271920 | C68  | -0.003050 | 4.724992  | 0.930153  |
| H28 | -5.979269 | 4.285103  | -1.633032 | C69  | -0.076977 | 7.432129  | 1.599077  |
| C29 | -4.989531 | 4.022435  | -1.292142 | C70  | -0.578968 | 5.150093  | 2.119539  |
| H30 | -4.495009 | 6.053154  | -0.893938 | C71  | 0.527472  | 5.684714  | 0.077184  |
| C31 | -4.136241 | 5.031339  | -0.865512 | C72  | 0.498915  | 7.031486  | 0.400006  |
| H32 | -5.670422 | -1.465037 | 0.512336  | C73  | -0.619614 | 6.491459  | 2.465034  |
| C33 | -4.947455 | -2.161971 | 0.916524  | C74  | -0.201310 | -4.664889 | 1.009252  |
| H34 | -2.363999 | -4.612857 | 2.521863  | C75  | -0.111229 | -7.301064 | 1.924262  |
| C35 | -3.071569 | -3.946273 | 2.048174  | C76  | -0.937134 | -5.665133 | 0.382676  |
| H36 | -4.762659 | -4.791914 | 3.053553  | C77  | 0.586067  | -5.017772 | 2.097457  |
| C37 | -4.425420 | -4.036436 | 2.354252  | C78  | 0.638717  | -6.322077 | 2.561970  |
| H38 | -6.398191 | -3.245472 | 2.061527  | C79  | -0.902753 | -6.975005 | 0.829743  |
| C39 | -5.352006 | -3.158675 | 1.795456  | F80  | -1.106863 | 4.256352  | 2.948701  |
| H40 | 1.455493  | -5.619362 | -0.641195 | F81  | -1.170084 | 6.879776  | 3.603278  |
| C41 | 2.194471  | -4.890860 | -0.940603 | F82  | -0.108869 | 8.712316  | 1.916482  |
| H42 | 4.862620  | -2.326593 | -2.173486 | F83  | 1.013280  | 7.933334  | -0.419497 |
| C43 | 4.128145  | -3.025328 | -1.800230 | F84  | 1.080241  | 5.312620  | -1.070722 |
| H44 | 5.132895  | -4.723500 | -2.628327 | F85  | -7.125110 | 2.640986  | -2.552546 |
| C45 | 4.272678  | -4.381423 | -2.065737 | F86  | -8.244589 | 0.410961  | -3.460178 |
| H46 | 3.459418  | -6.356218 | -1.853458 | F87  | -6.978002 | -1.967143 | -3.213863 |
| C47 | 3.324292  | -5.304589 | -1.631822 | F88  | -4.606311 | -2.114770 | -2.012519 |
| H48 | 5.540782  | 1.694903  | 0.493217  | F89  | -1.686091 | -5.371046 | -0.674022 |
| C49 | 4.784325  | 2.383267  | 0.835919  | F90  | -1.611046 | -7.913501 | 0.223410  |
| H50 | 2.153969  | 4.906493  | 2.210942  | F91  | -0.070807 | -8.546278 | 2.357148  |
| C51 | 2.872507  | 4.212071  | 1.800866  | F92  | 1.392646  | -6.638060 | 3.601158  |
| H52 | 4.550879  | 5.281939  | 2.587852  | F93  | 1.312136  | -4.088348 | 2.708457  |
| C53 | 4.227357  | 4.417083  | 2.021590  | F94  | 5.298101  | -1.404943 | 0.892189  |
| H54 | 6.224720  | 3.696097  | 1.716107  | F95  | 7.884417  | -1.307305 | 0.127161  |
| C55 | 5.171891  | 3.518127  | 1.534578  | F96  | 8.581759  | 0.069390  | -2.096143 |
| C56 | -4.628611 | 0.196569  | -1.480385 | F97  | 6.695728  | 1.344179  | -3.562907 |
| C57 | -7.083275 | 0.347662  | -2.837351 | F98  | 4.105356  | 1.242581  | -2.800623 |
| C58 | -5.253204 | 1.466649  | -1.690092 | Co99 | -0.068830 | 0.008621  | -0.136510 |

**[1Co-2HF]<sup>++</sup>** $E_{\text{abs}} = -5693.247686$  hartrees

| Atom | X         | Y         | Z         |
|------|-----------|-----------|-----------|
| C1   | 1.069625  | -2.865293 | 0.268352  |
| C2   | 2.208837  | -3.646086 | 0.575121  |
| C3   | 3.269394  | -2.774195 | 0.780208  |
| C4   | 2.703443  | -1.439249 | 0.458438  |
| C5   | 3.398723  | -0.288803 | 0.247549  |
| C6   | 2.778150  | 0.908289  | -0.215203 |
| C7   | 3.498778  | 2.047118  | -0.806642 |
| C8   | 2.520708  | 2.991488  | -1.124501 |
| C9   | 1.264118  | 2.455915  | -0.598341 |
| C10  | 0.148267  | 3.180310  | -0.287950 |
| N11  | 1.459386  | 1.137081  | -0.200723 |
| C12  | -1.048476 | 2.605613  | 0.207332  |
| C13  | -2.205666 | 3.360011  | 0.692250  |
| C14  | -3.269333 | 2.455081  | 0.714418  |
| C15  | -2.709625 | 1.166446  | 0.292245  |
| C16  | -3.412540 | 0.012030  | 0.054491  |
| C17  | -2.790975 | -1.221542 | -0.205981 |
| C18  | -3.493093 | -2.497180 | -0.493244 |
| C19  | -2.487716 | -3.456302 | -0.429435 |
| C20  | -1.276575 | -2.788953 | -0.189230 |
| C21  | -0.142978 | -3.518718 | 0.021574  |
| N22  | -1.459969 | -1.420077 | -0.103579 |
| N23  | -1.343750 | 1.299708  | 0.094347  |
| N24  | 1.332389  | -1.557819 | 0.226845  |
| H25  | -5.618862 | -2.267484 | -0.887302 |
| C26  | -4.773436 | -2.932120 | -0.781276 |
| C27  | -2.631436 | -4.829857 | -0.538320 |
| H28  | -4.188889 | -6.297613 | -0.940437 |
| C29  | -3.949470 | -5.252251 | -0.820671 |
| H30  | -5.961400 | -4.670926 | -1.179661 |
| C31  | -4.963997 | -4.315619 | -0.950159 |
| C32  | 2.233109  | -5.027163 | 0.658841  |
| H33  | 5.347559  | -2.717137 | 1.419256  |
| C34  | 4.476806  | -3.314732 | 1.188793  |
| H35  | 5.477176  | -5.150901 | 1.645470  |
| C36  | 4.542178  | -4.709034 | 1.321622  |
| H37  | 3.617734  | -6.622730 | 1.166550  |
| C38  | 3.474240  | -5.559415 | 1.053846  |
| H39  | 5.613856  | 1.568994  | -0.926565 |
| C40  | 4.827940  | 2.269477  | -1.158692 |
| H41  | 2.080627  | 4.847707  | -2.147543 |
| C42  | 2.836187  | 4.139017  | -1.840752 |
| H43  | 4.427445  | 5.232760  | -2.765868 |
| C44  | 4.161315  | 4.348950  | -2.198902 |
| H45  | 6.176263  | 3.615460  | -2.130432 |
| C46  | 5.146955  | 3.431816  | -1.847877 |
| H47  | -1.546775 | 5.366545  | 1.185981  |
| C48  | -2.367443 | 4.665680  | 1.147006  |
| H49  | -5.362375 | 2.176105  | 1.215782  |
| C50  | -4.523174 | 2.853301  | 1.169525  |
| H51  | -5.654983 | 4.485082  | 1.964098  |
| C52  | -4.686214 | 4.162399  | 1.602204  |
| H53  | -3.763365 | 6.066412  | 1.964347  |
| C54  | -3.619472 | 5.057166  | 1.598347  |
| C55  | -0.195739 | -4.973049 | 0.010898  |
| C56  | -0.300143 | -7.756764 | -0.041847 |
| C57  | -1.426816 | -5.622409 | -0.299449 |
| C58  | 0.978960  | -5.722891 | 0.324274  |
| C59  | 0.882903  | -7.106485 | 0.281980  |
| C60  | -1.428551 | -7.020710 | -0.326381 |
| C61  | 0.172796  | 4.650363  | -0.494203 |
| C62  | 0.200574  | 7.414128  | -0.880465 |
| C63  | 0.927764  | 5.478847  | 0.327012  |
| C64  | -0.569264 | 5.237200  | -1.510486 |
| C65  | -0.565132 | 6.607662  | -1.712015 |
| C66  | 0.951417  | 6.851096  | 0.143672  |
| C67  | -4.895850 | 0.034657  | 0.090421  |
| C68  | -7.685203 | 0.054610  | 0.148697  |
| C69  | -5.590821 | -0.455550 | 1.188843  |
| C70  | -5.627105 | 0.530987  | -0.980442 |
| C71  | -7.013076 | 0.547567  | -0.962175 |
| C72  | -6.975038 | -0.450796 | 1.230789  |
| C73  | 4.869006  | -0.304805 | 0.448955  |

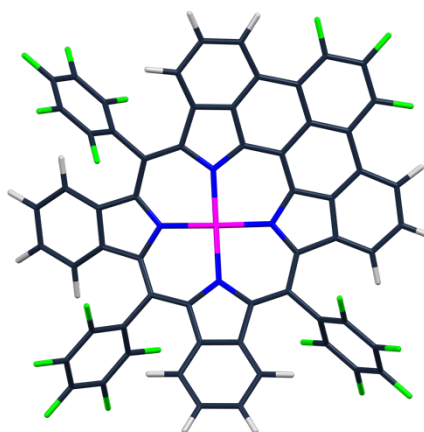

|     |           |           |           |
|-----|-----------|-----------|-----------|
| C74 | 7.632061  | -0.320296 | 0.846975  |
| C75 | 5.721605  | -0.897202 | -0.475770 |
| C76 | 5.431026  | 0.278555  | 1.576030  |
| C77 | 6.801687  | 0.278274  | 1.784947  |
| C78 | 7.093244  | -0.912510 | -0.289407 |
| F79 | -4.918347 | -0.943035 | 2.225831  |
| F80 | -7.621846 | -0.921990 | 2.284281  |
| F81 | -9.004250 | 0.065400  | 0.176970  |
| F82 | -7.695739 | 1.027554  | -1.988081 |
| F83 | -4.995230 | 1.008195  | -2.045572 |
| F84 | -2.532274 | -7.698126 | -0.621278 |
| F85 | -0.338498 | -9.077273 | -0.072349 |

|      |           |           |           |
|------|-----------|-----------|-----------|
| F86  | 1.928116  | -7.880031 | 0.549947  |
| F87  | 5.217808  | -1.460080 | -1.568622 |
| F88  | 7.889931  | -1.482326 | -1.179082 |
| F89  | 8.937684  | -0.328287 | 1.034265  |
| F90  | 7.319444  | 0.841357  | 2.863357  |
| F91  | 4.645978  | 0.862108  | 2.473933  |
| F92  | 1.645061  | 4.953217  | 1.313927  |
| F93  | 1.677222  | 7.625540  | 0.933258  |
| F94  | 0.213771  | 8.720867  | -1.062642 |
| F95  | -1.280543 | 7.149915  | -2.683479 |
| F96  | -1.306763 | 4.473732  | -2.309154 |
| Co97 | -0.011052 | -0.121978 | 0.078082  |

### [1Co-3HF]<sup>2+</sup>

$E_{\text{abs}} = -5592.830756$  hartrees

| Atom | X         | Y         | Z         |
|------|-----------|-----------|-----------|
| C1   | -2.788733 | -1.057138 | 0.000414  |
| C2   | -3.597330 | -2.199447 | 0.207609  |
| C3   | -2.755352 | -3.253079 | 0.539680  |
| C4   | -1.392636 | -2.678526 | 0.433871  |
| C5   | -0.215527 | -3.368499 | 0.475745  |
| C6   | 1.033866  | -2.779816 | 0.152197  |
| C7   | 2.284842  | -3.523433 | -0.104591 |
| C8   | 3.157659  | -2.563160 | -0.607318 |
| C9   | 2.506709  | -1.310286 | -0.539923 |
| C10  | 3.196105  | -0.169758 | -0.828517 |
| N11  | 1.212752  | -1.465948 | -0.061984 |
| C12  | 2.701805  | 1.073242  | -0.296722 |
| C13  | 3.526031  | 2.136583  | 0.280793  |
| C14  | 2.635206  | 3.105255  | 0.742576  |
| C15  | 1.299577  | 2.621227  | 0.384473  |
| C16  | 0.157624  | 3.359800  | 0.308449  |
| C17  | -1.099638 | 2.803613  | -0.050495 |
| C18  | -2.350464 | 3.555422  | -0.287216 |
| C19  | -3.325124 | 2.565469  | -0.374547 |
| C20  | -2.685278 | 1.325435  | -0.235593 |
| C21  | -3.419484 | 0.177866  | -0.219145 |
| N22  | -1.326463 | 1.480299  | -0.074547 |
| N23  | 1.411782  | 1.305945  | -0.102249 |

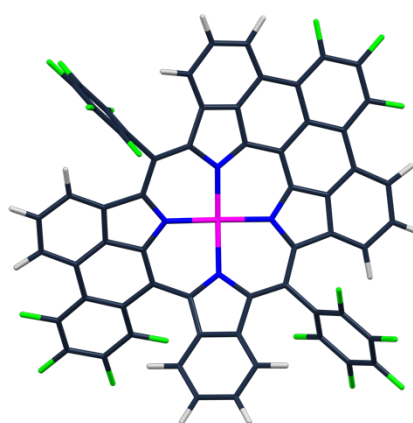

|     |           |           |           |
|-----|-----------|-----------|-----------|
| N24 | -1.487780 | -1.316136 | 0.135350  |
| H25 | -2.078480 | 5.710335  | -0.412167 |
| C26 | -2.758595 | 4.870165  | -0.442762 |
| C27 | -4.684377 | 2.737155  | -0.566601 |
| H28 | -6.109363 | 4.351457  | -0.883540 |
| C29 | -5.076198 | 4.084623  | -0.721397 |
| H30 | -4.462677 | 6.119703  | -0.794242 |
| C31 | -4.126525 | 5.098124  | -0.664445 |
| C32 | -4.980411 | -2.223160 | 0.136352  |
| H33 | -2.777718 | -5.345402 | 1.141000  |
| C34 | -3.342241 | -4.472660 | 0.845140  |
| H35 | -5.214952 | -5.491385 | 1.013839  |
| C36 | -4.738155 | -4.547596 | 0.777376  |
| H37 | -6.621454 | -3.617883 | 0.408288  |
| C38 | -5.552564 | -3.471593 | 0.430553  |
| H39 | 2.173961  | -5.621194 | 0.458659  |
| C40 | 2.765368  | -4.814929 | 0.049713  |

|     |           |           |           |      |           |           |           |
|-----|-----------|-----------|-----------|------|-----------|-----------|-----------|
| C41 | 4.470859  | -2.769590 | -0.991785 | C69  | 0.744960  | 5.712281  | -0.308206 |
| H42 | 5.947360  | -4.358520 | -1.102956 | C70  | 0.776958  | 7.072643  | -0.047043 |
| C43 | 4.936827  | -4.089344 | -0.836255 | C71  | -0.305496 | 6.671147  | 2.068339  |
| H44 | 4.481127  | -6.070132 | -0.205058 | C72  | -0.253431 | -4.826000 | 0.753662  |
| C45 | 4.092700  | -5.065970 | -0.324249 | C73  | -0.324039 | -7.565724 | 1.275910  |
| H46 | 5.583169  | 1.469395  | 0.204072  | C74  | -0.455956 | -5.742712 | -0.270214 |
| C47 | 4.889076  | 2.234754  | 0.525239  | C75  | -0.085288 | -5.309402 | 2.043615  |
| H48 | 2.425343  | 4.957810  | 1.846773  | C76  | -0.119187 | -6.668546 | 2.316127  |
| C49 | 3.096393  | 4.209802  | 1.449053  | C77  | -0.493554 | -7.105093 | -0.024072 |
| H50 | 4.842572  | 5.165766  | 2.234712  | F78  | -0.862738 | 4.481265  | 2.668062  |
| C51 | 4.462981  | 4.318046  | 1.677389  | F79  | -0.809557 | 7.132136  | 3.200985  |
| H52 | 6.407425  | 3.444644  | 1.429007  | F80  | 0.275437  | 8.842853  | 1.405224  |
| C53 | 5.348993  | 3.343306  | 1.223131  | F81  | 1.304271  | 7.914948  | -0.919640 |
| C54 | -4.868773 | 0.248515  | -0.325905 | F82  | 1.254062  | 5.267470  | -1.450565 |
| C55 | -7.634266 | 0.380483  | -0.609911 | F83  | -7.532390 | 2.667927  | -0.909329 |
| C56 | -5.490665 | 1.515166  | -0.546047 | F84  | -8.946597 | 0.431210  | -0.755982 |
| C57 | -5.641195 | -0.946682 | -0.196213 | F85  | -7.808801 | -1.897384 | -0.268830 |
| C58 | -7.014455 | -0.836323 | -0.355773 | F86  | -0.617946 | -5.310178 | -1.515246 |
| C59 | -6.880700 | 1.530455  | -0.690305 | F87  | -0.688066 | -7.965194 | -1.010173 |
| C60 | 4.484137  | -0.334934 | -1.504602 | F88  | -0.357989 | -8.861354 | 1.522836  |
| C61 | 6.939481  | -0.598197 | -2.846281 | F89  | 0.042736  | -7.113668 | 3.551034  |
| C62 | 5.145720  | -1.600660 | -1.546474 | F90  | 0.116247  | -4.459565 | 3.043591  |
| C63 | 5.038163  | 0.719770  | -2.240857 | F91  | 7.048419  | -2.829723 | -2.251344 |
| C64 | 6.253567  | 0.610687  | -2.879942 | F92  | 8.101018  | -0.711974 | -3.461952 |
| C65 | 6.379217  | -1.679389 | -2.199087 | F93  | 6.755092  | 1.634990  | -3.545765 |
| C66 | 0.199522  | 4.813979  | 0.600488  | F94  | 4.385778  | 1.875856  | -2.362377 |
| C67 | 0.249743  | 7.549579  | 1.146387  | Co95 | -0.058942 | -0.006846 | -0.122013 |
| C68 | -0.325091 | 5.315535  | 1.784741  |      |           |           |           |

### [1Co-4HF]<sup>+</sup>

$E_{\text{abs}} = -5492.425076$  hartrees

| Atom | X         | Y         | Z         |
|------|-----------|-----------|-----------|
| C1   | -2.772647 | -1.045222 | 0.030020  |
| C2   | -3.585399 | -2.204548 | -0.013054 |
| C3   | -2.743263 | -3.305411 | -0.079586 |
| C4   | -1.382109 | -2.724472 | -0.038350 |
| C5   | -0.214845 | -3.437893 | 0.006962  |
| C6   | 1.058285  | -2.839906 | 0.038896  |
| C7   | 2.335808  | -3.587899 | 0.069523  |

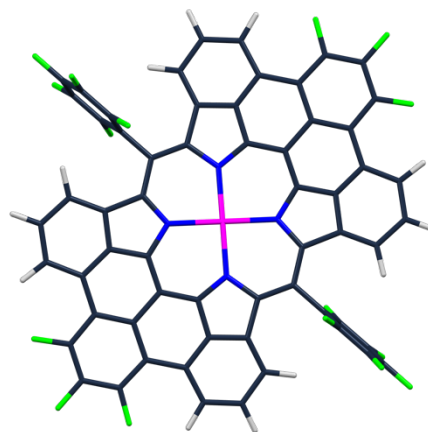

|    |          |           |           |
|----|----------|-----------|-----------|
| C8 | 3.308700 | -2.598149 | -0.005615 |
|----|----------|-----------|-----------|

|     |           |           |           |      |           |           |           |
|-----|-----------|-----------|-----------|------|-----------|-----------|-----------|
| C9  | 2.652057  | -1.353721 | -0.044459 | C52  | 5.533875  | 3.501374  | -0.279720 |
| C10 | 3.398674  | -0.205438 | -0.058792 | C53  | -4.857412 | 0.286729  | 0.068906  |
| N11 | 1.283022  | -1.505652 | -0.019011 | C54  | -7.645470 | 0.451545  | 0.112474  |
| C12 | 2.772022  | 1.045128  | -0.054513 | C55  | -5.488934 | 1.564516  | 0.121746  |
| C13 | 3.582994  | 2.204665  | -0.119772 | C56  | -5.634826 | -0.910463 | 0.036774  |
| C14 | 2.739255  | 3.305602  | -0.156956 | C57  | -7.017686 | -0.782949 | 0.062375  |
| C15 | 1.380000  | 2.724445  | -0.075342 | C58  | -6.885624 | 1.599623  | 0.138350  |
| C16 | 0.214662  | 3.437860  | 0.006960  | C59  | 4.856846  | -0.286755 | -0.083897 |
| C17 | -1.056902 | 2.840075  | 0.076747  | C60  | 7.644851  | -0.451594 | -0.128554 |
| C18 | -2.332878 | 3.587906  | 0.147471  | C61  | 5.489594  | -1.564671 | -0.053039 |
| C19 | -3.307478 | 2.597933  | 0.102912  | C62  | 5.632869  | 0.910486  | -0.138532 |
| C20 | -2.652431 | 1.353632  | 0.041987  | C63  | 7.015829  | 0.783024  | -0.156422 |
| C21 | -3.399089 | 0.205353  | 0.048642  | C64  | 6.886126  | -1.599687 | -0.080644 |
| N22 | -1.283349 | 1.505843  | 0.024361  | C65  | 0.290655  | 4.920197  | 0.014698  |
| N23 | 1.461336  | 1.334511  | -0.037884 | C66  | 0.434186  | 7.705930  | 0.032557  |
| N24 | -1.462105 | -1.334620 | 0.005356  | C67  | 0.462521  | 5.617032  | 1.203141  |
| H25 | -2.082922 | 5.744886  | 0.306834  | C68  | 0.191679  | 5.646174  | -1.164657 |
| C26 | -2.756296 | 4.902932  | 0.251455  | C69  | 0.261618  | 7.030236  | -1.169337 |
| C27 | -4.678613 | 2.779145  | 0.156965  | C70  | 0.535802  | 7.000793  | 1.225492  |
| H28 | -6.131474 | 4.391846  | 0.299912  | C71  | -0.289956 | -4.920238 | 0.011144  |
| C29 | -5.086895 | 4.126371  | 0.253350  | C72  | -0.431132 | -7.706184 | 0.019598  |
| H30 | -4.484375 | 6.161206  | 0.380261  | C73  | -0.223361 | -5.640578 | -1.173824 |
| C31 | -4.139021 | 5.137682  | 0.298527  | C74  | -0.428100 | -5.622890 | 1.200516  |
| C32 | -4.969615 | -2.218670 | -0.027701 | C75  | -0.499941 | -7.006815 | 1.218199  |
| H33 | -2.758443 | -5.477390 | -0.236739 | C76  | -0.292518 | -7.024597 | -1.183294 |
| C34 | -3.325046 | -4.561145 | -0.169114 | F77  | 0.560219  | 4.950678  | 2.347558  |
| H35 | -5.195198 | -5.596132 | -0.254740 | F78  | 0.700362  | 7.650757  | 2.365571  |
| C36 | -4.723450 | -4.623472 | -0.182135 | F79  | 0.501869  | 9.023485  | 0.040946  |
| H37 | -6.610003 | -3.637970 | -0.132803 | F80  | 0.164221  | 7.708408  | -2.300674 |
| C38 | -5.540401 | -3.501054 | -0.113456 | F81  | 0.023329  | 5.007744  | -2.316530 |
| H39 | 2.090549  | -5.744738 | 0.238625  | F82  | -7.543280 | 2.753472  | 0.180821  |
| C40 | 2.761976  | -4.902992 | 0.161695  | F83  | -8.964721 | 0.522110  | 0.132691  |
| C41 | 4.680737  | -2.779402 | 0.006593  | F84  | -7.812232 | -1.847179 | 0.039893  |
| H42 | 6.136881  | -4.392528 | 0.106782  | F85  | -0.087076 | -4.996575 | -2.326876 |
| C43 | 5.091605  | -4.126638 | 0.091558  | F86  | -0.226200 | -7.697090 | -2.320240 |
| H44 | 4.492927  | -6.161295 | 0.239426  | F87  | -0.497865 | -9.023803 | 0.023496  |
| C45 | 4.145395  | -5.137817 | 0.166861  | F88  | -0.632663 | -7.662419 | 2.359196  |
| C46 | 4.966060  | 2.218799  | -0.178503 | F89  | -0.494317 | -4.962270 | 2.350382  |
| H47 | 2.749480  | 5.478279  | -0.308173 | F90  | 7.544769  | -2.753513 | -0.061222 |
| C48 | 3.317958  | 4.561695  | -0.261494 | F91  | 8.964197  | -0.522293 | -0.150001 |
| H49 | 5.184374  | 5.596927  | -0.404695 | F92  | 7.809250  | 1.847282  | -0.201886 |
| C50 | 4.715200  | 4.624101  | -0.319296 | Co93 | 0.000645  | 0.000031  | 0.049765  |
| H51 | 6.602290  | 3.638288  | -0.333438 |      |           |           |           |

# [1Co-5HF]<sup>+</sup>

$E_{\text{abs}} = -5391.986971$  hartrees

| Atom | X         | Y         | Z         |
|------|-----------|-----------|-----------|
| C1   | -2.747204 | 0.032455  | 0.915225  |
| C2   | -3.577408 | 0.085492  | 2.059879  |
| C3   | -2.759813 | 0.305365  | 3.162645  |
| C4   | -1.385871 | 0.284239  | 2.610373  |
| C5   | -0.222808 | 0.228591  | 3.338438  |
| C6   | 1.048267  | 0.034145  | 2.761569  |
| C7   | 2.325582  | -0.144613 | 3.501525  |
| C8   | 3.280677  | -0.302364 | 2.499982  |
| C9   | 2.617061  | -0.219099 | 1.270072  |
| C10  | 3.337837  | -0.347029 | 0.117021  |
| N11  | 1.264414  | -0.012179 | 1.426126  |
| C12  | 2.691538  | -0.209870 | -1.102368 |
| C13  | 3.483084  | -0.192916 | -2.268192 |
| C14  | 2.629348  | 0.118199  | -3.294513 |
| C15  | 1.334709  | 0.249688  | -2.724197 |
| C16  | 0.266978  | 0.475778  | -3.548059 |
| C17  | -1.034445 | 0.220059  | -2.997396 |
| C18  | -2.264816 | -0.135001 | -3.727724 |
| C19  | -3.242172 | -0.213847 | -2.743017 |
| C20  | -2.612845 | -0.017692 | -1.501463 |
| C21  | -3.349400 | -0.099817 | -0.352028 |
| N22  | -1.256833 | 0.201573  | -1.660981 |
| N23  | 1.398578  | 0.024968  | -1.354110 |
| N24  | -1.452680 | 0.165664  | 1.225463  |
| H25  | -1.911273 | -0.485016 | -5.840436 |
| C26  | -2.618816 | -0.468254 | -5.021570 |
| C27  | -4.573867 | -0.539109 | -2.921093 |
| H28  | -5.933946 | -1.114285 | -4.520116 |
| C29  | -4.923585 | -0.842006 | -4.256403 |
| H30  | -4.256344 | -1.079770 | -6.262135 |
| C31  | -3.958530 | -0.816989 | -5.254416 |
| C32  | -4.957700 | -0.024778 | 2.057452  |
| H33  | -2.824426 | 0.660081  | 5.308345  |
| C34  | -3.370337 | 0.459608  | 4.397786  |
| H35  | -5.261856 | 0.490478  | 5.395995  |
| C36  | -4.766503 | 0.366161  | 4.440352  |
| H37  | -6.625825 | 0.063413  | 3.444406  |
| C38  | -5.556134 | 0.124060  | 3.319910  |

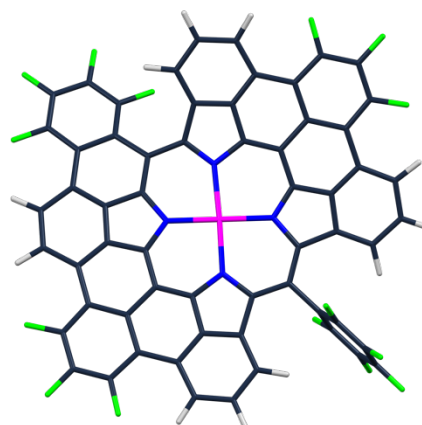

|     |           |           |           |
|-----|-----------|-----------|-----------|
| H39 | 2.125842  | -0.083796 | 5.668775  |
| C40 | 2.773886  | -0.197382 | 4.811508  |
| C41 | 4.643641  | -0.519537 | 2.646318  |
| H42 | 6.105089  | -0.739208 | 4.243393  |
| C43 | 5.068773  | -0.575546 | 3.990011  |
| H44 | 4.509008  | -0.460046 | 6.037808  |
| C45 | 4.146819  | -0.414104 | 5.017706  |
| C46 | 4.834637  | -0.378899 | -2.377869 |
| C47 | 3.017550  | 0.220288  | -4.601978 |
| H48 | 4.843262  | 0.035989  | -5.779541 |
| C49 | 4.415580  | -0.015319 | -4.788645 |
| H50 | 6.328555  | -0.432898 | -3.967342 |
| C51 | 5.283498  | -0.290874 | -3.730510 |
| C52 | -4.793097 | -0.306554 | -0.438617 |
| C53 | -7.548192 | -0.728757 | -0.613061 |
| C54 | -5.393899 | -0.539772 | -1.712627 |
| C55 | -5.586875 | -0.276412 | 0.750188  |
| C56 | -6.950338 | -0.495524 | 0.617755  |
| C57 | -6.776358 | -0.745591 | -1.751754 |
| C58 | 4.778918  | -0.531762 | 0.141446  |
| C59 | 7.532685  | -0.926849 | 0.226475  |
| C60 | 5.424544  | -0.644215 | 1.408160  |
| C61 | 5.521245  | -0.586988 | -1.089501 |
| C62 | 6.889999  | -0.789914 | -0.996079 |
| C63 | 6.808099  | -0.845670 | 1.399184  |
| C64 | 0.616321  | 0.844503  | -4.937436 |
| C65 | 1.205634  | 1.575937  | -7.609994 |
| C66 | -0.283958 | 1.562734  | -5.732579 |
| C67 | 1.935818  | 0.643668  | -5.485816 |
| C68 | 2.166402  | 0.980417  | -6.820701 |
| C69 | -0.024759 | 1.889914  | -7.048430 |



|     |           |           |           |
|-----|-----------|-----------|-----------|
| C70 | -0.304107 | 0.314458  | 4.818654  |
| C71 | -0.444281 | 0.478009  | 7.599760  |
| C72 | -0.504377 | -0.822662 | 5.590625  |
| C73 | -0.172639 | 1.534489  | 5.467594  |
| C74 | -0.241086 | 1.628813  | 6.849007  |
| C75 | -0.576774 | -0.754687 | 6.972401  |
| F76 | -1.438614 | 1.998356  | -5.226869 |
| F77 | -0.930791 | 2.534123  | -7.762167 |
| F78 | 1.460200  | 1.890838  | -8.865797 |
| F79 | 3.364505  | 0.769075  | -7.361505 |
| F80 | -7.402681 | -0.960998 | -2.903845 |

|      |           |           |           |
|------|-----------|-----------|-----------|
| F81  | -8.852283 | -0.927573 | -0.684857 |
| F82  | -7.757921 | -0.493435 | 1.672019  |
| F83  | -0.631995 | -2.004483 | 4.998229  |
| F84  | -0.770012 | -1.846467 | 7.694115  |
| F85  | -0.511572 | 0.555466  | 8.915324  |
| F86  | -0.113924 | 2.798417  | 7.453389  |
| F87  | 0.024804  | 2.639005  | 4.758017  |
| F88  | 7.487739  | -0.967536 | 2.533644  |
| F89  | 8.839781  | -1.120494 | 0.266033  |
| F90  | 7.639803  | -0.855860 | -2.089427 |
| Co91 | -0.014741 | 0.059929  | -0.072938 |

### [1Co-6HF]<sup>2+</sup>

$E_{\text{abs}} = -5291.562535$  hartrees

| Atom | X         | Y        | Z         |
|------|-----------|----------|-----------|
| C1   | -2.762705 | 0.468884 | 0.816670  |
| C2   | -3.589657 | 0.284738 | 1.936876  |
| C3   | -2.770890 | 0.279508 | 3.065088  |
| C4   | -1.391527 | 0.429765 | 2.523679  |
| C5   | -0.207445 | 0.395886 | 3.255390  |
| C6   | 1.066679  | 0.398450 | 2.686058  |
| C7   | 2.353414  | 0.182790 | 3.405134  |
| C8   | 3.302108  | 0.062930 | 2.390767  |
| C9   | 2.641209  | 0.272918 | 1.169064  |
| C10  | 3.400091  | 0.287228 | 0.007788  |
| N11  | 1.302999  | 0.472192 | 1.338596  |
| C12  | 2.792651  | 0.557291 | -1.190104 |
| C13  | 3.538223  | 0.397196 | -2.384261 |
| C14  | 2.621553  | 0.459594 | -3.409502 |
| C15  | 1.377673  | 0.671410 | -2.789122 |
| C16  | 0.254473  | 0.632875 | -3.575903 |
| C17  | -0.958327 | 0.758765 | -2.948007 |
| C18  | -2.119410 | 0.606508 | -3.727960 |
| C19  | -3.160773 | 0.561579 | -2.828954 |
| C20  | -2.570982 | 0.674454 | -1.547318 |
| C21  | -3.352524 | 0.480460 | -0.439437 |
| N22  | -1.223142 | 0.819202 | -1.611425 |
| N23  | 1.471400  | 0.748769 | -1.429733 |

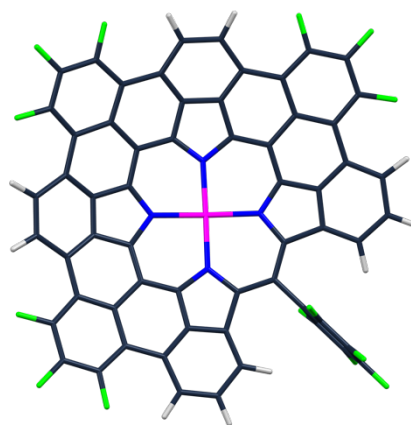

|     |           |           |           |
|-----|-----------|-----------|-----------|
| N24 | -1.447181 | 0.560719  | 1.157984  |
| C25 | -2.185908 | 0.231434  | -5.046874 |
| C26 | -4.438988 | 0.180147  | -3.124265 |
| H27 | -5.562056 | -0.410819 | -4.906833 |
| C28 | -4.594562 | -0.116299 | -4.523536 |
| H29 | -3.748987 | -0.382905 | -6.449579 |
| C30 | -3.531856 | -0.098323 | -5.428986 |
| C31 | -4.966266 | 0.101659  | 1.882602  |
| H32 | -2.859635 | 0.122983  | 5.234026  |
| C33 | -3.392620 | 0.128176  | 4.293665  |
| H34 | -5.287489 | -0.140274 | 5.252039  |
| C35 | -4.788482 | -0.024292 | 4.296959  |
| H36 | -6.635035 | -0.189303 | 3.246131  |
| C37 | -5.569475 | -0.049673 | 3.146040  |
| H38 | 2.167399  | 0.169437  | 5.573159  |
| C39 | 2.808875  | 0.072230  | 4.708621  |
| C40 | 4.664675  | -0.175495 | 2.521933  |

|     |           |           |           |      |           |           |           |
|-----|-----------|-----------|-----------|------|-----------|-----------|-----------|
| H41 | 6.132139  | -0.473549 | 4.098445  | C66  | 1.630886  | 0.028941  | -5.552607 |
| C42 | 5.096133  | -0.290470 | 3.857180  | C67  | 1.652873  | -0.331533 | -6.898361 |
| H43 | 4.550292  | -0.244844 | 5.911961  | C68  | -0.744202 | -0.250513 | -7.061635 |
| C44 | 4.180672  | -0.161524 | 4.896681  | C69  | -0.305705 | 0.265562  | 4.732072  |
| C45 | 4.816542  | -0.070140 | -2.508267 | C70  | -0.489801 | 0.016570  | 7.505291  |
| C46 | 2.841090  | 0.074792  | -4.709051 | C71  | -0.338481 | -0.984913 | 5.336106  |
| H47 | 4.540271  | -0.630628 | -5.894381 | C72  | -0.366770 | 1.388648  | 5.545693  |
| C48 | 4.206035  | -0.325592 | -4.911971 | C73  | -0.458152 | 1.277996  | 6.924869  |
| H49 | 6.127932  | -0.746991 | -4.122786 | C74  | -0.429848 | -1.122108 | 6.711488  |
| C50 | 5.136153  | -0.394453 | -3.872901 | F75  | -1.817423 | -0.419602 | -7.821170 |
| C51 | -4.767709 | 0.206832  | -0.620670 | F76  | 0.569750  | -0.795091 | -8.926044 |
| C52 | -7.478330 | -0.344897 | -0.932476 | F77  | 2.804777  | -0.576000 | -7.507180 |
| C53 | -5.311623 | 0.060961  | -1.946309 | F78  | -7.238858 | -0.356387 | -3.240283 |
| C54 | -5.578407 | 0.043902  | 0.541946  | F79  | -8.768784 | -0.598198 | -1.070928 |
| C55 | -6.931174 | -0.220384 | 0.335582  | F80  | -7.763818 | -0.376379 | 1.357437  |
| C56 | -6.672245 | -0.214466 | -2.047842 | F81  | -0.279999 | -2.079037 | 4.585145  |
| C57 | 4.808161  | -0.070964 | 0.015555  | F82  | -0.459331 | -2.320707 | 7.271616  |
| C58 | 7.495351  | -0.794867 | 0.064363  | F83  | -0.577072 | -0.101375 | 8.816952  |
| C59 | 5.443153  | -0.287554 | 1.274371  | F84  | -0.516311 | 2.357826  | 7.686934  |
| C60 | 5.516539  | -0.241980 | -1.226122 | F85  | -0.338708 | 2.598887  | 5.000687  |
| C61 | 6.858409  | -0.603171 | -1.147552 | F86  | 7.463066  | -0.863794 | 2.371614  |
| C62 | 6.790150  | -0.643634 | 1.248818  | F87  | 8.773247  | -1.132921 | 0.097203  |
| C63 | 0.337851  | 0.285345  | -4.976309 | F88  | 7.571273  | -0.772720 | -2.254944 |
| C64 | 0.494234  | -0.456700 | -7.650035 | Co89 | 0.027940  | 0.697050  | -0.111757 |
| C65 | -0.879666 | 0.111980  | -5.722897 |      |           |           |           |

### [1Co-7HF]<sup>2+</sup>

$E_{\text{abs}} = -5191.110026$  hartrees

| Atom | X         | Y         | Z         |
|------|-----------|-----------|-----------|
| C1   | -1.259616 | 2.665717  | -0.675082 |
| C2   | -2.495714 | 3.323793  | -0.461123 |
| C3   | -3.447099 | 2.331296  | -0.423816 |
| C4   | -2.754569 | 1.135902  | -0.661471 |
| C5   | -3.454411 | -0.032025 | -0.634310 |
| C6   | -2.755229 | -1.197197 | -0.870313 |
| C7   | -3.442825 | -2.420204 | -0.723090 |
| C8   | -2.468448 | -3.394727 | -0.776987 |
| C9   | -1.247890 | -2.707053 | -0.947979 |
| C10  | -0.076851 | -3.390507 | -0.817013 |

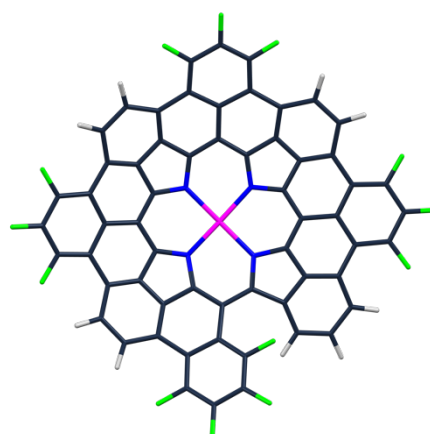

|     |           |           |           |
|-----|-----------|-----------|-----------|
| N11 | -1.422740 | -1.350840 | -1.019518 |
| C12 | 1.115289  | -2.669942 | -0.785357 |
| C13 | 2.294992  | -3.391735 | -0.537575 |
| C14 | 3.271642  | -2.444475 | -0.323380 |
| C15 | 2.648751  | -1.166318 | -0.428706 |

|     |           |           |           |      |           |           |           |
|-----|-----------|-----------|-----------|------|-----------|-----------|-----------|
| C16 | 3.366325  | -0.021722 | -0.133640 | C52  | -1.466077 | 5.434949  | -0.102089 |
| C17 | 2.754988  | 1.256837  | -0.388819 | C53  | -1.473342 | 6.806373  | 0.108662  |
| C18 | 3.369499  | 2.607105  | -0.477133 | C54  | 0.915390  | 6.941752  | -0.084947 |
| C19 | 2.292056  | 3.488849  | -0.437685 | C55  | -0.101480 | -4.806288 | -0.502875 |
| C20 | 1.122646  | 2.721667  | -0.499942 | C56  | -0.144407 | -7.515441 | 0.136925  |
| C21 | -0.087885 | 3.378732  | -0.532627 | C57  | -1.369484 | -5.463101 | -0.309992 |
| N22 | 1.402086  | 1.371685  | -0.526510 | C58  | 1.143238  | -5.496048 | -0.302999 |
| N23 | 1.319552  | -1.335465 | -0.766571 | C59  | 1.068200  | -6.851214 | -0.002753 |
| N24 | -1.405554 | 1.338320  | -0.810133 | C60  | -1.332749 | -6.822168 | 0.003631  |
| C25 | 4.628296  | 3.159537  | -0.633635 | C61  | 4.700111  | -0.282107 | 0.471429  |
| C26 | 2.325618  | 4.877936  | -0.433439 | C62  | 7.287444  | -0.688940 | 1.582696  |
| H27 | 3.791914  | 6.478731  | -0.571941 | C63  | 5.340663  | 0.675131  | 1.271546  |
| C28 | 3.624179  | 5.412083  | -0.554651 | C64  | 5.330273  | -1.583323 | 0.447562  |
| H29 | 5.699028  | 5.006461  | -0.796797 | C65  | 6.624658  | -1.719484 | 0.952357  |
| C30 | 4.719198  | 4.560225  | -0.675234 | C66  | 6.617142  | 0.509754  | 1.773292  |
| C31 | -2.701566 | 4.622546  | -0.097883 | C67  | -4.837420 | -0.054158 | -0.222388 |
| C32 | -4.751090 | 2.469396  | -0.021581 | C68  | -7.465888 | -0.106898 | 0.657241  |
| H33 | -6.032900 | 4.120360  | 0.631626  | C69  | -5.493920 | 1.193953  | 0.072229  |
| C34 | -5.039141 | 3.839077  | 0.309363  | C70  | -5.477539 | -1.330565 | -0.033900 |
| H35 | -4.391296 | 5.844098  | 0.564690  | C71  | -6.797346 | -1.298875 | 0.402469  |
| C36 | -4.072877 | 4.852684  | 0.271222  | C72  | -6.818185 | 1.107551  | 0.502421  |
| C37 | -4.714672 | -2.587223 | -0.235229 | F73  | 7.179813  | 1.478044  | 2.475679  |
| C38 | -2.625686 | -4.694940 | -0.375904 | F74  | 8.507871  | -0.853912 | 2.057208  |
| H39 | -4.265821 | -5.949788 | 0.349030  | F75  | 7.246036  | -2.895640 | 0.878403  |
| C40 | -3.981085 | -4.955511 | 0.031356  | F76  | 1.992022  | 7.717618  | -0.050723 |
| H41 | -5.936525 | -4.259869 | 0.470011  | F77  | -0.365386 | 8.863910  | 0.310342  |
| C42 | -4.963649 | -3.962357 | 0.102278  | F78  | -2.618332 | 7.446147  | 0.314303  |
| C43 | 2.414283  | -4.740430 | -0.297182 | F79  | -7.498854 | 2.209267  | 0.788186  |
| C44 | 4.544736  | -2.752612 | 0.064198  | F80  | -8.723363 | -0.136133 | 1.066288  |
| H45 | 5.740904  | -4.527976 | 0.484274  | F81  | -7.467177 | -2.426545 | 0.598388  |
| C46 | 4.765695  | -4.160516 | 0.199144  | F82  | -2.463166 | -7.493419 | 0.186640  |
| H47 | 4.004993  | -6.140536 | 0.227174  | F83  | -0.157205 | -8.806190 | 0.424592  |
| C48 | 3.751248  | -5.105672 | 0.045165  | F84  | 2.171335  | -7.564428 | 0.181491  |
| C49 | -0.180718 | 4.813206  | -0.315627 | Co85 | -0.008769 | 0.018247  | -0.865915 |
| C50 | -0.307414 | 7.558279  | 0.110168  | H86  | 5.525782  | 2.560947  | -0.729828 |
| C51 | 1.030136  | 5.565337  | -0.294713 | F87  | 4.715323  | 1.791013  | 1.647329  |

# [1Co-8HF]<sup>2+</sup>

$E_{\text{abs}} = -5090.691998$  hartrees

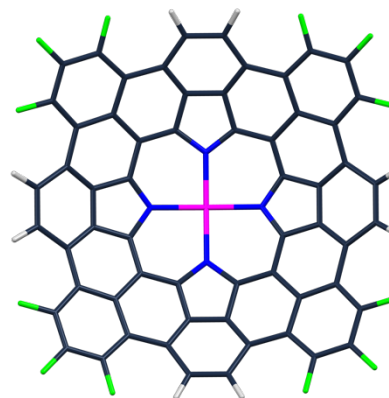

| Atom | X         | Y         | Z         |
|------|-----------|-----------|-----------|
| C1   | 2.939869  | 0.342063  | -1.160454 |
| C2   | 3.935904  | 1.284597  | -0.763596 |
| C3   | 3.299588  | 2.511099  | -0.766979 |
| C4   | 1.963633  | 2.245727  | -1.163455 |
| C5   | 1.023763  | 3.228060  | -0.987446 |
| C6   | -0.342056 | 2.939868  | -1.160454 |
| C7   | -1.284590 | 3.935903  | -0.763596 |
| C8   | -2.511093 | 3.299587  | -0.766979 |
| C9   | -2.245720 | 1.963632  | -1.163455 |
| C10  | -3.228053 | 1.023761  | -0.987446 |
| N11  | -0.922200 | 1.785514  | -1.460050 |
| C12  | -2.939862 | -0.342058 | -1.160454 |
| C13  | -3.935896 | -1.284592 | -0.763596 |
| C14  | -3.299580 | -2.511094 | -0.766979 |
| C15  | -1.963626 | -2.245722 | -1.163455 |
| C16  | -1.023755 | -3.228054 | -0.987446 |
| C17  | 0.342064  | -2.939863 | -1.160454 |
| C18  | 1.284598  | -3.935898 | -0.763596 |
| C19  | 2.511101  | -3.299581 | -0.766979 |
| C20  | 2.245728  | -1.963627 | -1.163455 |
| C21  | 3.228061  | -1.023756 | -0.987446 |
| N22  | 0.922208  | -1.785509 | -1.460050 |
| N23  | -1.754012 | -0.908936 | -1.437916 |
| N24  | 1.754009  | 0.909046  | -1.437856 |
| C25  | 1.027166  | -5.133217 | -0.153979 |
| C26  | 3.643118  | -3.776282 | -0.158552 |
| H27  | 4.277575  | -5.613808 | 0.841905  |
| C28  | 3.453355  | -5.095662 | 0.372328  |
| H29  | 2.165829  | -6.709765 | 0.842690  |
| C30  | 2.215975  | -5.737389 | 0.374010  |
| C31  | 5.133041  | 1.026046  | -0.154493 |
| C32  | 3.775245  | 3.643631  | -0.158960 |
| H33  | 5.613403  | 4.277000  | 0.841285  |
| C34  | 5.094869  | 3.452962  | 0.371925  |
| H35  | 6.708858  | 2.165722  | 0.842056  |
| C36  | 5.736389  | 2.215609  | 0.373603  |
| C37  | -1.027201 | 5.133249  | -0.154013 |
| C38  | -3.643130 | 3.776256  | -0.158575 |

|     |           |           |           |
|-----|-----------|-----------|-----------|
| H39 | -4.277586 | 5.613787  | 0.841912  |
| C40 | -3.453400 | 5.095645  | 0.372286  |
| H41 | -2.165855 | 6.709745  | 0.842660  |
| C42 | -2.216035 | 5.737371  | 0.374003  |
| C43 | -5.133012 | -1.026011 | -0.154456 |
| C44 | -3.775201 | -3.643640 | -0.158925 |
| H45 | -5.613413 | -4.277039 | 0.841284  |
| C46 | -5.094839 | -3.452971 | 0.371974  |
| H47 | -6.708891 | -2.165773 | 0.842062  |
| C48 | -5.736372 | -2.215594 | 0.373656  |
| C49 | 4.494687  | -1.413732 | -0.370430 |
| C50 | 6.921115  | -2.169197 | 0.812550  |
| C51 | 4.721331  | -2.790546 | -0.019337 |
| C52 | 5.463463  | -0.405288 | -0.019401 |
| C53 | 6.657483  | -0.832637 | 0.547104  |
| C54 | 5.954961  | -3.117879 | 0.548807  |
| C55 | -4.494638 | 1.413760  | -0.370443 |
| C56 | -6.921128 | 2.169143  | 0.812559  |
| C57 | -4.721325 | 2.790544  | -0.019363 |
| C58 | -5.463415 | 0.405321  | -0.019378 |
| C59 | -6.657477 | 0.832569  | 0.547135  |
| C60 | -5.954983 | 3.117841  | 0.548789  |
| C61 | -1.412591 | -4.495078 | -0.370815 |
| C62 | -2.169149 | -6.921118 | 0.812616  |
| C63 | -0.404499 | -5.464057 | -0.019316 |
| C64 | -2.789485 | -4.721257 | -0.019497 |
| C65 | -3.117419 | -5.954916 | 0.548821  |
| C66 | -0.832264 | -6.657680 | 0.547196  |
| C67 | 1.412625  | 4.495103  | -0.370831 |
| C68 | 2.169124  | 6.921143  | 0.812597  |
| C69 | 2.789540  | 4.721279  | -0.019518 |
| C70 | 0.404479  | 5.464071  | -0.019336 |

|     |           |           |          |      |           |           |           |
|-----|-----------|-----------|----------|------|-----------|-----------|-----------|
| C71 | 0.832248  | 6.657702  | 0.547160 | F79  | 4.376892  | 6.228491  | 0.866063  |
| C72 | 3.117410  | 5.954954  | 0.548789 | F80  | 2.521893  | 8.078029  | 1.345770  |
| F73 | 0.043661  | -7.599489 | 0.873890 | F81  | -0.043652 | 7.599522  | 0.873865  |
| F74 | -2.521873 | -8.078015 | 1.345777 | F82  | -6.229027 | 4.377084  | 0.866496  |
| F75 | -4.376909 | -6.228462 | 0.866094 | F83  | -8.077923 | 2.522090  | 1.345813  |
| F76 | 6.228973  | -4.377125 | 0.866500 | F84  | -7.599133 | -0.043826 | 0.873413  |
| F77 | 8.077910  | -2.522124 | 1.345801 | Co85 | 0.000004  | 0.000003  | -1.643400 |
| F78 | 7.599124  | 0.043739  | 0.873370 |      |           |           |           |

## 4. REFERENCES

- 1 M. Ruppel, D. Lungerich, S. Sturm, R. Lippert, F. Hampel, N. Jux, *Chem. Eur. J.* **2020**, *26*, 3287–3296.
- 2 B. D. Steinberg, E. A. Jackson, A. S. Filatov, A. Wakamiya, M. A. Petrukhina, L. T. Scott, *J. Am. Chem. Soc.* **2009**, *131*, 10537-10545.
- 3 J. P. Lewtak, D. T. Gryko, *Chem. Commun.* **2012**, *48*, 10069-10086.
- 4 M. Stepien, E. Gonka, M. Zyla, N. Sprutta, *Chem. Rev.* **2017**, *117*, 3479-3716.
- 5 Y. Minenkov, Å. Singstad, G. Occhipinti, V. R. Jensen, *Dalton Trans.*, **2012**, *41*, 5526–5541.
- 6 Y. Shao, L.F. Molnar, Y. Jung, J. Kussmann, C. Ochsenfeld, S.T. Brown, A.T.B. Gilbert, L.V. Slipchenko, S.V. Levchenko, D.P. O'Neill, R.A. DiStasio Jr., R.C. Lochan, T. Wang, G.J.O. Beran, N.A. Besley, J.M. Herbert, C.Y. Lin, T. Van Voorhis, S.H. Chien, A.Sodt, R.P. Steele, V.A. Rassolov, P.E. Maslen, P.P. Korambath, R.D. Adamson, B. Austin, J. Baker, E.F.C. Byrd, H. Dachsel, R.J. Doerksen, A. Dreuw, B.D. Dunietz, A.D. Dutoi, T.R. Furlani, S.R. Gwaltney, A. Heyden, S. Hirata, C-P. Hsu, G. Kedziora, R.Z. Khalliulin, P. Klunzinger, A.M. Lee, M.S. Lee, W.Z. Liang, I. Lotan, N. Nair, B. Peters, E.I. Proynov, P.A. Pieniazek, Y.M. Rhee, J. Ritchie, E. Rosta, C.D. Sherrill, A.C. Simmonett, J.E. Subotnik, H.L. Woodcock III, W. Zhang, A.T. Bell, A.K. Chakraborty, D.M. Chipman, F.J. Keil, A. Warshel, W.J. Hehre, H.F. Schaefer, J. Kong, A.I. Krylov, P.M.W. Gill and M. Head-Gordon, *Phys. Chem. Chem. Phys.* **2006**, *8*, 3172–3191.
- 7 J. P. Perdew, K. Burke, M. Ernzerhof, *Phys. Rev. Lett.* **1996**, *77*, 3865-3868.
- 8 F. Weigend, R. Ahlrichs, *Phys. Chem. Chem. Phys.* **2005**, *7*, 3297-3305.
- 9 F. Weigend, *Phys. Chem. Chem. Phys.* **2006**, *8*, 1057-1065.
- 10 M. Sierka, A. Hogekamp, R. Ahlrichs, *J. Chem. Phys.* **2003**, *118*, 9136-9148.
- 11 S. Grimme, J. Antony, S. Ehrlich, H. Krieg, *J. Chem. Phys.* **2010**, *132*, 154104.
- 12 TURBOMOLE V6.5 **2013**, University of Karlsruhe and Forschungszentrum Karlsruhe GmbH, 1989-2007, <http://www.turbomole.com>.
- 13 *NSDGUI*, Version 1.3 alpha version; Sandia National Laboratory: New Mexico, **2001**.
- 14 W. Jentzen, X.-Z. Song, J. A. Shelnut, *J. Phys. Chem. B*, **1997**, *101*, 1684–1699.
- 15 W. Jentzen, J.-G. Ma, J. A. Shelnut, *Biophys. J.* **1998**, *74*, 753–763.
- 16 J. A. Shelnut, *J. Porphyrins Phthalocyanines*, **2001**, *5*, 300–311.
- 17 J. Schindler, S. Kupfer, A. A. Ryan, K. J. Flanagan, M. O. Senge, B. Dietzek, *Coord. Chem. Rev.*, **2018**, *360*, 1–16.
- 18 M. O. Senge, S. A. MacGowan, J. M. O'Brien, *Chem. Commun.*, **2015**, *51*, 17031–17063.
